# Supplementary material for: Efficient synthesis of tetrasubstituted 2,3-allenoates and preliminary studies on bioactivities
Source: Royal Society of Chemistry journal article supplement (doi:10.1039/c8qo01202d), 2018-12-11

## Efficient Synthesis of Tetrasubstituted 2,3-Allenates and Preliminary Studies on Bioactivities

Yuan Yao,<sup>a</sup> Guirong Zhu,<sup>a</sup> Qin Chen,<sup>\*,a</sup> Hui Qian,<sup>\*,a</sup> and Shengming Ma<sup>\*,a,b</sup>

<sup>a</sup> Research Center for Molecular Recognition and Synthesis, Department of Chemistry, Fudan University, 220 Handan Lu, Shanghai 200433, P. R. China

<sup>b</sup> State Key Laboratory of Organometallic Chemistry, Shanghai Institute of Organic Chemistry, Chinese Academy of Sciences, 345 Lingling Lu, Shanghai 200032, P. R. China

E-mail: masm@sioac.ac.cn

qian\_hui@fudan.edu.cn

chenq@fudan.edu.cn

|                                                                         |          |
|-------------------------------------------------------------------------|----------|
| General information                                                     | S2       |
| Experimental details and analytical data                                | S3-S29   |
| References                                                              | S30      |
| <sup>1</sup> H and <sup>13</sup> C NMR and HPLC spectra of the products | S31-S108 |

**General Information.** NMR spectra were taken with an Agilent-400 spectrometer (400 MHz for  $^1\text{H}$  NMR, 100 MHz for  $^{13}\text{C}$  NMR, and 376 MHz for  $^{19}\text{F}$  NMR) in  $\text{CDCl}_3$  or  $\text{CD}_3\text{OD}$ .  $^1\text{H}$  NMR experiments were measured with tetramethylsilane (0 ppm) in  $\text{CDCl}_3$  or the signal of residual  $\text{CH}_3\text{OH}$  (3.31 ppm) in  $\text{CD}_3\text{OD}$  as the internal reference;  $^{13}\text{C}$  NMR experiments were measured in relative to the signal of  $\text{CDCl}_3$  (77.0 ppm) or the signal of  $\text{CD}_3\text{OD}$  (49.0 ppm);  $^{19}\text{F}$  NMR experiments were measured in relative to the signal of  $\text{CFCl}_3$  (0 ppm) in  $\text{CDCl}_3$ . All reactions were carried out in oven-dried Schlenk tubes or vials.  $\text{Pd}_2(\text{dba})_3 \cdot \text{CHCl}_3$  and tris(*o*-tolyl)phosphine were purchased from Energy Chemicals. Organoboronic acids were all commercially available: phenylboronic acid was purchased from Sinopharm Chemical Reagent Co., Ltd. (Shanghai, China) and recrystallized from ethyl acetate before use; other arylboronic acids (98% purity) were purchased from Shanghai Boka Chemical Technology Co., Ltd (Shanghai, China) and used as received. Petroleum ether (b.p. 60-90  $^\circ\text{C}$ ) was purchased from Shanghai Titan Scientific Co., Ltd. THF was dried over sodium wire with benzophenone as the indicator and distilled freshly before use.

## Experimental details and analytical data

### 1. Preparation of 3-methoxycarbonyl propargylic alcohols<sup>1</sup>

#### (1) Preparation of methyl 4-hydroxy-4-methyl-2-heptynoate (I) (yy-01-017)

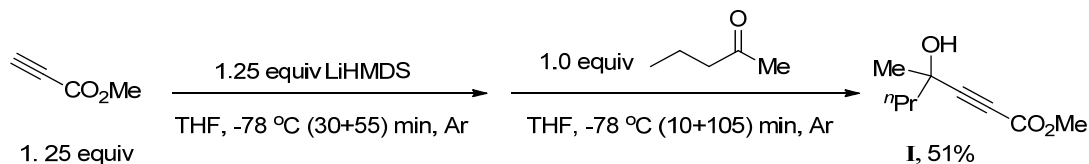

**Typical Procedure I:** To an oven oven-dried round-bottom flask were charged with anhydrous THF (50 mL) and methyl propiolate (5.3 mL,  $d = 0.945$  g/mL, 5.009 g, 60.0 mmol). The solution was cooled to  $-78$  °C under argon atmosphere, and LiHMDS (60 mL, 60.0 mmol, 1.0 M in THF) was added dropwise over 30 min. The resulting solution was stirred for 55 minutes before 2-pentanone (5.1 mL,  $d = 0.809$  g/mL, 4.126 g, 48.0 mmol) was added dropwise to the solution over 10 min. After stirring for 105 minutes at this temperature, the resulting mixture was quenched with a saturated  $\text{NH}_4\text{Cl}$  (aq.) solution (30 mL) and diluted with  $\text{H}_2\text{O}$  (200 mL). The resulting mixture was extracted with ethyl acetate (3 x 150 mL), and the combined organic layer was washed with brine (100 mL) and dried over anhydrous  $\text{Na}_2\text{SO}_4$ . After filtration, the solvent was removed under reduced pressure, the residue was purified by column chromatography on silica gel to afford **I** (4.1777 g, 51%) [eluent: petroleum ether/ethyl acetate = 7/1 (~240 mL) to petroleum ether/ethyl acetate = 4/1 (~250 mL)]: oil;  $^1\text{H NMR}$  (400 MHz,  $\text{CDCl}_3$ ):  $\delta = 3.78$  (s, 3 H,  $\text{OCH}_3$ ), 2.30 (s, 1 H, OH), 1.75-1.63 (m, 2 H,  $\text{CH}_2$ ), 1.62-1.42 (m, 5 H,  $\text{CH}_2$  and  $\text{CH}_3$ ), 0.97 (t,  $J = 7.4$  Hz, 3 H,  $\text{CH}_3$ );  $^{13}\text{C NMR}$  (100 MHz,  $\text{CDCl}_3$ ):  $\delta = 154.0, 91.1, 74.5, 67.9, 52.6, 44.9, 28.7, 17.6, 13.9$ ; **IR** (neat):  $\nu = 3411, 2961, 2875, 2233, 1715, 1699, 1434, 1371, 1239, 1159, 1135, 1086, 1032$   $\text{cm}^{-1}$ ; **MS** (ESI)  $m/z$ : 188.0 ( $\text{M}+\text{NH}_4^+$ ), 171.0 ( $\text{M}+\text{H}^+$ ); **HRMS** calcd for  $\text{C}_9\text{H}_{14}\text{O}_3$  [ $\text{M}^+$ ]: 170.0943; found 170.0941.

#### (2) Preparation of methyl 4-hydroxy-4-ethyl-2-hexynoate (II) (yao-01-088)

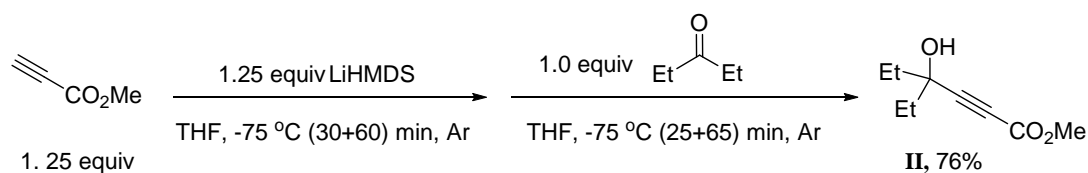

Following **Typical Procedure I**, the reaction of methyl propiolate (4.4 mL, d = 0.945 g/mL, 4.158 g, 50.0 mmol), LiHMDS (50 mL, 1.0 M in THF, 50.0 mmol), and 3-pentanone (4.2 mL, d = 0.815 g/mL, 3.423 g, 40.0 mmol) in freshly distilled THF (40 mL) afforded **II** (5.1368 g, 76%) [eluent: petroleum ether/ethyl acetate = 10/1 (~220 mL) to petroleum ether/ethyl acetate = 40/7 (~230 mL) ] to petroleum ether/ethyl acetate = 4/1 (~120 mL)]: oil; **<sup>1</sup>H NMR** (400 MHz, CDCl<sub>3</sub>): δ = 3.78 (s, 3 H, OCH<sub>3</sub>), 2.59 (s, 1 H, OH), 1.82-1.66 (m, 4 H, 2 x CH<sub>2</sub>), 1.05 (t, *J* = 7.6 Hz, 6 H, 2 x CH<sub>3</sub>); **<sup>13</sup>C NMR** (100 MHz, CDCl<sub>3</sub>): δ = 153.9, 90.1, 75.8, 72.0, 52.7, 33.7, 8.2; **IR** (neat): ν = 3430, 2973, 2232, 1715, 1700, 1458, 1435, 1239, 1146, 1049, 1031 cm<sup>-1</sup>; **MS** (ESI) *m/z*: 188 (M+NH<sub>4</sub><sup>+</sup>), 171 (M+H<sup>+</sup>); **HRMS** calcd for C<sub>9</sub>H<sub>18</sub>O<sub>3</sub>N [M+NH<sub>4</sub><sup>+</sup>]: 188.1281; found 188.1279.

### (3) Preparation of methyl 4-hydroxy-4,5,5-trimethyl-2-hexynoate (**III**) (yao-01-150)

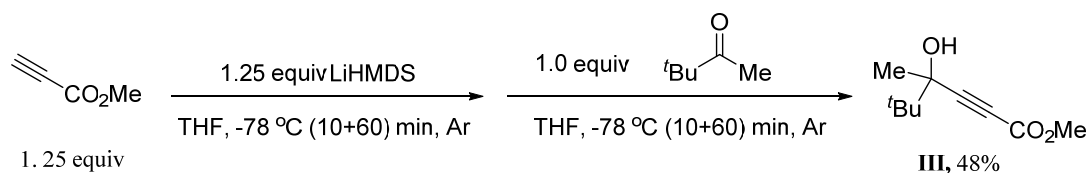

Following **Typical Procedure I**, the reaction of methyl propiolate (2.2 mL, d = 0.945 g/mL, 2.079 g, 25.0 mmol), LiHMDS (25 mL, 25.0 mmol, 1.0 M in THF), and 3,3-dimethyl-2-butanone (2.5 mL, d = 0.809 g/mL, 2.023 g, 20.0 mmol) in freshly distilled THF (30 mL) afforded **III**<sup>2</sup> (1.7823 g, 48%) [eluent: petroleum ether/ethyl acetate = 10/1 (~220 mL) to petroleum ether/ethyl acetate = 8/1 (~90 mL) ] to petroleum ether/ethyl acetate = 4/1 (~120 mL)]: oil; **<sup>1</sup>H NMR** (400 MHz, CDCl<sub>3</sub>): δ = 3.78 (s, 3 H, OCH<sub>3</sub>), 2.03 (s, 1 H, OH), 1.50 (s, 3 H, CH<sub>3</sub>), 1.07 (s, 9 H, *t*Bu); **<sup>13</sup>C NMR** (100 MHz, CDCl<sub>3</sub>): δ = 153.9, 91.0, 75.7, 73.9, 52.7, 38.2, 24.9, 24.1; **IR**

(neat):  $\nu = 3490, 2965, 2232, 1706, 1439, 1367, 1242, 1107, 1146, 1049, 1031 \text{ cm}^{-1}$ ;  
**MS** (ESI)  $m/z$ : 202 ( $M+\text{NH}_4^+$ ).

#### (4) Preparation of methyl 3-(1-hydroxycyclohexyl)propiolate (**IV**) (yao-01-151)

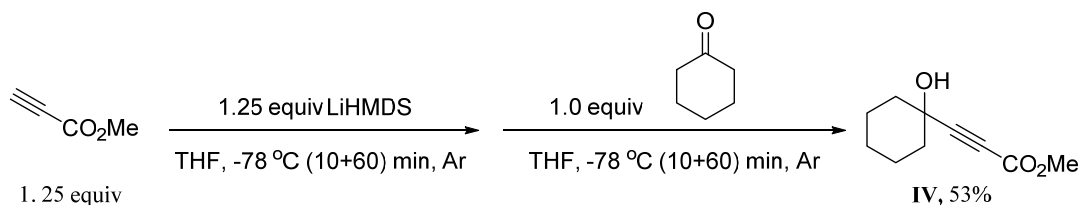

Following **Typical Procedure I**, the reaction of methyl propiolate (1.1 mL,  $d = 0.945 \text{ g/mL}$ , 1.040 g, 12.5 mmol), LiHMDS (12.5 mL, 12.5 mmol, 1.0 M in THF), and cyclohexanone (1.03 mL,  $d = 0.95 \text{ g/mL}$ , 0.979 g, 10.0 mmol) in freshly distilled THF (15 mL) afforded **IV**<sup>3</sup> (0.9610 g, 53%) [eluent: petroleum ether/ethyl acetate = 10/1 (~110 mL) to petroleum ether/ethyl acetate = 20/3 (~110 mL) ] to petroleum ether/ethyl acetate = 5/1 (~120 mL) to petroleum ether/ethyl acetate = 4/1 (~120 mL)]: solid; **m.p.** 50.9-60.9 °C (petroleum ether/ethyl ether); <sup>1</sup>**H NMR** (400 MHz,  $\text{CDCl}_3$ ):  $\delta = 3.79$  (s, 3 H,  $\text{OCH}_3$ ), 2.08 (s, 1 H, OH), 2.02-1.90 (m, 2 H,  $\text{CH}_2$ ), 1.80-1.49 (m, 7 H, 3 x  $\text{CH}_2$  and one proton of  $\text{CH}_2$ ), 1.34-1.21 (m, 1 H, one proton of  $\text{CH}_2$ ); <sup>13</sup>**C NMR** (100 MHz,  $\text{CDCl}_3$ ):  $\delta = 154.0, 90.8, 75.6, 68.4, 52.7, 39.0, 24.8, 22.8$ ; **IR** (neat):  $\nu = 3258, 2934, 2853, 2238, 1707, 1450, 1431, 1284, 1237, 1070, 1041 \text{ cm}^{-1}$ ; **MS** (ESI) 205 ( $M+\text{Na}^+$ ), 200 ( $M+\text{NH}_4^+$ ); Anal. Calcd. for  $\text{C}_{10}\text{H}_{14}\text{O}_3$ : C 65.92, H 7.74; found C 65.96, H 7.58.

#### (5) Preparation of methyl 4-hydroxy-4-methyl-6,6-dimethoxy-2-hexynoate (**V**) (yy-01-027)

(yy-01-027)

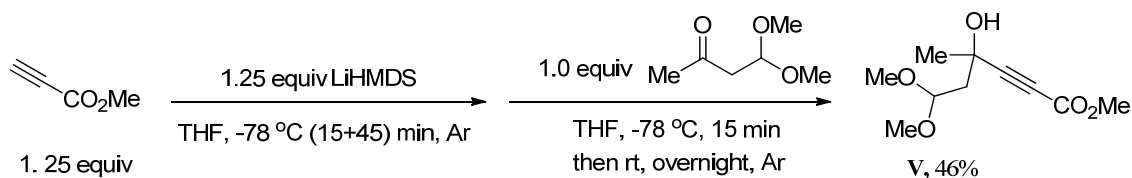

Following **Typical Procedure I**, the reaction of methyl propiolate (2.2 mL,  $d = 0.945 \text{ g/mL}$ , 2.079 g, 25.0 mmol), LiHMDS (25 mL, 25.0 mmol, 1.0 M in THF), and

4,4-dimethoxy-2-butanone (2.7 mL, d = 0.996 g/mL, 2.689 g, 20.0 mmol) in freshly distilled THF (30 mL) afforded **V** (1.8775 g, 46%) [eluent: petroleum ether/ethyl acetate = 100/13 (~110 mL) to petroleum ether/ethyl acetate = 100/17 (~120 mL) ] to petroleum ether/ethyl acetate = 5/1 (~120 mL) to petroleum ether/ethyl acetate = 10/3 (~130 mL)]; oil; **<sup>1</sup>H NMR** (400 MHz, CDCl<sub>3</sub>): δ = 4.85 (dd, *J*<sub>1</sub> = 8.4 Hz, *J*<sub>2</sub> = 3.6 Hz, 1 H, CH), 4.39 (s, 1 H, OH), 3.79 (s, 3 H, OCH<sub>3</sub>), 3.48 (s, 3 H, OCH<sub>3</sub>), 3.37 (s, 3 H, OCH<sub>3</sub>), 2.08-1.95 (m, 2 H, CH<sub>2</sub>), 1.53 (s, 3 H, CH<sub>3</sub>); **<sup>13</sup>C NMR** (100 MHz, CDCl<sub>3</sub>): δ = 153.7, 103.0, 89.7, 74.9, 65.2, 54.6, 52.64, 52.59, 43.6, 29.4; **IR** (neat): ν = 3459, 2939, 2234, 1714, 1435, 1369, 1243, 1118, 1041 cm<sup>-1</sup>; **MS** (ESI) *m/z*: 234 (M+NH<sub>4</sub><sup>+</sup>); **HRMS** calcd for C<sub>10</sub>H<sub>20</sub>O<sub>5</sub>N [M+NH<sub>4</sub><sup>+</sup>]: 234.1336; found 234.1334.

**(6) Preparation of methyl 4-hydroxy-4-methyloct-7-en-2-ynoate (VI) (yy-01-033)**

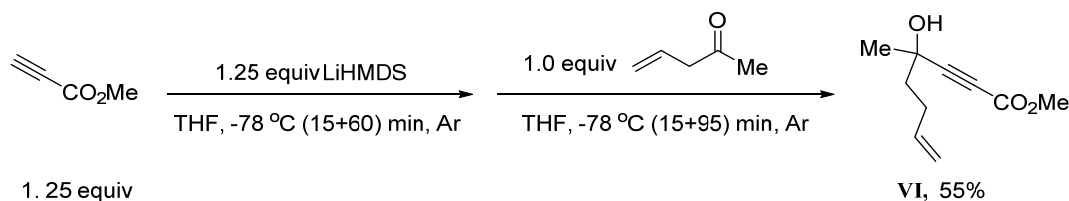

Following **Typical Procedure I**, the reaction of methyl propiolate (2.2 mL, d = 0.945 g/mL, 2.079 g, 25 mmol), LiHMDS (25 mL, 1.0 M in THF, 25 mmol), and pent-4-en-2-one (2.3 mL, d = 0.847 g/mL, 1.948 g, 20.0 mmol) in freshly distilled THF (30 mL) afforded **VI** (2.0028 g, 55%) [eluent: petroleum ether/ethyl acetate = 100/13 (~110 mL) to petroleum ether/ethyl acetate = 10/1 (~220 mL) ] to petroleum ether/ethyl acetate = 5/1 (~120 mL)]; oil; **<sup>1</sup>H NMR** (400 MHz, CDCl<sub>3</sub>): δ = 5.92-5.80 (m, 1 H, =CH), 5.10 (dq, *J*<sub>1</sub> = 17.2 Hz, *J*<sub>2</sub> = 1.8 Hz, 1 H, one proton of =CH<sub>2</sub>), 5.01 (dq, *J*<sub>1</sub> = 10.2 Hz, *J*<sub>2</sub> = 1.5 Hz, 1 H, one proton of =CH<sub>2</sub>), 3.79 (s, 3 H, CH<sub>3</sub>), 2.40-2.20 (m, 3 H, CH<sub>2</sub> and OH), 1.90-1.74 (m, 2 H, CH<sub>2</sub>), 1.55 (s, 3 H, CH<sub>3</sub>); **<sup>13</sup>C NMR** (100 MHz, CDCl<sub>3</sub>): δ = 153.9, 137.7, 115.4, 90.4, 75.2, 68.0, 52.8, 41.8, 29.1, 28.8; **IR** (neat): ν = 3420, 2953, 2234, 1715, 1699, 1642, 1435, 1371, 1248, 1018 cm<sup>-1</sup>; **MS**

(ESI)  $m/z$ : 205 ( $M+Na^+$ ), 200 ( $M+NH_4^+$ ), 183 ( $M+H^+$ ); **HRMS** calcd for  $C_{10}H_{14}O_3$  [ $M^+$ ]: 182.0943; found 182.0945.

## 2. Preparation of 3-methoxycarbonyl propargylic carbonates

### (1) Preparation of methyl 4-((methoxycarbonyl)oxy)-4-methyl-2-heptynoate (**1a**)

(yy-01-018)

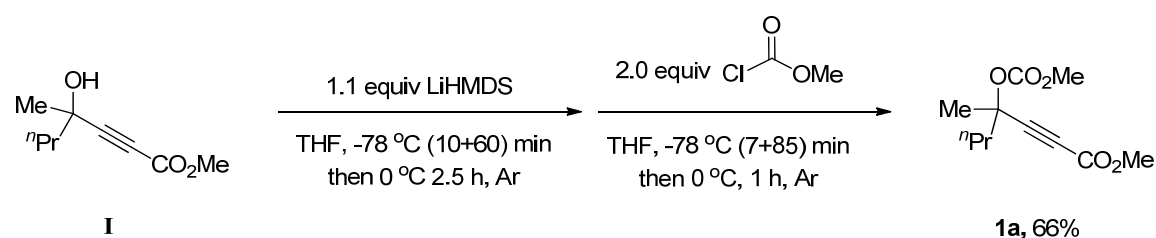

**Typical Procedure II:** To an oven-dried, round-bottom flask were charged with **I** (4.1777 g, 24.6 mmol). The solution was cooled to  $-78\text{ }^{\circ}\text{C}$  (dry ice-acetone bath) under argon atmosphere, and LiHMDS (27.1 mL, 27.1 mmol, 1.0 M in THF) was added dropwise over 10 min. The resulting solution was stirred for 1 hour at this temperature before stirring for 2.5 hours at  $0\text{ }^{\circ}\text{C}$  (ice-water bath). The reaction was cooled to  $-78\text{ }^{\circ}\text{C}$  (dry ice-acetone bath) again, methyl chloroformate (3.8 mL,  $d = 1.223\text{ g/mL}$ , 4.647 g, 49.2 mmol) was added dropwise over 7 min. After being stirred for 1.5 hours at the same temperature, it was allowed to stir for 1 hour at  $0\text{ }^{\circ}\text{C}$  (ice-water bath). The reaction was quenched with a saturated  $NH_4Cl$  (aq.) solution (20 mL) and diluted with  $H_2O$  (100 mL). The resulting solution was extracted with ethyl acetate (3 x 150 mL), and the combined organic layer was washed with brine (100 mL) and dried over anhydrous  $Na_2SO_4$ . After filtration, the solvent was removed under reduced pressure, and the residue was purified by column chromatography on silica gel to afford **1a** (3.6840 g, 66%) [eluent: petroleum ether/ethyl acetate = 20/1 (~200 mL) to petroleum ether/ethyl acetate = 5/1 (~120 mL)]: oil;  **$^1H$  NMR** (400 MHz,  $CDCl_3$ ):  $\delta = 3.784$  (s, 3 H,  $OCH_3$ ), 3.780 (s, 3 H,  $OCH_3$ ), 2.12-1.94 (m, 1 H, one proton of  $CH_2$ ), 1.91-1.80 (m, 1 H, one proton of  $CH_2$ ), 1.73 (s, 3 H,  $CH_3$ ), 1.65-1.41 (m, 2 H,  $CH_2$ ), 0.96 (t,  $J = 7.2\text{ Hz}$ , 3 H,  $CH_3$ );  **$^{13}C$  NMR** (100 MHz,  $CDCl_3$ ):  $\delta = 153.5, 153.3, 86.3, 76.9, 76.0, 54.5, 52.7, 42.8, 25.5, 17.2, 13.7$ ; **IR**

(neat):  $\nu = 2961, 2238, 1754, 1716, 1437, 1378, 1236, 1028 \text{ cm}^{-1}$ ; **MS** (ESI)  $m/z$ : 251 ( $M+Na^+$ ); **HRMS** calcd for  $C_{11}H_{16}O_5$  [ $M^+$ ]: 228.0998; found 228.1003.

**(2) Preparation of methyl 4-ethyl-4-((methoxycarbonyl)oxy)-2-hexynoate (1b)**  
(yy-01-020)

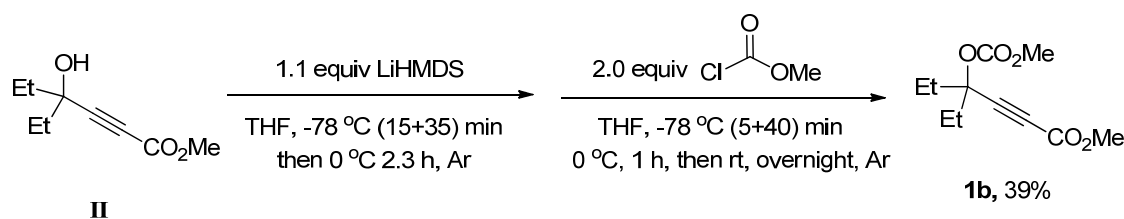

Following **Typical Procedure II**, the reaction of **II** (2.0367 g, 12.0 mmol), LiHMDS (13.2 mL, 1.0 M in THF, 13.2 mmol), and methyl chloroformate (1.9 mL,  $d = 1.223 \text{ g/mL}$ , 2.324 g, 24.0 mmol) in freshly distilled THF (15 mL) afforded **1b** (1.0822 g, 39%) [eluent: petroleum ether (~100 mL) to petroleum ether/ethyl acetate = 100/1 (~100 mL) to petroleum ether/ethyl acetate = 100/3 (~100 mL) to petroleum ether/ethyl acetate = 20/1 (~100 mL) to petroleum ether/ethyl acetate = 50/3 (~200 mL) to petroleum ether/ethyl acetate = 40/3 (~200 mL)]: oil;  **$^1H$  NMR** (400 MHz,  $CDCl_3$ ):  $\delta = 3.78$  (s, 6 H, 2 x  $OCH_3$ ), 2.12-1.92 (m, 4 H, 2 x  $CH_2$ ), 1.02 (t,  $J = 7.4 \text{ Hz}$ , 6 H, 2 x  $CH_3$ );  **$^{13}C$  NMR** (100 MHz,  $CDCl_3$ ):  $\delta = 153.6, 153.3, 85.8, 80.3, 78.0, 54.6, 52.7, 30.2, 8.0$ ; **IR** (neat):  $\nu = 2979, 2235, 1753, 1716, 1437, 1234, 1149, 1124, 1050 \text{ cm}^{-1}$ ; **MS** (ESI)  $m/z$ : 251 ( $M+Na^+$ ); **HRMS** calcd for  $C_{11}H_{16}O_5$  [ $M^+$ ]: 228.0998; found 228.0999.

**(3) Preparation of methyl 4-((methoxycarbonyl)oxy)-4,5,5-trimethyl-2-hexynoate (1c)**  
(yy-01-026)

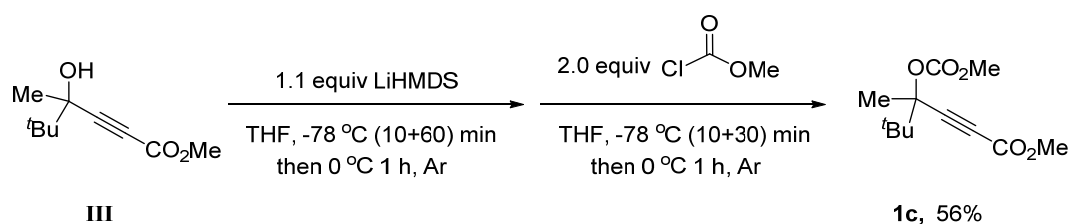

Following **Typical Procedure II**, the reaction of **III** (2.1820 g, 11.8 mmol), LiHMDS (13.0 mL, 13.0 mmol, 1.0 M in THF), and methyl chloroformate (1.8 mL, d = 1.223 g/mL, 2.201 g, 23.6 mmol) in freshly distilled THF (15 mL) afforded **1c** (1.6 g, 56%) [eluent: petroleum ether/ethyl acetate = 20/1 (~100 mL) to petroleum ether/ethyl acetate = 10/1 (~200 mL)]: oil; **<sup>1</sup>H NMR** (400 MHz, CDCl<sub>3</sub>): δ = 3.78 (s, 6 H, 2 x OCH<sub>3</sub>), 1.74 (s, 3 H, CH<sub>3</sub>), 1.11 (s, 9 H, <sup>t</sup>Bu); **<sup>13</sup>C NMR** (100 MHz, CDCl<sub>3</sub>): δ = 153.6, 153.5, 86.2, 81.8, 77.9, 54.5, 52.7, 39.3, 24.9, 20.0; **IR** (neat): ν = 2960, 2238, 1754, 1715, 1437, 1373, 1251, 1233, 1127, 1068, 1024, 1004 cm<sup>-1</sup>; **MS** (ESI) m/z: 265 (M+Na<sup>+</sup>), 260 (M+NH<sub>4</sub><sup>+</sup>); **HRMS** calcd for C<sub>12</sub>H<sub>18</sub>O<sub>5</sub> [M<sup>+</sup>]: 242.1154; found 242.1155.

#### (4) Preparation of methyl 3-(1-((methoxycarbonyl)oxy)cyclohexyl)propiolate (**1d**)

(yy-01-030)

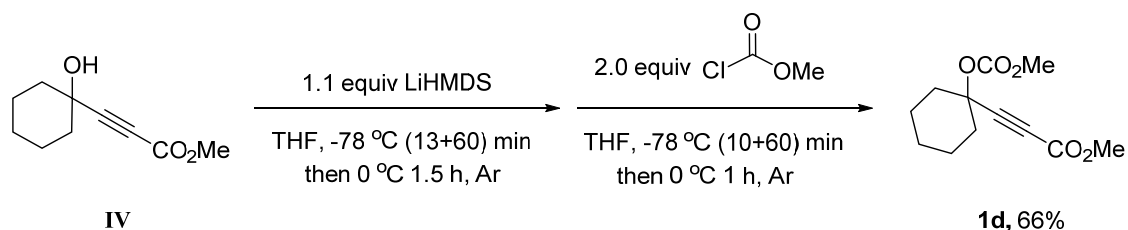

Following **Typical Procedure II**, the reaction of **IV** (2.5230 g, 13.8 mmol), LiHMDS (15.2 mL, 15.2 mmol, 1.0 M in THF), and methyl chloroformate (2.1 mL, d = 1.223 g/mL, 2.568 g, 27.6 mmol) in freshly distilled THF (15 mL) afforded **1d** (2.2068 g, 66%) [eluent: petroleum ether/ethyl acetate = 50/1 (~100 mL) to petroleum ether/ethyl acetate = 20/1 (~100 mL) ] to petroleum ether/ethyl acetate = 100/7 (~100 mL) to petroleum ether/ethyl acetate = 10/1 (~110 mL)]: oil; **<sup>1</sup>H NMR** (400 MHz, CDCl<sub>3</sub>): δ = 3.79 (s, 3 H, OCH<sub>3</sub>), 3.78 (s, 3 H, OCH<sub>3</sub>), 2.35-2.14 (m, 2 H, CH<sub>2</sub>), 1.98-1.87 (m, 2 H, CH<sub>2</sub>), 1.75-1.50 (m, 5 H, 2 x CH<sub>2</sub> and one proton of CH<sub>2</sub>), 1.43-1.31 (m, 1 H, one proton of CH<sub>2</sub>); **<sup>13</sup>C NMR** (100 MHz, CDCl<sub>3</sub>): δ = 153.5, 153.0, 86.0, 77.9, 76.2, 54.5, 52.6, 36.0, 24.6, 22.1; **IR** (neat): ν = 2940, 2863, 2234, 1752, 1715, 1437, 1275, 1230, 1118, 1017 cm<sup>-1</sup>; **MS** (ESI) m/z: 263 (M+Na<sup>+</sup>); **HRMS** calcd for C<sub>12</sub>H<sub>16</sub>O<sub>5</sub> [M<sup>+</sup>]: 240.0998; found 240.0996.

(5) Preparation of methyl

6,6-dimethoxy-4-((methoxycarbonyl)oxy)-4-methyl-2-hexynoate (**1e**) (yy-01-035)

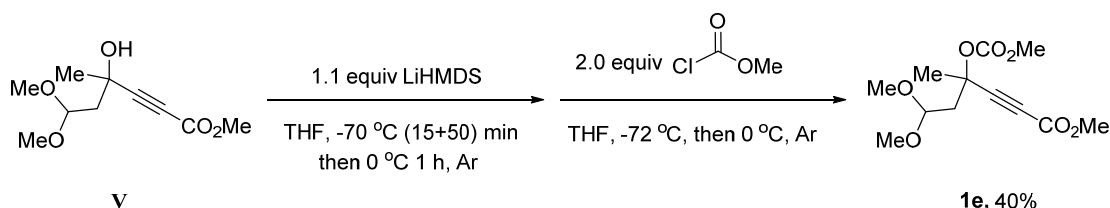

Following **Typical Procedure II**, the reaction of **V** (1.8775 g, 8.7 mmol), LiHMDS (9.6 mL, 1.0 M in THF, 9.6 mmol), and methyl chloroformate (1.3 mL,  $d = 1.223$  g/mL, 1.590 g, 17.4 mmol) in freshly distilled THF (15 mL) afforded **1e** (0.9467 g, 40%) [eluent: petroleum ether/ethyl acetate = 5/1 (~120 mL) to petroleum ether/ethyl acetate = 20/3 (~110 mL) ] to petroleum ether/ethyl acetate = 10/1 (~220 mL) to petroleum ether/ethyl acetate = 5/1 (~240 mL)]; oil;  $^1\text{H NMR}$  (400 MHz,  $\text{CDCl}_3$ ):  $\delta = 4.65$  (t,  $J = 5.0$  Hz, 1 H, CH), 3.79 (s, 3 H, OMe), 3.78 (s, 3 H, OMe), 3.43-3.29 (m, 6 H, 2 x OMe), 2.38-2.24 (m, 2 H,  $\text{CH}_2$ ), 1.78 (s, 3 H,  $\text{CH}_3$ );  $^{13}\text{C NMR}$  (100 MHz,  $\text{CDCl}_3$ ):  $\delta = 153.4, 153.1, 101.0, 85.6, 77.27, 73.8, 54.6, 53.2, 52.8, 52.7, 42.7, 26.3$ ; **IR** (neat):  $\nu = 2957, 2835, 2241, 1754, 1716, 1437, 1376, 1239, 1111, 1085, 1059$   $\text{cm}^{-1}$ ; **MS** (ESI)  $m/z$ : 297 ( $\text{M}+\text{Na}^+$ ), 292 ( $\text{M}+\text{NH}_4^+$ ). **HRMS** calcd for  $\text{C}_{12}\text{H}_{18}\text{O}_7$  [ $\text{M}^+$ ]: 274.1053; found 274.1056.

(6) Preparation of methyl 4-((methoxycarbonyl)oxy)-4-methyloct-7-en-2-ynoate

(**1f**) (yy-01-036)

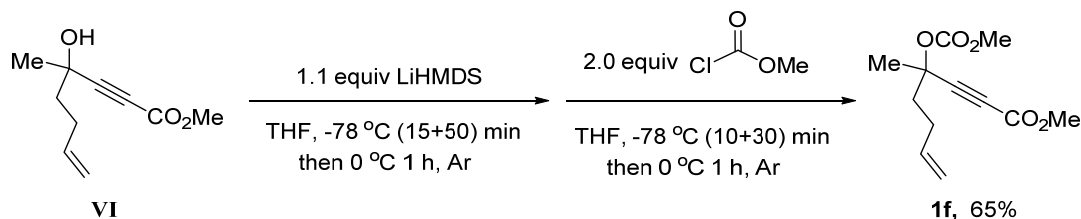

Following **Typical Procedure II**, the reaction of **VI** (2.0028 g, 11.0 mmol), LiHMDS (12.1 mL, 1.0 M in THF, 12.1 mmol), and methyl chloroformate (1.7 mL,  $d = 1.223$  g/mL, 2.079 g, 22.0 mmol) in freshly distilled THF (15 mL) afforded **1f**

(1.7256 g, 65%) [eluent: petroleum ether/ethyl acetate = 5/1 (~240 mL) to petroleum ether/ethyl acetate = 100/13 (~110 mL) ] to petroleum ether/ethyl acetate = 10/1 (~220 mL)]; oil; **<sup>1</sup>H NMR** (400 MHz, CDCl<sub>3</sub>): δ = 5.88-5.74 (m, 1 H, =CH), 5.12-5.03 (m, 1 H, one proton of =CH<sub>2</sub>), 5.03-4.96 (m, 1 H, one proton of =CH<sub>2</sub>), 3.79 (s, 3 H, OCH<sub>3</sub>), 3.78 (s, 3 H, OCH<sub>3</sub>), 2.40-2.19 (m, 2 H, CH<sub>2</sub>), 2.15-2.02 (m, 1 H, one proton of CH<sub>2</sub>), 2.02-1.90 (m, 1 H, one proton of CH<sub>2</sub>), 1.76 (s, 3 H, CH<sub>3</sub>); **<sup>13</sup>C NMR** (100 MHz, CDCl<sub>3</sub>): δ = 153.4, 153.2, 136.7, 115.3, 85.9, 77.2, 75.7, 54.6, 52.7, 40.0, 28.1, 25.6; **IR** (neat): ν = 2957, 2240, 1754, 1716, 1643, 1437, 1377, 1232, 1022 cm<sup>-1</sup>; **MS** (ESI) m/z: 263 (M+Na<sup>+</sup>), 258 (M+NH<sub>4</sub><sup>+</sup>); **HRMS** calcd for C<sub>12</sub>H<sub>16</sub>O<sub>5</sub> [M<sup>+</sup>]: 240.0998; found 240.0999.

### 3. Preparation of allenates

#### (1) Preparation of methyl 4-methyl-2-phenyl-2,3-heptadienoate (**3aa**) (yao-01-060)

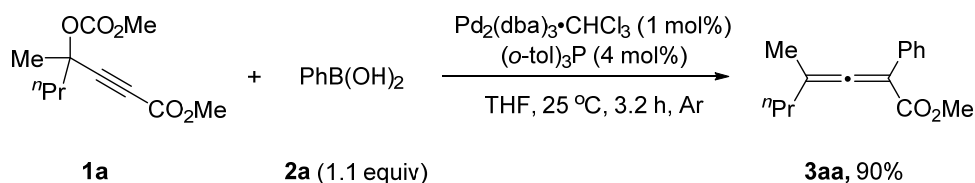

**Typical Procedure III:** To an oven-dried Schlenk tube were added **2a** (135.9 mg, 1.1 mmol), Pd<sub>2</sub>(dba)<sub>3</sub>·CHCl<sub>3</sub> (11.1 mg, 0.01 mmol), and tris(*o*-tolyl)phosphine (12.8 mg, 0.04 mmol). After replacing air with argon for three times at rt by vacuum, **1a** (231.5 mg, 1.0 mmol) and freshly distilled THF (2.0 mL) were added. The resulting mixture was stirred for 3.2 h at 25 °C as monitored by TLC and then filtered through a short pad of silica gel eluted with ethyl acetate (15 mL x 3). After removal of the solvent under vacuum, the residue was purified by flash column chromatography on silica gel to afford **3aa** (209.4 mg, 90%) [eluent: petroleum ether/ethyl acetate = 100/3 (~100 mL) to petroleum ether/ethyl acetate = 25/1 (~300 mL)]; oil; **<sup>1</sup>H NMR** (400 MHz, CDCl<sub>3</sub>): δ = 7.47 (d, *J* = 8.4 Hz, 2 H, Ar-H), 7.32 (t, *J* = 7.6 Hz, 2 H, Ar-H), 7.23 (t, *J* = 7.4 Hz, 1 H, Ar-H), 3.78 (s, 3 H, OCH<sub>3</sub>), 2.20-2.07 (m, 2 H, CH<sub>2</sub>), 1.87 (s,

3 H, CH<sub>3</sub>), 1.60-1.46 (m, 2 H, CH<sub>2</sub>), 0.93 (t,  $J$  = 7.2 Hz, 3 H, CH<sub>3</sub> of <sup>n</sup>Pr); <sup>13</sup>C NMR (100 MHz, CDCl<sub>3</sub>):  $\delta$  = 209.4, 167.3, 134.0, 128.3, 128.0, 127.1, 105.0, 101.8, 52.0, 35.7, 20.5, 17.9, 13.6; **IR** (neat):  $\nu$  = 2955, 1948, 1714, 1599, 1493, 1434, 1384, 1273, 1195, 1175, 1040, 1021 cm<sup>-1</sup>; **MS** (70 eV, EI)  $m/z$  (%): 231 ( $M^+$ +1, 5.71), 230 ( $M^+$ , 33.18), 128 (100); **HRMS** calcd for C<sub>15</sub>H<sub>18</sub>O<sub>2</sub> [ $M^+$ ]: 230.1307; found 230.1303.

## (2) Preparation of methyl 4-ethyl-2-(4-methoxyphenyl)-2,3-hexadienoate (**3bb**)

(yy-01-045)

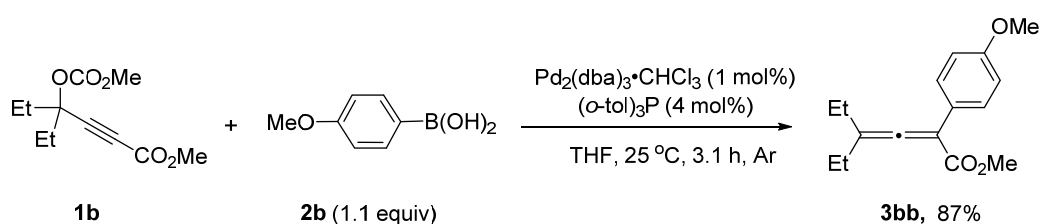

Following **Typical Procedure III**, the reaction of Pd<sub>2</sub>(dba)<sub>3</sub>·CHCl<sub>3</sub> (10.4 mg, 0.01 mmol), tris(*o*-tolyl)phosphine (12.4 mg, 0.04 mmol), **2b** (170.6 mg, 1.1 mmol), and **1b** (226.8 mg, 1.0 mmol) in freshly distilled THF (2.0 mL) afforded **3bb** (225.9 mg, 87%) [eluent: petroleum ether/ethyl acetate = 40/1 (~100 mL) to petroleum ether/ethyl acetate = 50/1 (~200 mL)]: oil; <sup>1</sup>H NMR (400 MHz, CDCl<sub>3</sub>):  $\delta$  = 7.43 (d,  $J$  = 8.8 Hz, 2 H, Ar-H), 6.87 (d,  $J$  = 8.8 Hz, Ar-H), 3.80 (s, 3 H, OCH<sub>3</sub>), 3.78 (s, 3 H, OCH<sub>3</sub>), 2.17 (q,  $J$  = 7.2 Hz, 4 H, 2 x CH<sub>2</sub>), 1.09 (t,  $J$  = 7.4 Hz, 6 H, 2 x CH<sub>3</sub>); <sup>13</sup>C NMR (100 MHz, CDCl<sub>3</sub>):  $\delta$  = 208.2, 167.8, 158.8, 129.2, 126.4, 113.6, 113.5, 103.9, 55.2, 52.0, 25.7, 12.1; **IR** (neat):  $\nu$  = 2966, 1942, 1713, 1607, 1510, 1434, 1375, 1245, 1196, 1169, 1025 cm<sup>-1</sup>; **MS** (70 eV, EI)  $m/z$  (%): 261 ( $M^+$ +1, 14.98), 260 ( $M^+$ , 84.66), 201 (100); **HRMS** calcd for C<sub>16</sub>H<sub>20</sub>O<sub>3</sub> [ $M^+$ ]: 260.1412; found 260.1411.

## (3) Preparation of methyl 4-ethyl-2-(3-methoxyphenyl)-2,3-hexadienoate (**3bc**)

(yao-01-050)

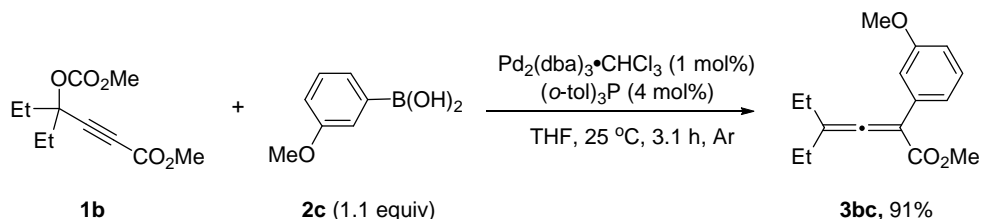

Following **Typical Procedure III**, the reaction of  $\text{Pd}_2(\text{dba})_3 \cdot \text{CHCl}_3$  (10.4 mg, 0.01 mmol), tris(*o*-tolyl)phosphine (12.2 mg, 0.04 mmol), **2c** (171.5 mg, 1.1 mmol), and **1b** (227.6 mg, 1.0 mmol) in freshly distilled THF (2.0 mL) afforded **3bc** (235.4 mg, 91%) [eluent: petroleum ether (100 mL) to petroleum ether/ethyl acetate = 50/1 (~100 mL) to petroleum ether/ethyl acetate = 25/1 (~200 mL)]: oil;  $^1\text{H NMR}$  (400 MHz,  $\text{CDCl}_3$ ):  $\delta$  = 7.27-7.18 (m, 1 H, Ar-H), 7.13-7.05 (m, 2 H, Ar-H), 6.82-6.77 (m, 1 H, Ar-H), 3.80 (s, 3 H,  $\text{OCH}_3$ ), 3.78 (s, 3 H,  $\text{OCH}_3$ ), 2.18 (q,  $J$  = 7.5 Hz, 4 H, 2 x  $\text{CH}_2$ ), 1.09 (t,  $J$  = 7.4 Hz, 6 H, 2 x  $\text{CH}_3$ );  $^{13}\text{C NMR}$  (100 MHz,  $\text{CDCl}_3$ ):  $\delta$  = 208.6, 167.4, 159.3, 135.4, 129.0, 120.6, 113.8, 112.6, 104.3, 55.1, 52.0, 25.6, 12.0; **IR** (neat):  $\nu$  = 2966, 1942, 1715, 1598, 1579, 1488, 1455, 1432, 1277, 1227, 1190, 1152, 1030  $\text{cm}^{-1}$ ; **MS** (70 eV, EI)  $m/z$  (%): 261 ( $\text{M}^+ + 1$ , 17.66), 260 ( $\text{M}^+$ , 100); **HRMS** calcd for  $\text{C}_{16}\text{H}_{20}\text{O}_3$  [ $\text{M}^+$ ]: 260.1412; found 260.1408.

#### (4) Preparation of methyl 4-ethyl-2-(2-methoxyphenyl)-2,3-hexadienoate (**3bd**) (yao-01-122)

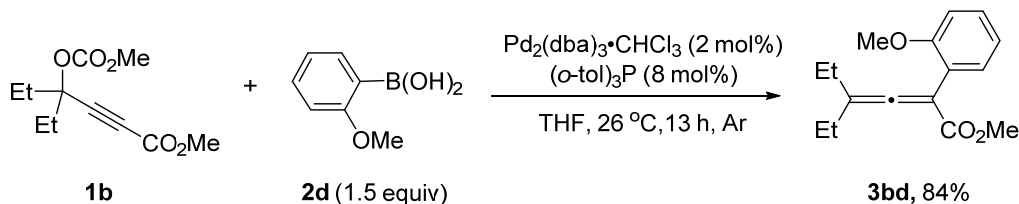

Following **Typical Procedure III**, the reaction of  $\text{Pd}_2(\text{dba})_3 \cdot \text{CHCl}_3$  (20.9 mg, 0.02 mmol), tris(*o*-tolyl)phosphine (24.5 mg, 0.08 mmol), **2d** (229.0 mg, 1.5 mmol), and **1b** (225.1 mg, 1.0 mmol) in freshly distilled THF (2.0 mL) afforded **3bd** (215.7 mg, 84%) [eluent: petroleum ether/ethyl acetate = 100/3 (~100 mL) to petroleum ether/ethyl acetate = 25/1 (~200 mL) to petroleum ether/ethyl acetate = 50/3 (~200 mL) to petroleum ether/ethyl acetate = 25/2 (~100 mL)]: solid; **m.p.** 45.5-46.3  $^\circ\text{C}$

(petroleum ether/ethyl ether); **<sup>1</sup>H NMR** (400 MHz, CDCl<sub>3</sub>): δ = 7.32-7.25 (m, 1 H, Ar-H), 7.21 (dd, *J*<sub>1</sub> = 7.6 Hz, *J*<sub>2</sub> = 2.0 Hz, 1 H, Ar-H), 6.97-6.87 (m, 2 H, Ar-H), 3.80 (s, 3 H, OCH<sub>3</sub>), 3.74 (s, 3 H, OCH<sub>3</sub>), 2.21-2.04 (m, 4 H, 2 x CH<sub>2</sub>), 1.10 (t, *J* = 7.4 Hz, 6 H, 2 x CH<sub>3</sub>); **<sup>13</sup>C NMR** (100 MHz, CDCl<sub>3</sub>): δ = 207.7, 167.8, 157.0, 130.6, 129.0, 124.4, 120.4, 112.4, 111.1, 101.7, 55.6, 52.0, 25.5, 12.0; **IR** (neat): ν = 2967, 1956, 1718, 1597, 1492, 1451, 1433, 1259, 1194, 1170, 1112, 1080, 1048, 1030, 1019 cm<sup>-1</sup>; **MS** (70 eV, EI) *m/z* (%): 261 (*M*<sup>+</sup>+1, 10.68), 260 (*M*<sup>+</sup>, 62.34), 245 (100); Anal. Calcd. for C<sub>16</sub>H<sub>20</sub>O<sub>3</sub>: C 73.82, H 7.74; found C 73.33, H 7.62.

**The reaction of 1b with 2d under the standard conditions (yao-01-051)**

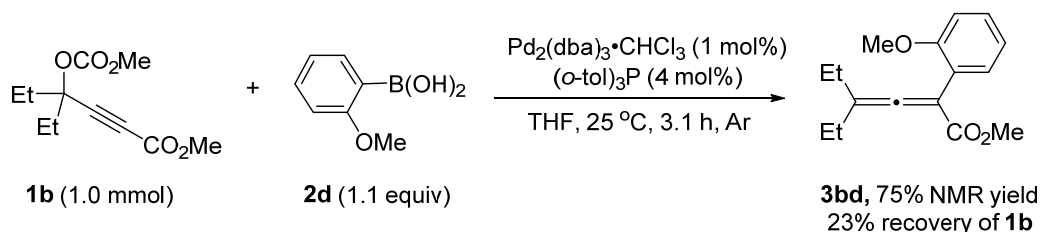

Following **Typical Procedure III**, the reaction of Pd<sub>2</sub>(dba)<sub>3</sub>·CHCl<sub>3</sub> (10.9 mg, 0.01 mmol), tris(*o*-tolyl)phosphine (13.3 mg, 0.04 mmol), **2d** (168.0 mg, 1.1 mmol), and **1b** (229.5 mg, 1.0 mmol) in freshly distilled THF (2.0 mL) afforded a crude product. 75% NMR yield of **3bd** and 23% recovered of **1b** were determined by the NMR spectrum of the crude product with CH<sub>2</sub>Br<sub>2</sub> (17.5 μL) as the internal standard.

**(5) Preparation of methyl 2-(4-hydroxyphenyl)-4-methyl-2,3-heptadienoate (3ae)**  
**(yao-01-109)**

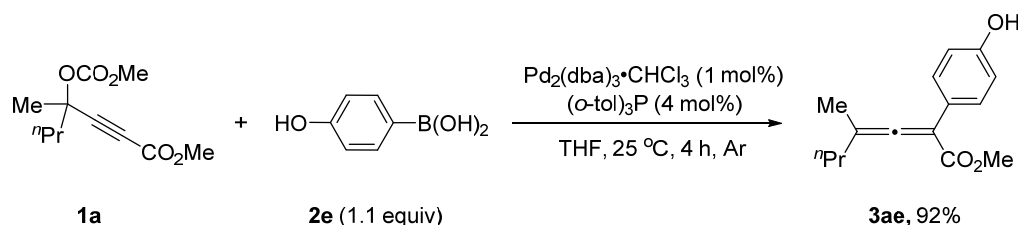

Following **Typical Procedure III**, the reaction of Pd<sub>2</sub>(dba)<sub>3</sub>·CHCl<sub>3</sub> (10.6 mg, 0.01 mmol), tris(*o*-tolyl)phosphine (13.0 mg, 0.04 mmol), **2e** (155.1 mg, 1.1 mmol), and **1a** (223.4 mg, 1.0 mmol) in freshly distilled THF (2.0 mL) afforded **3ae** (220.9 mg, 92%) [eluent: petroleum ether/ethyl acetate = 50/1 (~100 mL) to petroleum ether/ethyl

acetate = 100/3 (~100 mL) to petroleum ether/ethyl acetate = 25/1 (~100 mL) to petroleum ether/ethyl acetate = 50/3 (~100 mL) to petroleum ether/ethyl acetate = 10/1 (~100 mL) to petroleum ether/ethyl acetate = 5/1 (~200 mL) ]: solid; **m.p.** 83.2-84.2 °C (petroleum ether/CH<sub>2</sub>Cl<sub>2</sub>); **<sup>1</sup>H NMR** (400 MHz, CD<sub>3</sub>OD): δ = 7.25 (d, *J* = 9.2 Hz, 2 H, Ar-H), 6.73 (d, *J* = 8.8 Hz, 2 H, Ar-H), 4.85 (s, 1 H, OH), 3.74 (s, 3 H, OCH<sub>3</sub>), 2.20-2.05 (m, 2 H, CH<sub>2</sub>), 1.84 (s, 3 H, CH<sub>3</sub>), 1.52 (sextet, *J* = 7.4 Hz, 2 H, CH<sub>2</sub>), 0.92 (t, *J* = 7.4 Hz, 3 H, CH<sub>3</sub> of *n*Pr); **<sup>13</sup>C NMR** (100 MHz, CD<sub>3</sub>OD): δ = 209.9, 169.4, 157.9, 130.5, 126.0, 115.9, 105.9, 102.8, 52.5, 36.7, 21.5, 18.2, 14.0; **IR** (neat): ν = 3348, 2946, 1944, 1683, 1612, 1515, 1435, 1387, 1266, 1212, 1173, 1105, 1084, 1023 cm<sup>-1</sup>; **MS** (EI) *m/z* (%): 247 (M<sup>+</sup>+1, 5.73), 246 (M<sup>+</sup>, 32.20), 187 (100); Anal. Calcd. for C<sub>15</sub>H<sub>18</sub>O<sub>3</sub>: C 73.15, H 7.37; found C 73.13, H 7.33.

**(6) Preparation of methyl 4-methyl-2-(3-nitrophenyl)- 2,3-heptadienoate (3af)**  
(yao-01-059)

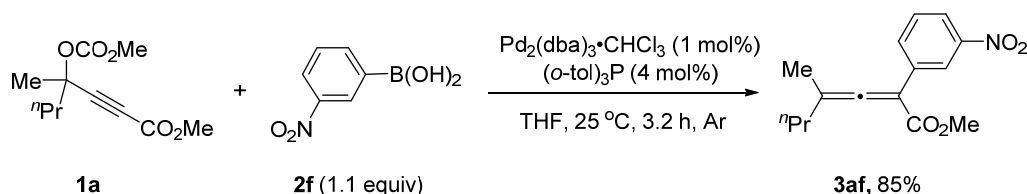

Following **Typical Procedure III**, the reaction of Pd<sub>2</sub>(dba)<sub>3</sub>·CHCl<sub>3</sub> (10.8 mg, 0.01 mmol), tris(*o*-tolyl)phosphine (12.7 mg, 0.04 mmol), **2f** (189.0 mg, 1.1 mmol), and **1a** (228.6 mg, 1.0 mmol) in freshly distilled THF (2.0 mL) afforded **3af** (235.0 mg, 85%) [eluent: petroleum ether/ethyl acetate = 100/3 (~100 mL) to petroleum ether/ethyl acetate = 25/1 (~200 mL) to petroleum ether/ethyl acetate = 20/1 (~100 mL)]: oil; **<sup>1</sup>H NMR** (400 MHz, CDCl<sub>3</sub>): δ = 8.37 (t, *J* = 2.0 Hz, 1 H, Ar-H), 8.12-8.06 (m, 1 H, Ar-H), 7.85 (dt *J*<sub>1</sub> = 8.0 Hz, *J*<sub>2</sub> = 1.4 Hz, 1 H, Ar-H), 7.49 (t, *J* = 8.0 Hz, 1 H, Ar-H), 3.82 (s, 3 H, OCH<sub>3</sub>), 2.26-2.13 (m, 2 H, CH<sub>2</sub>), 1.92 (s, 3 H, CH<sub>3</sub>), 1.62-1.48 (m, 2 H, CH<sub>2</sub>), 0.95 (t, *J* = 7.2 Hz, 3 H, CH<sub>3</sub> of *n*Pr); **<sup>13</sup>C NMR** (100 MHz, CDCl<sub>3</sub>): δ = 210.0, 166.6, 148.1, 136.0, 134.2, 128.9, 123.2, 121.9, 106.7, 100.1, 52.2, 35.6, 20.4, 17.8, 13.6; **IR** (neat): ν = 2955, 1945, 1714, 1527, 1434, 1347, 1269, 1198, 1097, 1035 cm<sup>-1</sup>;

**MS** (70 eV, EI) *m/z* (%): 275 ( $M^+$ , 7.52), 246 (100); **HRMS** calcd for  $C_{15}H_{17}NO_4$  [ $M^+$ ]: 275.1158; found 275.1161.

(7) Preparation of methyl 2-(3-methoxycarbonylphenyl)-4-methyl-2,3-heptadienoate (**3ag**) (yz-cfsy-186, yao-01-110)

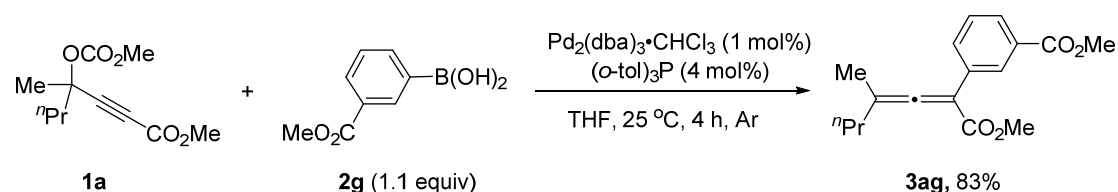

Following **Typical Procedure III**, the reaction of  $\text{Pd}_2(\text{dba})_3 \cdot \text{CHCl}_3$  (10.5 mg, 0.01 mmol), tris(*o*-tolyl)phosphine (12.4 mg, 0.04 mmol), **2g** (205.1 mg, 1.1 mmol), and **1a** (229.0 mg, 1.0 mmol) in freshly distilled THF (2.0 mL) afforded **3ag** (239.4 mg, 83%) [eluent: petroleum ether (~200 mL) to petroleum ether/ethyl acetate = 20/1 (~300 mL)]: oil; **<sup>1</sup>H NMR** (400 MHz,  $\text{CDCl}_3$ ):  $\delta$  = 8.14 (s, 1 H, Ar-H), 7.93 (d, 1 H,  $J$  = 8.0 Hz, Ar-H), 7.68 (d,  $J_1$  = 8.0 Hz, 1 H, Ar-H), 7.40 (t,  $J$  = 7.8 Hz, 1 H, Ar-H), 3.91 (s, 3 H,  $\text{OCH}_3$ ), 3.80 (s, 3 H,  $\text{OCH}_3$ ), 2.23-2.10 (m, 2 H,  $\text{CH}_2$ ), 1.89 (s, 3 H,  $\text{CH}_3$ ), 1.61-1.47 (m, 2 H,  $\text{CH}_2$ ), 0.94 (t,  $J$  = 7.6 Hz, 3 H,  $\text{CH}_3$  of  $n\text{Pr}$ ); **<sup>13</sup>C NMR** (100 MHz,  $\text{CDCl}_3$ ):  $\delta$  = 209.7, 167.1, 167.0, 134.5, 132.8, 130.1, 129.5, 128.3, 128.1, 105.6, 101.1, 52.11, 52.05, 35.7, 20.4, 17.9, 13.6; **IR** (neat):  $\nu$  = 2953, 1945, 1714, 1602, 1583, 1435, 1288, 1257, 1194, 1170, 1108, 1037  $\text{cm}^{-1}$ ; **MS** (EI) *m/z* (%): 289 ( $M^+ + 1$ , 5.41), 288 ( $M^+$ , 27.90), 169 (100); **HRMS** calcd for  $C_{17}H_{20}O_4$  [ $M^+$ ]: 288.1362; found 288.1367.

(8) Preparation of methyl 2-(4-formylphenyl)-4-methyl-2,3-heptadienoate (**3ah**) (yao-01-105)

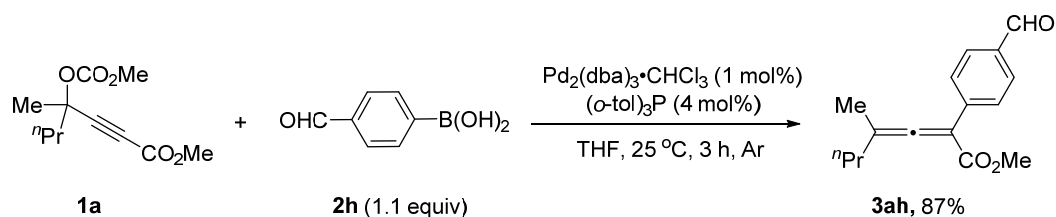

Following **Typical Procedure III**, the reaction of  $\text{Pd}_2(\text{dba})_3 \cdot \text{CHCl}_3$  (11.0 mg, 0.01 mmol), tris(*o*-tolyl)phosphine (12.6 mg, 0.04 mmol), **2h** (169.6 mg, 1.1 mmol), and **1a** (223.2 mg, 1.0 mmol) in freshly distilled THF (2.0 mL) afforded **3ah** (220.7 mg, 87%) [eluent: petroleum ether (~100 mL) to petroleum ether/ethyl acetate = 50/1 (~200 mL) to petroleum ether/ethyl acetate = 100/3 (~200 mL) to petroleum ether/ethyl acetate = 25/1 (~200 mL) to petroleum ether/ethyl acetate = 50/3 (~100 mL) to petroleum ether/ethyl acetate = 25/2 (~100 mL) to petroleum ether/ethyl acetate = 8/1 (~90 mL)]: oil; **<sup>1</sup>H NMR** (400 MHz,  $\text{CDCl}_3$ ):  $\delta$  = 9.99 (s, 1 H, CHO), 7.83 (d,  $J$  = 8.0 Hz, 2 H, Ar-H), 7.68 (d,  $J$  = 8.8 Hz, 2 H, Ar-H), 3.81 (s, 3 H,  $\text{OCH}_3$ ), 2.24-2.11 (m, 2 H,  $\text{CH}_2$ ), 1.91 (s, 3 H,  $\text{CH}_3$ ), 1.62-1.46 (m, 2 H,  $\text{CH}_2$ ), 0.94 (t,  $J$  = 7.4 Hz, 3 H,  $\text{CH}_3$  of  $n\text{Pr}$ ); **<sup>13</sup>C NMR** (100 MHz,  $\text{CDCl}_3$ ):  $\delta$  = 210.4, 191.8, 166.7, 140.4, 134.9, 129.5, 128.7, 106.1, 101.2, 52.1, 35.6, 20.4, 17.7, 13.6; **IR** (neat):  $\nu$  = 2956, 1943, 1714, 1699, 1602, 1569, 1434, 1381, 1277, 1196, 1180  $\text{cm}^{-1}$ ; **MS** (EI)  $m/z$  (%): 259 ( $\text{M}^+ + 1$ , 3.97), 258 ( $\text{M}^+$ , 22.16), 128 (100); **HRMS** calcd for  $\text{C}_{16}\text{H}_{18}\text{O}_3$  [ $\text{M}^+$ ]: 258.1256; found 258.1253.

**(9) Preparation of methyl 2-(4-fluorophenyl)-4-methyl-2,3-heptadienoate (3ai)**  
**(yao-01-104)**

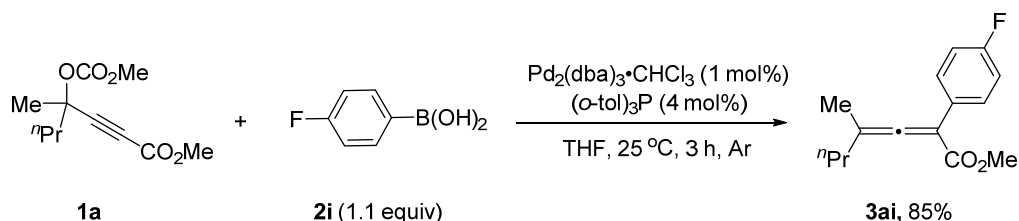

Following **Typical Procedure III**, the reaction of  $\text{Pd}_2(\text{dba})_3 \cdot \text{CHCl}_3$  (11.0 mg, 0.01 mmol), tris(*o*-tolyl)phosphine (12.7 mg, 0.04 mmol), **2i** (154.9 mg, 1.1 mmol), and **1a**

(228.0 mg, 1.0 mmol) in freshly distilled THF (2.0 mL) afforded **3ai** (210.6 mg, 85%) [eluent: petroleum ether (~100 mL) to petroleum ether/ethyl acetate = 50/1 (~100 mL) to petroleum ether/ethyl acetate = 100/3 (~100 mL) to petroleum ether/ethyl acetate = 25/1 (~100 mL)]: oil; **<sup>1</sup>H NMR** (400 MHz, CDCl<sub>3</sub>): δ = 7.48-7.42 (m, 2 H, Ar-H), 7.05-6.97 (m, 2 H, Ar-H), 3.78 (s, 3 H, OCH<sub>3</sub>), 2.21-2.08 (m, 2 H, CH<sub>2</sub>), 1.87 (s, 3 H, CH<sub>3</sub>), 1.60-1.45 (m, 2 H, CH<sub>2</sub>), 0.93 (t, *J* = 7.4 Hz, 3 H, CH<sub>3</sub> of <sup>*n*</sup>Pr); **<sup>13</sup>C NMR** (100 MHz, CDCl<sub>3</sub>): δ = 209.3, 167.3, 162.0 (d, *J* = 245.2 Hz), 130.0 (d, *J* = 8.4 Hz), 114.9 (d, *J* = 21.2 Hz), 105.2, 100.9, 52.0, 35.7, 20.5, 17.9, 13.6; **<sup>19</sup>F NMR** (376 MHz, CDCl<sub>3</sub>): δ = -115.7- (-115.9) (m); **IR** (neat): ν = 2956, 1948, 1714, 1601, 1508, 1435, 1277, 1222, 1195, 1159 cm<sup>-1</sup>; **MS** (70 eV, EI) *m/z* (%): 249 (*M*<sup>+</sup>+1, 5.92), 248 (*M*<sup>+</sup>, 34.37), 146 (100); **HRMS** calcd for C<sub>15</sub>H<sub>17</sub>O<sub>2</sub>F [*M*<sup>+</sup>]: 248.1213; found 248.1216.

## (10) Preparation of methyl

### 4-methyl-2-(4-trifluoromethylphenyl)-2,3-heptadienoate (**3aj**) (yao-01-106)

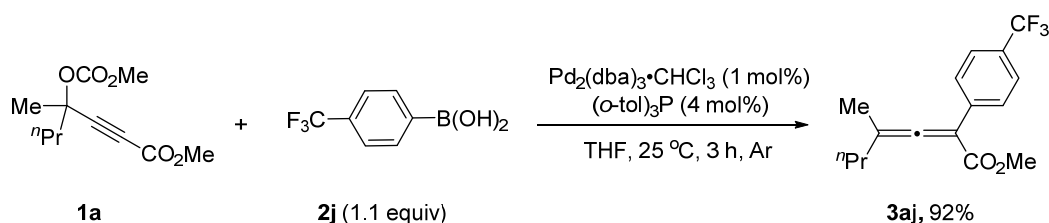

Following **Typical Procedure III**, the reaction of Pd<sub>2</sub>(dba)<sub>3</sub>·CHCl<sub>3</sub> (11.0 mg, 0.01 mmol), tris(*o*-tolyl)phosphine (12.5 mg, 0.04 mmol), **2j** (214.8 mg, 1.1 mmol), and **1a** (224.3 mg, 1.0 mmol) in freshly distilled THF (2.0 mL) afforded **3aj** (269.8 mg, 92%) [eluent: petroleum ether (~100 mL) to petroleum ether/ethyl acetate = 50/1 (~100 mL) to petroleum ether/ethyl acetate = 100/3 (~100 mL) to petroleum ether/ethyl acetate = 25/1 (~100 mL)]: oil; **<sup>1</sup>H NMR** (400 MHz, CDCl<sub>3</sub>): δ = 7.62 (d, *J* = 8.8 Hz, 2 H, Ar-H), 7.57 (d, *J* = 8.4 Hz, 2 H, Ar-H), 3.80 (s, 3 H, OCH<sub>3</sub>), 2.16 (t, *J* = 7.6 Hz, 2 H, CH<sub>2</sub>), 1.89 (s, 3 H, CH<sub>3</sub>), 1.61-1.47 (m, 2 H, CH<sub>2</sub>), 0.94 (t, *J* = 7.4 Hz, 3 H, CH<sub>3</sub> of <sup>*n*</sup>Pr); **<sup>13</sup>C NMR** (100 MHz, CDCl<sub>3</sub>): δ = 210.1, 166.8, 137.9, 129.1 (q, *J* = 32.3 Hz), 128.5, 125.0 (q, *J* = 3.5 Hz), 124.2 (q, *J* = 270.5 Hz), 106.0, 100.9, 52.1, 35.6, 20.4, 17.8, 13.6; **<sup>19</sup>F NMR** (376 MHz, CDCl<sub>3</sub>): δ = -63.0; **IR** (neat): ν = 2958, 1946, 1717,

1616, 1436, 1323, 1277, 1200, 1163, 1121, 1068, 1016  $\text{cm}^{-1}$ ; **MS** (EI)  $m/z$  (%): 299 ( $M^++1$ , 5.83), 298 ( $M^+$ , 30.37), 269 (100); **HRMS** calcd for  $\text{C}_{16}\text{H}_{17}\text{O}_2\text{F}_3$  [ $M^+$ ]: 298.1181; found 298.1188.

# **(11) Preparation of methyl 4-methyl-2-(2-naphthyl)-2,3-heptadienoate (3ak)**

**(yao-01-103)**

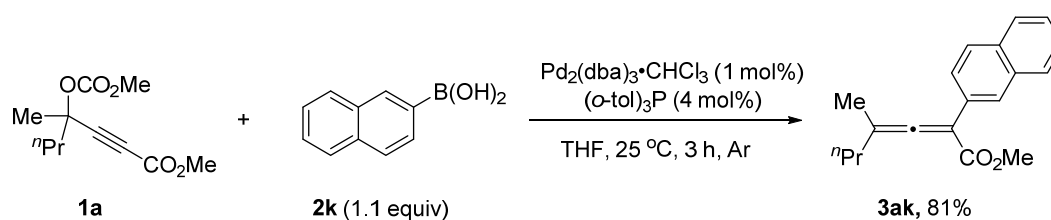

Following **Typical Procedure III**, the reaction of  $\text{Pd}_2(\text{dba})_3 \cdot \text{CHCl}_3$  (11.2 mg, 0.01 mmol), tris(*o*-tolyl)phosphine (12.6 mg, 0.04 mmol), **2k** (195.6 mg, 1.1 mmol), and **1a** (222.7 mg, 1.0 mmol) in freshly distilled THF (2.0 mL) afforded **3ak** (234.6 mg, 81%, purity = 94%) [eluent: petroleum ether (~100 mL) to petroleum ether/ethyl acetate = 50/1 (~100 mL) to petroleum ether/ethyl acetate = 100/3 (~100 mL) to petroleum ether/ethyl acetate = 25/1 (~100 mL)]: oil;  **$^1\text{H}$  NMR** (400 MHz,  $\text{CDCl}_3$ ):  $\delta$  = 8.05 (s, 1 H, Ar-H), 7.85-7.75 (m, 3 H, Ar-H), 7.52 (dd,  $J_1$  = 8.8 Hz,  $J_2$  = 1.6 Hz, 1 H, Ar-H), 7.48-7.40 (m, 2 H, Ar-H), 3.83 (s, 3 H,  $\text{OCH}_3$ ), 2.25-2.11 (m, 2 H,  $\text{CH}_2$ ), 1.91 (s, 3 H,  $\text{CH}_3$ ), 1.63-1.49 (m, 2 H,  $\text{CH}_2$ ), 0.95 (t,  $J$  = 7.2 Hz, 3 H,  $\text{CH}_3$  of  $n\text{Pr}$ );  **$^{13}\text{C}$  NMR** (100 MHz,  $\text{CDCl}_3$ ):  $\delta$  = 209.8, 167.4, 133.3, 132.5, 131.2, 128.2, 127.5, 127.4, 127.1, 126.4, 125.9, 125.8, 105.3, 101.9, 52.0, 35.7, 20.5, 18.0, 13.7; **IR** (neat):  $\nu$  = 2953, 1943, 1713, 1598, 1504, 1434, 1367, 1240, 1164, 1124, 1031  $\text{cm}^{-1}$ ; **MS** (70 eV, EI)  $m/z$  (%): 281 ( $M^++1$ , 20.60), 280 ( $M^+$ , 95.38), 178 (100); **HRMS** calcd for  $\text{C}_{19}\text{H}_{20}\text{O}_2$  [ $M^+$ ]: 280.1463; found 280.1467.

# **(12) Preparation of methyl 4-methyl-2-(2-thienyl)-2,3-heptadienoate (3al)**

**(yao-01-107)**

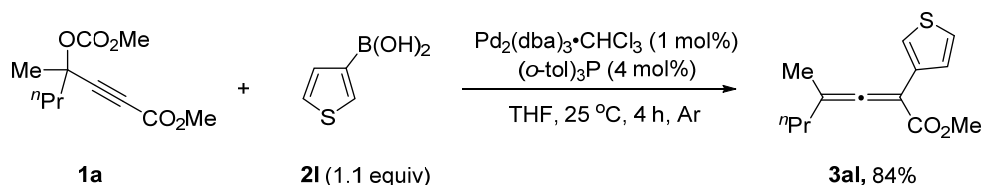

Following **Typical Procedure III**, the reaction of  $\text{Pd}_2(\text{dba})_3 \cdot \text{CHCl}_3$  (10.9 mg, 0.01 mmol), tris(*o*-tolyl)phosphine (13.0 mg, 0.04 mmol), **2l** (144.6 mg, 1.1 mmol), and **1a** (223.0 mg, 1.0 mmol) in freshly distilled THF (2.0 mL) afforded **3al** (193.5 mg, 84%) [eluent: petroleum ether (~100 mL) to petroleum ether/ethyl acetate = 50/1 (~100 mL) to petroleum ether/ethyl acetate = 100/3 (~100 mL) to petroleum ether/ethyl acetate = 25/1 (~100 mL)]: oil;  $^1\text{H NMR}$  (400 MHz,  $\text{CDCl}_3$ ):  $\delta$  = 7.71 (dd,  $J_1$  = 3.2 Hz,  $J_2$  = 1.2 Hz, 1 H, Ar-H), 7.22 (dd,  $J_1$  = 5.0 Hz,  $J_2$  = 3.0 Hz, 1 H, Ar-H), 7.11 (dd,  $J_1$  = 5.2 Hz,  $J_2$  = 1.2 Hz, 1 H, Ar-H), 3.78 (s, 3 H,  $\text{OCH}_3$ ), 2.14 (t,  $J$  = 7.4 Hz, 2 H,  $\text{CH}_2$ ), 1.86 (s, 3 H,  $\text{CH}_3$ ), 1.60-1.47 (m, 2 H,  $\text{CH}_2$ ), 0.94 (t,  $J$  = 7.2 Hz, 3 H,  $\text{CH}_3$  of  $n\text{Pr}$ );  $^{13}\text{C NMR}$  (100 MHz,  $\text{CDCl}_3$ ):  $\delta$  = 209.0, 167.2, 133.6, 127.6, 124.5, 122.4, 105.3, 97.6, 52.0, 35.8, 20.5, 17.9, 13.7; **IR** (neat):  $\nu$  = 2954, 1944, 1714, 1434, 1378, 1269, 1214, 1147, 1180, 1097, 1036  $\text{cm}^{-1}$ ; **MS** (70 eV, EI)  $m/z$  (%): 237 ( $\text{M}^+ + 1$ , 8.16), 236 ( $\text{M}^+$ , 52.10), 149 (100); **HRMS** calcd for  $\text{C}_{13}\text{H}_{16}\text{O}_2\text{S}$  [ $\text{M}^+$ ]: 236.0871; found 236.0870.

### (13) Preparation of methyl 2-(4-chlorophenyl)-4,5,5-trimethyl-2,3-hexadienoate (**3cm**) (yao-01-127)

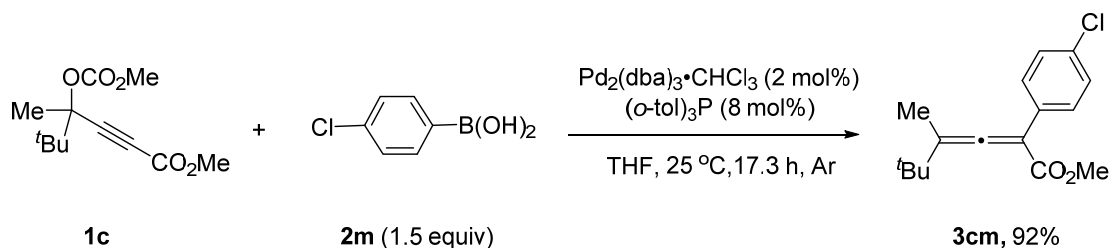

Following **Typical Procedure III**, the reaction of  $\text{Pd}_2(\text{dba})_3 \cdot \text{CHCl}_3$  (20.5 mg, 0.02 mmol), tris(*o*-tolyl)phosphine (24.6 mg, 0.08 mmol), **2m** (240.0 mg, 1.5 mmol), and **1c** (240.3 mg, 1.0 mmol) in freshly distilled THF (2.0 mL) afforded **3cm** (263.3 mg, 92%, purity = 97%) [eluent: petroleum ether (~100 mL) to petroleum ether/ethyl acetate = 50/1 (~100 mL) to petroleum ether/ethyl acetate = 100/3 (~100 mL) to petroleum ether/ethyl acetate = 25/1 (~200 mL)]: oil;  $^1\text{H NMR}$  (400 MHz,  $\text{CDCl}_3$ ):  $\delta$

= 7.45 (d,  $J$  = 8.4 Hz, 2 H, Ar-H), 7.29 (d,  $J$  = 8.8 Hz, 2 H, Ar-H), 3.78 (s, 3 H, OCH<sub>3</sub>), 1.87 (s, 3 H, CH<sub>3</sub>), 1.15 (s, 9 H, <sup>*t*</sup>Bu); <sup>13</sup>C NMR (100 MHz, CDCl<sub>3</sub>):  $\delta$  = 208.7, 167.3, 132.8, 132.5, 129.3, 128.3, 114.4, 101.0, 52.1, 34.8, 28.7, 14.0; IR (neat):  $\nu$  = 2963, 1940, 1716, 1491, 1434, 1361, 1275, 1194, 1170, 1091, 1037, 1012 cm<sup>-1</sup>; MS (70 eV, EI)  $m/z$  (%): 281 (M<sup>+</sup> (<sup>37</sup>Cl) +1, 1.67), 280 (M<sup>+</sup> (<sup>37</sup>Cl), 9.09), 279 (M<sup>+</sup> (<sup>35</sup>Cl) +1, 4.62), 278 (M<sup>+</sup> (<sup>35</sup>Cl), 27.92), 222 (100); HRMS calcd for C<sub>16</sub>H<sub>19</sub><sup>35</sup>ClO<sub>2</sub> [M<sup>+</sup>]: 278.1074; found 278.1069.

**The reaction of 1c with 2m under the standard conditions (yy-01-048)**

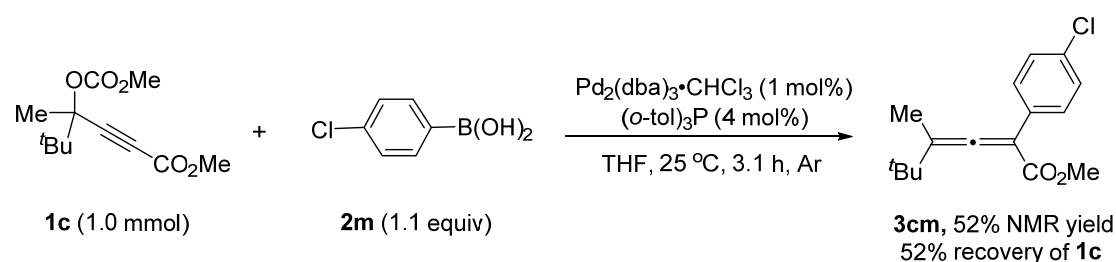

Following **Typical Procedure III**, the reaction of Pd<sub>2</sub>(dba)<sub>3</sub>·CHCl<sub>3</sub> (10.6 mg, 0.01 mmol), tris(*o*-tolyl)phosphine (12.5 mg, 0.04 mmol), **2m** (178.5 mg, 1.1 mmol), and **1c** (246.7 mg, 1.0 mmol) in freshly distilled THF (2.0 mL) afforded a crude product. 52% NMR yield of **3cm** and 52% recovered of **1c** were determined by the NMR spectrum of the crude product with CH<sub>2</sub>Br<sub>2</sub> (17.5  $\mu$ L) as the internal standard.

**(14) Preparation of methyl**

**4,4-pentamethylene-2-(4-methylphenyl)-2,3-butadienoate (3dn) (yao-01-123)**

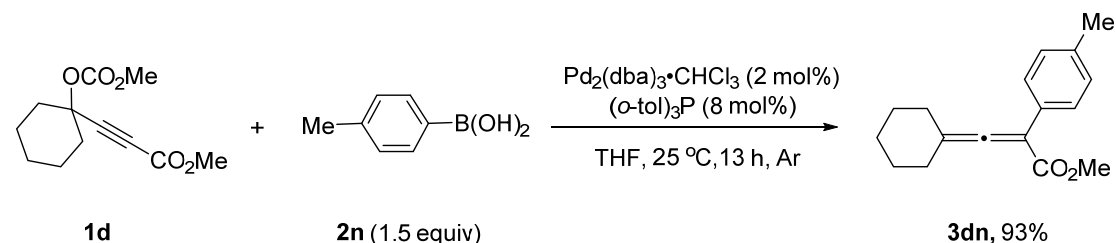

Following **Typical Procedure III**, the reaction of Pd<sub>2</sub>(dba)<sub>3</sub>·CHCl<sub>3</sub> (20.5 mg, 0.02 mmol), tris(*o*-tolyl)phosphine (24.8 mg, 0.08 mmol), **2n** (205.3 mg, 1.5 mmol), and **1d** (237.1 mg, 1.0 mmol) in freshly distilled THF (2.0 mL) afforded **3dn** (236.4 mg, 93%) [eluent: petroleum ether (~100 mL) to petroleum ether/ethyl acetate = 50/1

(~100 mL) to petroleum ether/ethyl acetate = 100/3 (~100 mL) to petroleum ether/ethyl acetate = 25/1 (~200 mL)]: oil;  $^1\text{H NMR}$  (400 MHz,  $\text{CDCl}_3$ ):  $\delta$  = 7.36 (d,  $J$  = 8.0 Hz, 2 H, Ar-H), 7.14 (d,  $J$  = 7.6 Hz, 2 H, Ar-H), 3.78 (s, 3 H,  $\text{OCH}_3$ ), 2.40-2.25 (m, 7 H, 2 x  $\text{CH}_2$  and  $\text{CH}_3$ ), 1.80-1.54 (m, 6 H, 3 x  $\text{CH}_2$ );  $^{13}\text{C NMR}$  (100 MHz,  $\text{CDCl}_3$ ):  $\delta$  = 206.3, 167.5, 136.8, 131.2, 128.8, 128.3, 107.2, 100.3, 52.0, 30.4, 27.1, 25.8, 21.1; **IR** (neat):  $\nu$  = 2926, 2852, 1947, 1714, 1511, 1433, 1274, 1222, 1162, 1089, 1032, 1017  $\text{cm}^{-1}$ ; **MS** (70 eV, EI)  $m/z$  (%): 257 ( $\text{M}^+ + 1$ , 19.12), 256 ( $\text{M}^+$ , 100); **HRMS** calcd for  $\text{C}_{17}\text{H}_{20}\text{O}_2$  [ $\text{M}^+$ ]: 256.1463; found 256.1457.

**The reaction of 1d with 2n under the standard conditions (yy-01-049)**

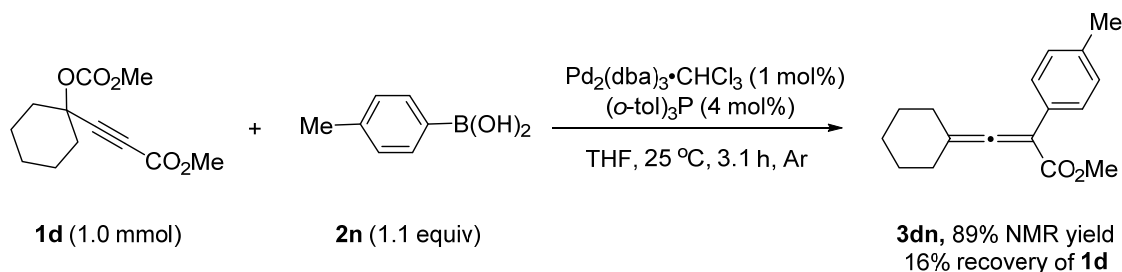

Following **Typical Procedure III**, the reaction of  $\text{Pd}_2(\text{dba})_3\cdot\text{CHCl}_3$  (10.3 mg, 0.01 mmol), tris(*o*-tolyl)phosphine (12.4 mg, 0.04 mmol), **2n** (150.3 mg, 1.1 mmol), and **1d** (238.0 mg, 1.0 mmol) in freshly distilled THF (2.0 mL) afforded a crude product. 89% NMR yield of **3dn** and 16% recovered of **1d** were determined by the NMR spectrum of the crude product with  $\text{CH}_2\text{Br}_2$  (17.5  $\mu\text{L}$ ) as the internal standard.

**(15) Preparation of methyl 6,6-dimethoxy-4-methyl-2-phenyl-2,3-hexadienoate (3ea) (yao-01-072)**

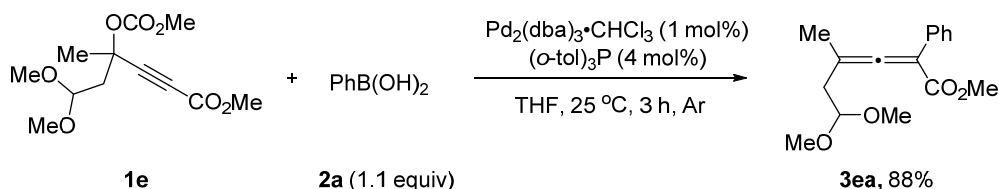

Following **Typical Procedure III**, the reaction of  $\text{Pd}_2(\text{dba})_3\cdot\text{CHCl}_3$  (11.4 mg, 0.01 mmol), tris(*o*-tolyl)phosphine (12.4 mg, 0.04 mmol), **2a** (135.8 mg, 1.1 mmol), and **1e** (272.1 mg, 1.0 mmol) in freshly distilled THF (2.0 mL) afforded **3ea** (240.3 mg, 88%) [eluent: petroleum ether/ethyl acetate = 25/1 (~100 mL) to petroleum ether/ethyl

acetate = 20/1 (~100 mL) to petroleum ether/ethyl acetate = 25/2 (~100 mL) to petroleum ether/ethyl acetate = 25/3 (~100 mL) to petroleum ether/ethyl acetate = 10/1 (~200 mL) to petroleum ether/ethyl acetate = 5/1 (~100 mL)]: oil; **<sup>1</sup>H NMR** (400 MHz, CDCl<sub>3</sub>): δ = 7.56-7.48 (m, 2 H, Ar-H), 7.37-7.29 (m, 2 H, Ar-H), 7.28-7.21 (m, 1 H, Ar-H), 4.56 (t, *J* = 5.6 Hz, 1 H, CH), 3.80 (s, 3 H, OCH<sub>3</sub>), 3.31 (s, 3 H, OCH<sub>3</sub>), 3.27 (s, 3 H, OCH<sub>3</sub>), 2.47 (d, *J* = 5.6 Hz, 2 H, CH<sub>2</sub>), 1.92 (s, 3 H, CH<sub>3</sub>); **<sup>13</sup>C NMR** (100 MHz, CDCl<sub>3</sub>): δ = 209.9, 167.0, 133.4, 128.2, 128.1, 127.2, 102.7, 101.8, 100.8, 52.9, 52.8, 52.1, 36.9, 18.6; **IR** (neat): ν = 2949, 2831, 1952, 1715, 1493, 1434, 1367, 1272, 1196, 1119, 1053, 1020 cm<sup>-1</sup>; **MS** (ESI) *m/z*: 299 (M+Na<sup>+</sup>), 277 (M+H<sup>+</sup>), 245 (M-OMe)<sup>+</sup>; **HRMS** calcd for C<sub>16</sub>H<sub>20</sub>O<sub>4</sub> [M<sup>+</sup>]: 276.1362; found 276.1364.

#### (16) Preparation of methyl 4-methyl-2-phenyl-2,3,7-octatrienoate (**3fa**)

(yao-01-117)

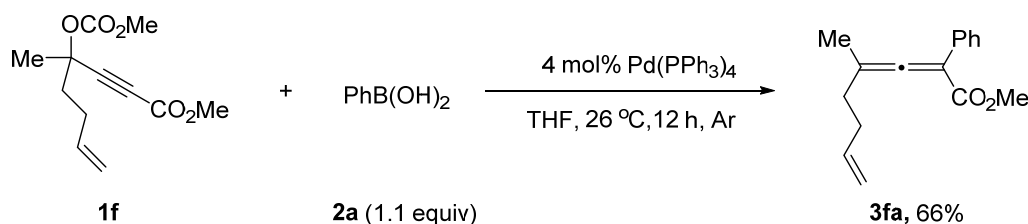

To an oven-dried Schlenk tube were added **2a** (135.9 mg, 1.1 mmol), which was then transferred to a glovebox. After adding Pd(PPh<sub>3</sub>)<sub>4</sub> (48.4 mg, 0.04 mmol) in glovebox, it was transferred out of the glovebox. After replacing nitrogen with argon for three times at rt by vacuum, **1f** (235.5 mg, 1.0 mmol) and freshly distilled THF (2.0 mL) were added. The resulting mixture was stirred for 12 h at 26 °C as monitored by TLC and filtered through a short pad of silica gel with ethyl acetate (15 mL x 3) as the eluent. After removal of the solvent under vacuum, the residue was purified by flash column chromatography on silica gel to afford **3fa** (156.0 mg, 66%) [eluent: petroleum ether (~100 mL) to petroleum ether/ethyl acetate = 50/1 (~100 mL) to petroleum ether/ethyl acetate = 100/3 (~100 mL) to petroleum ether/ethyl acetate = 25/1 (~200 mL)]: oil; **<sup>1</sup>H NMR** (400 MHz, CDCl<sub>3</sub>): δ = 7.47 (d, *J* = 7.6 Hz, 2 H, Ar-H), 7.32 (t, *J* = 7.6 Hz, 2 H, Ar-H), 7.27-7.20 (m, 1 H, Ar-H), 5.90-5.75 (m, 1 H,

CH=), 5.02 (d,  $J = 17.2$  Hz, 1 H, one proton of  $=CH_2$ ), 4.95 (d,  $J = 10.8$  Hz, 1 H, one proton of  $=CH_2$ ), 3.78 (s, 3 H,  $OCH_3$ ), 2.32-2.19 (m, 4 H, 2 x  $CH_2$ ), 1.89 (s, 3 H,  $CH_3$ );  $^{13}C$  NMR (100 MHz,  $CDCl_3$ ):  $\delta = 209.2, 167.2, 137.6, 133.8, 128.3, 128.1, 127.2, 115.1, 104.7, 102.3, 52.0, 33.0, 31.4, 18.1$ ; **IR** (neat):  $\nu = 2948, 1949, 1715, 1640, 1599, 1493, 1434, 1273, 1196, 1176, 1040\text{ cm}^{-1}$ ; **MS** (70 eV, EI)  $m/z$  (%): 243 ( $M^+ + 1$ , 1.73), 242 ( $M^+$ , 9.22), 141 (100); **HRMS** calcd for  $C_{16}H_{18}O_2$  [ $M^+$ ]: 242.1307; found 242.1310.

#### The reaction of **1f** with **2a** under the standard conditions (yao-01-112)

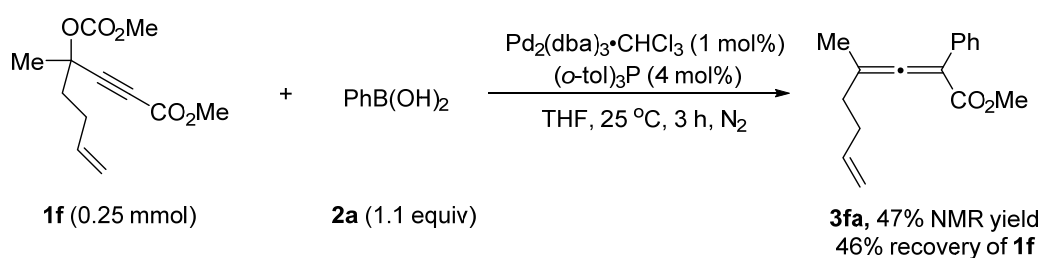

To an oven-dried vial were added **2a** (33.8 mg, 0.275 mmol),  $Pd_2(dba)_3 \cdot CHCl_3$  (2.4 mg, 0.025 mmol), tris(*o*-tolyl)phosphine (2.9 mg, 0.01 mmol), which was then transferred to a glovebox. After adding **1f** (59.1 mg, 0.25 mmol) and freshly distilled THF (0.5 mL) in glovebox, it was transferred out of the glovebox. The resulting mixture was stirred for 3 h at 25 °C, then filtered through a short pad of silica gel with ethyl acetate (4 mL) as the eluent afforded a crude product. 47% NMR yield of **3fa** and 46% recovered of **1f** were determined by the NMR spectrum of the crude product with  $CH_2Br_2$  (17.5  $\mu$ L) as the internal standard.

#### 4. Gram-scale reactions

##### (1) Gram-scale preparation of methyl 2-phenyl-4-methyl-2,3-heptadienoate (**3aa**)

##### (yao-01-132)

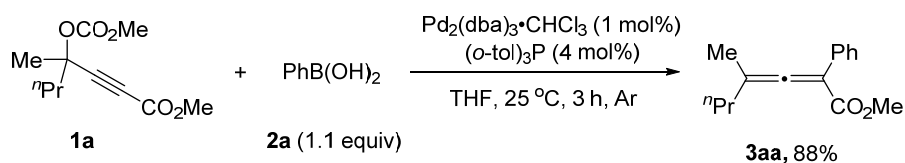

Following **Typical Procedure III**, the reaction of  $Pd_2(dba)_3 \cdot CHCl_3$  (0.0625 g, 0.06 mmol), tris(*o*-tolyl)phosphine (0.0738 g, 0.24 mmol), **2a** (0.8062 g, 6.6 mmol),

and **1a** (1.3664 g, 6.0 mmol) in freshly distilled THF (12.0 mL) afforded **3aa** (1.2187 g, 88%) [eluent: petroleum ether (~200 mL) to petroleum ether/ethyl acetate = 50/1 (~200 mL) to petroleum ether/ethyl acetate = 100/3 (~200 mL) to petroleum ether/ethyl acetate = 25/1 (~200 mL)]: oil; **<sup>1</sup>H NMR** (400 MHz, CDCl<sub>3</sub>): δ = 7.52-7.43 (m, 2 H, Ar-H), 7.37-7.29 (m, 2 H, Ar-H), 7.29-7.22 (m, 1 H, Ar-H), 3.79 (s, 3 H, OCH<sub>3</sub>), 2.21-2.07 (m, 2 H, CH<sub>2</sub>), 1.87 (s, 3 H, CH<sub>3</sub>), 1.61-1.48 (m, 2 H, CH<sub>2</sub>), 0.94 (t, *J* = 7.4 Hz, 3 H, CH<sub>3</sub> of "Pr"); **<sup>13</sup>C NMR** (100 MHz, CDCl<sub>3</sub>): δ = 209.4, 167.3, 133.9, 128.3, 128.0, 127.1, 105.0, 101.7, 52.0, 35.6, 20.4, 17.9, 13.6.

## (2) Gram-scale preparation of methyl 2-phenyl-4-methyl-2,3-heptadienoate (**3ba**)

(yao-01-145)

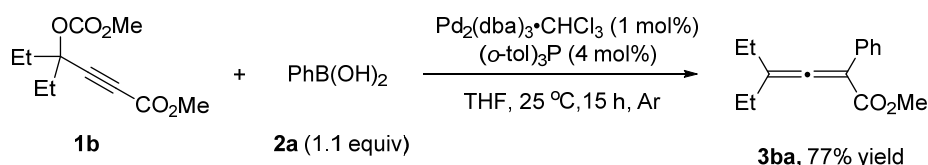

Following **Typical Procedure III**, The reaction of Pd<sub>2</sub>(dba)<sub>3</sub>·CHCl<sub>3</sub> (0.0622 g, 0.06 mmol), tris(*o*-tolyl)phosphine (0.0737 g, 0.24 mmol), **2a** (0.8240 g, 6.6 mmol), and **1b** (1.3628 g, 6.0 mmol) in freshly distilled THF (12.0 mL) afforded **3ba** (1.0590 g, 77%) as an oil [eluent: petroleum ether (~200 mL) to petroleum ether/ethyl acetate = 60/1 (~240 mL) to petroleum ether/ethyl acetate = 50/1 (~200 mL)]: oil; **<sup>1</sup>H NMR** (400 MHz, CDCl<sub>3</sub>): δ = 7.54-7.47 (m, 2 H, Ar-H), 7.36-7.28 (m, 2 H, Ar-H), 7.27-7.21 (m, 1 H, Ar-H), 3.78 (s, 3 H, OCH<sub>3</sub>), 2.18 (q, *J* = 7.3 Hz, 4 H, 2 x CH<sub>2</sub>), 1.09 (t, *J* = 7.4 Hz, 6 H, 2 x CH<sub>3</sub>); **<sup>13</sup>C NMR** (100 MHz, CDCl<sub>3</sub>): δ = 208.7, 167.5, 134.1, 128.10, 128.08, 127.1, 113.7, 104.4, 52.0, 25.6, 12.0; **IR** (neat): ν = 2967, 1945, 1714, 1599, 1493, 1434, 1273, 1194, 1174, 1084, 1040, 1022 cm<sup>-1</sup>; **MS** (70 eV, EI) *m/z* (%): 231 (*M*<sup>+</sup>+1, 10.89), 230 (*M*<sup>+</sup>, 66.27), 115 (100); **HRMS** calcd for C<sub>15</sub>H<sub>18</sub>O<sub>2</sub> [*M*<sup>+</sup>]: 230.1307; found 230.1308.

## 5. Synthetic applications

### (1) Preparation of 4-bromo-5-methyl-3-phenyl-5-propylfuran-2(5*H*)-one<sup>4</sup> (**4**)

**(yao-01-140)**

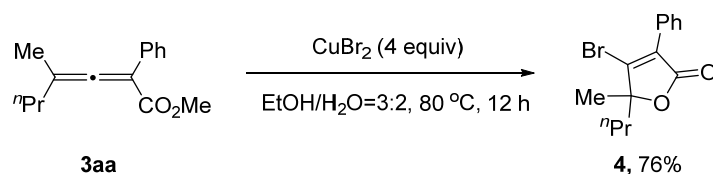

To a Schlenk tube were added CuBr<sub>2</sub> (451.2 mg, 2.0 mmol), **3aa** (114.0 mg, 0.5 mmol), EtOH (3.0 mL), and H<sub>2</sub>O (2.0 mL) sequentially. Then the Schlenk tube was placed in an oil bath pre-heated at 80 °C with stirring for 12 h. To the mixture was added H<sub>2</sub>O (5.0 mL). After extraction with ethyl acetate (5 mL x 3), the organic layer was then washed with brine (10 mL) and dried over anhydrous Na<sub>2</sub>SO<sub>4</sub>. After filtration and concentration under reduced pressure, the crude product was purified by column chromatography on silica gel to afford **4** (113.8 mg, 76%, purity = 98%) [eluent: petroleum ether (~100 mL) to petroleum ether /dichloromethane/ethyl ether = 100/1/1 (~200 mL) to petroleum ether /dichloromethane/ethyl ether = 80/1/1 (~400 mL) to petroleum ether /dichloromethane/ethyl ether = 50/1/1 (~200 mL)]: solid; **m.p.** 79.6-80.6 °C (petroleum ether/CH<sub>2</sub>Cl<sub>2</sub>); **<sup>1</sup>H NMR** (400 MHz, CDCl<sub>3</sub>): δ = 7.75 (dd, *J*<sub>1</sub> = 8.0 Hz, *J*<sub>2</sub> = 1.6 Hz, 2 H, Ar-H), 7.50-7.39 (m, 3 H, Ar-H), 1.99-1.89 (m, 1 H, one proton of CH<sub>2</sub>), 1.89-1.79 (m, 1 H, one proton of CH<sub>2</sub>), 1.60 (s, 3 H, CH<sub>3</sub>), 1.41-1.29 (m, 1 H, one proton of CH<sub>2</sub>), 1.29-1.15 (m, 1 H, one proton of CH<sub>2</sub>), 0.94 (t, 3 H, *J* = 7.4 Hz, CH<sub>3</sub> of nPr); **<sup>13</sup>C NMR** (100 MHz, CDCl<sub>3</sub>): δ = 169.1, 148.7, 129.4, 128.7, 128.5, 128.4, 88.5, 39.3, 24.3, 16.2, 13.8; **IR** (neat): ν = 3053, 2961, 2928, 2870, 1738, 1644, 1597, 1493, 1445, 1376, 1296, 1154, 1134, 1027, 1004 cm<sup>-1</sup>; **MS** (70 eV, EI) *m/z* (%): 296 (M<sup>+</sup>(<sup>81</sup>Br), 10.20), 294 (M<sup>+</sup>(<sup>79</sup>Br), 9.93), 43 (100); Anal. Calcd. for C<sub>14</sub>H<sub>15</sub>BrO<sub>2</sub>: C 56.97, H 5.12; found C 56.82, H 5.16.

**(2) Preparation of 3-ethyl-4-methyl-2-phenyl-4-propylcyclobut-2-enone<sup>5</sup> (5)**

**(yao-01-142)**

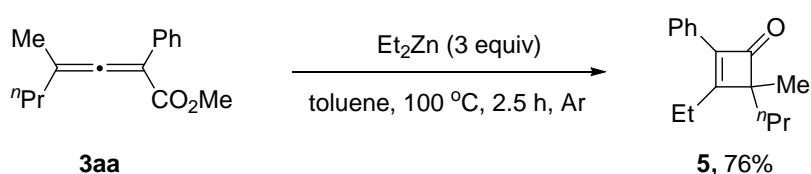

To an oven-dried Schlenk tube were added **3aa** (114.0 mg, 0.5 mmol) and toluene (5.0 mL) under an argon atmosphere at room temperature. A solution of Et<sub>2</sub>Zn in toluene (1.0 mL, 1.5 M, 1.5 mmol, 3 equiv) was added with a syringe dropwise within 2 min at rt and the tube was then submerged in an oil bath preheated to 100 °C. After being stirred for 2.5 h, the reaction mixture was quenched by dropwise addition of a saturated aqueous solution of NH<sub>4</sub>Cl (10 mL) at 0 °C. After warming up to room temperature, H<sub>2</sub>O (50 mL) was added and the resulting mixture was extracted with diethyl ether (3 × 50 mL). The combined organic layer was washed sequentially with diluted HCl (5%, aq.), a saturated aqueous solution of NaHCO<sub>3</sub>, and brine, and dried over anhydrous Na<sub>2</sub>SO<sub>4</sub>. After filtration and concentration under reduced pressure, the crude product was purified by column chromatography on silica gel to afford **5** (85.8 mg, 76%) [eluent: petroleum ether/ethyl ether = 100/1 (~100 mL) to petroleum ether/ethyl acetate = 60/1 (~200 mL)]: oil; **<sup>1</sup>H NMR** (400 MHz, CDCl<sub>3</sub>): δ = 7.68-7.61 (m, 2 H, Ar-H), 7.38 (t, *J* = 7.6 Hz, 2 H, Ar-H), 7.32-7.25 (m, 1 H, Ar-H), 2.92-2.71 (m, 2 H, CH<sub>2</sub>), 1.75-1.65 (m, 1 H, one proton of CH<sub>2</sub>), 1.62-1.51 (m, 1 H, one proton of CH<sub>2</sub>), 1.40-1.25 (m, 8 H, 2 × CH<sub>3</sub> and CH<sub>2</sub>), 0.90 (t, *J* = 7.2 Hz, 3 H, CH<sub>3</sub> of *n*Pr); **<sup>13</sup>C NMR** (100 MHz, CDCl<sub>3</sub>): δ = 196.8, 180.8, 140.4, 130.2, 128.6, 128.1, 127.2, 67.0, 37.0, 21.8, 20.2, 19.3, 14.5, 11.4; **IR** (neat): ν = 2957, 2872, 1748, 1628, 1596, 1493, 1447, 1088, 1066 cm<sup>-1</sup>; **MS** (70 eV, EI) *m/z* (%): 229 (*M*<sup>+</sup>+1, 2.62), 228 (*M*<sup>+</sup>, 14.48), 199 (100); **HRMS** calcd for C<sub>16</sub>H<sub>20</sub>O [*M*<sup>+</sup>]: 228.1514; found 228.1517.

### (3) Preparation of 4-methyl-2-phenyl-2,3-heptadien-1-ol (**6**) (yao-01-136)

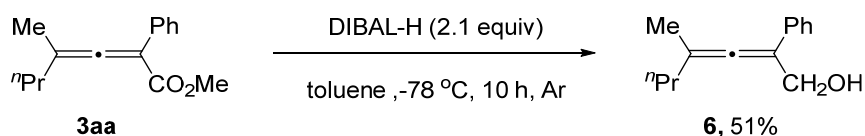

To an oven-dried Schlenk tube were added **3aa** (115.3 mg, 0.5 mmol) and toluene (5.0 mL) under a argon atmosphere at room temperature, The solution was cooled to -78 °C and then DIBAL-H (1.0 M in hexane, 1.05 mL, 1.05 mmol) was added with a syringe dropwise at -78 °C. After stirring at -78 °C for 10 hours, the reaction was

quenched with MeOH (5 mL) and the resulting mixture was warmed up to room temperature. Then H<sub>2</sub>O (10 mL) and 1 N HCl (10 mL) were added sequentially. After extraction with ethyl ether (10 mL x 3), the combined organic layer was washed with brine (10 mL) and dried over anhydrous Na<sub>2</sub>SO<sub>4</sub>. After filtration and concentration under reduced pressure, the crude product was purified by column chromatography on silica gel to afford **6** (55.3 mg, 51%, purity = 93%) [eluent: petroleum ether/ethyl acetate = 50/1 (~100 mL) to petroleum ether/ethyl acetate = 30/1 (~100 mL) to petroleum ether/ethyl acetate = 20/1 (~300 mL)]: oil; <sup>1</sup>H NMR (400 MHz, CDCl<sub>3</sub>): δ = 7.38 (d, *J* = 7.6 Hz, 2 H, Ar-H), 7.32 (t, *J* = 7.6 Hz, 2 H, Ar-H), 7.20 (t, *J* = 7.4 Hz, 1 H, Ar-H), 4.51 (s, 2 H, CH<sub>2</sub>O), 2.17-2.01 (m, 2 H, CH<sub>2</sub>), 1.84 (s, 3 H, CH<sub>3</sub>), 1.66 (brs, 1 H, OH), 1.55-1.44 (m, 2 H, CH<sub>2</sub> of <sup>n</sup>Pr), 0.94 (t, *J* = 7.4 Hz, 3 H, CH<sub>3</sub> of <sup>n</sup>Pr); <sup>13</sup>C NMR (100 MHz, CDCl<sub>3</sub>): δ = 199.3, 135.6, 128.4, 126.7, 125.9, 106.6, 105.9, 61.6, 36.4, 20.9, 18.9, 13.9; IR (neat): ν = 3357, 2957, 2930, 2871, 1948, 1598, 1494, 1456, 1397, 1368, 1057, 1025 cm<sup>-1</sup>; MS (70 eV, EI) *m/z* (%): 203 (M<sup>+</sup>+1, 2.09), 202 (M<sup>+</sup>, 13.02), 129 (100); HRMS calcd for C<sub>14</sub>H<sub>18</sub>O [M<sup>+</sup>]: 202.1358; found 202.1357.

#### (4) Preparation of 4-ethyl-2-phenyl-2,3-hexadienoic acid (**7**)<sup>6</sup> (yao-01-149)

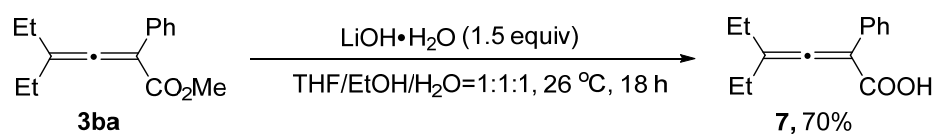

To a Schlenk tube were added **3ba** (114.0 mg, 0.5 mmol), THF (1.0 mL), LiOH·H<sub>2</sub>O (32.4 mg, 0.75 mmol, 1.5 equiv.), EtOH (1.0 mL), and H<sub>2</sub>O (1.0 mL) sequentially. The reaction mixture was stirred for 18 h at 26 °C. Then 2 M HCl solution (aqueous, 5 mL) and H<sub>2</sub>O (10 mL) were added sequentially and the resulting mixture was extracted with ethyl acetate (10 mL x 3). Then the combined organic layer was washed with brine and dried over Na<sub>2</sub>SO<sub>4</sub>. After filtration and evaporation of the solvent, the crude product was purified by column chromatography on silica gel to afford **7** (75.0 mg, 70%) [eluent: petroleum ether/ ethyl acetate = 10/1 (~200 mL) to petroleum ether/ethyl acetate = 20/3 (~220 mL) to petroleum ether/ethyl acetate = 5/1 (~120 mL) to petroleum ether/ethyl acetate = 3/1 (~120 mL)]: solid; **m.p.** 86.7-87.9

$^{\circ}\text{C}$  (petroleum ether/ethyl ether);  $^1\text{H}$  NMR (400 MHz,  $\text{CDCl}_3$ ):  $\delta$  = 11.6 (brs, 1 H, COOH), 7.52 (d,  $J$  = 7.2 Hz, 2 H, Ar-H), 7.33 (t,  $J$  = 7.4 Hz, 2 H, Ar-H), 7.30-7.25 (m, 1 H, Ar-H), 2.20 (q,  $J$  = 7.3 Hz, 4 H, 2 x  $\text{CH}_2$ ), 1.12 (t,  $J$  = 7.2 Hz, 6 H, 2 x  $\text{CH}_3$ );  $^1\text{H}$  NMR (400 MHz,  $\text{DMSO}-d_6$ ):  $\delta$  = 12.5 (brs, 1 H, COOH), 7.43 (d,  $J$  = 6.8 Hz, 2 H, Ar-H), 7.33 (t,  $J$  = 6.6 Hz, 2 H, Ar-H), 7.20-7.28 (m, 1 H, Ar-H), 2.15 (d,  $J$  = 6.4 Hz, 4 H, 2 x  $\text{CH}_2$ ), 1.01 (t,  $J$  = 6.6 Hz, 6 H, 2 x  $\text{CH}_3$ );  $^{13}\text{C}$  NMR (100 MHz,  $\text{CDCl}_3$ ):  $\delta$  = 210.4, 173.0, 133.6, 128.4, 128.1, 127.3, 114.1, 104.1, 25.6, 12.0; IR (neat):  $\nu$  = 3400-2250, 1934, 1670, 1493, 1451, 1401, 1321, 1280, 1196, 1185  $\text{cm}^{-1}$ ; MS (70 eV, EI)  $m/z$  (%): 217 ( $\text{M}^+ + 1$ , 14.22), 216 ( $\text{M}^+$ , 89.40), 201 (100); Anal. Calcd. for  $\text{C}_{14}\text{H}_{16}\text{O}_2$ : C 77.75, H 7.46; found C 77.45, H 7.36.

## 6. Evaluation of Biological Activity

### (1) Cytotoxicity test

Human lung cancer A549 cells were purchased from ATCC (Manassas, VA) and cultured in RPMI 1640 containing 10% FBS, 100 U/mL penicillin, and 100 mg/mL streptomycin. Cells were seeded in 96-well plates at a density of 2000 cells/well. On the next day, the cells were treated with different concentrations of compounds for 72 h and the sulforhodamine B (SRB) assay was used to measure the cell mass as previously described.<sup>7</sup>

### (2) Secretion of GLP-1 by STC-1 cells

STC-1 cells were kindly provided by Dr. Jia Li (Shanghai Institute of Materia Medica, Chinese Academy of Sciences) and cultured in DMEM containing 15% FBS, 100 U/mL penicillin, and 100 mg/mL streptomycin. STC-1 cells were seeded in 96-well plates at a density of 40000 cells/well and cultured overnight. After the cells were treated with 0.1% DPP-IV inhibitor PK44 in KRB buffer supplemented with 0.2% fatty acid-free BSA for 2 h, vehicle control (DMSO), positive control (1  $\mu\text{M}$  PMA) or compounds at different concentrations were added and cells were further incubated for another 2 h. Then the level of GLP-1 in supernatant of the culture

medium was measured with active GLP-1 kits according to the manufacturer's instructions (Cisbio, Bedford, MA).

## References

1. T. R. Pradhan, K. L. Mendhekar, D. K. Mohapatra, *J. Org. Chem.* **2015**, *80*, 5523.
2. G. Liao, H. Song, X. -S. Yin, B.-S. Shi, *Chem. Commun.* **2017**, *53*, 7824.
3. Y. Yamamoto, S. Shibano, T. Kurohara, M. Shibuya, *J. Org. Chem.* **2014**, *79*, 4503.
4. S. Ma, S. Wu, *Tetrahedron Lett.* **2001**, *42*, 4075.
5. G. Chai, S. Wu, C. Fu, S. Ma, *J. Am. Chem. Soc.* **2011**, *133*, 3740.
6. A. Tap, A. Blond, V. N. Wakchaure, B. List, *Angew. Chem., Int. Ed.* **2016**, *55*, 8962.
7. V. Vichai, K. Kirtikara, *Nat. Protoc.* **2006**, *1*, 1112.

YV-01-017  
 Sep 22 2017  
 SOLVENT: cdcl3  
 NA = 4  
 F1 = 399.749542 MHz

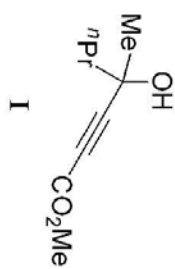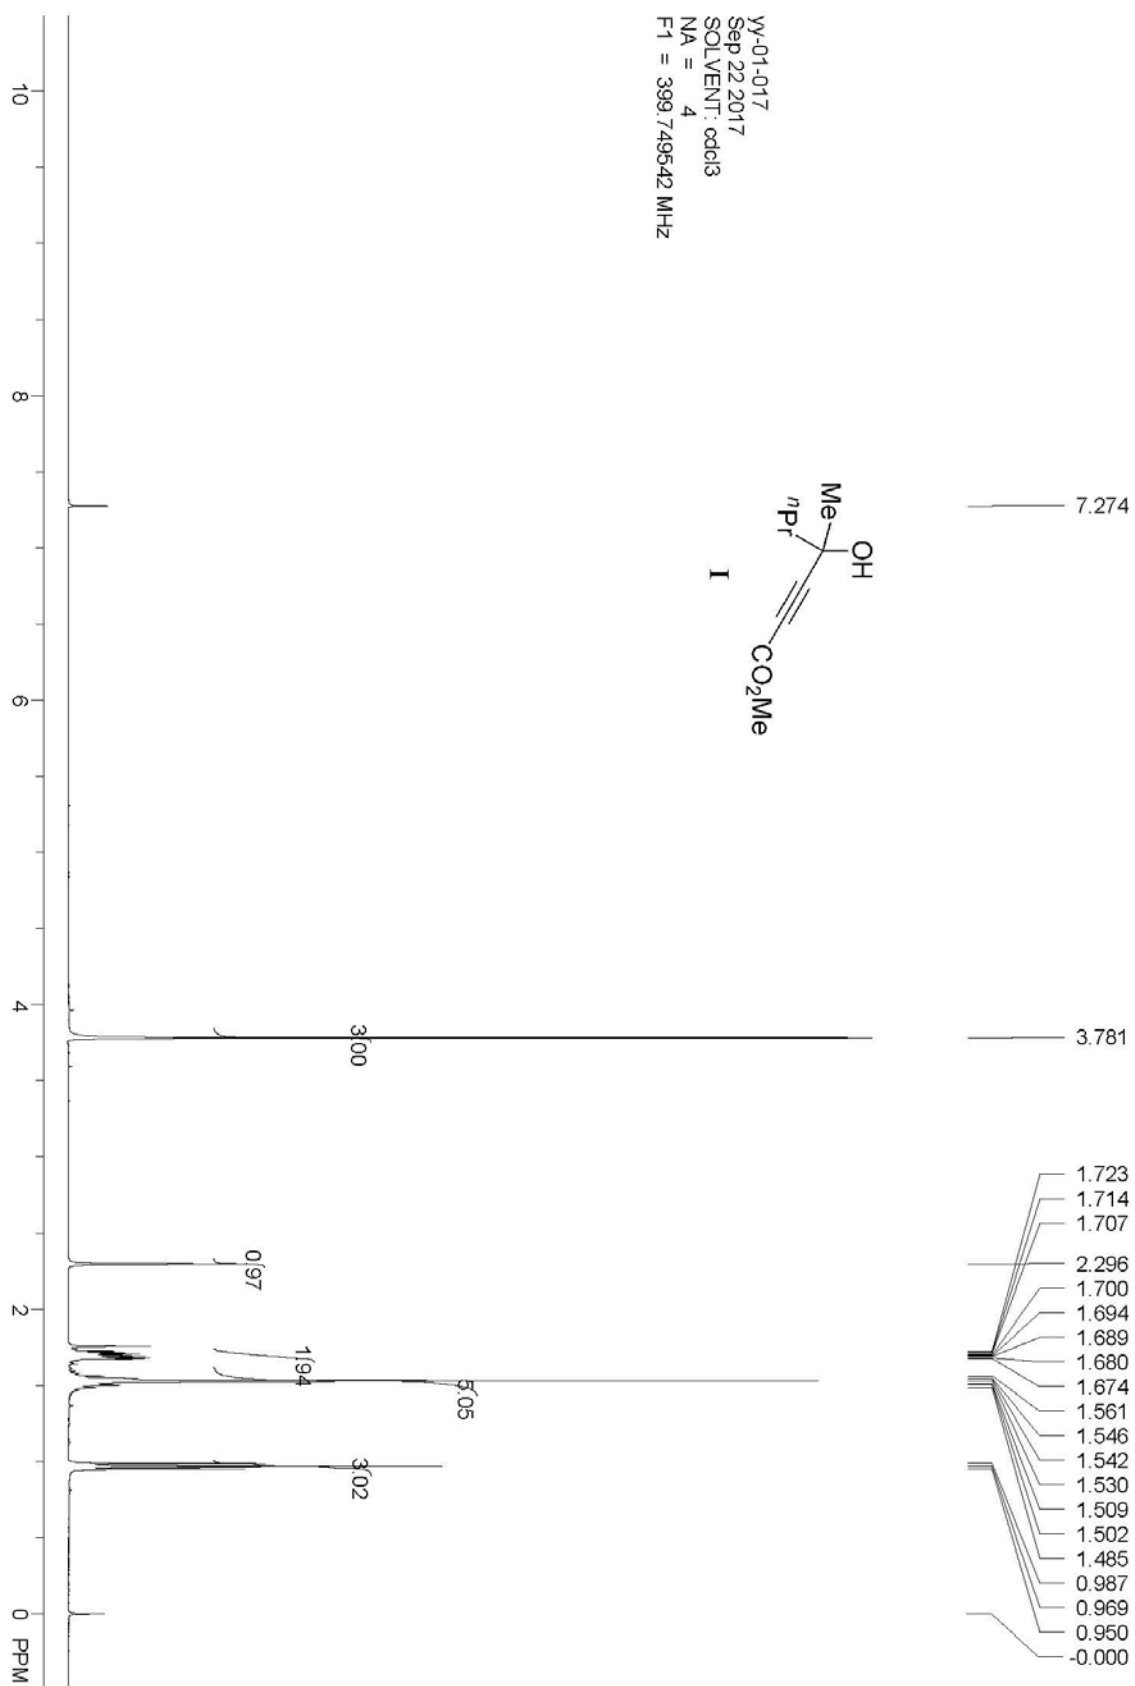

YJ-01-017C  
 Sep 22 2017  
 SOLVENT: cdcl3  
 NA = 64  
 F1 = 100.527557 MHz

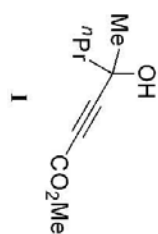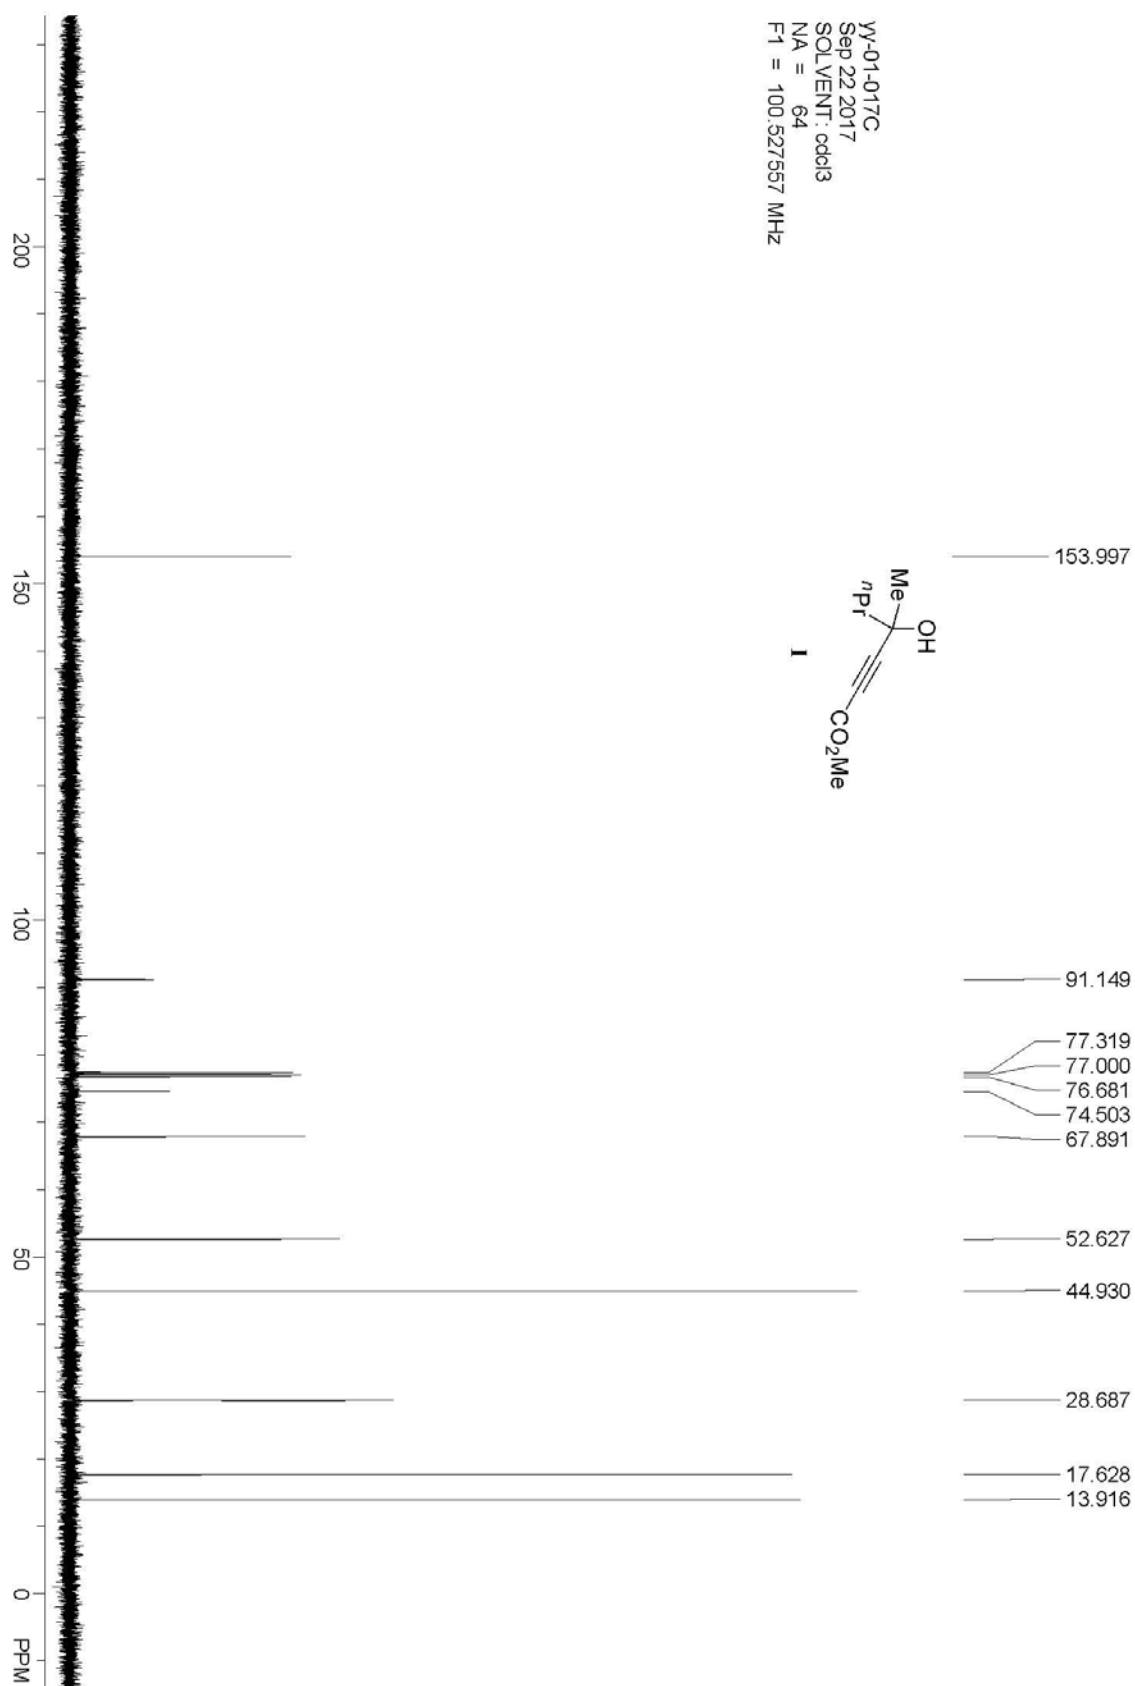

Yao-01-088  
 Nov 14 2017  
 SOLVENT: cdcl3  
 NA = 8  
 F1 = 399.749642 MHz

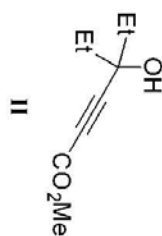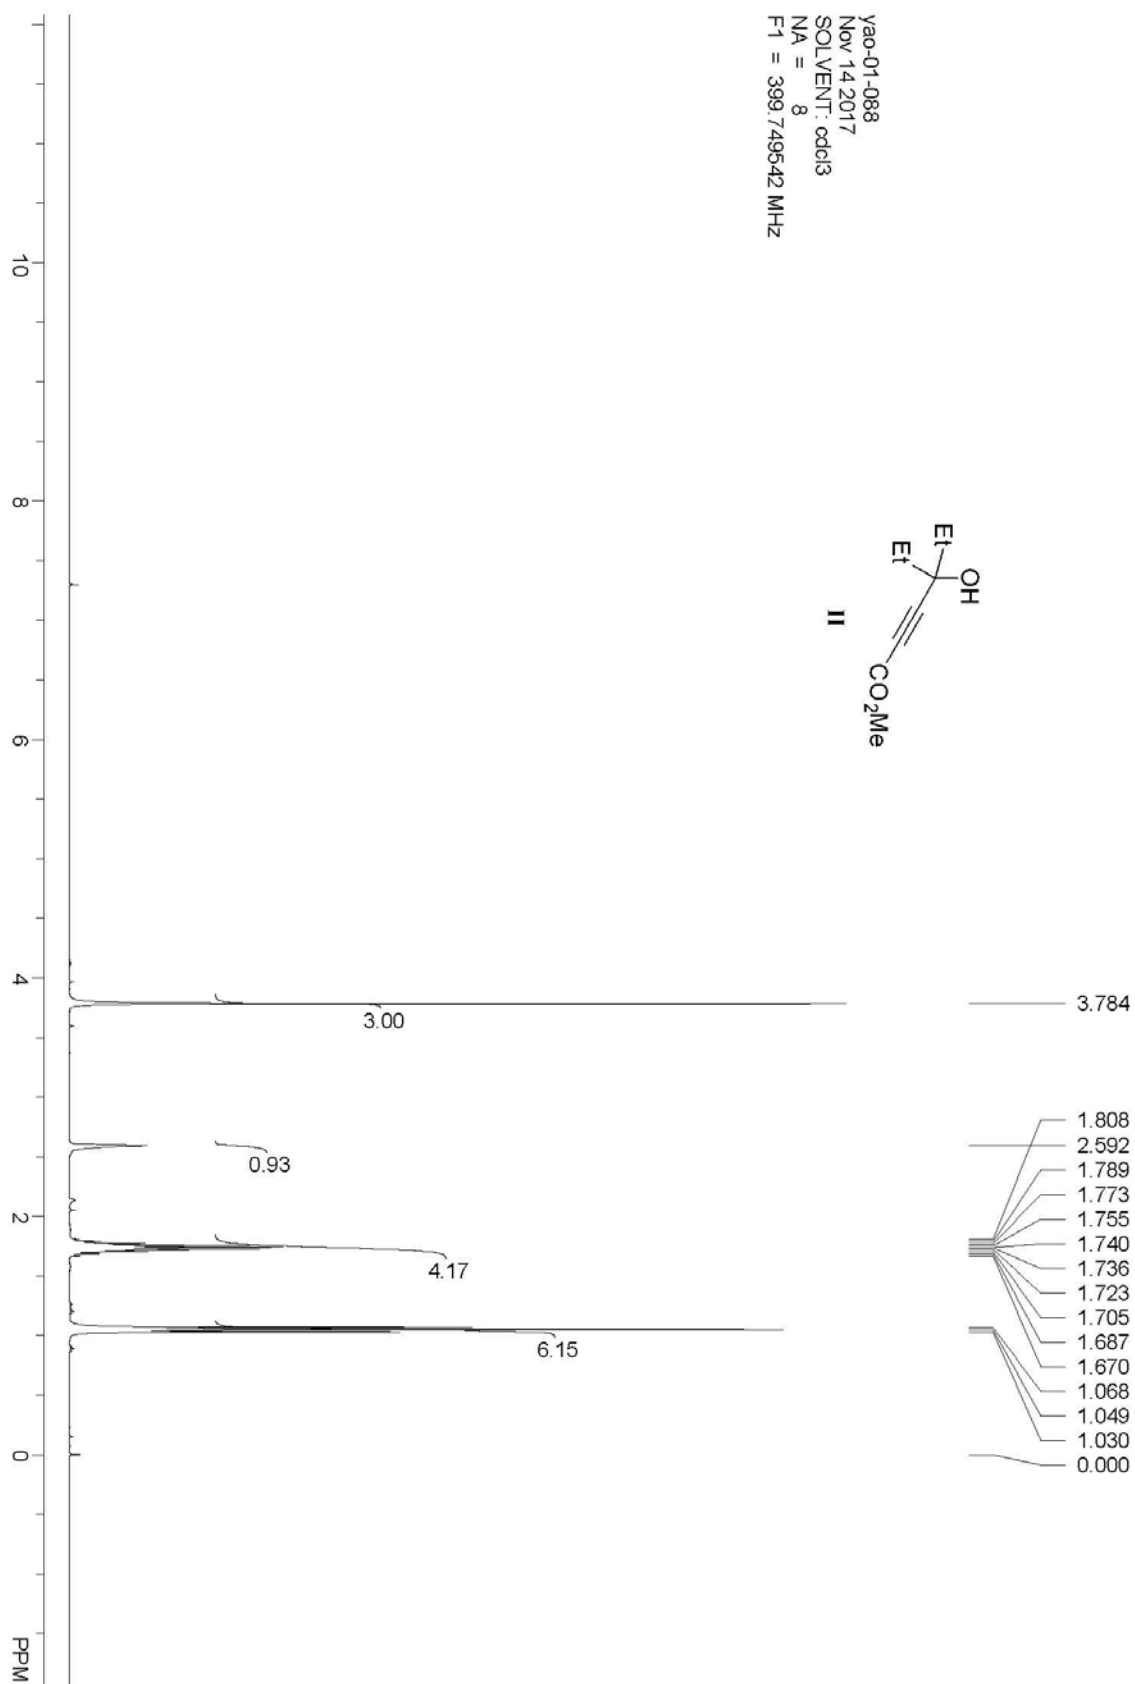

yao-01-088C  
 Nov 14 2017  
 SOLVENT: cdcl3  
 NA = 256  
 F1 = 100.527557 MHz

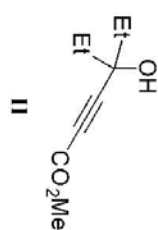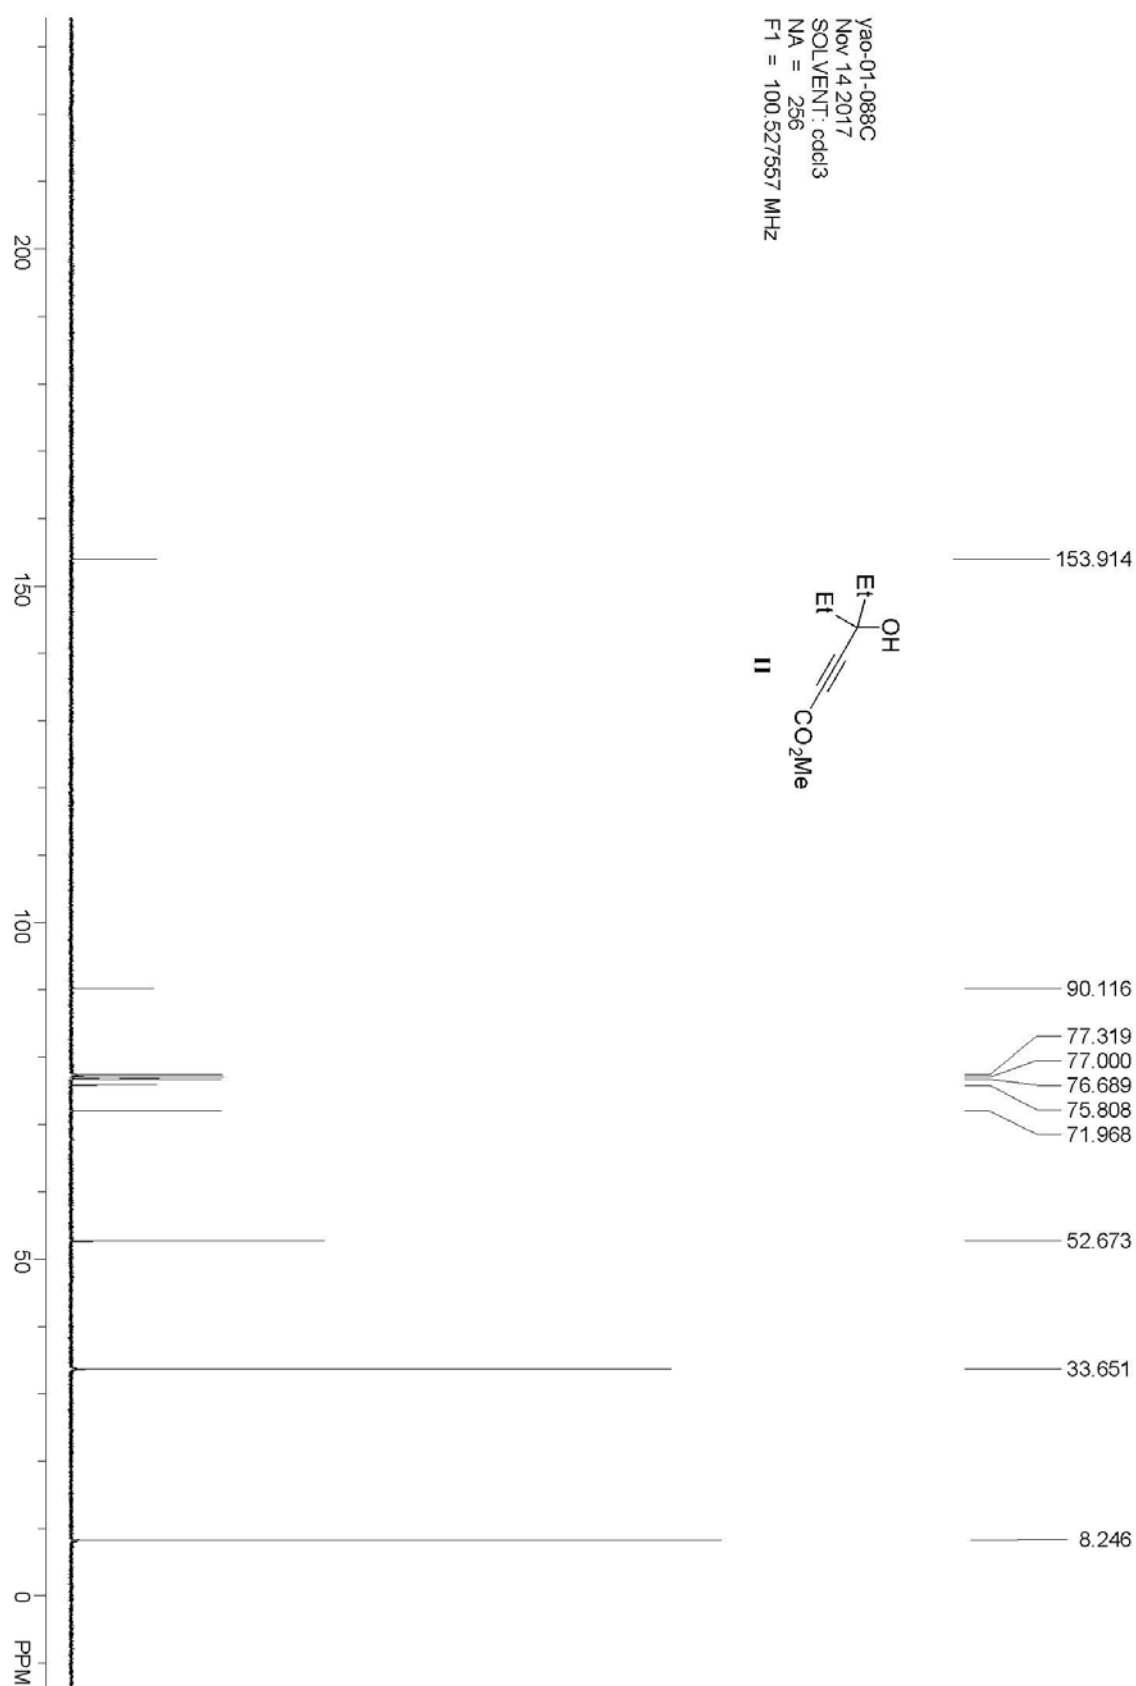

Yao-01-150  
 Mar 15 2018  
 NA = 8  
 Solvent = cdcl3  
 F1 = 399.749542 MHz

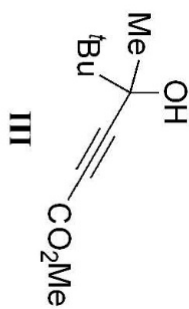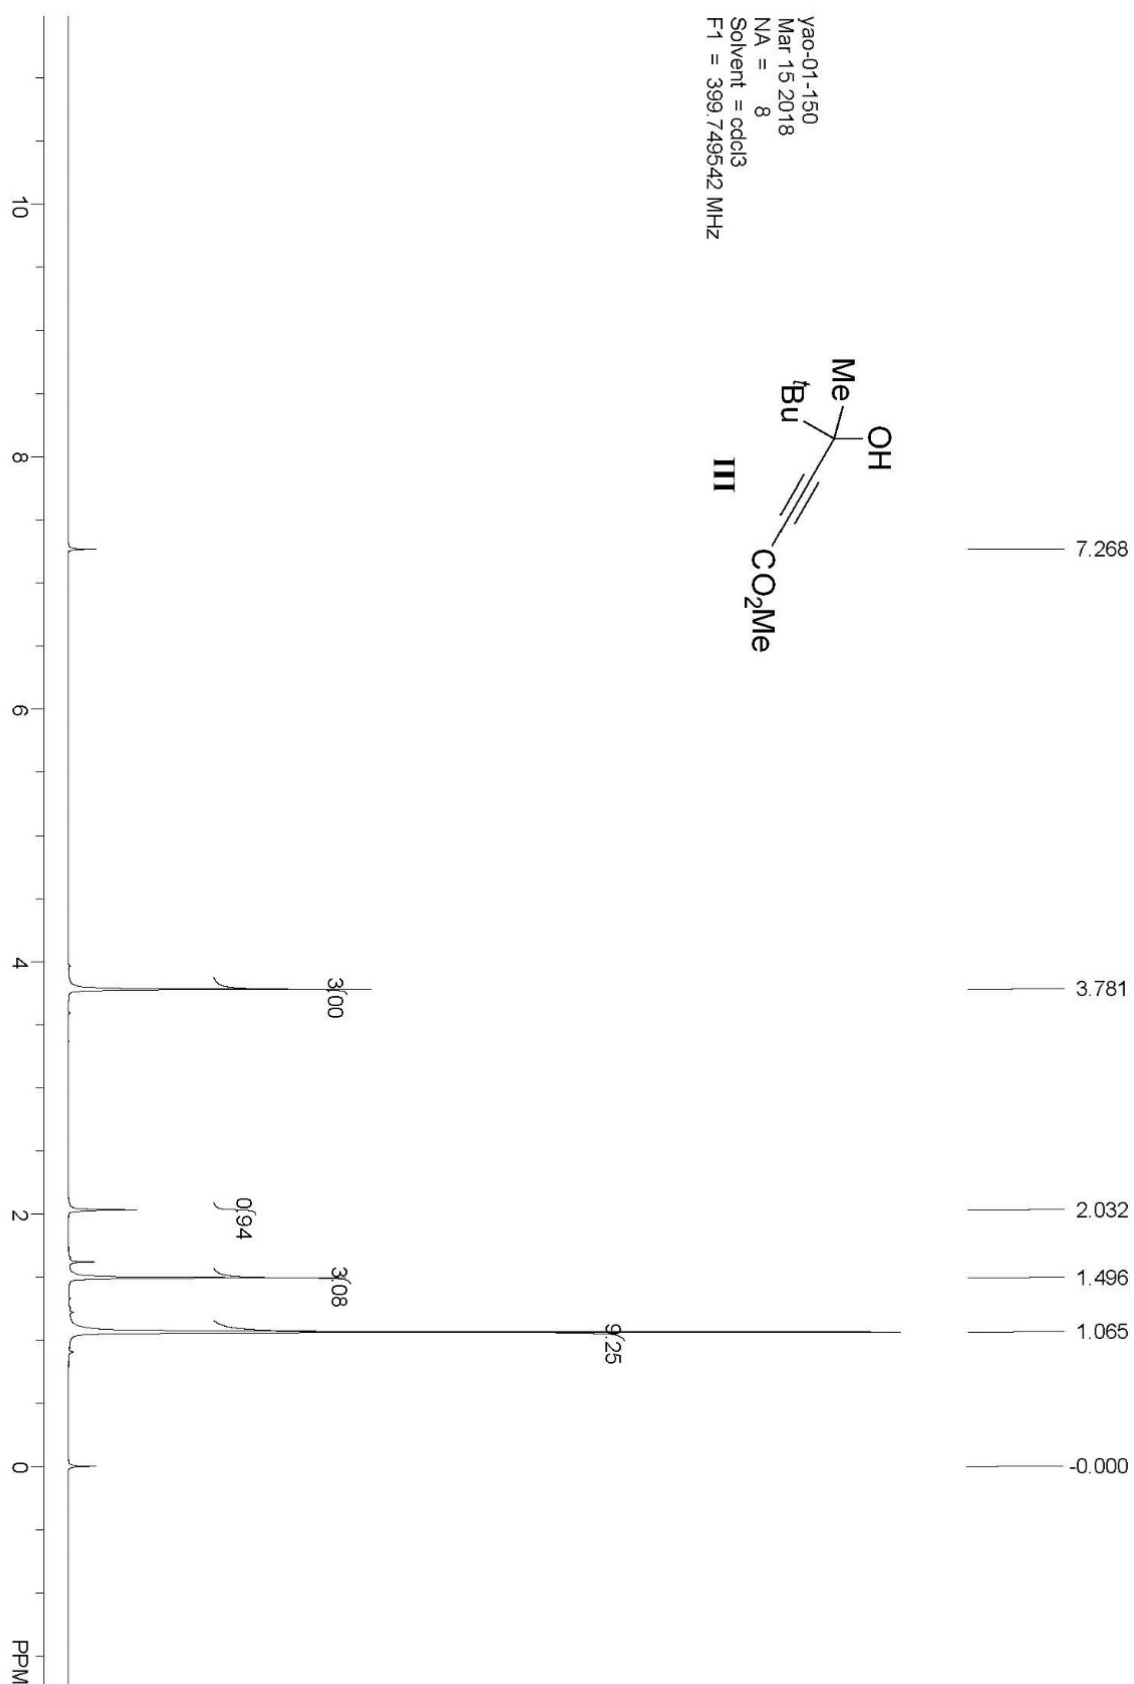

Yao-01-150C  
 Mar 5 2018  
 SOLVENT: cdcl3  
 NA = 256  
 F1 = 100.527567 MHz

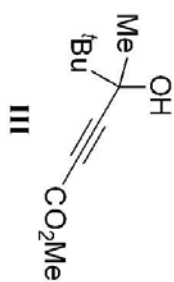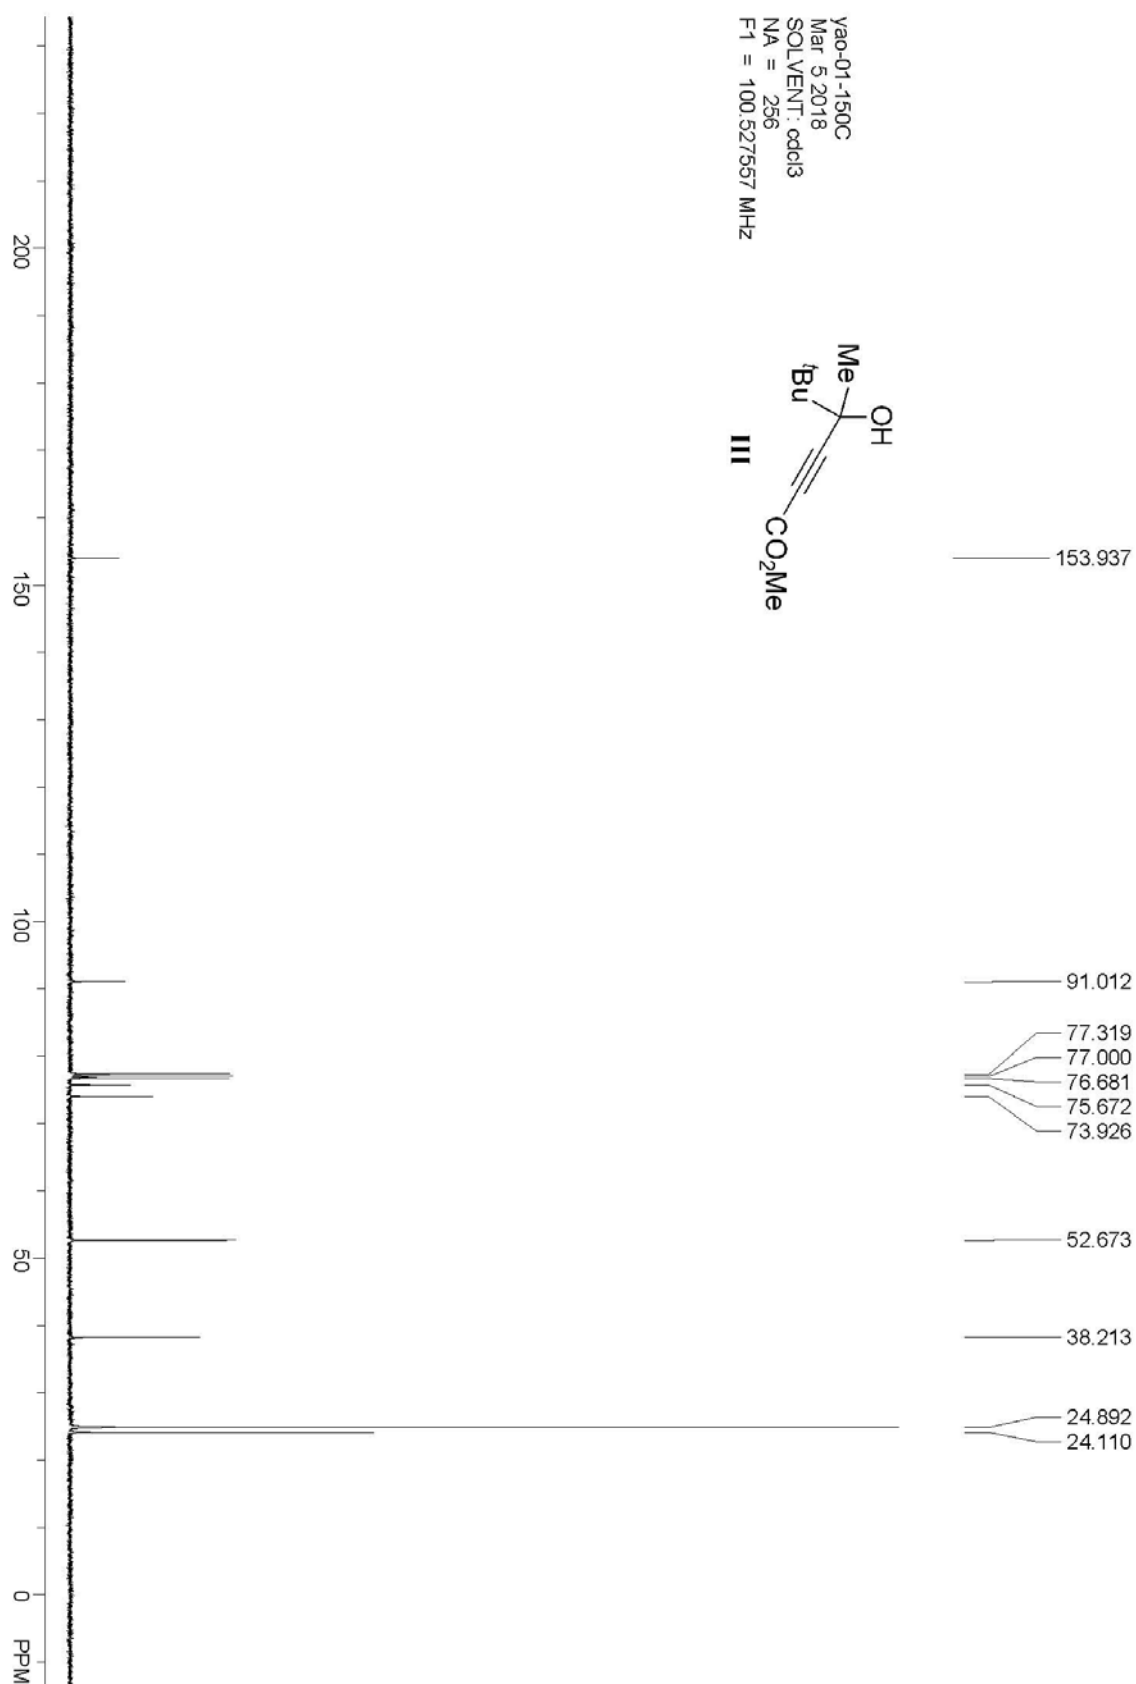

yao-01-151  
 Mar 15 2018  
 SOLVENT: cdcl3  
 NA = 8  
 F1 = 399.749542 MHz

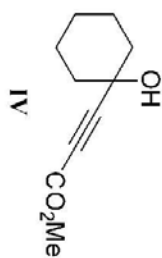

7.266

3.786  
 2.082  
 1.970  
 1.963  
 1.948  
 1.744  
 1.720  
 1.712  
 1.675  
 1.643  
 1.613  
 1.599  
 1.589  
 1.560  
 1.538  
 1.532  
 1.506  
 1.325  
 1.302  
 1.293  
 1.277  
 1.267  
 -0.000

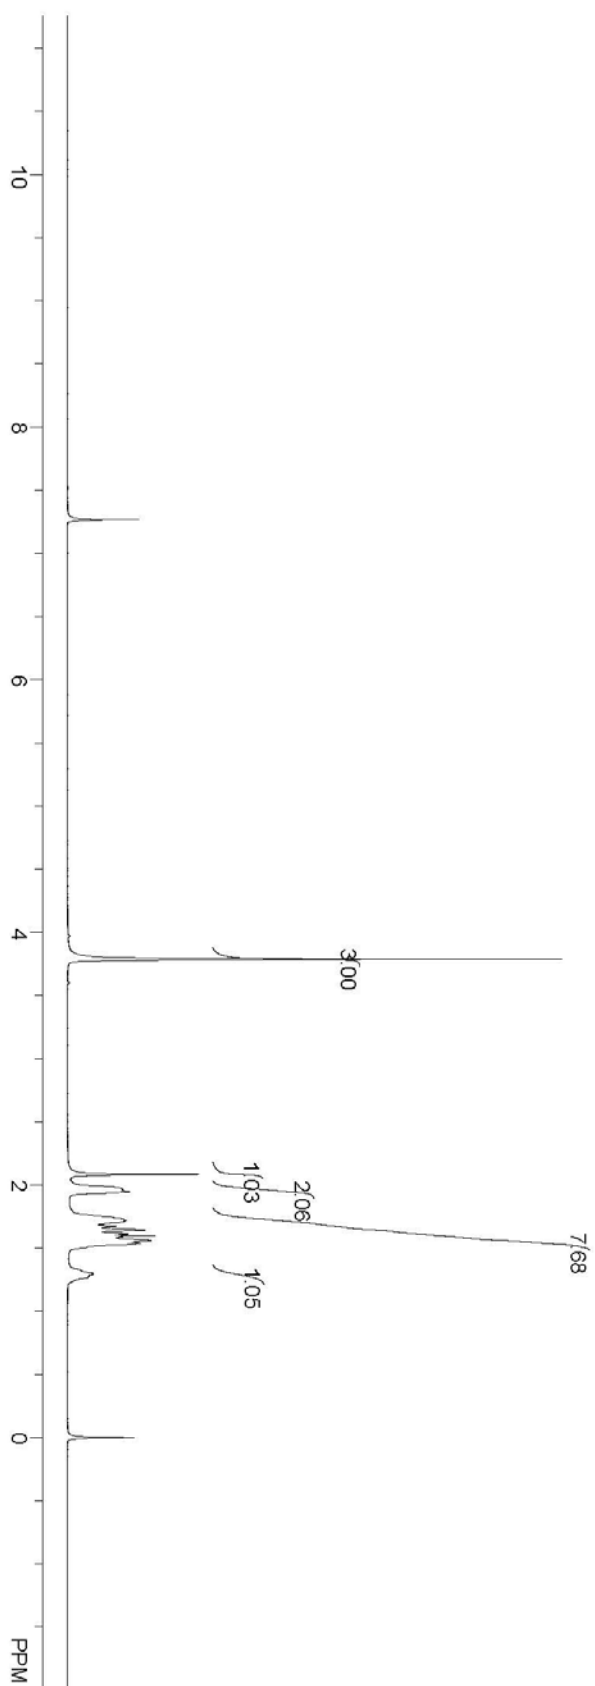

Yao-01-151  
 Mar 5 2018  
 SOLVENT: cdcl3  
 NA = 256  
 F1 = 100.527557 MHz

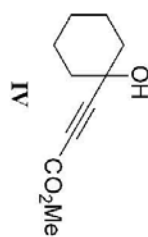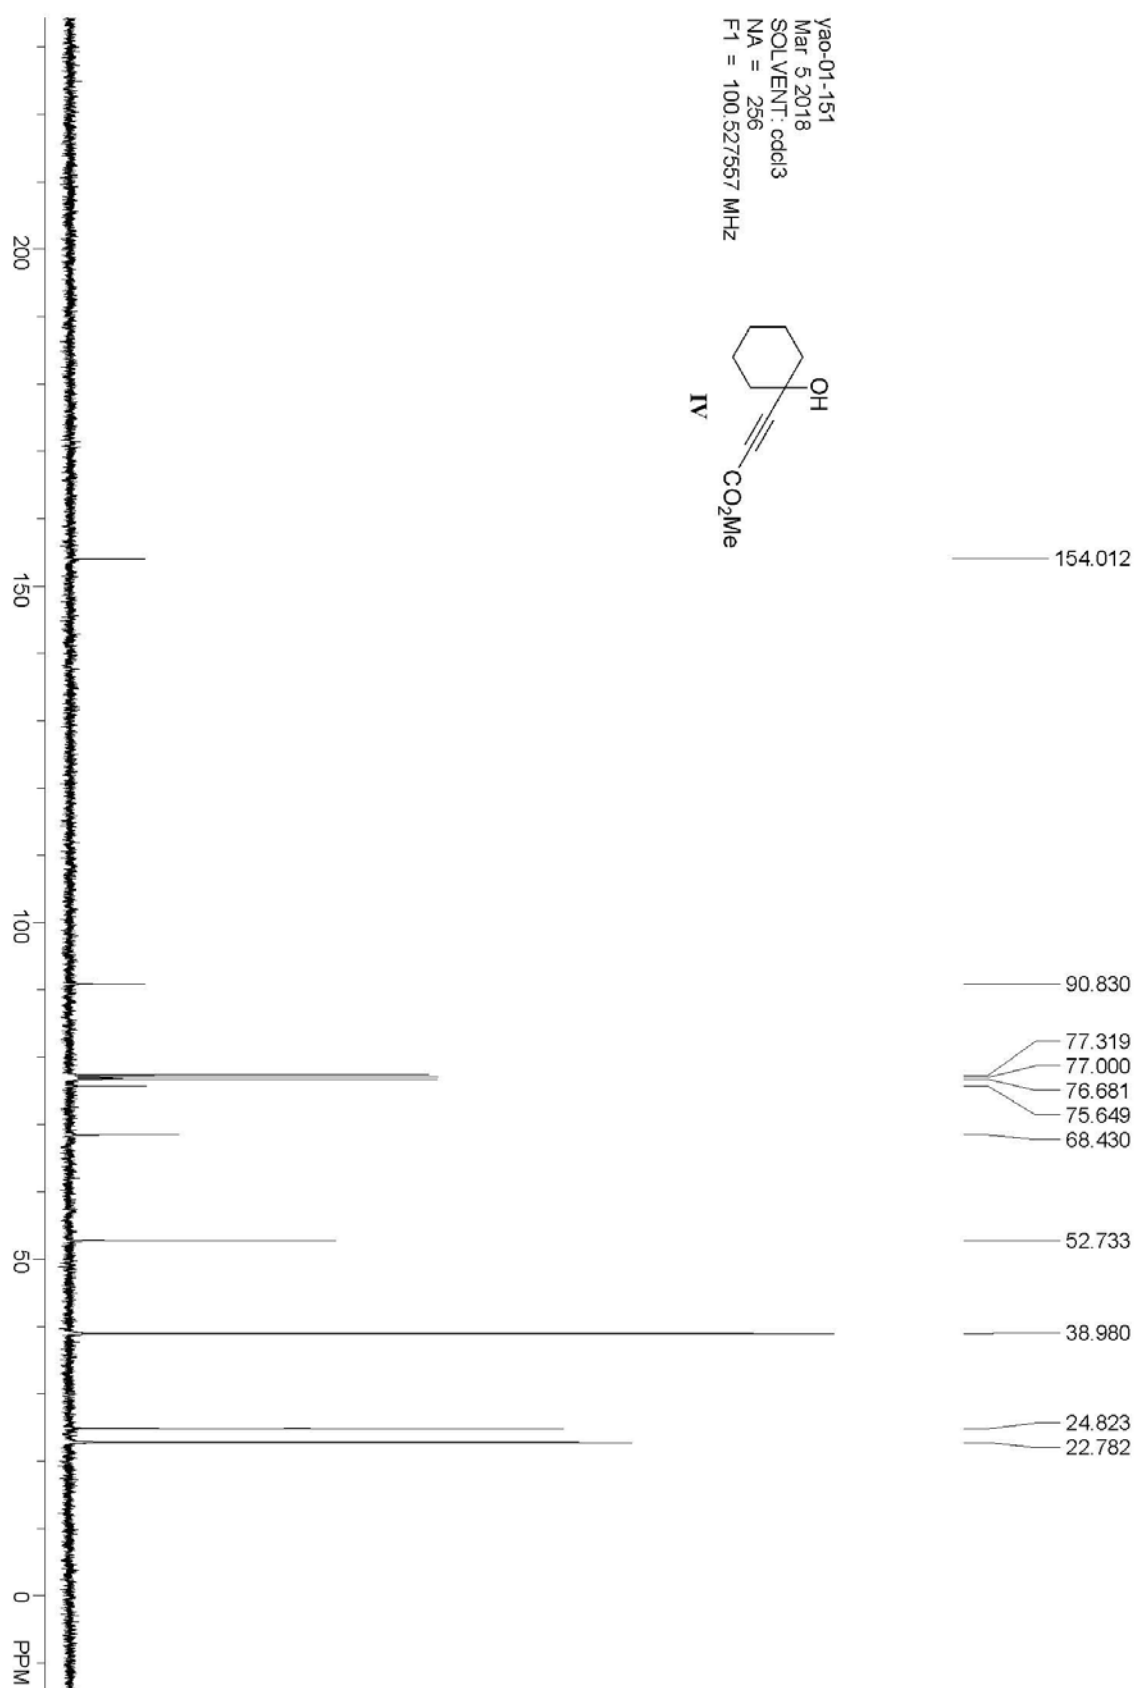

yy-01-027  
Oct 4 2017  
SOLVENT: CDCl3  
NA = 4  
F1 = 399.722809 MHz

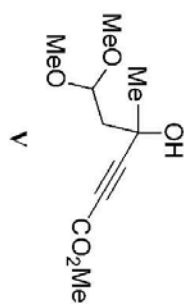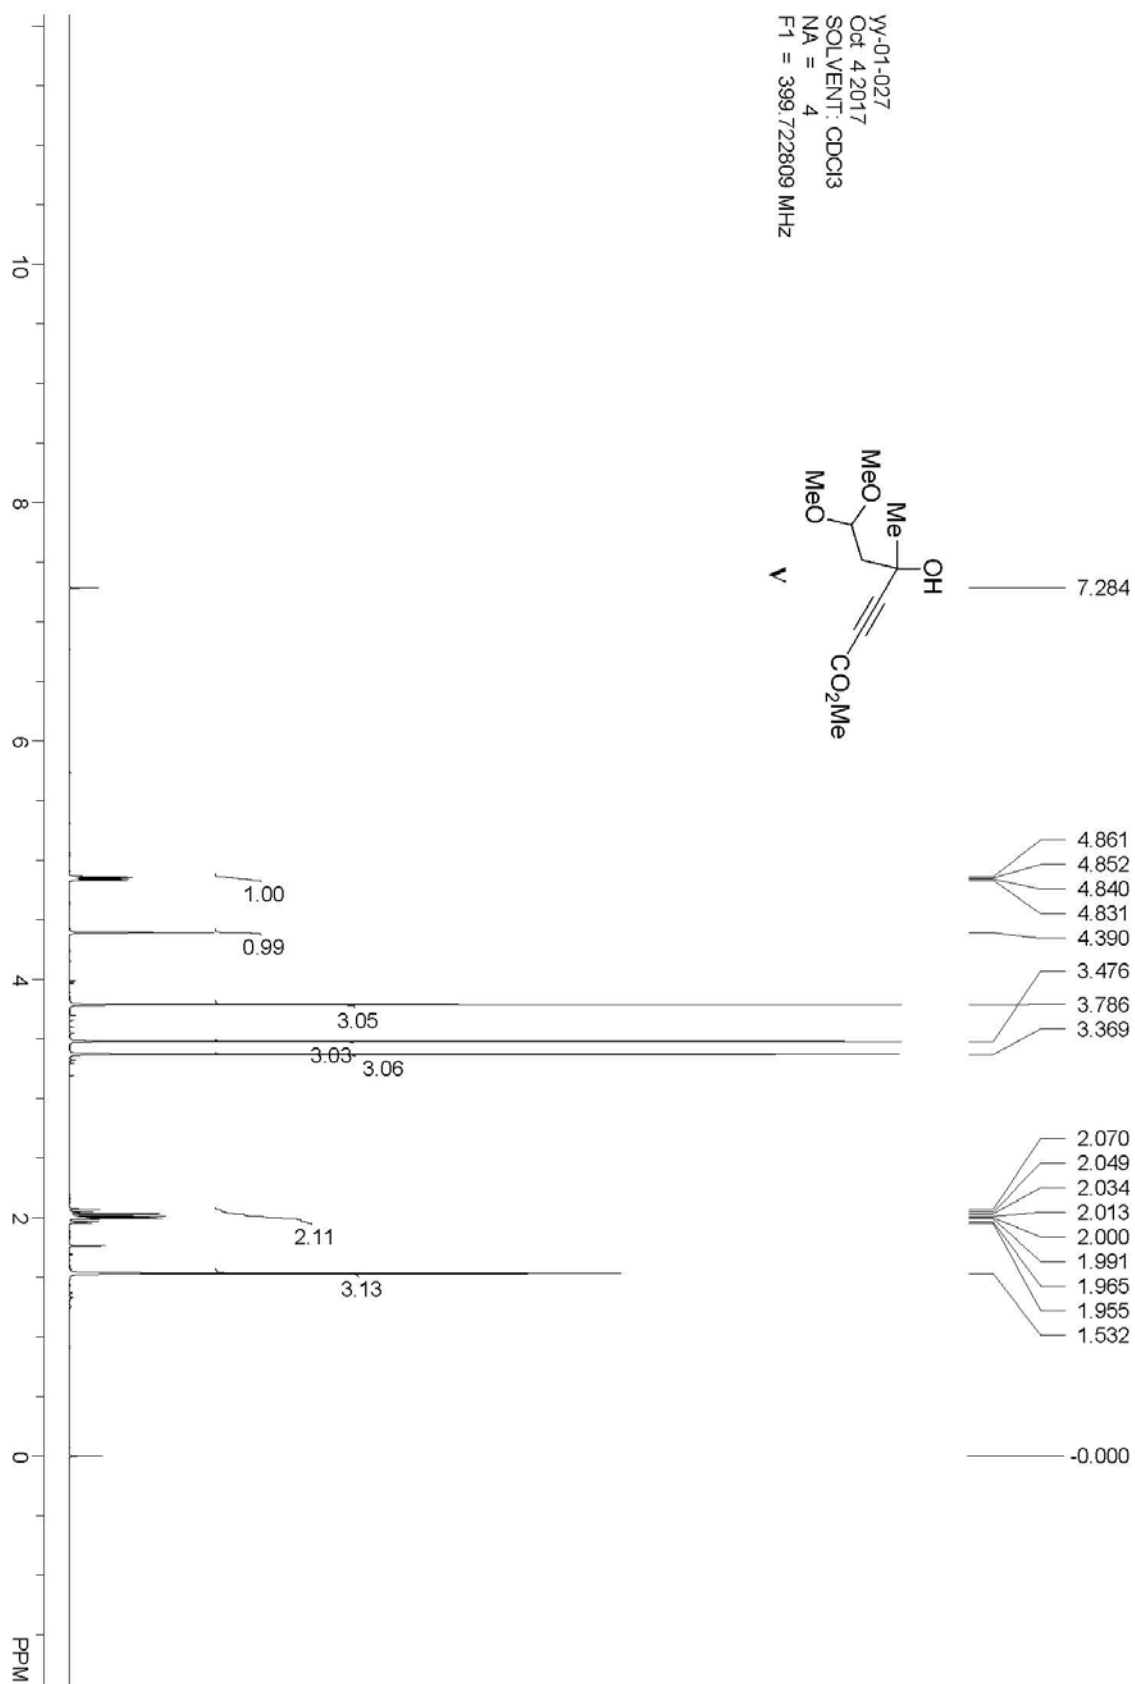

yao-01-027C  
 Oct 4 2017  
 SOLVENT: cdcl3  
 NA = 100  
 F1 = 100.520737 MHz

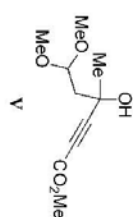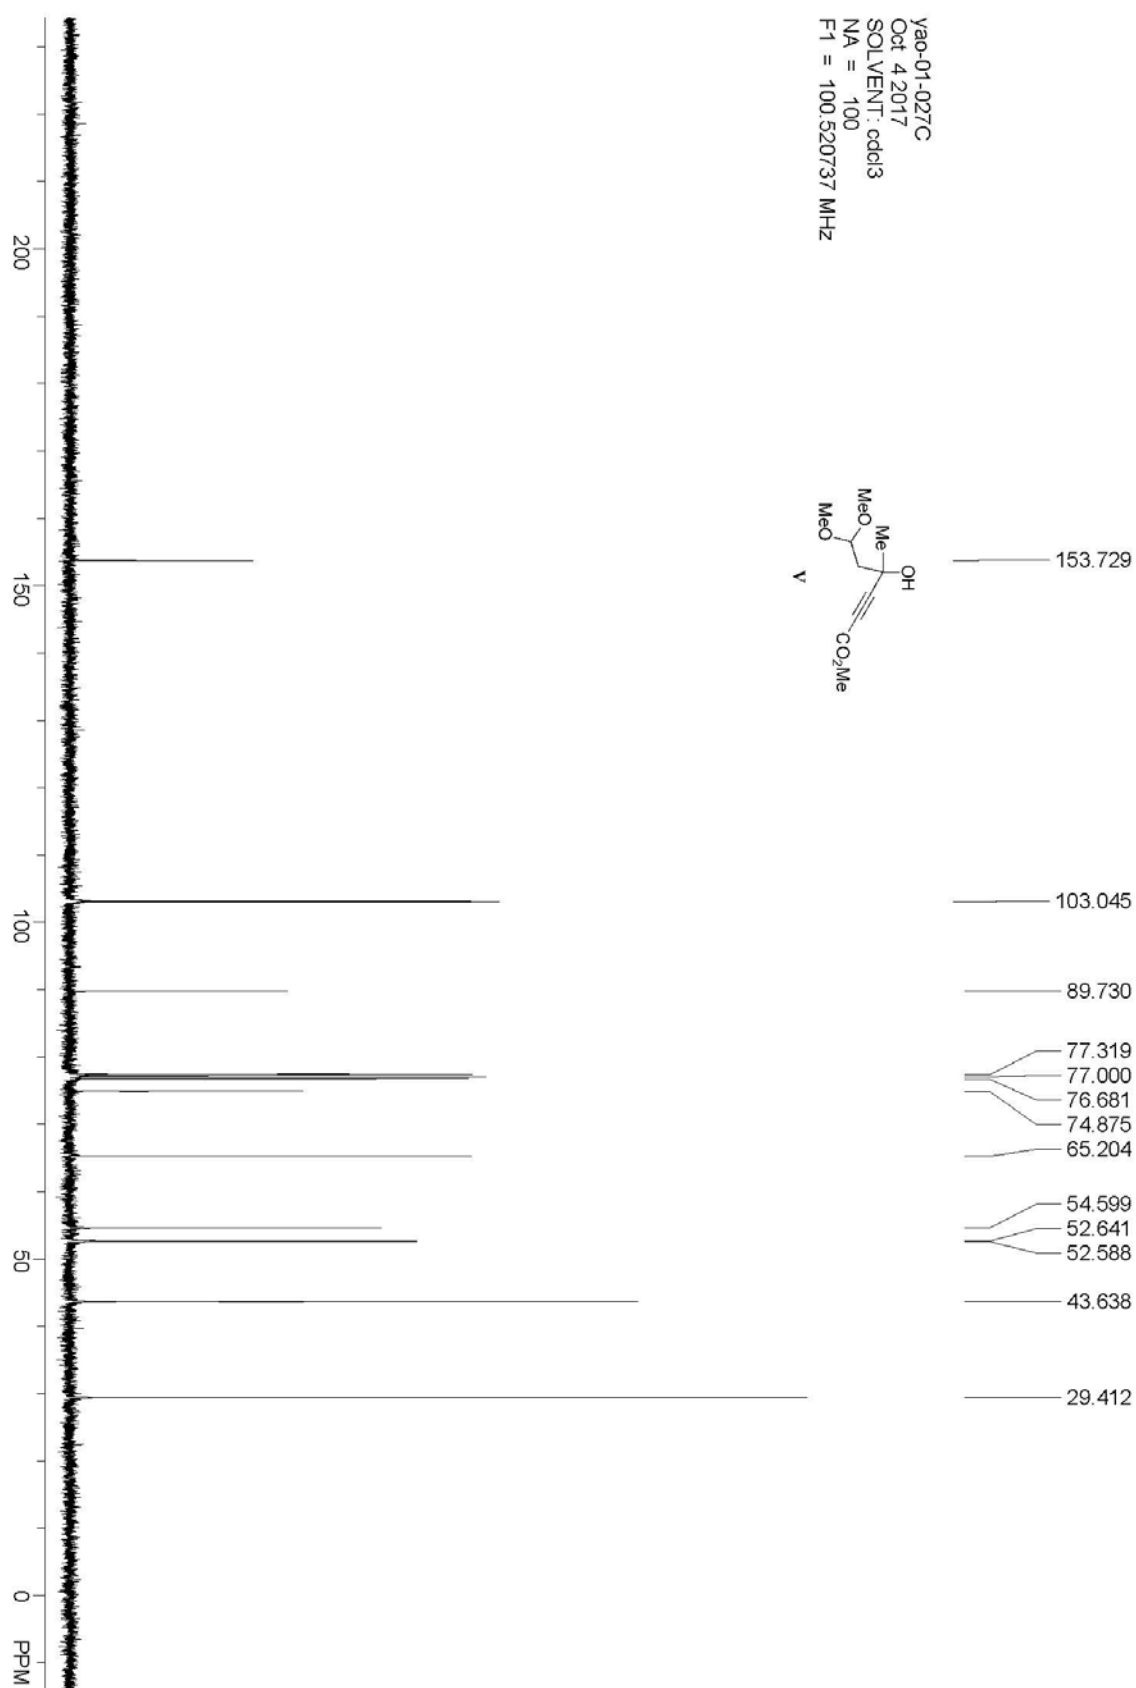

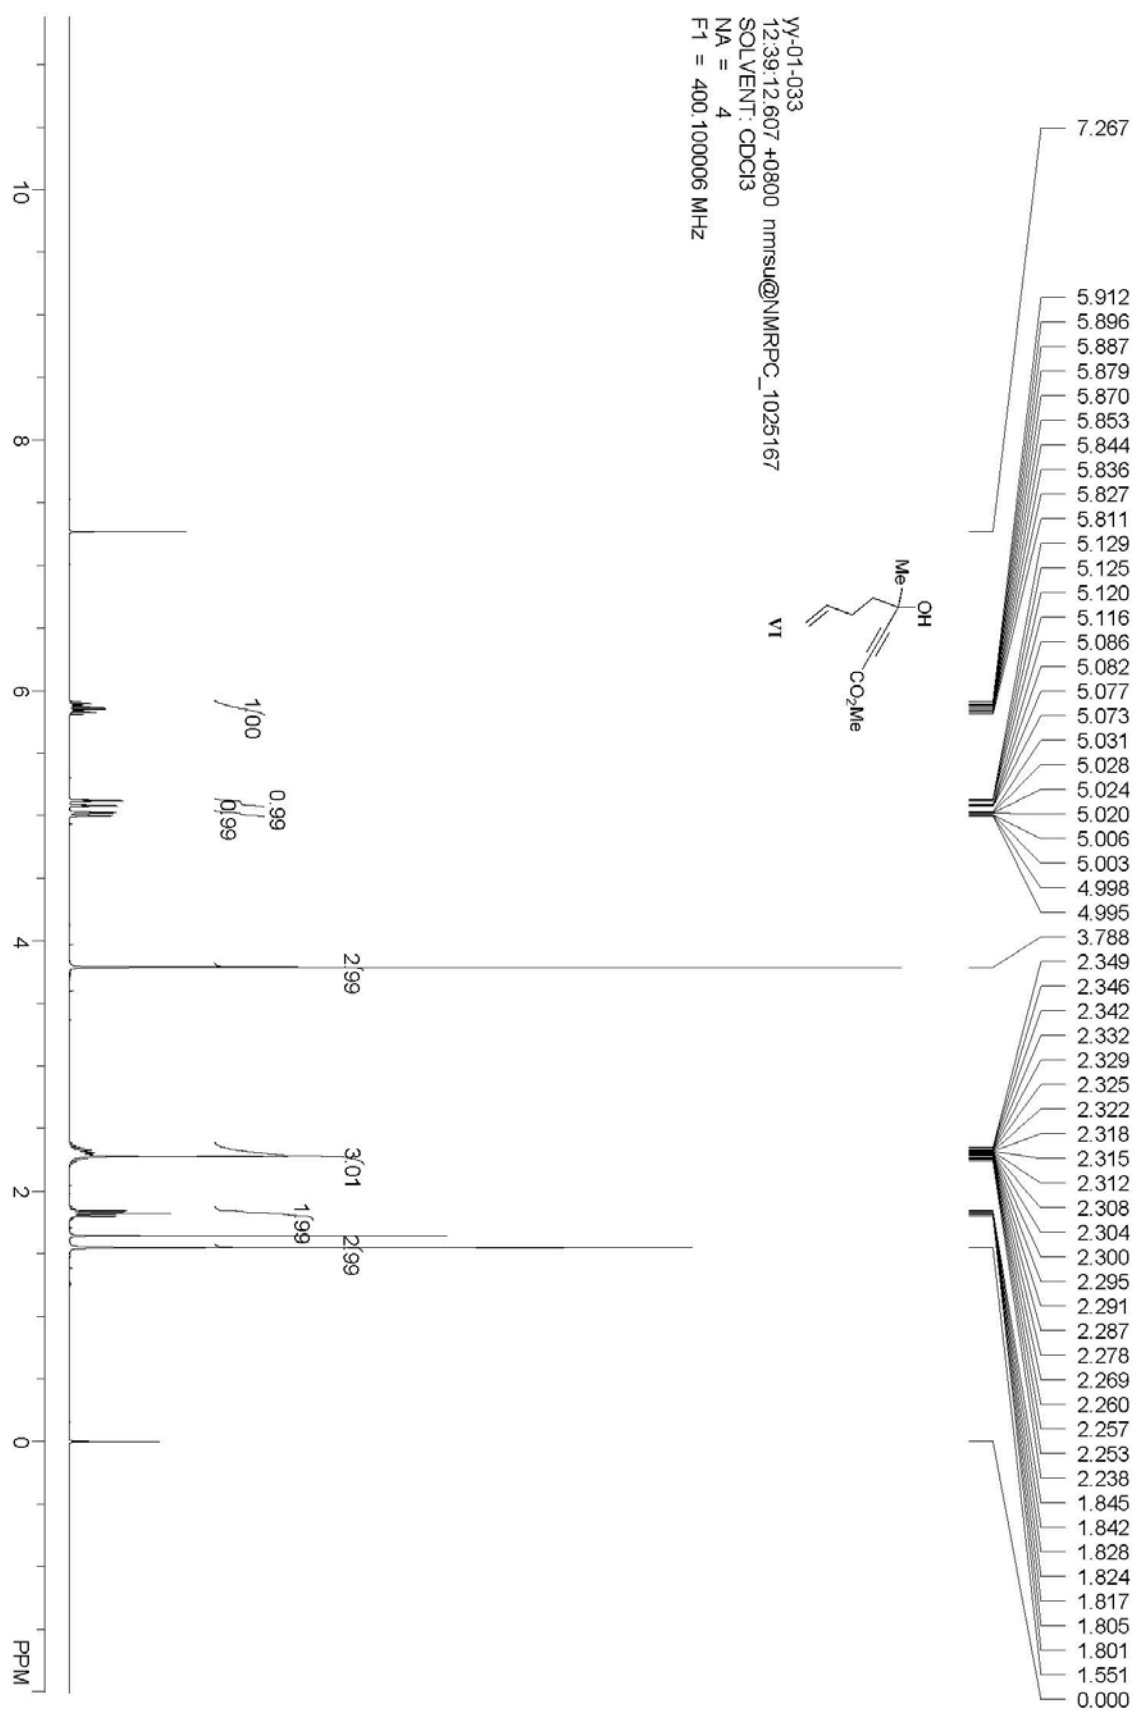

yy-01-033C  
 12:54:11.012 +0800 nmrsu@NMRPC\_1025167  
 USER: nmrsu  
 SOLVENT: CDCl3  
 NA = 300  
 F1 = 100.605225 MHz

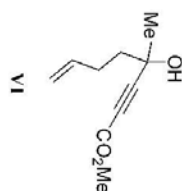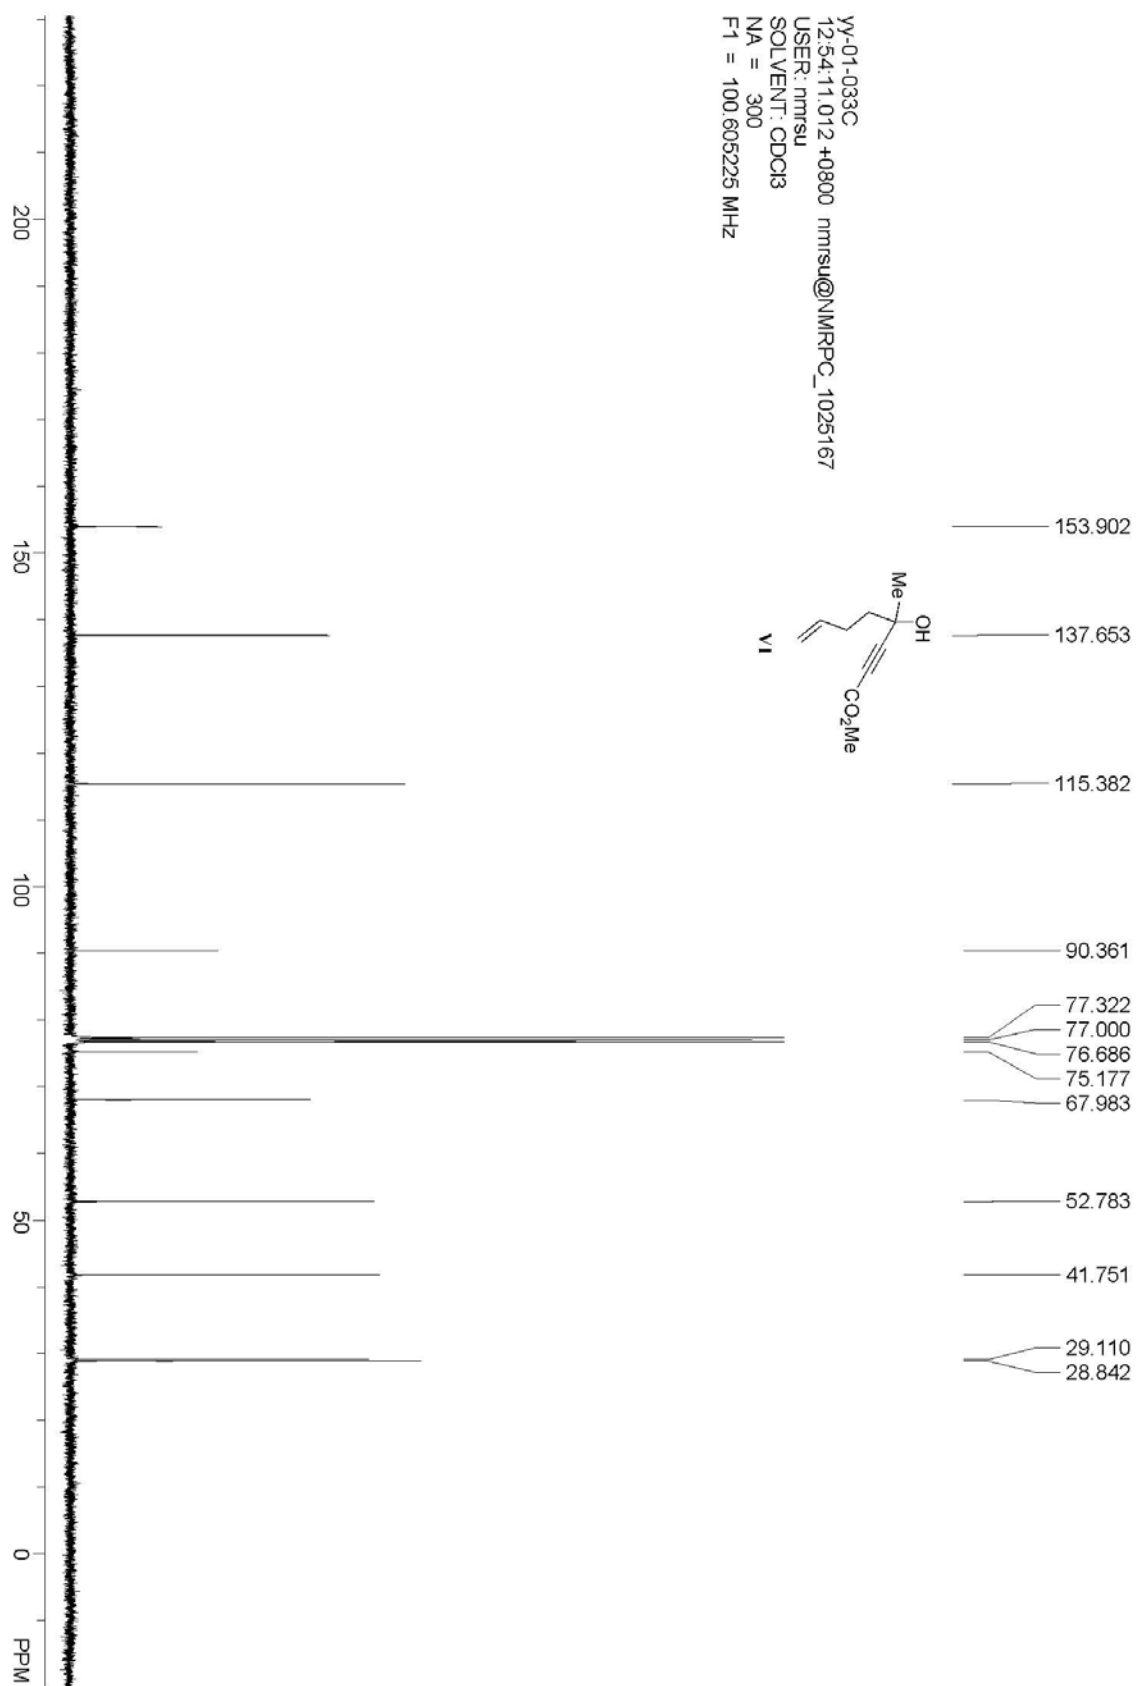

yy-01-018  
 Sep 25 2017  
 SOLVENT: cdcl3  
 NA = 4  
 F1 = 399.749542 MHz

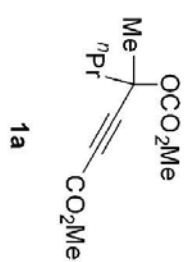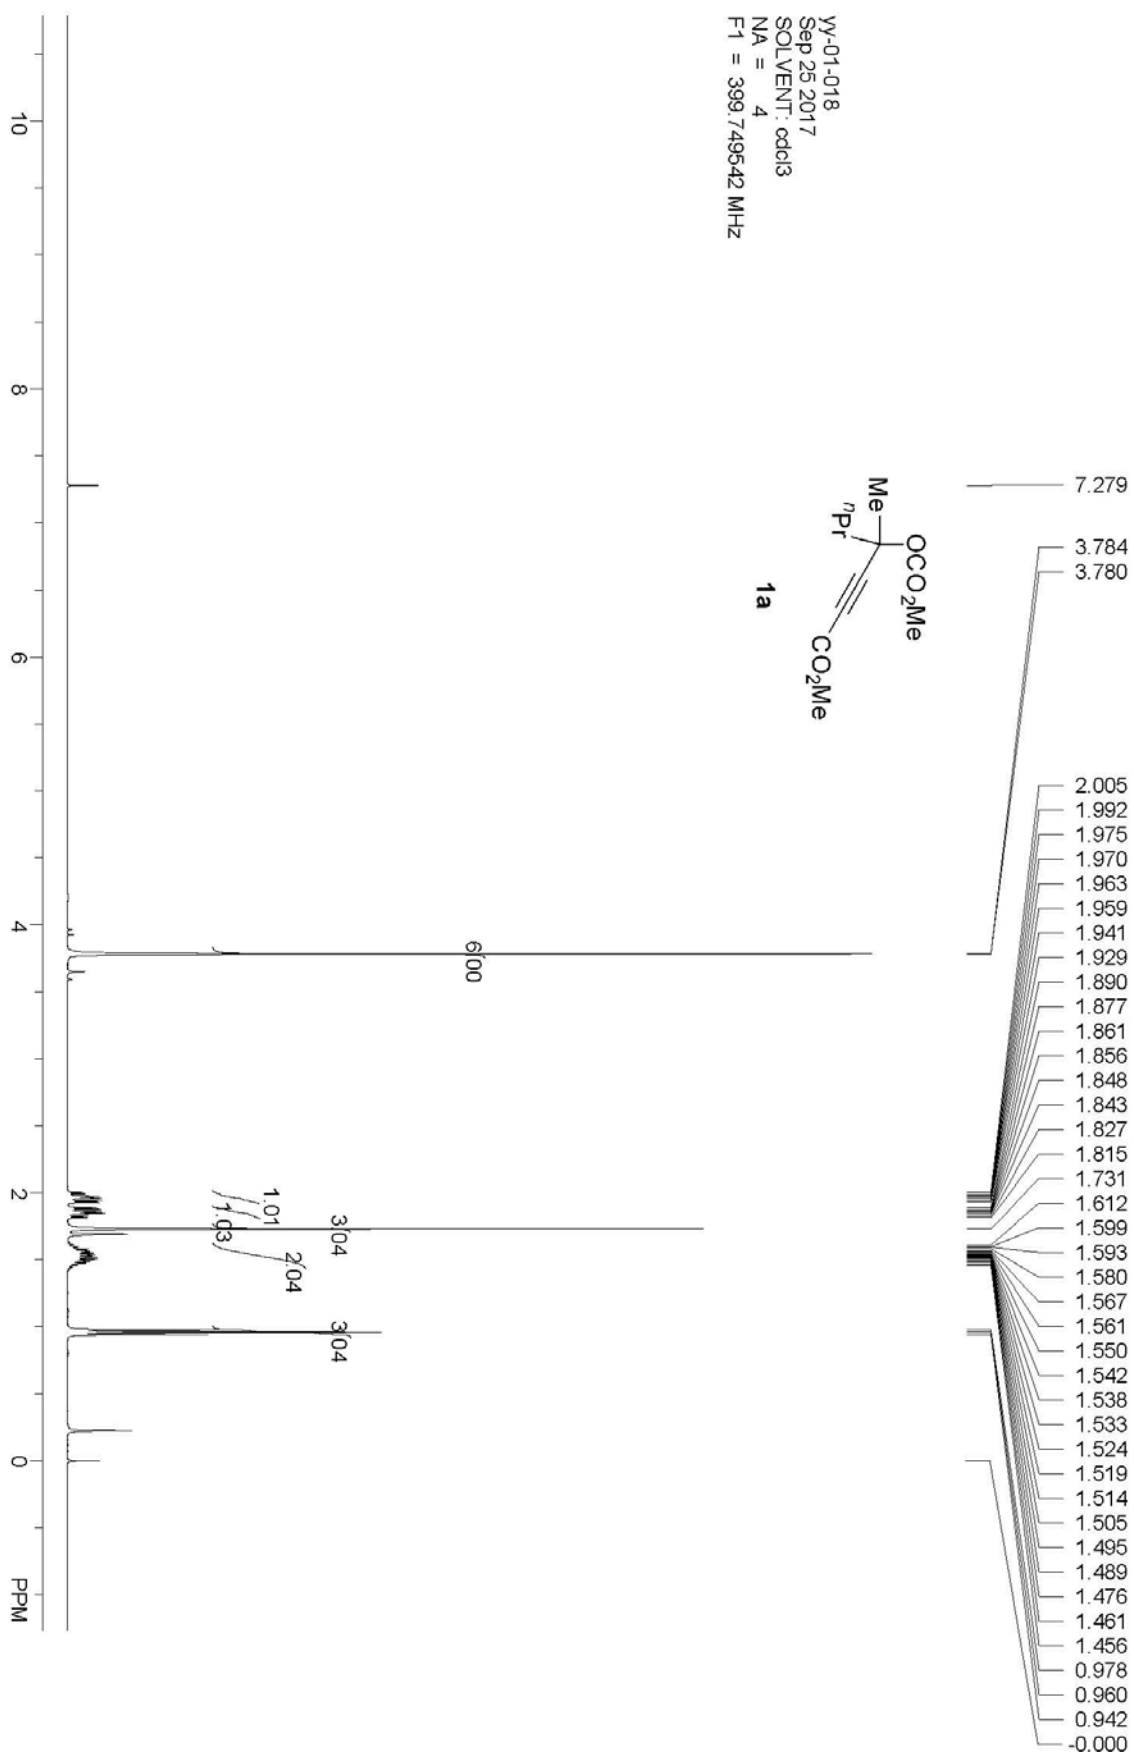

YV-01-018C  
 Sep 23 2017  
 SOLVENT: cdcl3  
 NA = 256  
 F1 = 100.527557 MHz

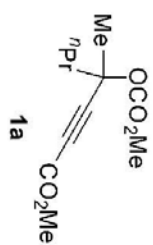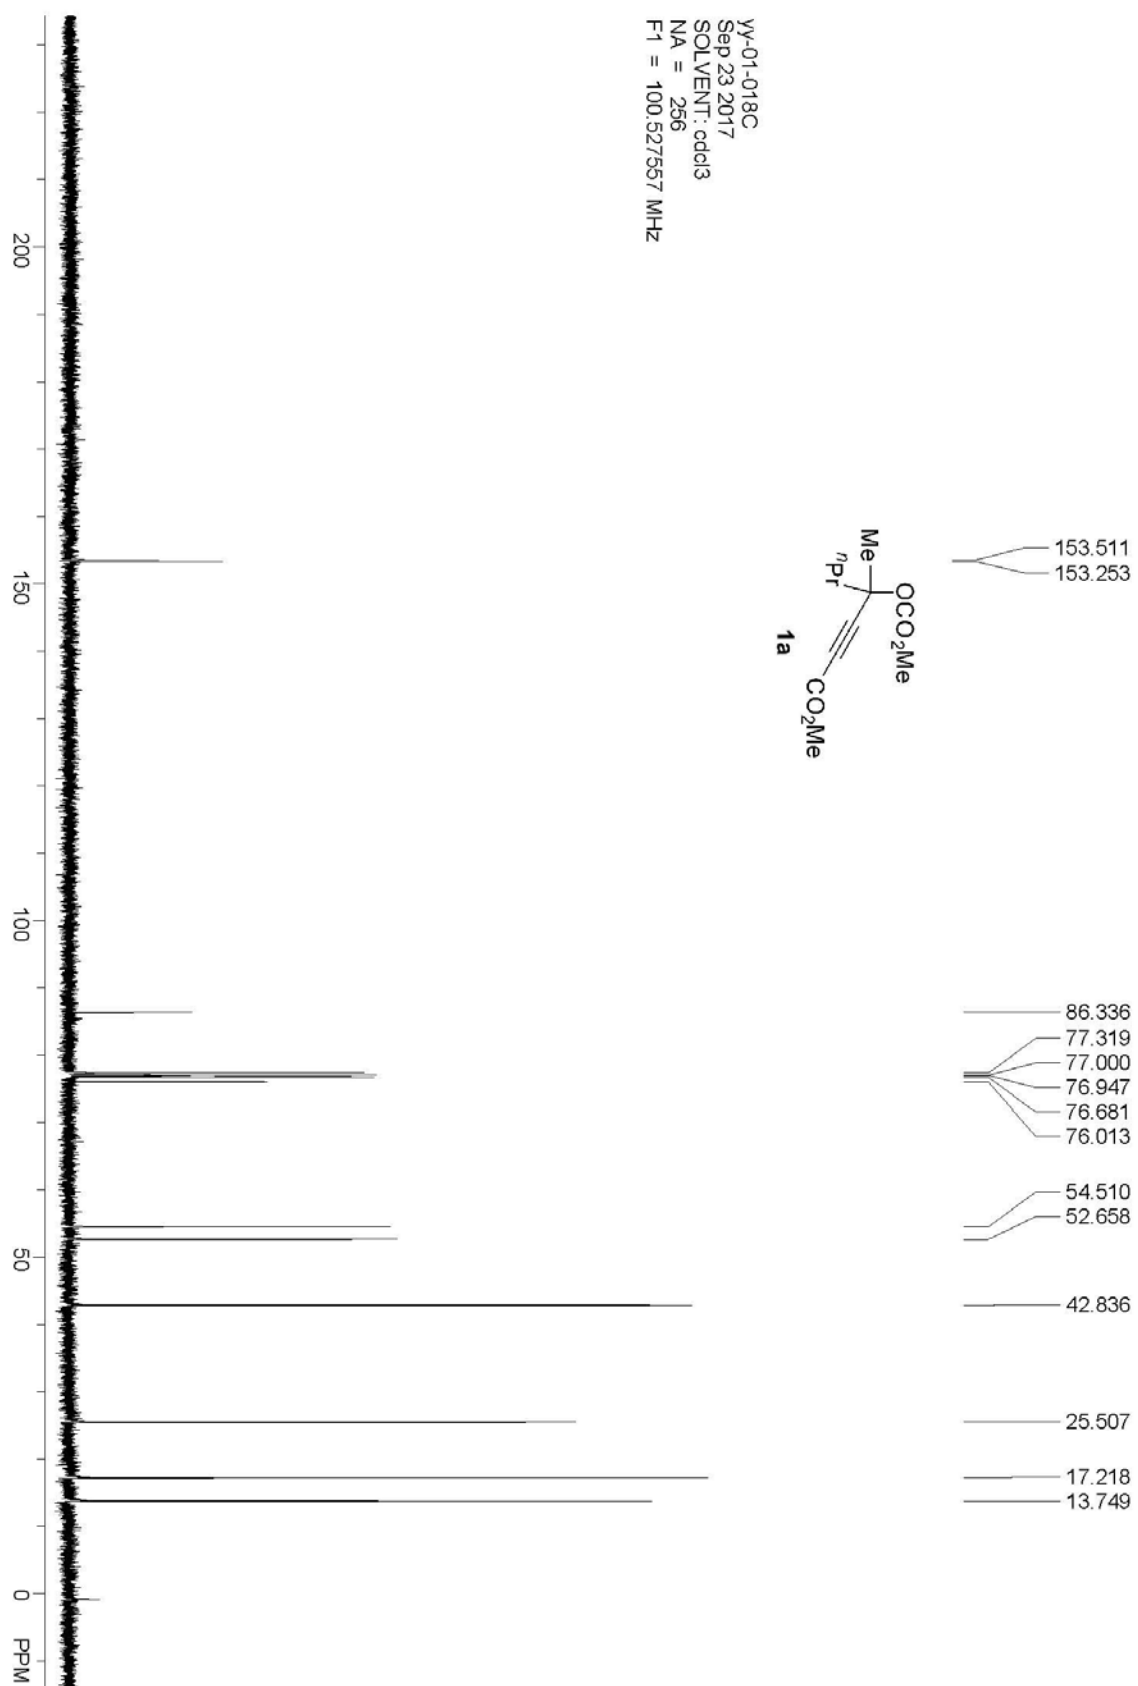

yy-01-020  
 11:25:54.762 +0800 nmisu@NMIRPC\_1025167  
 SOLVENT: CDCl3  
 NA = 16  
 F1 = 400.100006 MHz

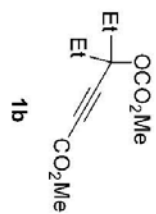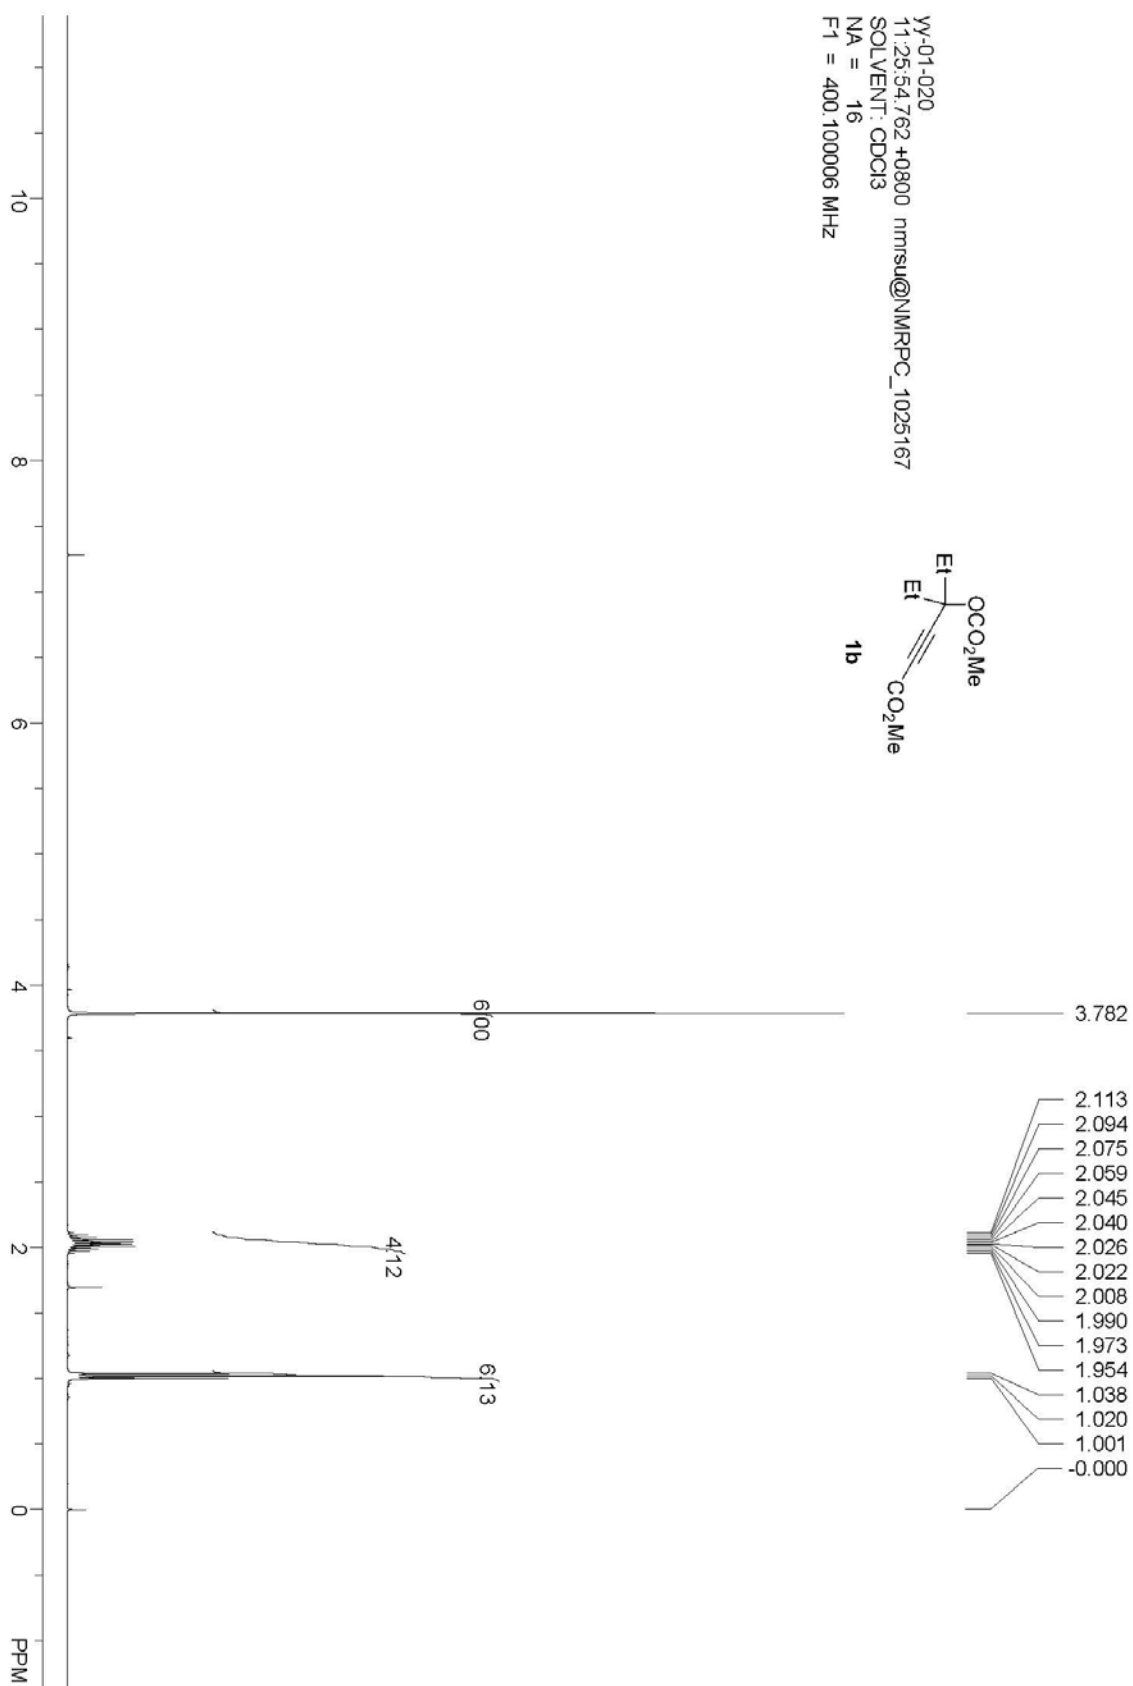

WY-01-020C  
 11:32:01.987 +0800  
 SOLVENT: CDCl<sub>3</sub>  
 NA = 128  
 F1 = 100.605225 MHz

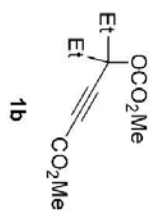

153.596  
 153.274

85.757  
 80.325  
 77.973  
 77.322  
 77.000  
 76.686

54.584  
 52.714

30.190

8.027

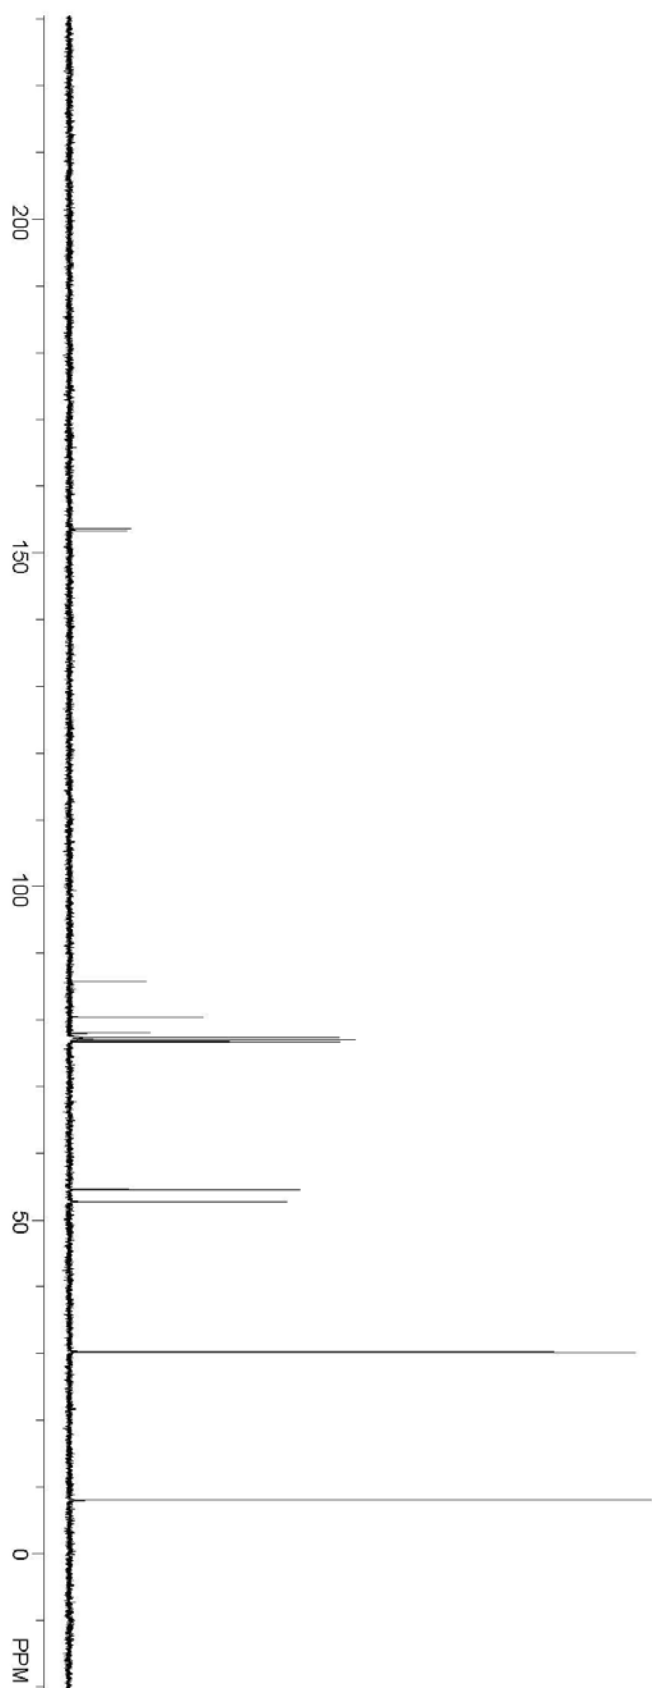

WY-01-026  
Oct 3 2017  
SOLVENT: CDCl3  
NA = 8  
F1 = 399.722809 MHz

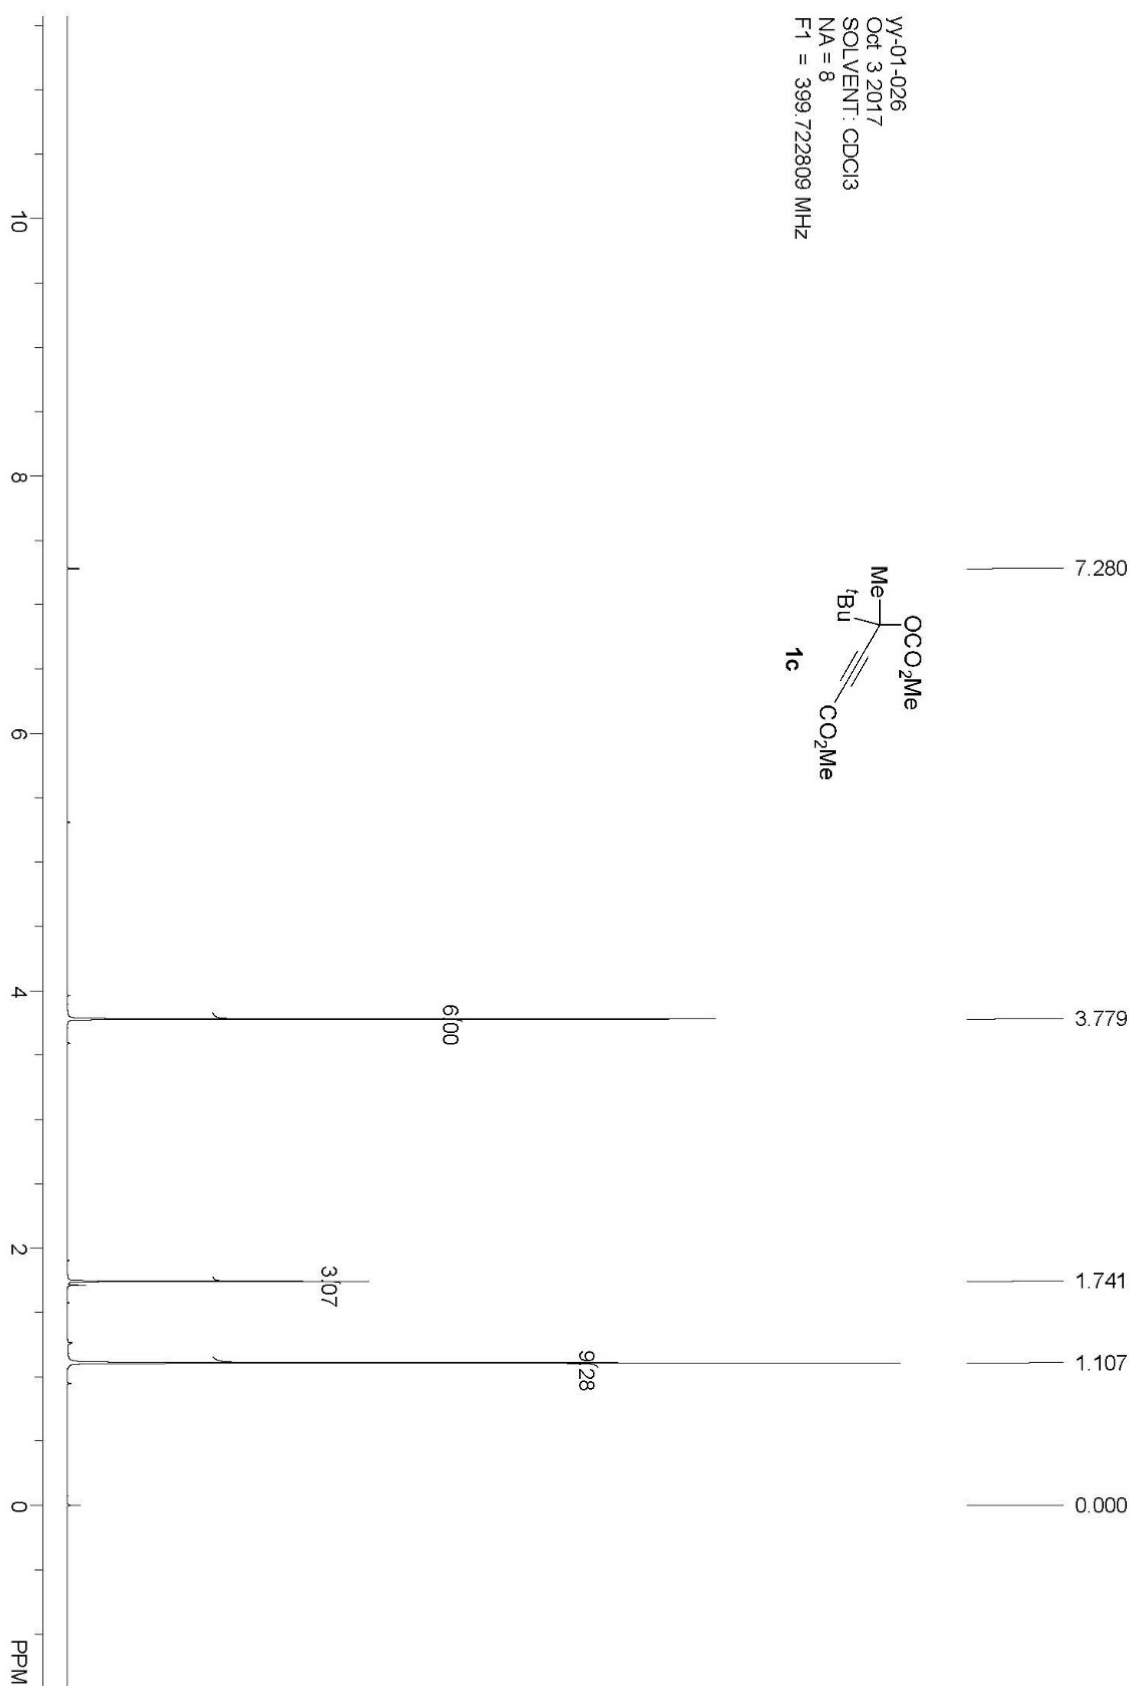

WY-01-26C  
Oct 2 2017  
SOLVENT: cdcl3  
NA = 420  
F1 = 100.520737 MHz

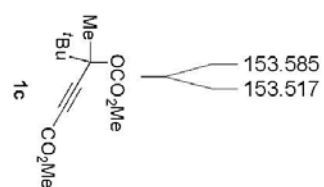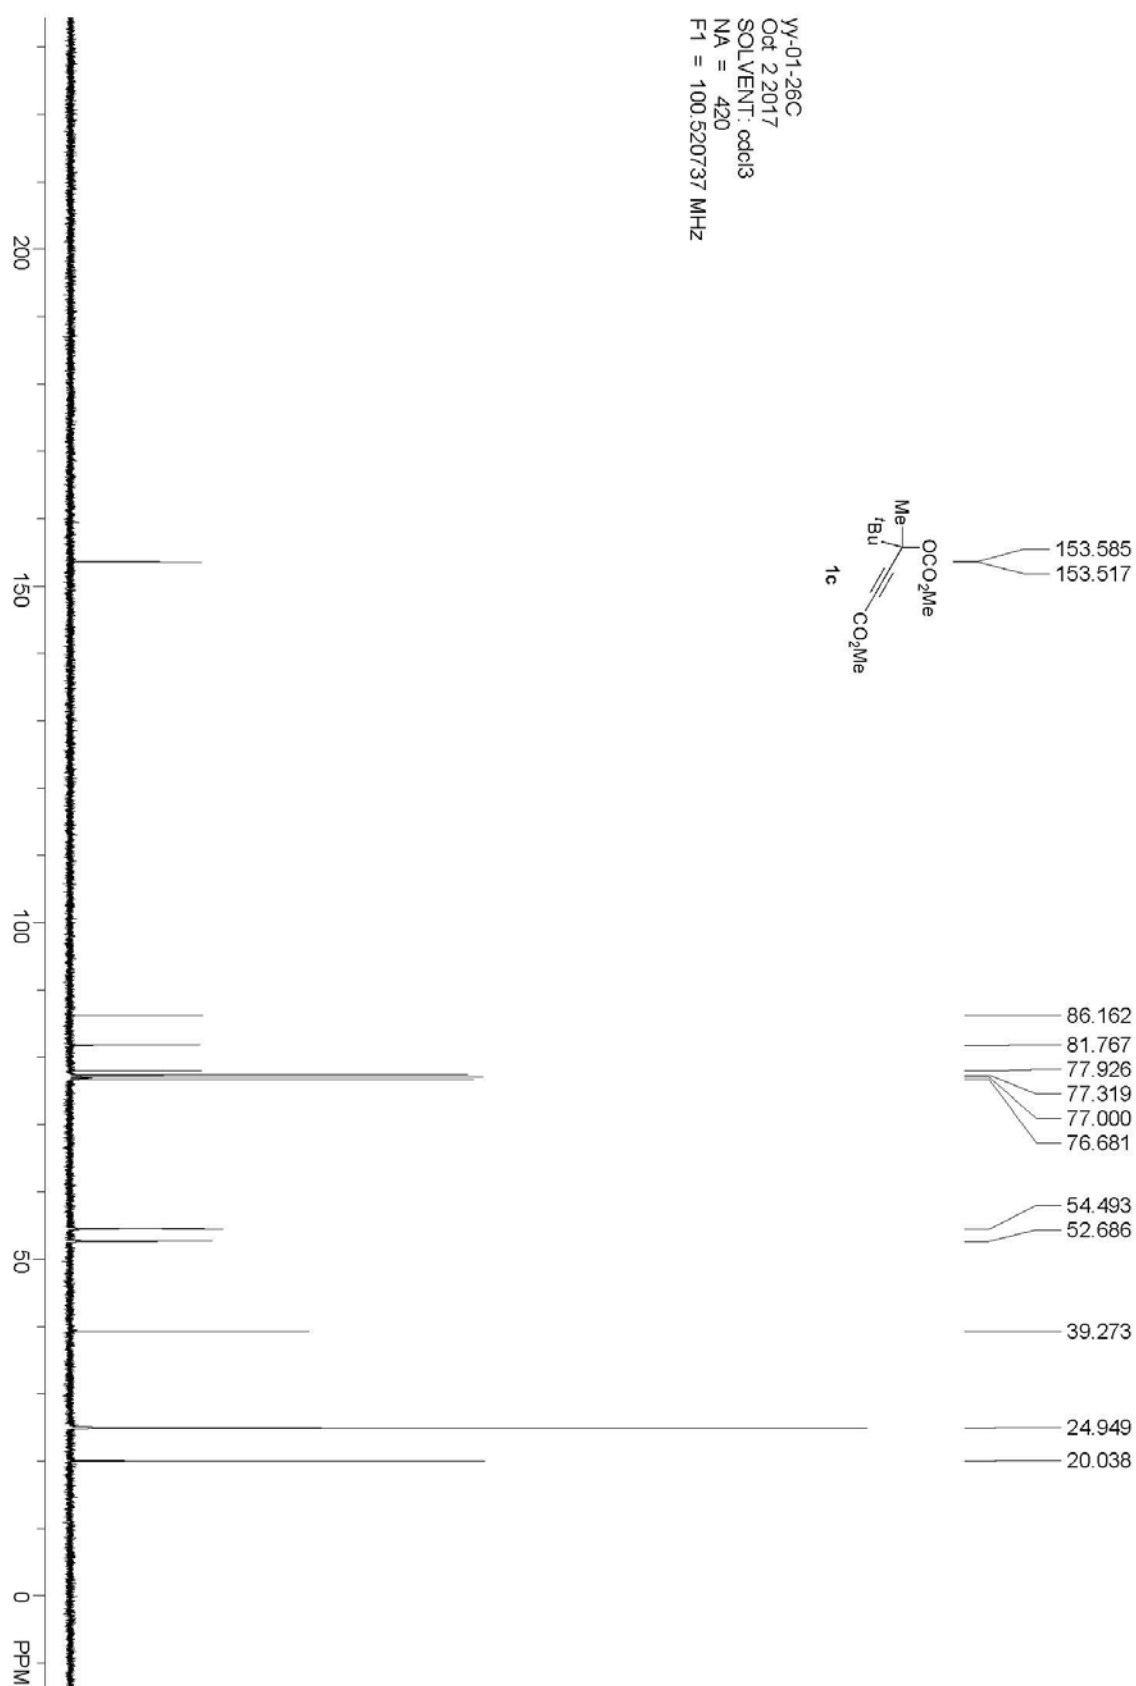

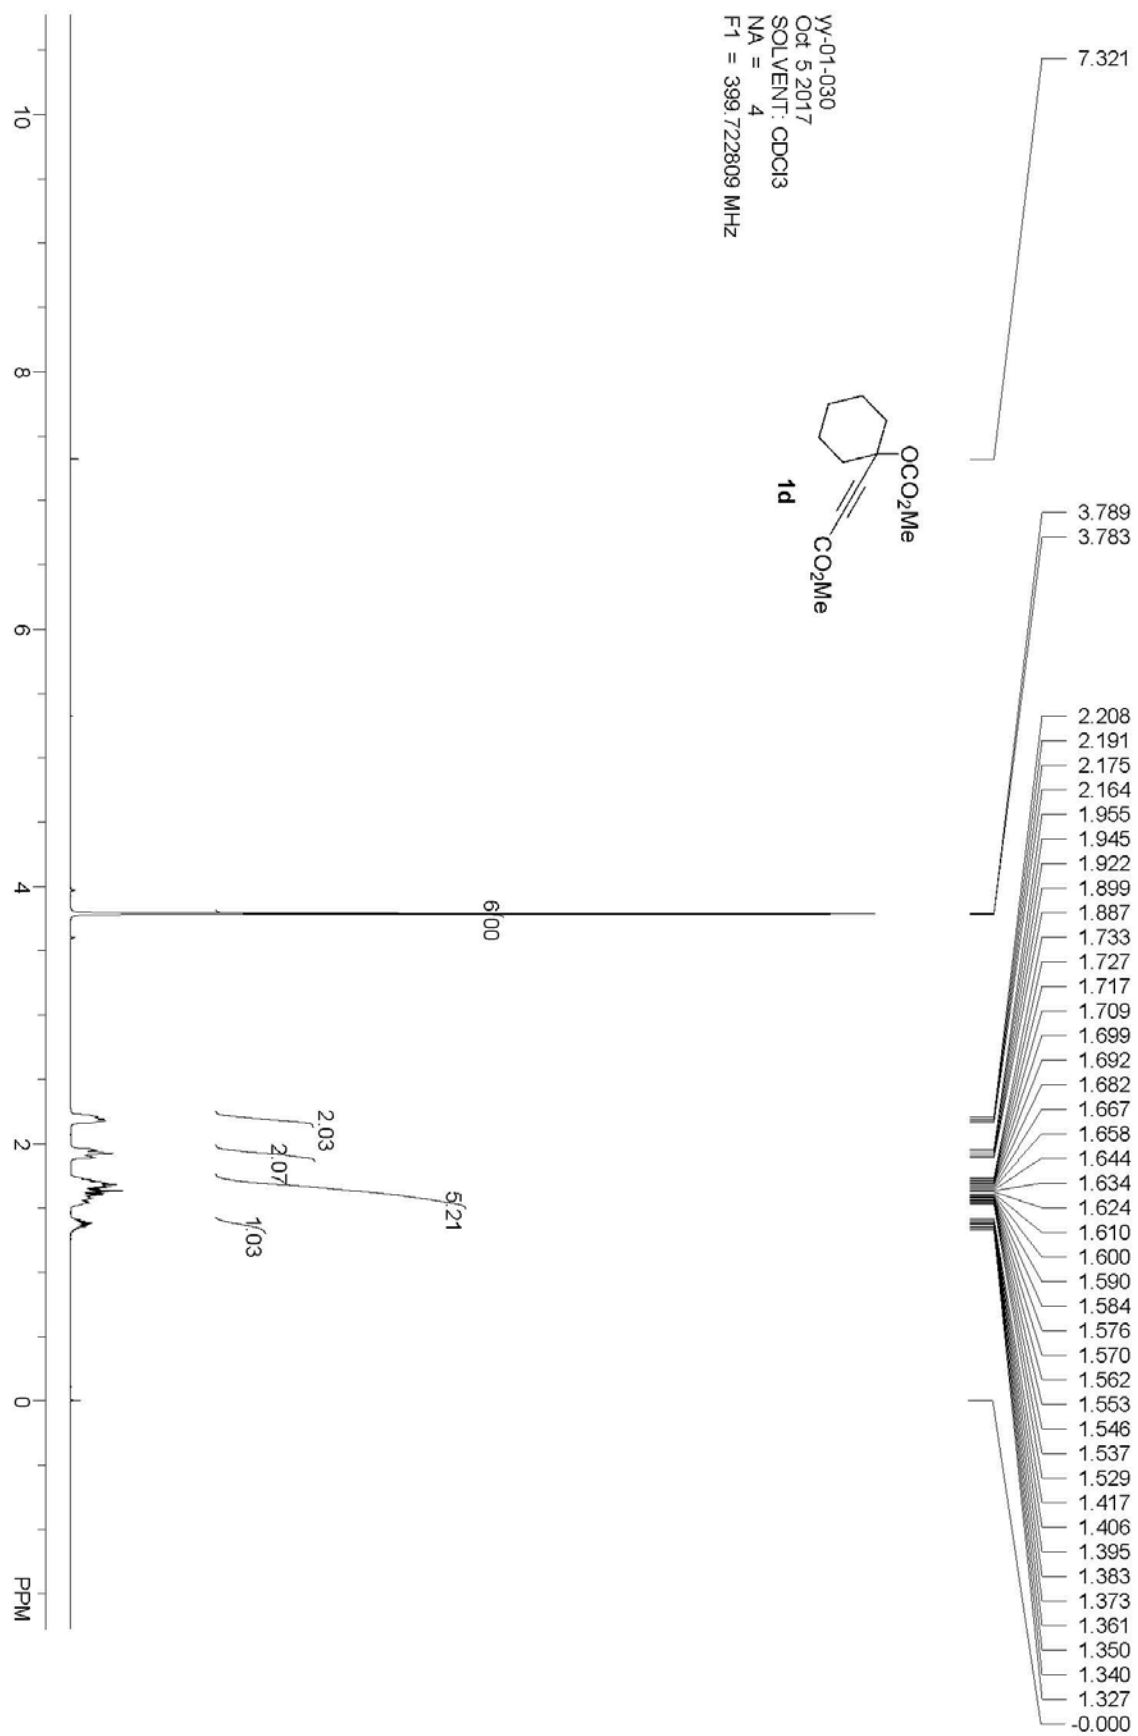

yy-01-030C  
 Oct 5 2017  
 SOLVENT: cdcl3  
 NA = 52  
 F1 = 100.520737 MHz

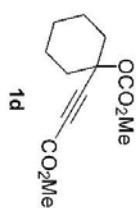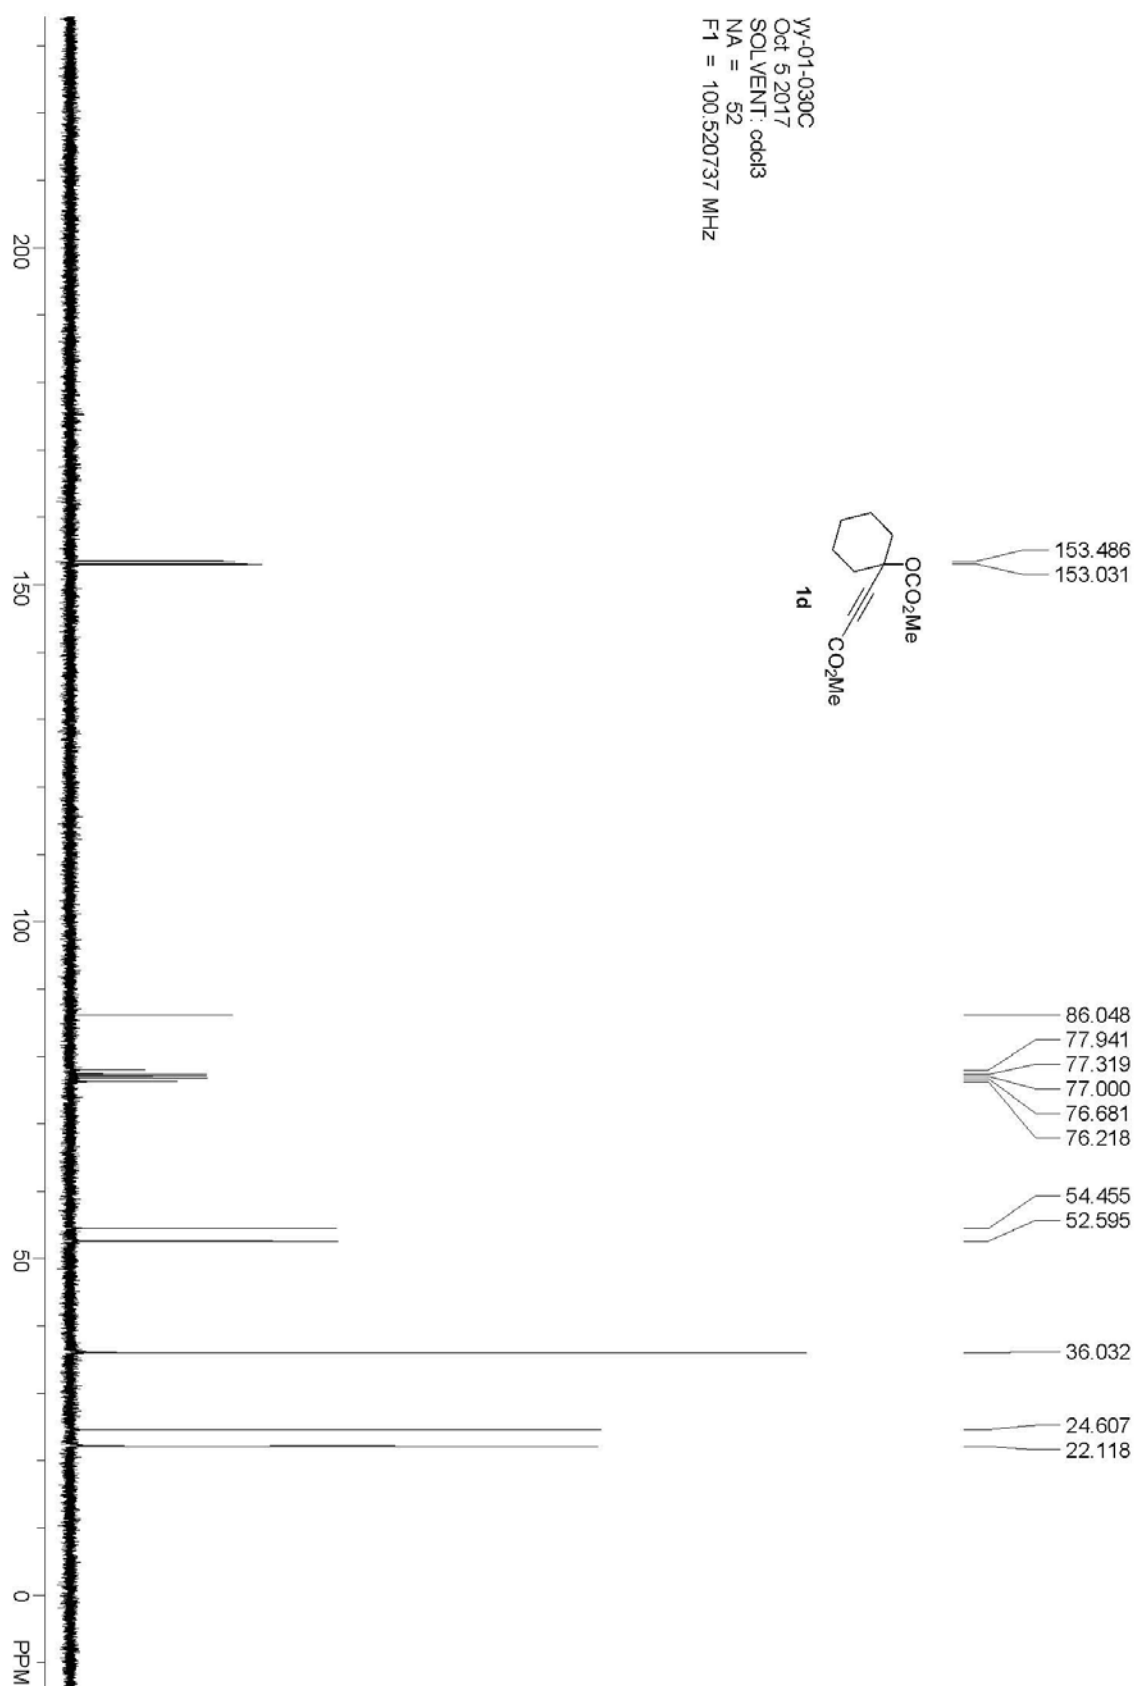

WY-1-35  
Oct 12 2017  
SOLVENT: cdcl3  
NA = 8  
F1 = 399.749542 MHz

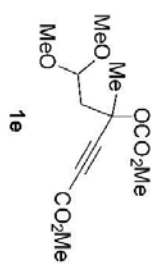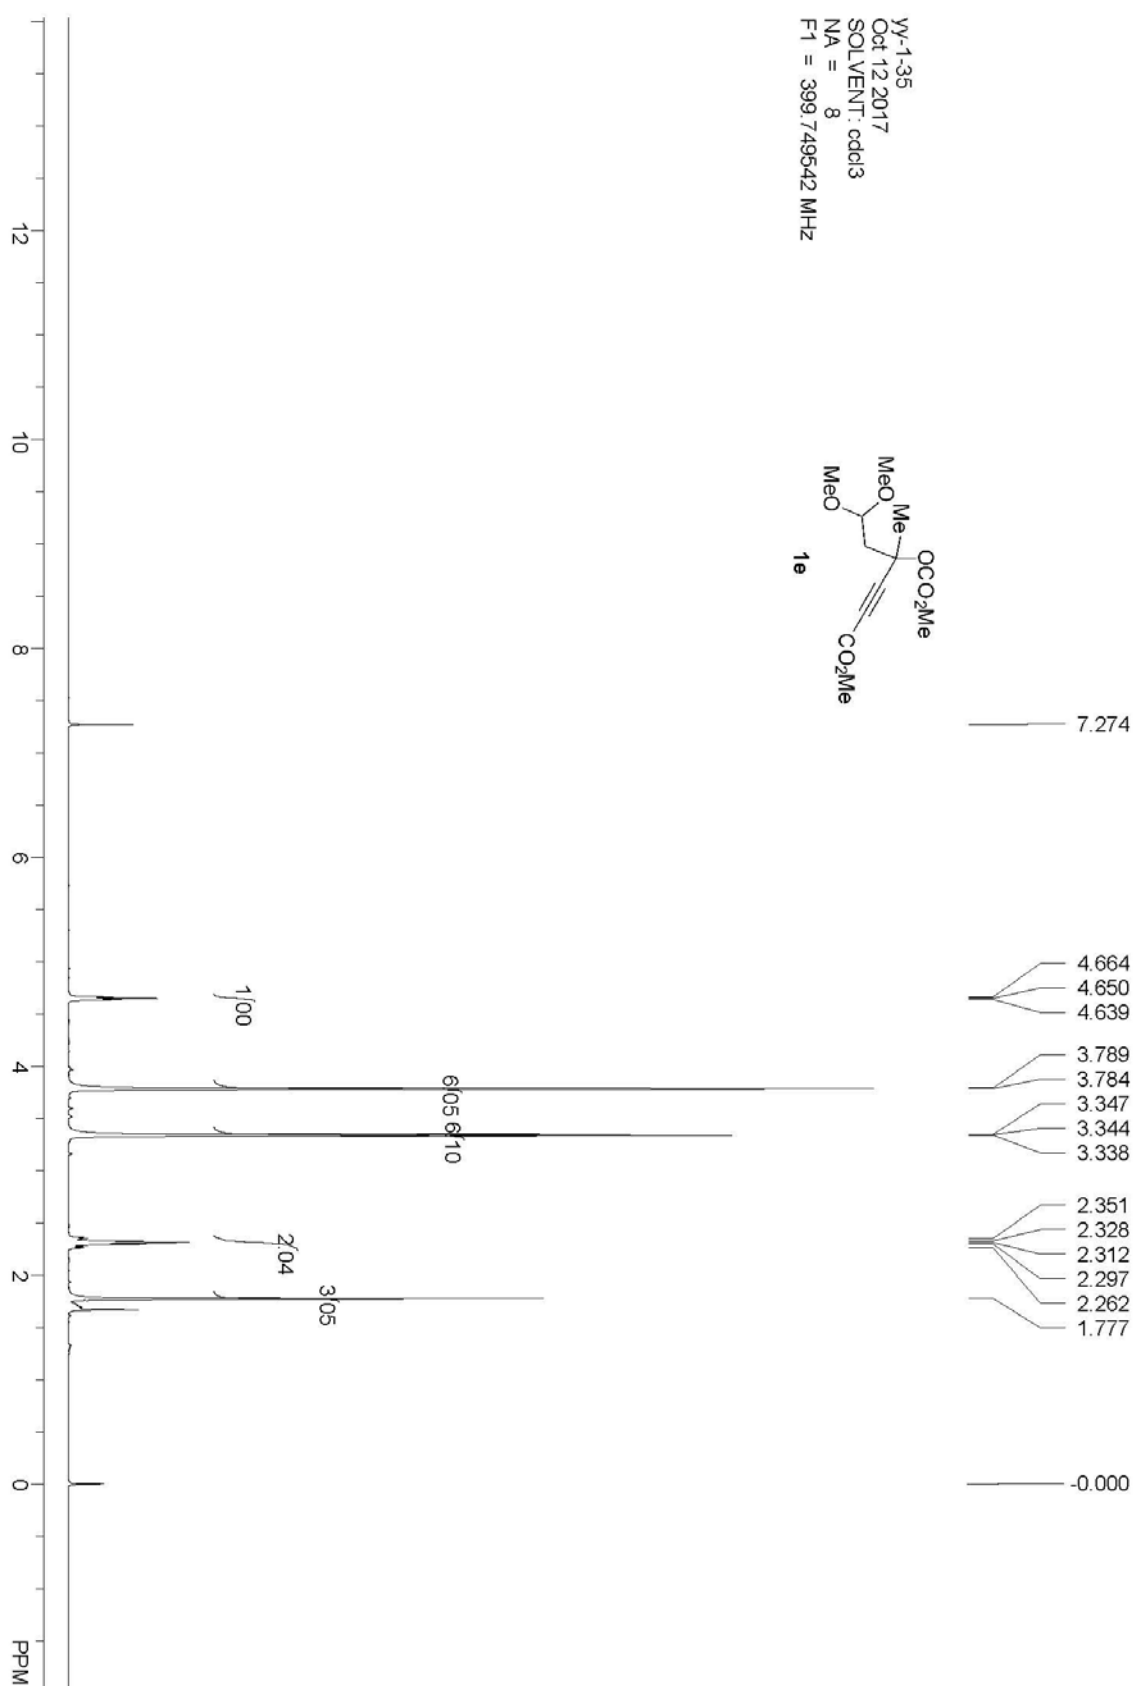

YV-01-035C  
 Nov 1 2017  
 SOLVENT: cdcl3  
 NA = 256  
 F1 = 100.527557 MHz

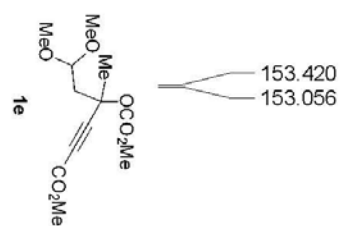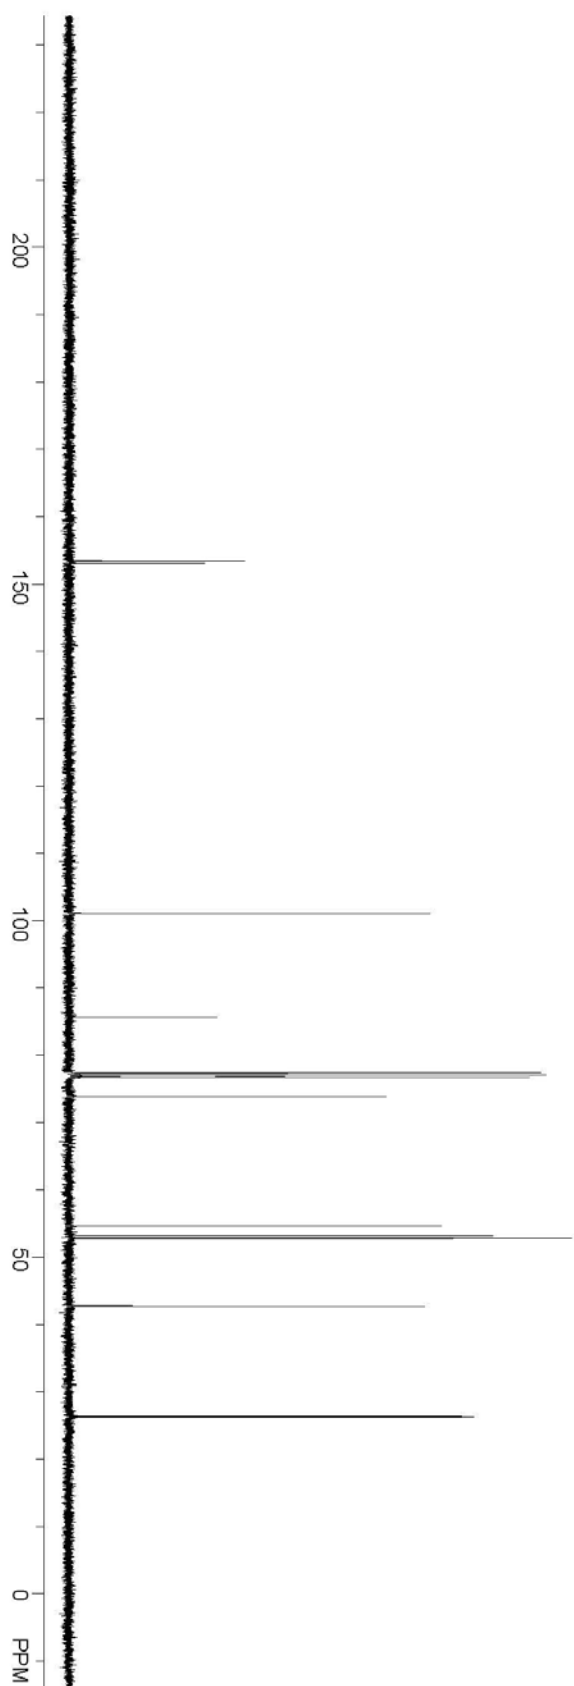

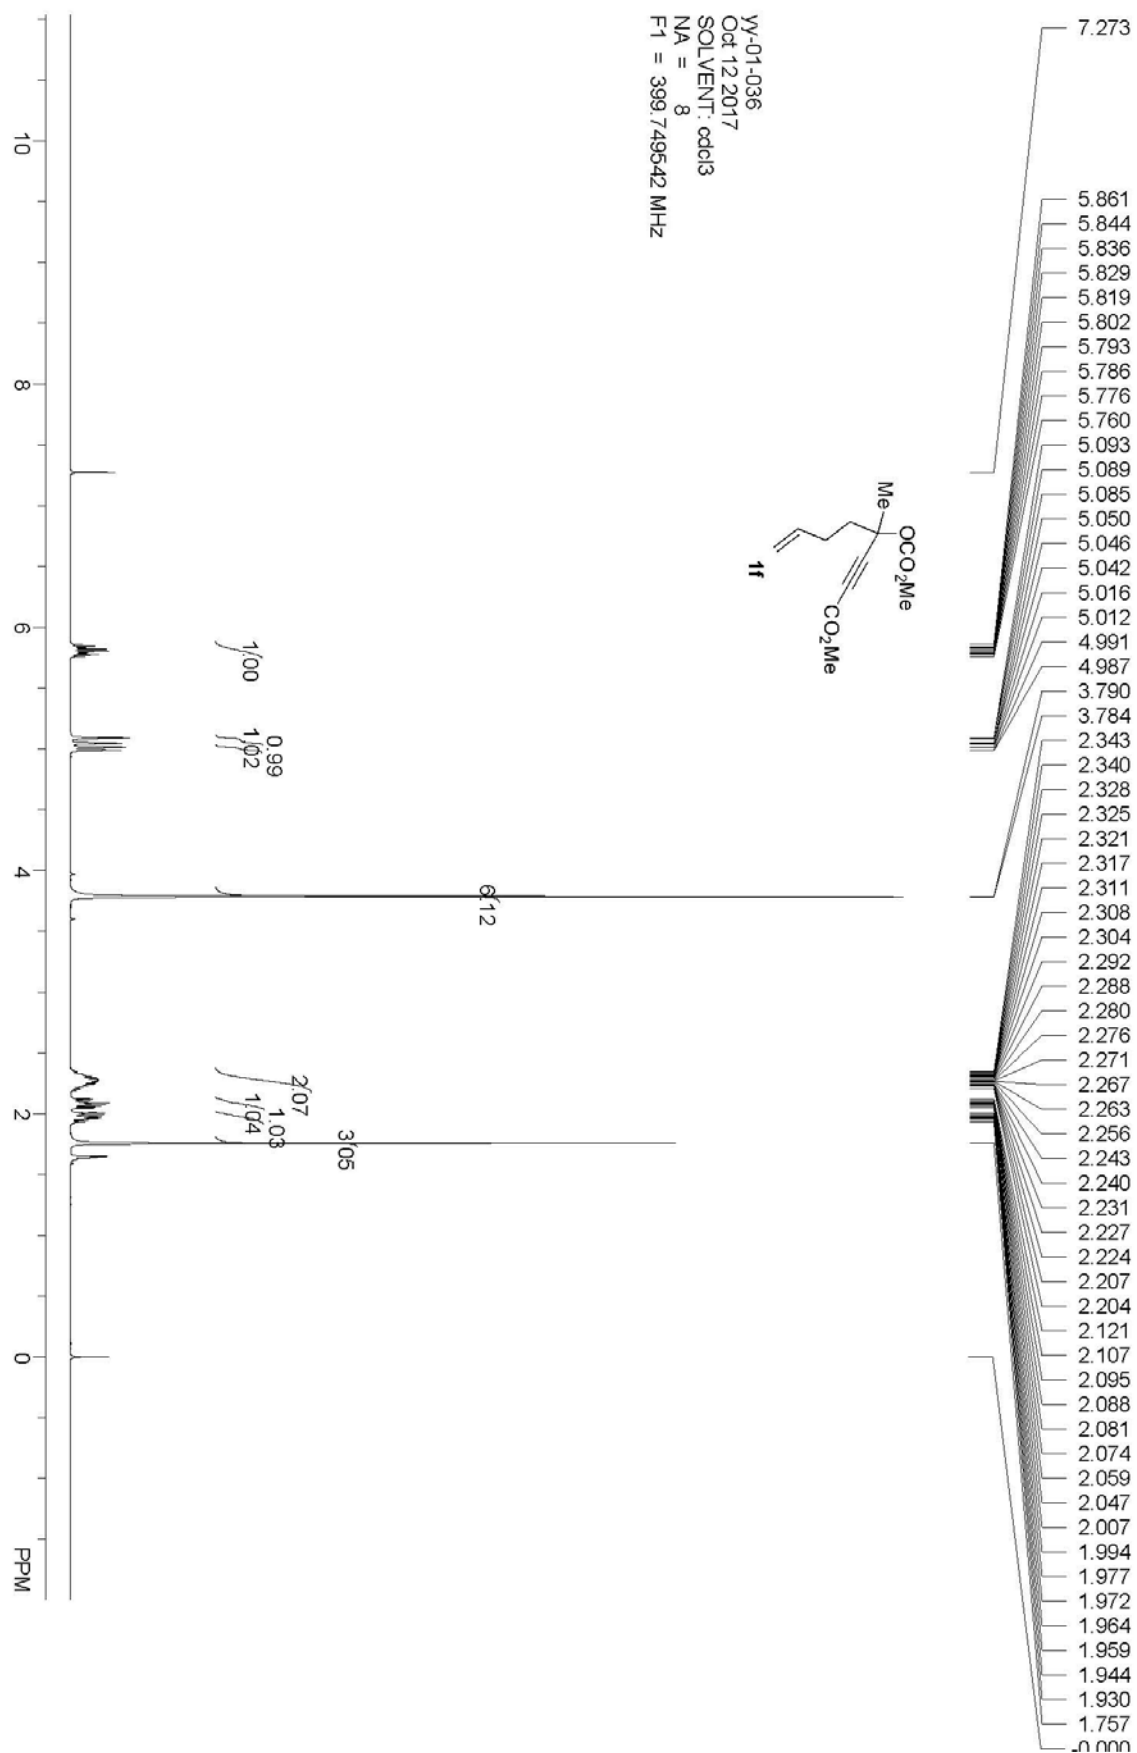

yao-01-036C  
 Nov 2 2017  
 SOLVENT: cdcl3  
 NA = 256  
 F1 = 100.527557 MHz

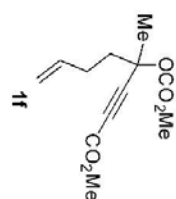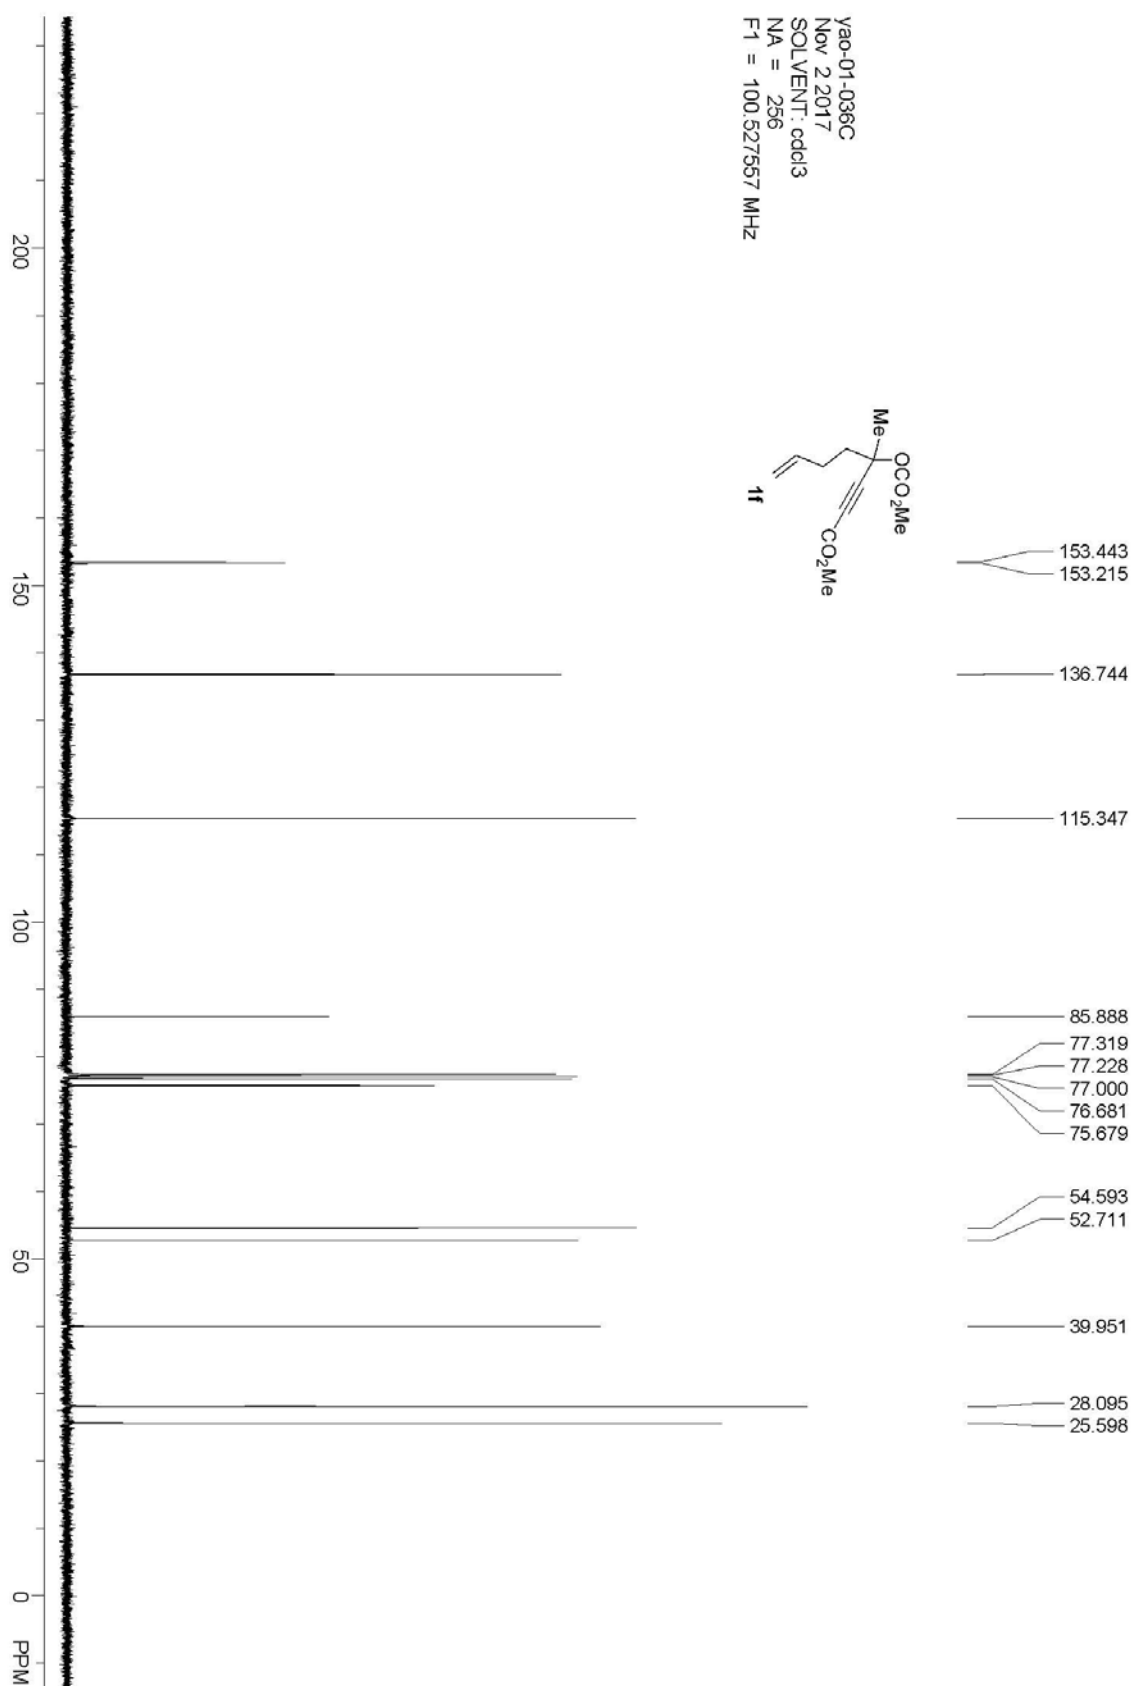

Yao-01-060  
 Oct 31 2017  
 SOLVENT: cdcl3  
 NA = 8  
 F1 = 399.749542 MHz

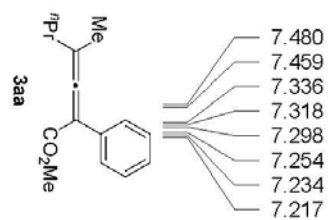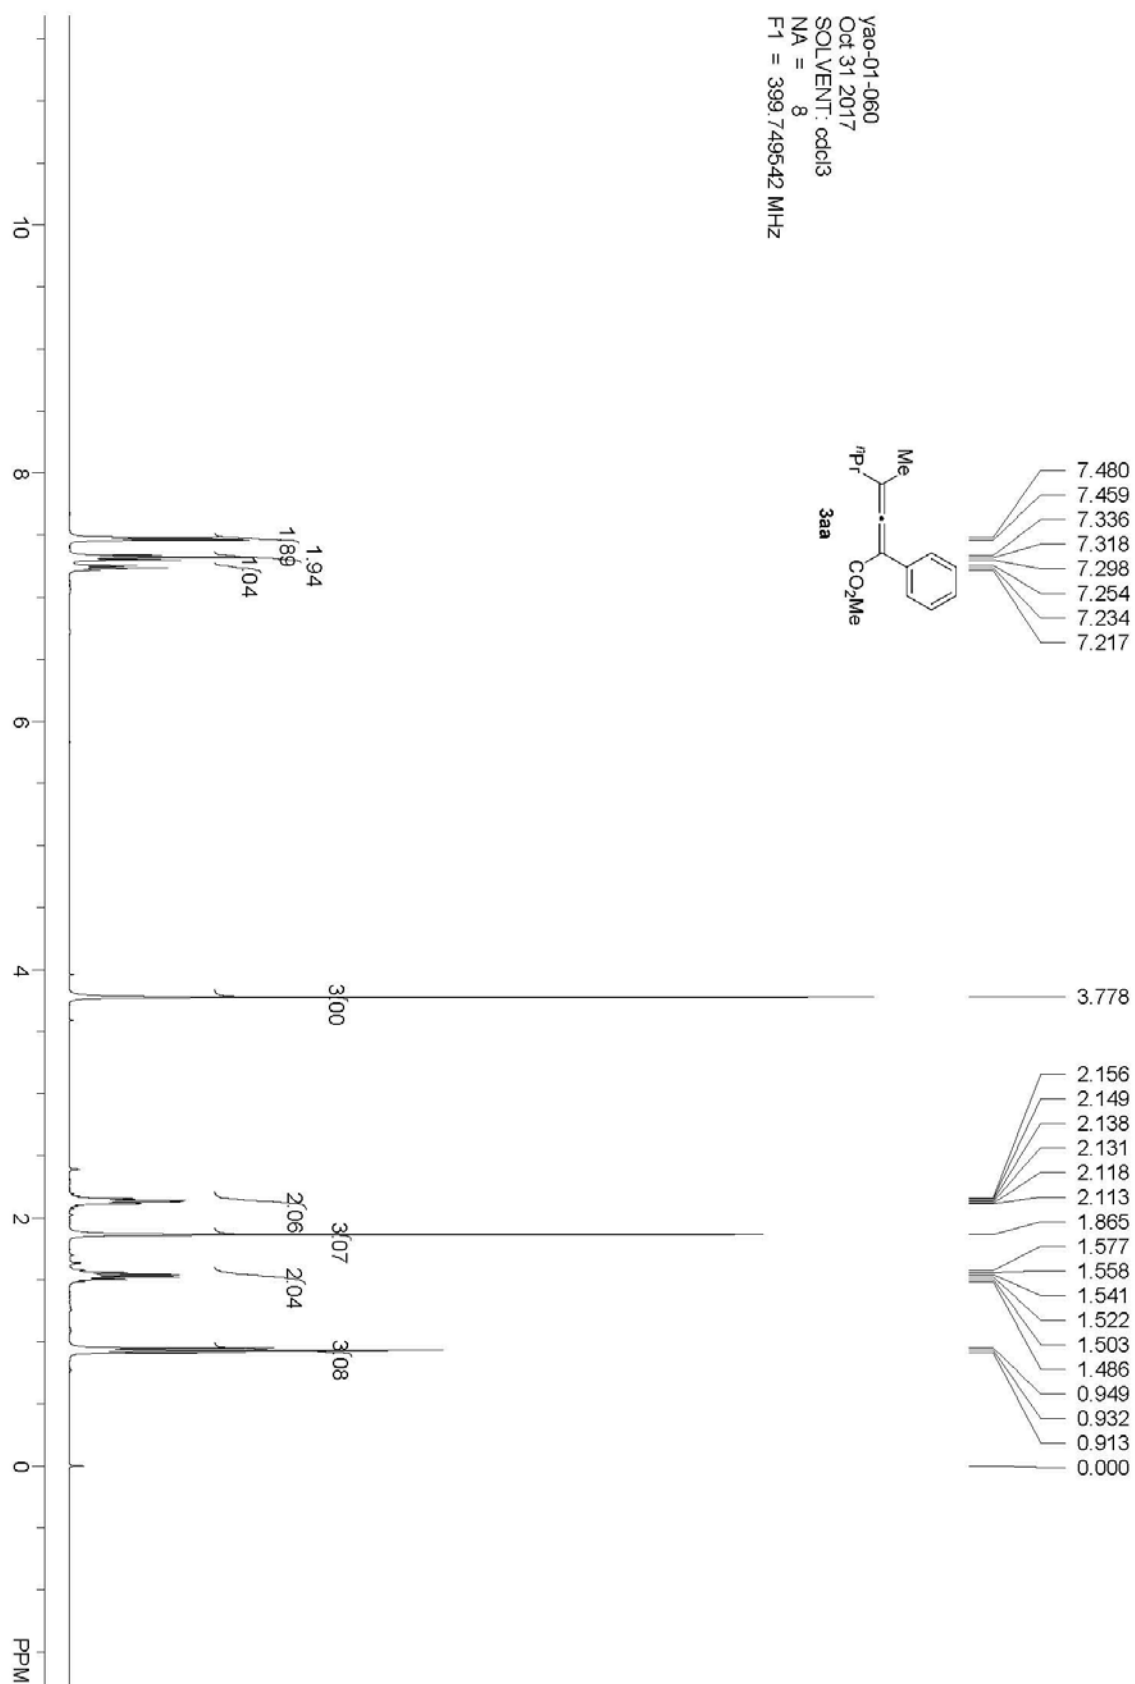

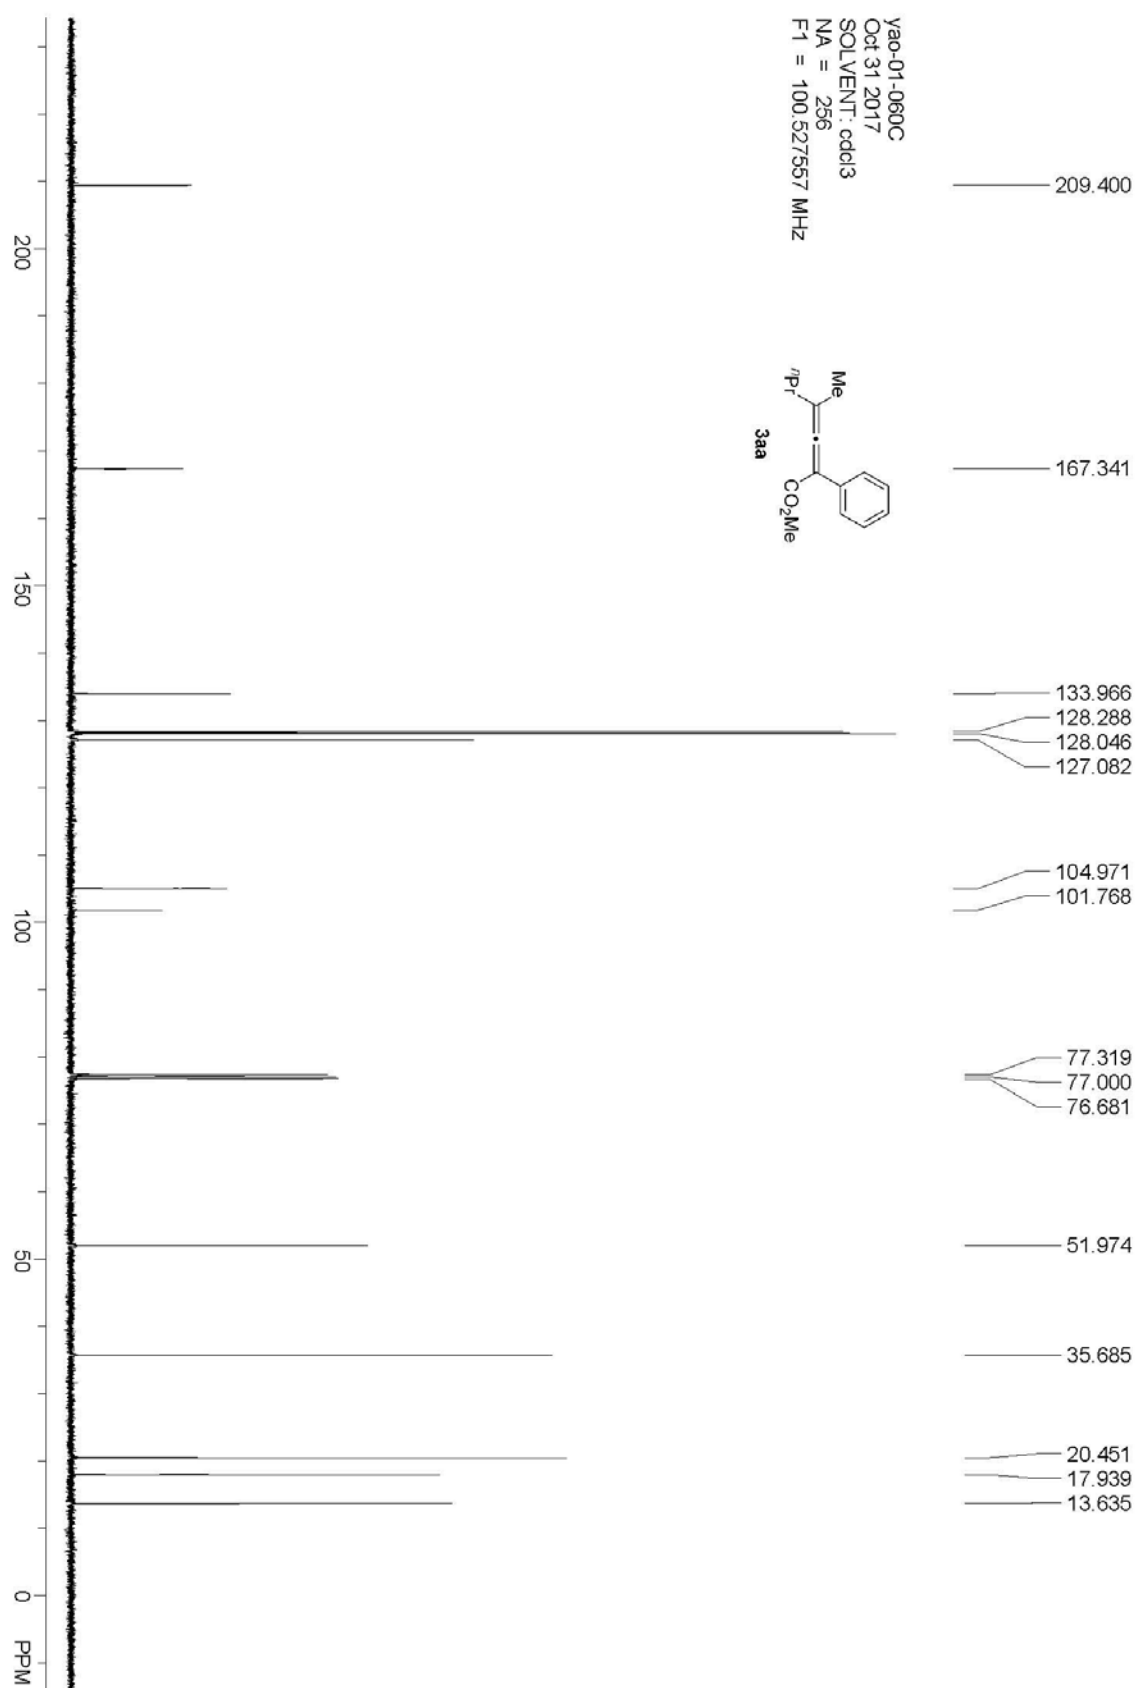

yy-01-045  
 Oct 18 2017  
 SOLVENT: cdcl3  
 NA = 4  
 F1 = 399.749542 MHz

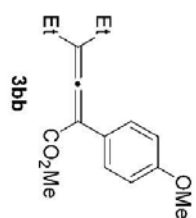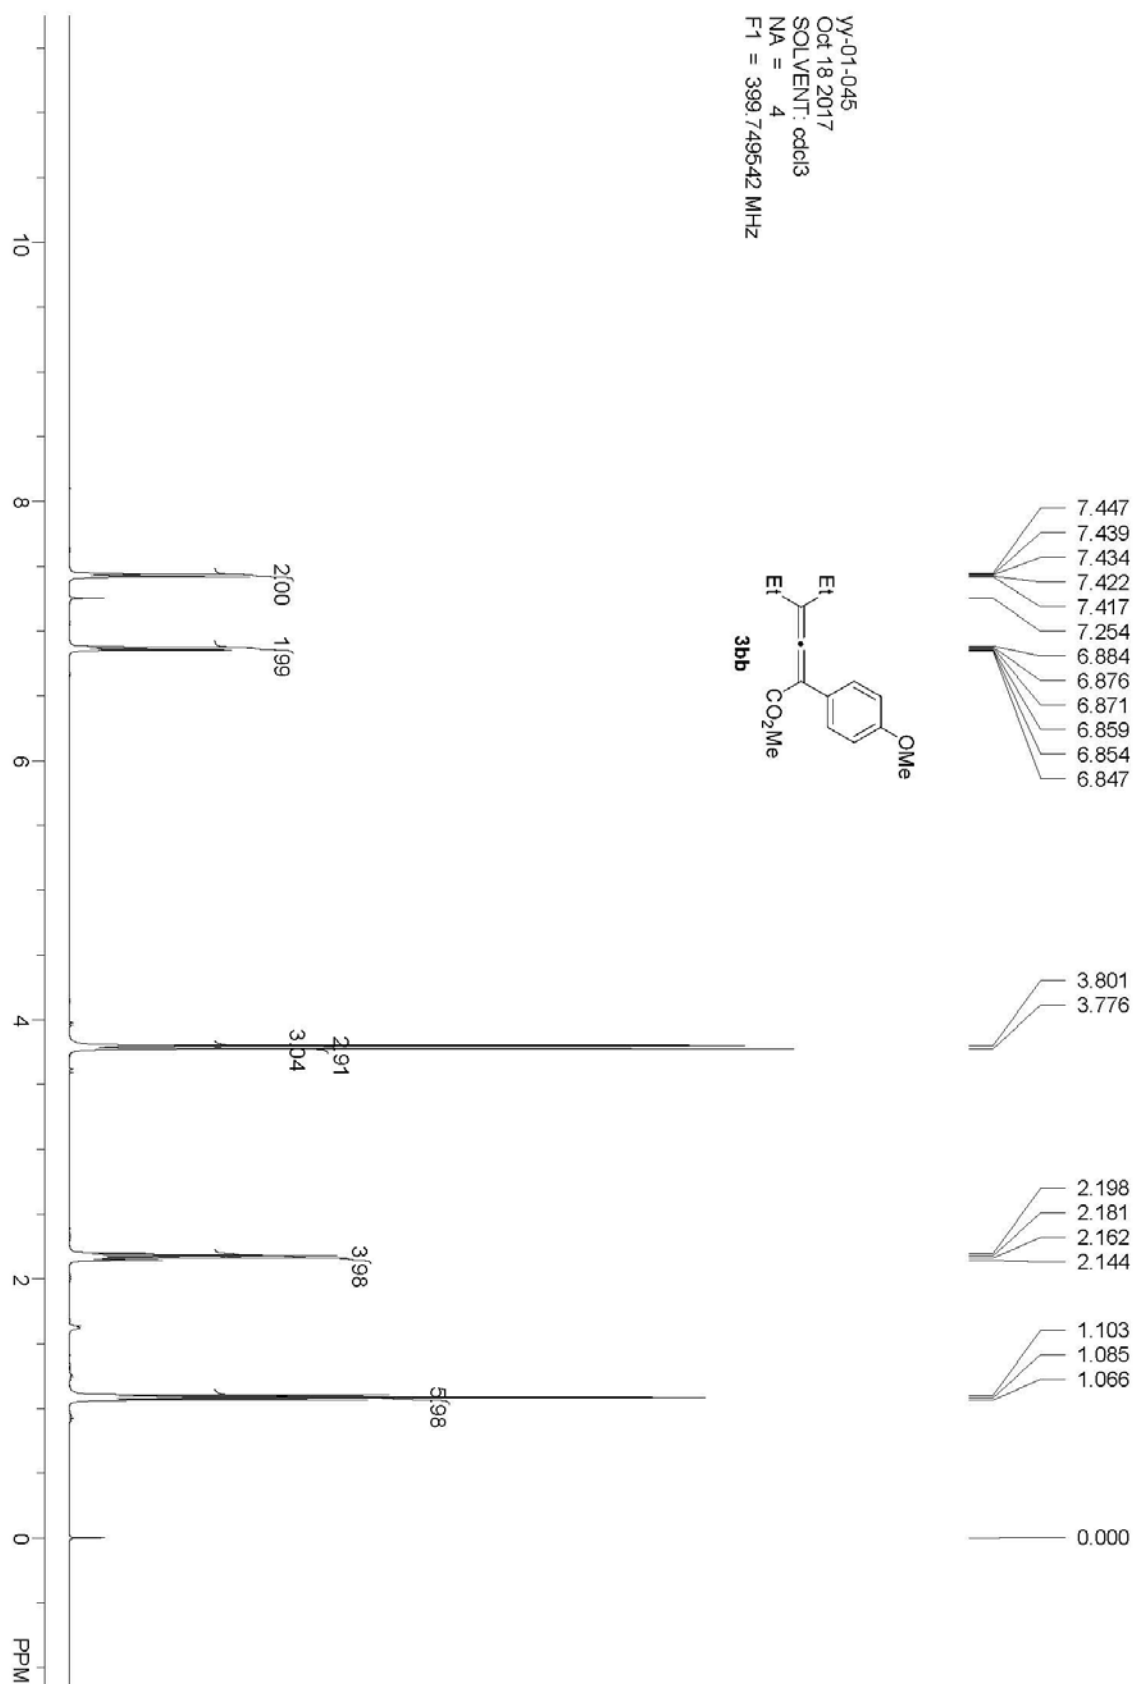

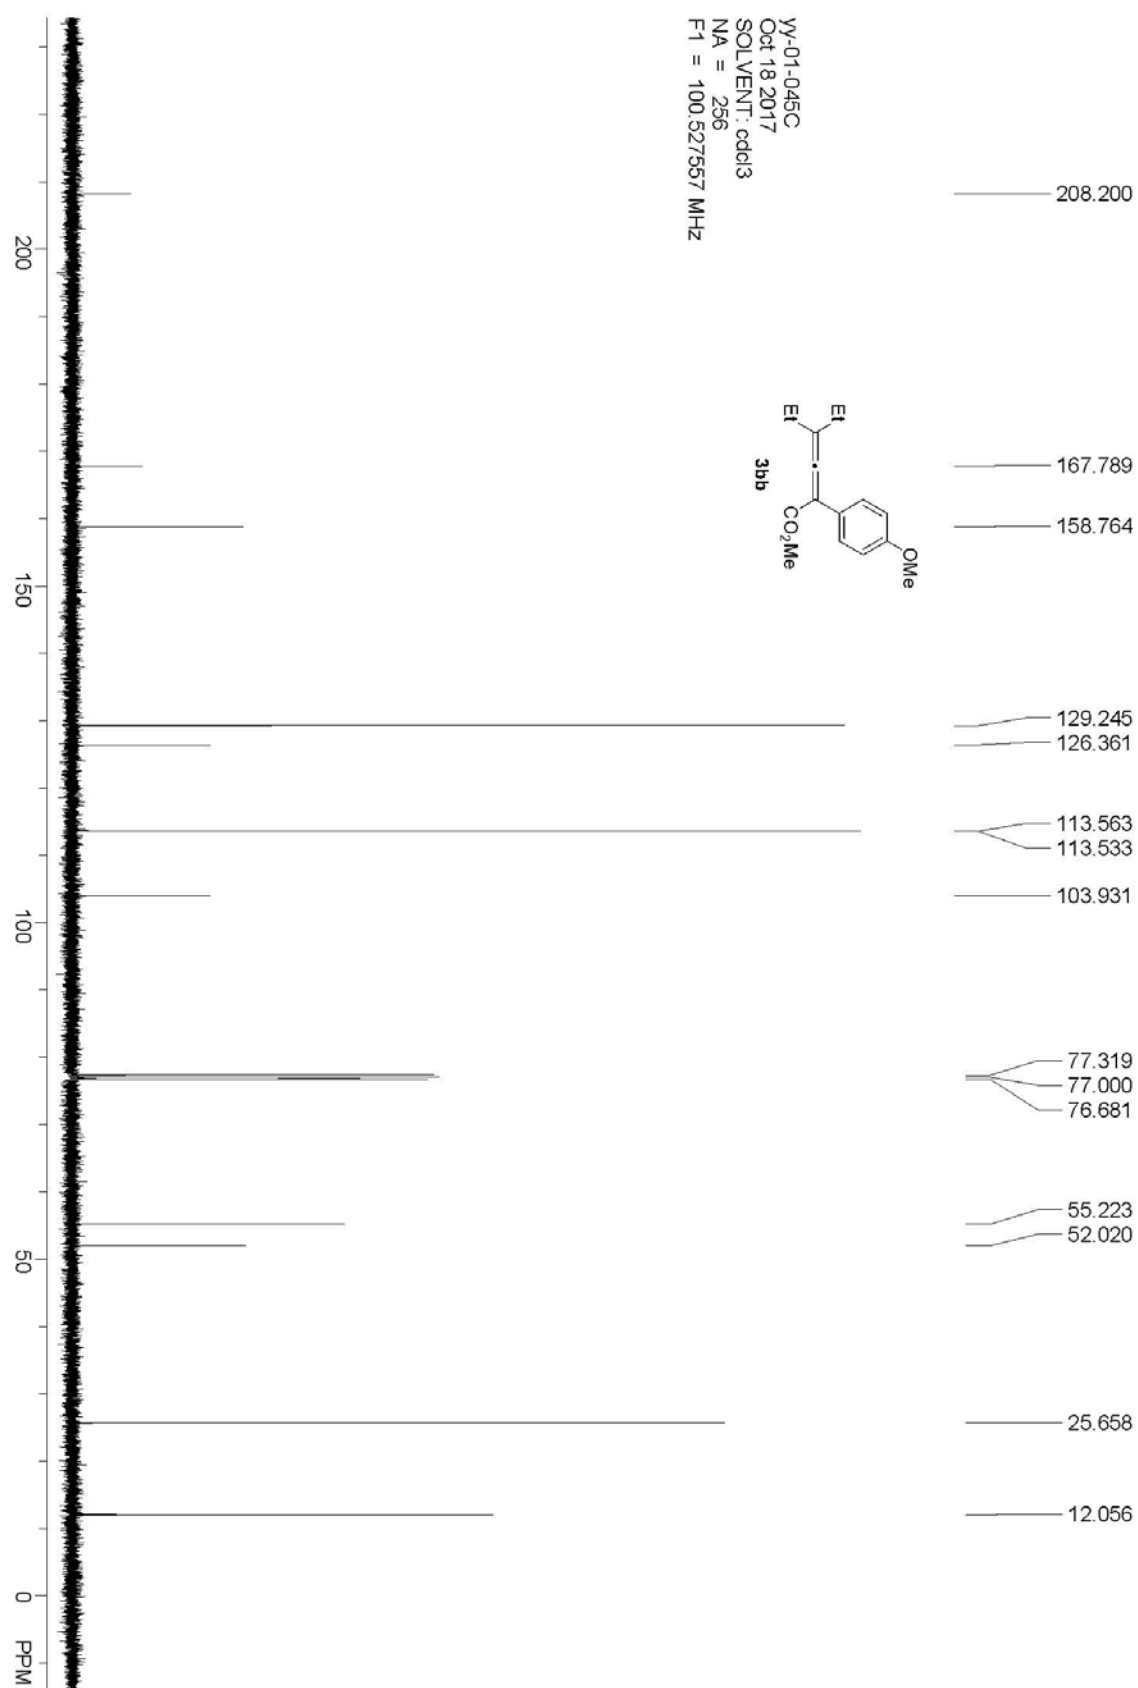

Yao-01-050  
 Oct 24 2017  
 SOLVENT: cdcl3  
 NA = 4  
 F1 = 399.749542 MHz

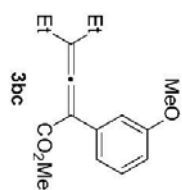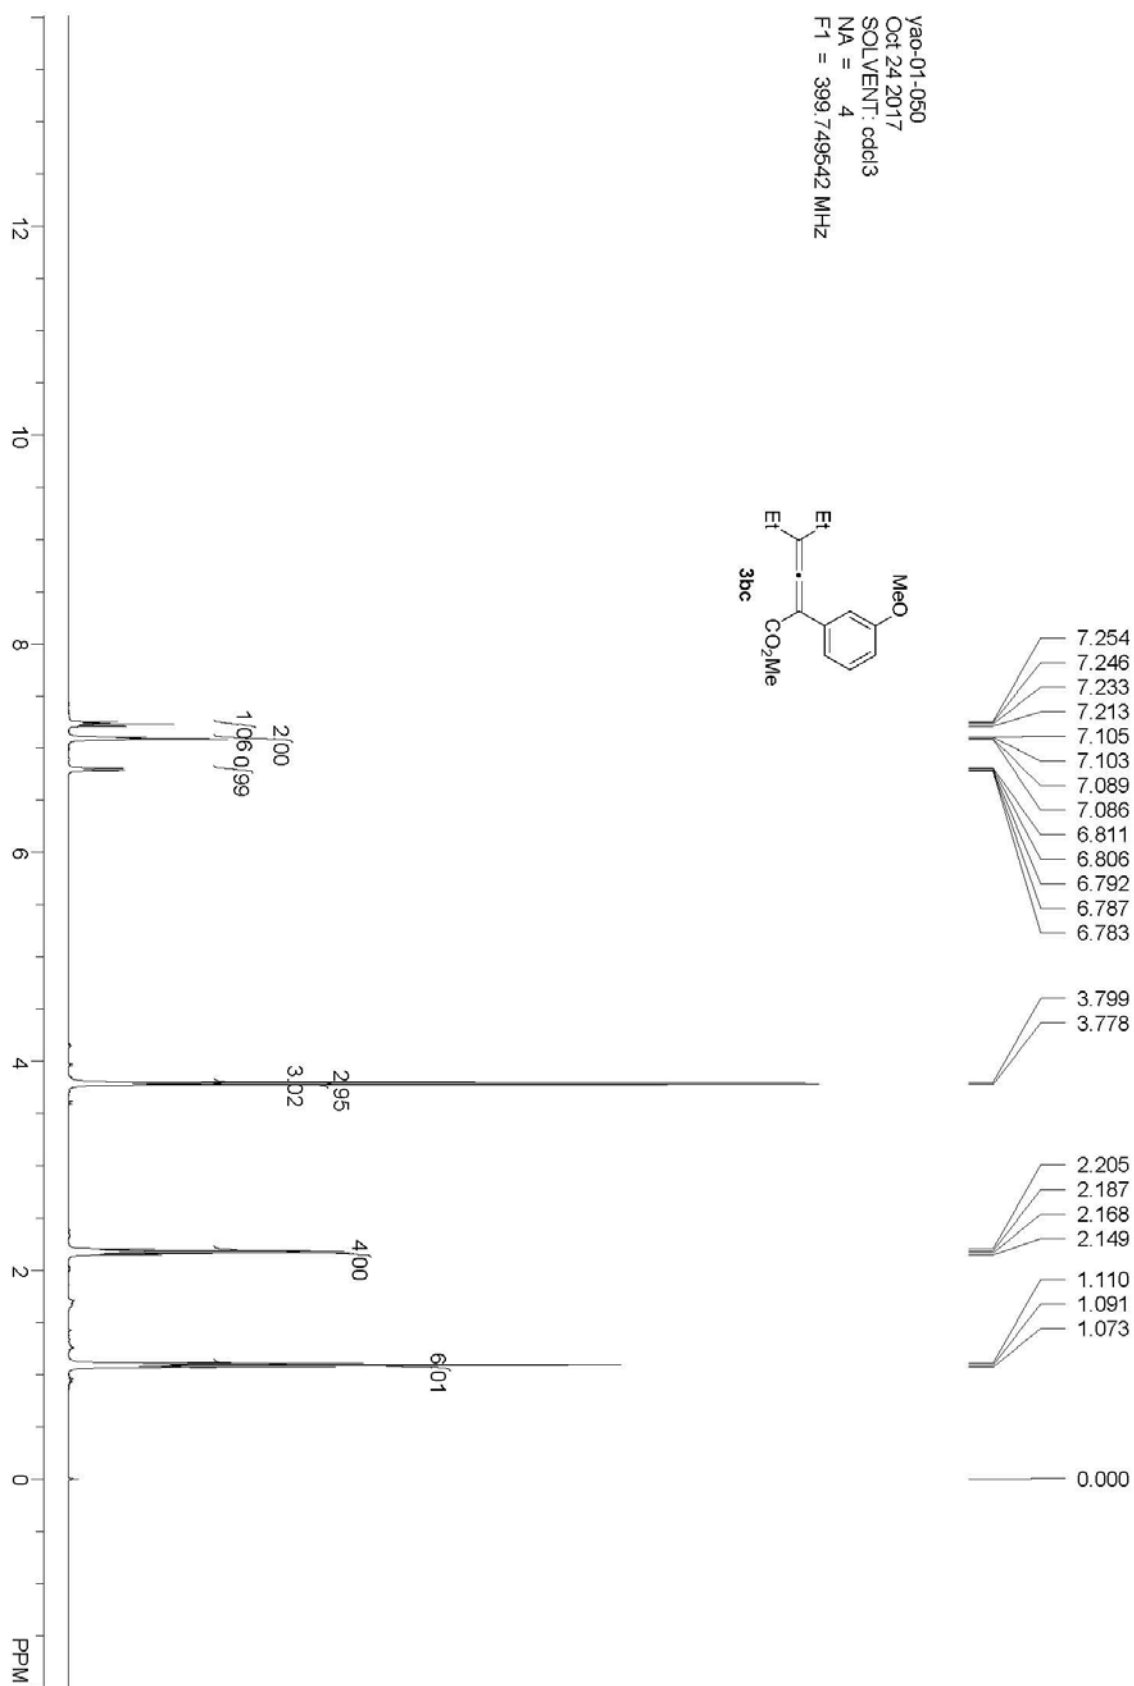

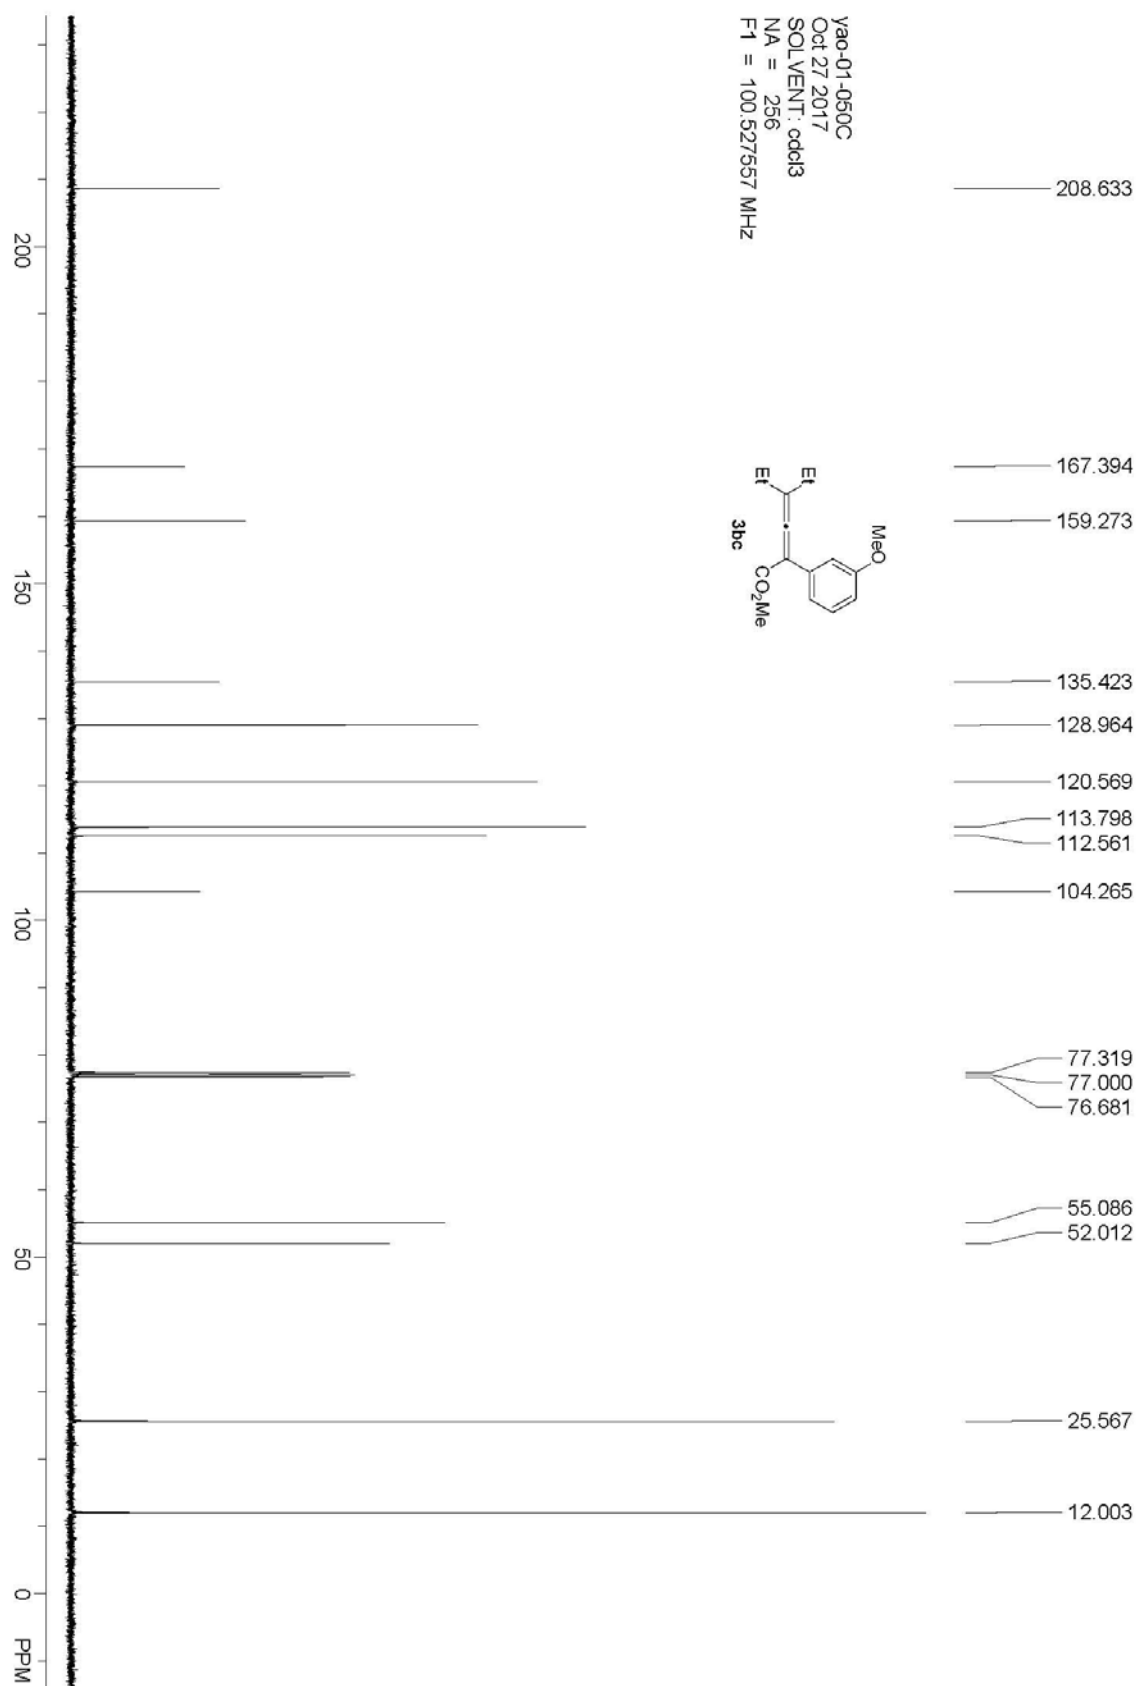

Yao-01-122  
Dec 15 2017  
SOLVENT: cdcl3  
NA = 8  
F1 = 399.749542 MHz

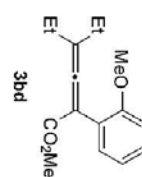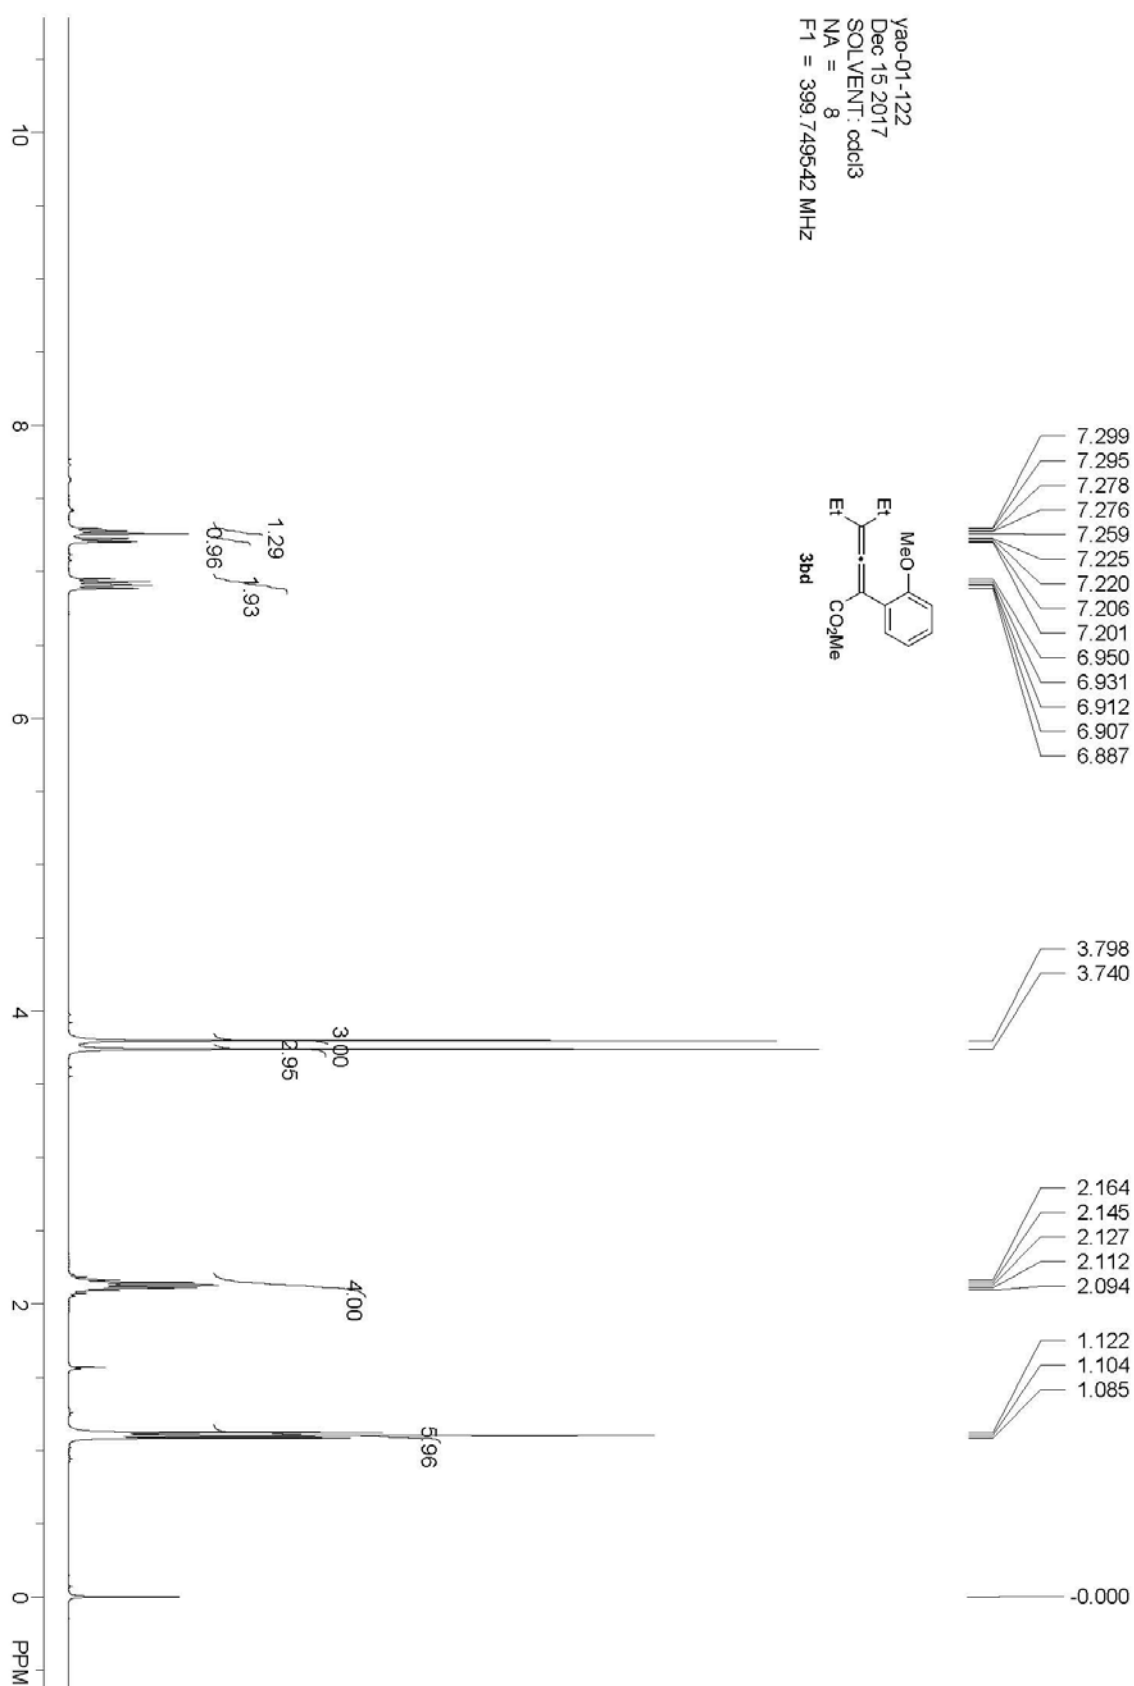

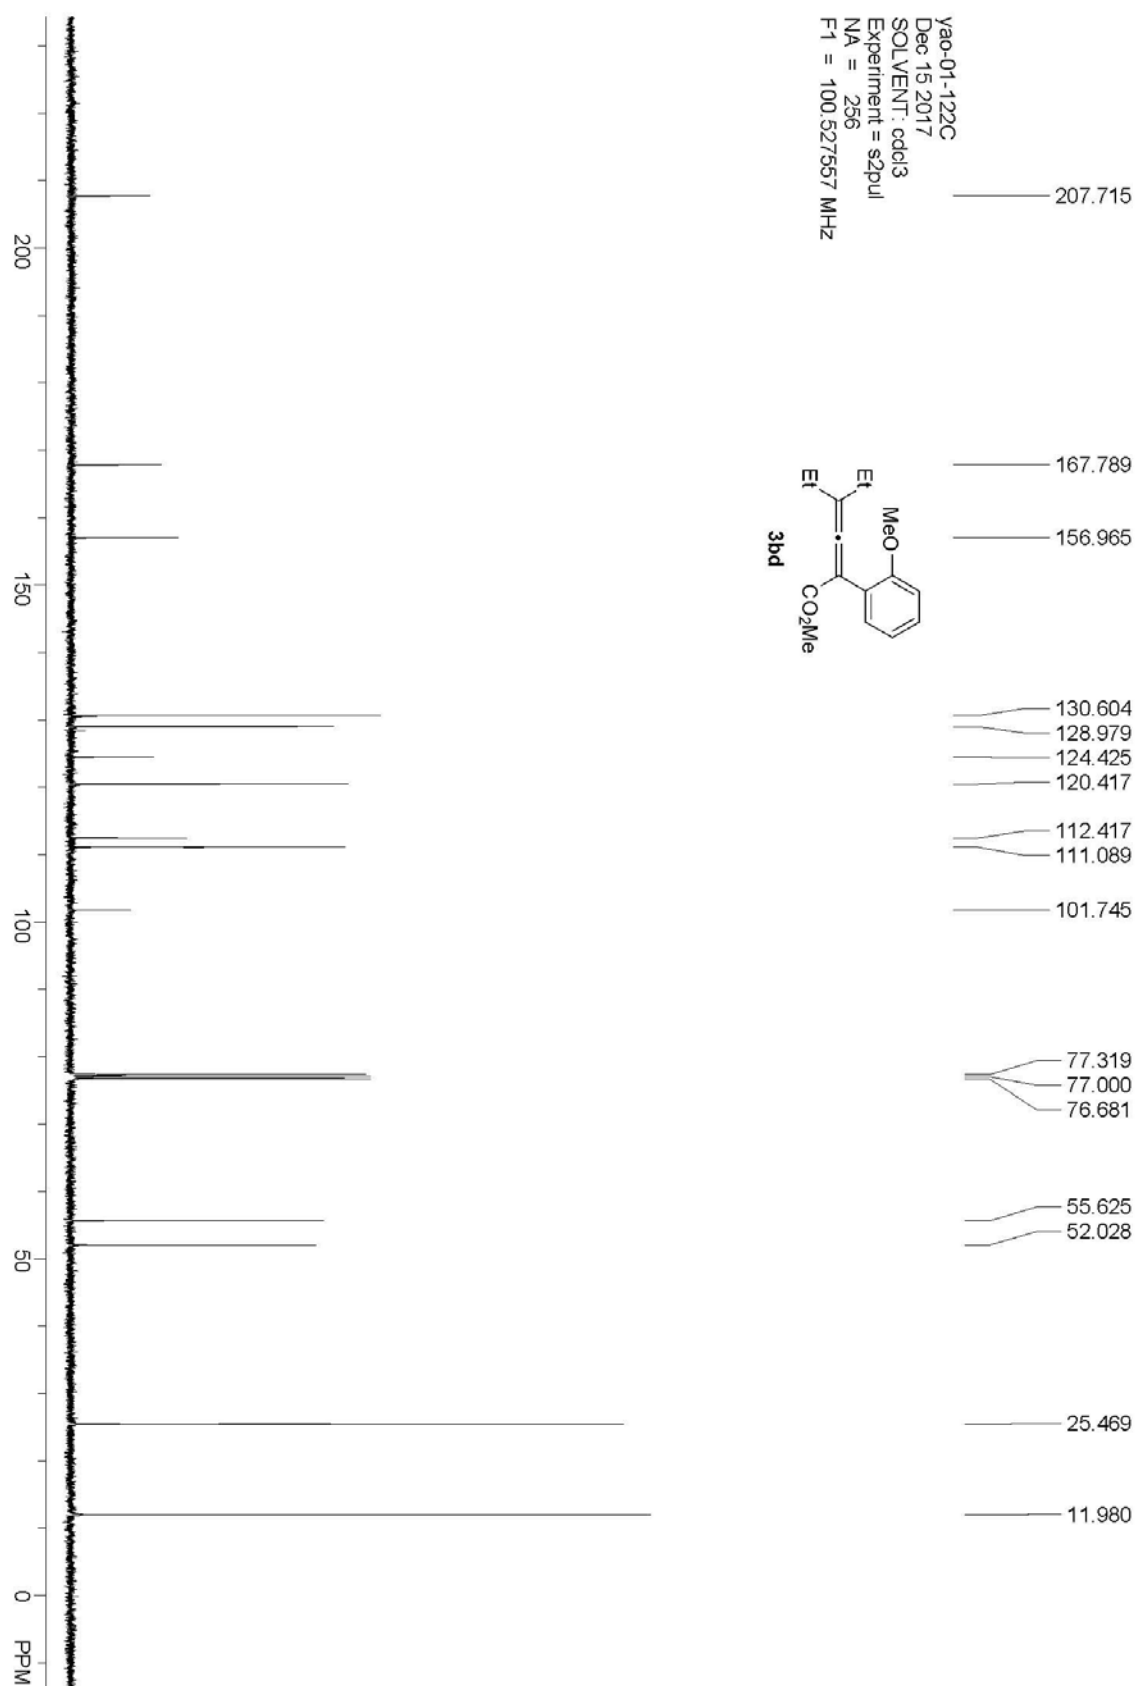

Yao-01-1220cd  
 Dec 16 2017  
 SOLVENT: cdcl3  
 NA = 4  
 F1 = 399.749542 MHz

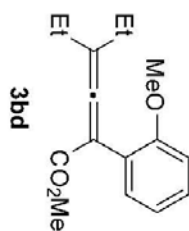

Purity (100%) determined by using CH<sub>2</sub>Br<sub>2</sub> (14.0  $\mu$ L, 0.2 mmol)  
 as the internal standard in 54.0 mg of sample

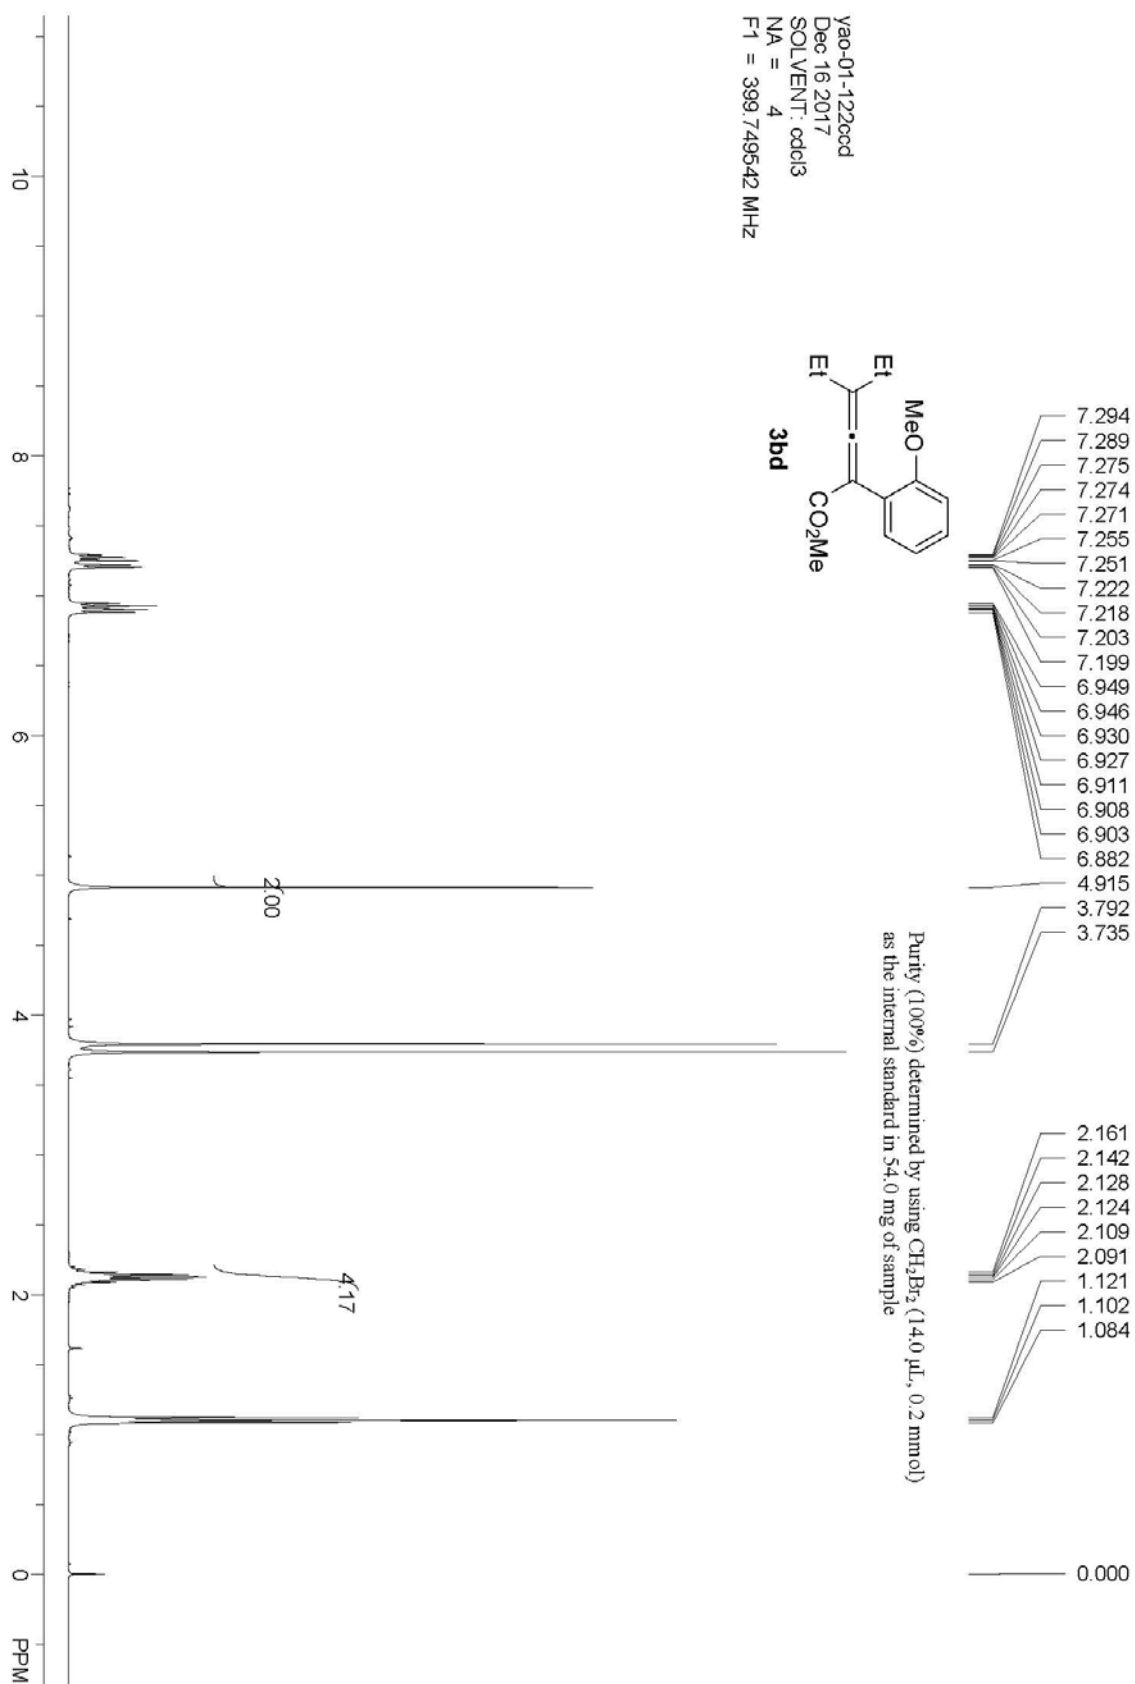

yao-01-109  
 Nov 29 2017  
 SOLVENT: cd3od  
 NA = 8  
 F1 = 399.751129 MHz

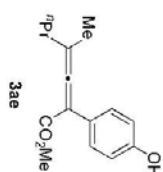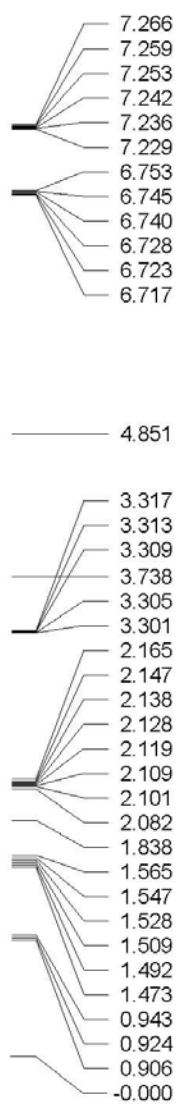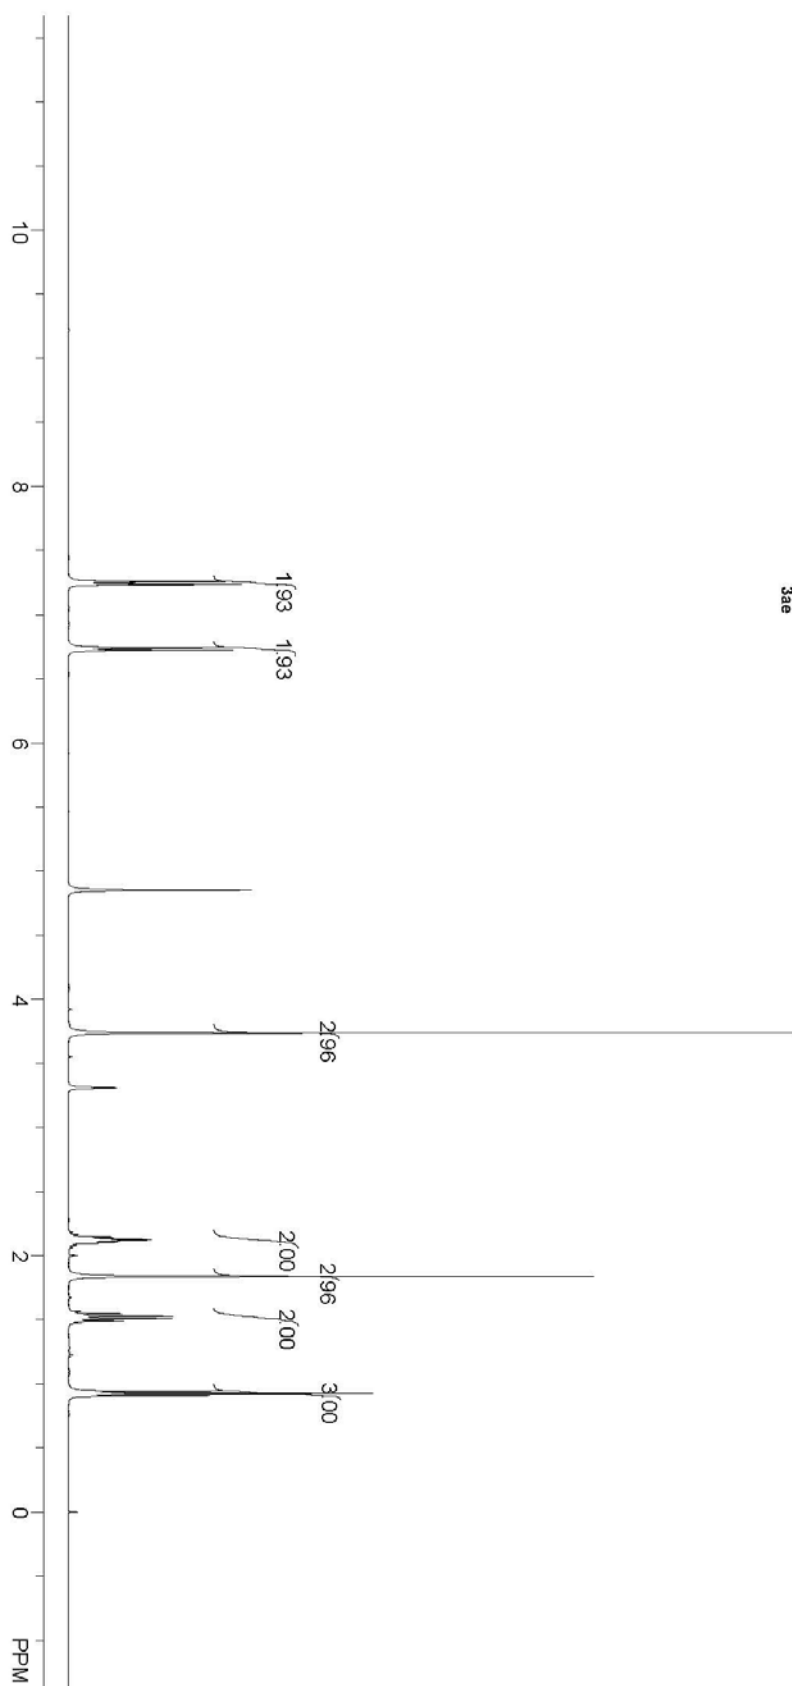

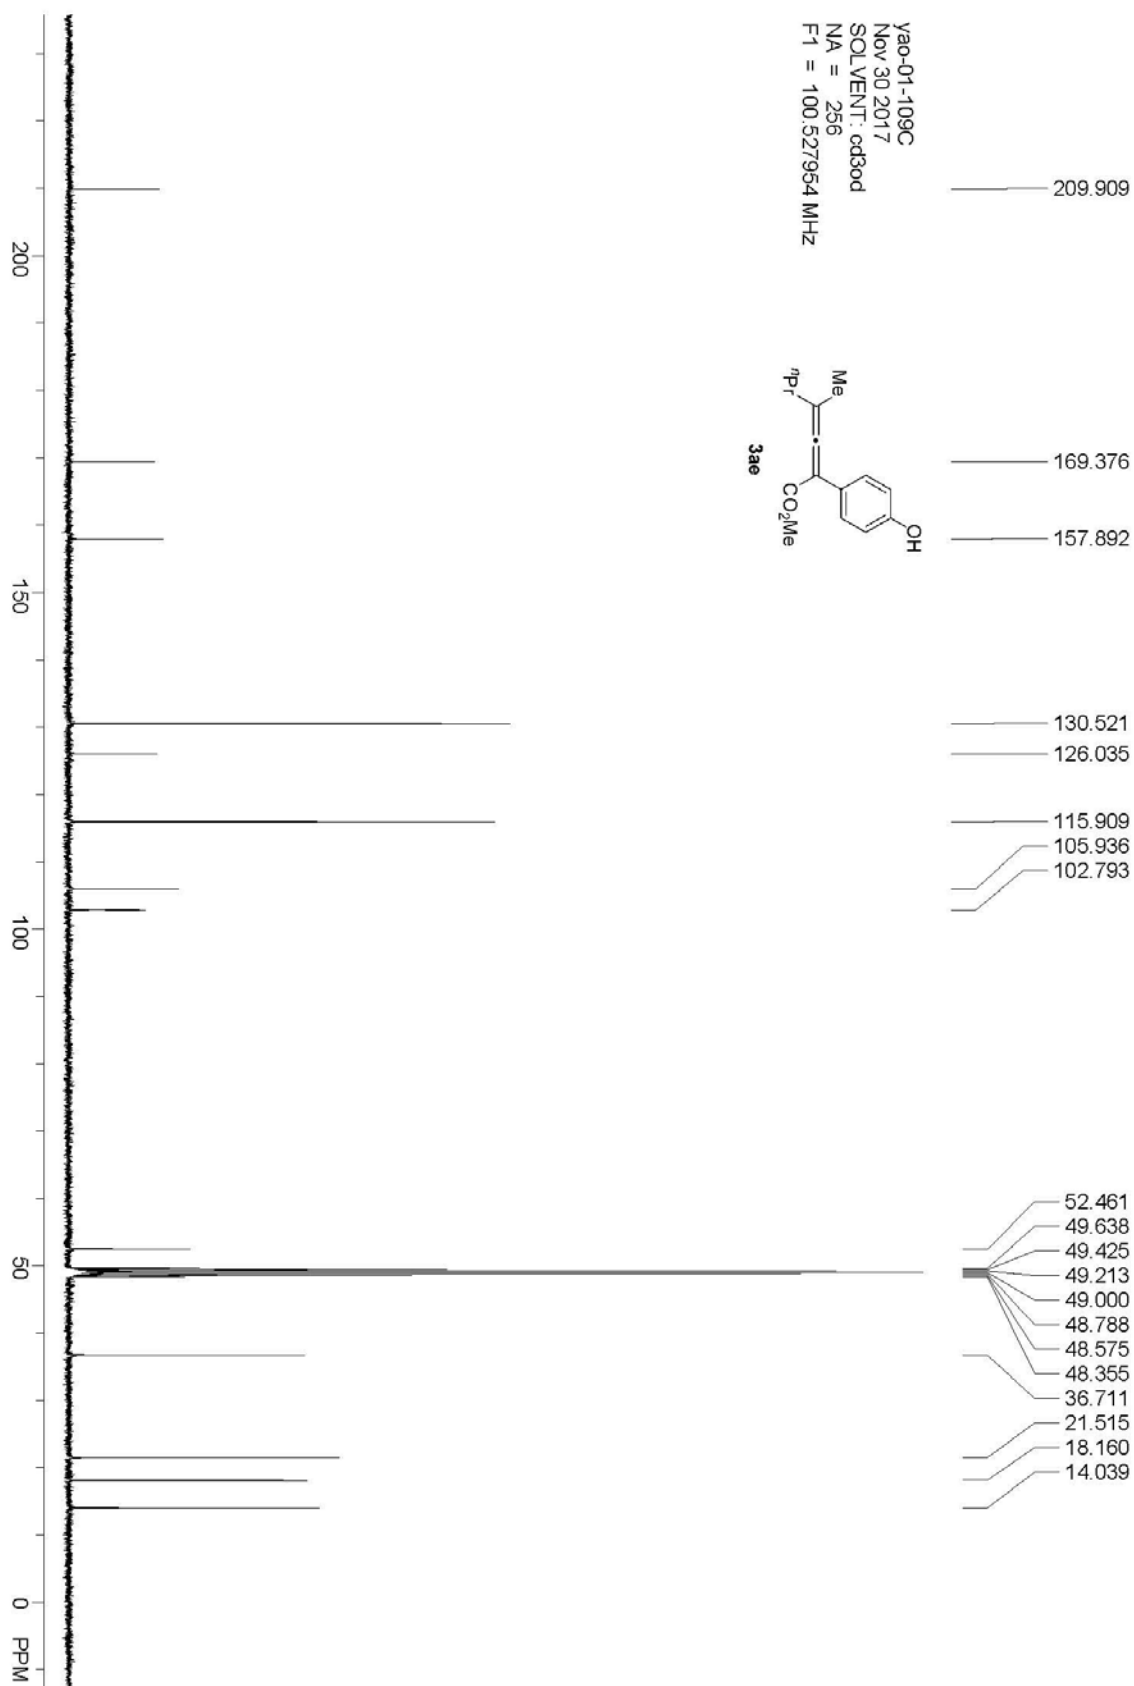

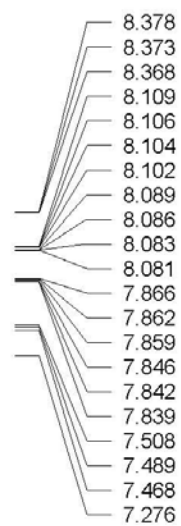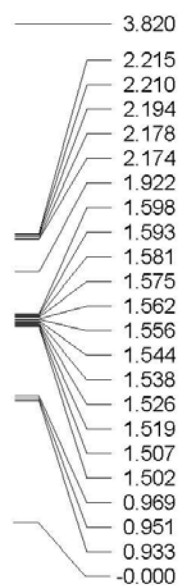

yao-01-059  
Oct 30 2017  
SOLVENT: cdcl3  
NA = 8  
F1 = 399.749542 MHz

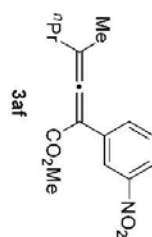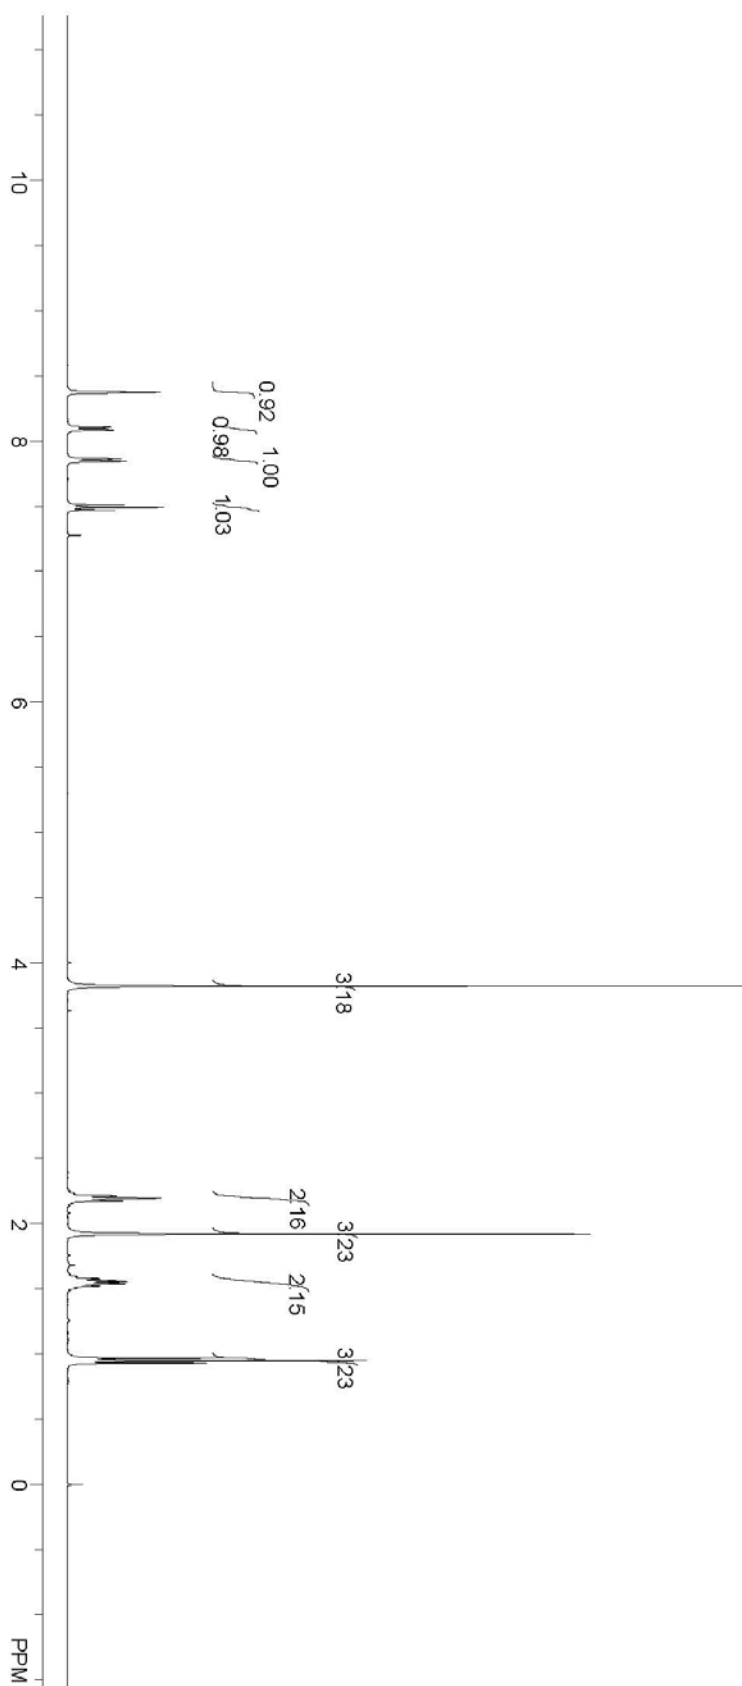

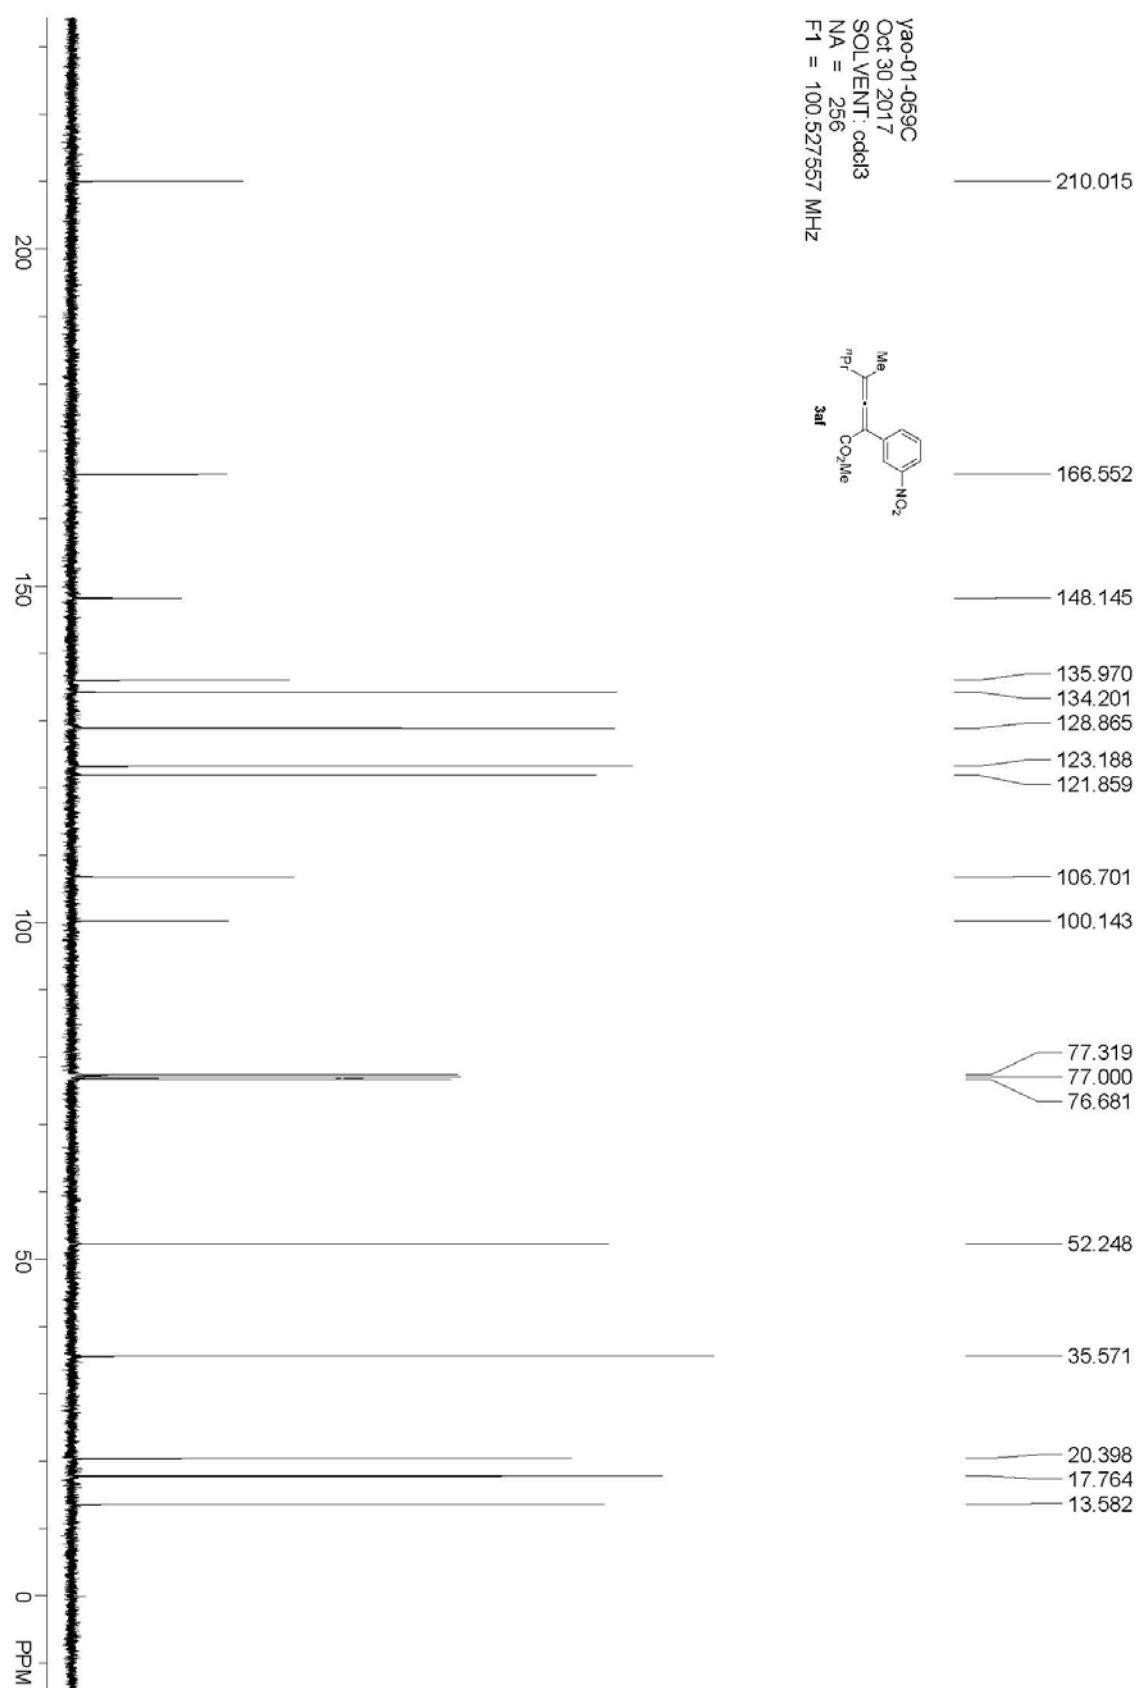

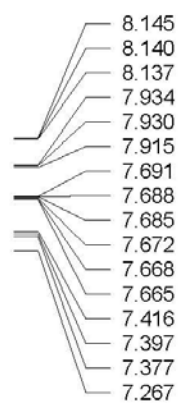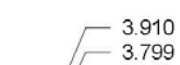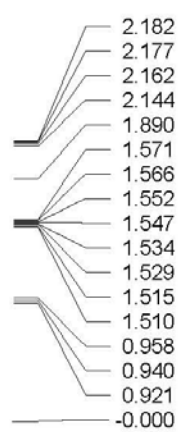

yao-01-110-2  
Dec 2 2017  
SOLVENT: cdcl3  
NA = 1  
F1 = 399.749542 MHz

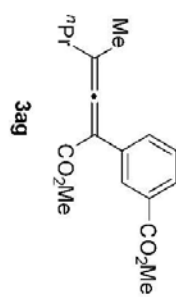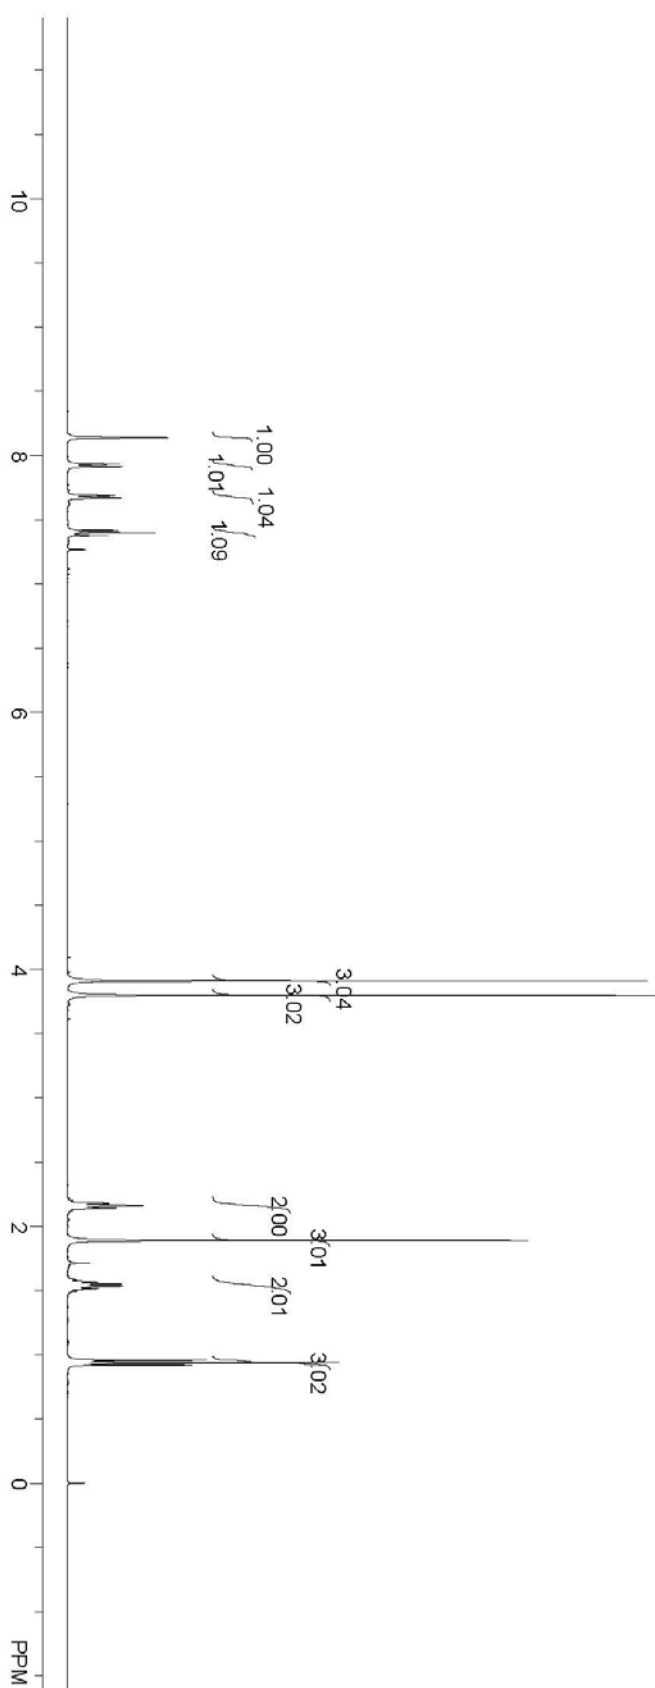

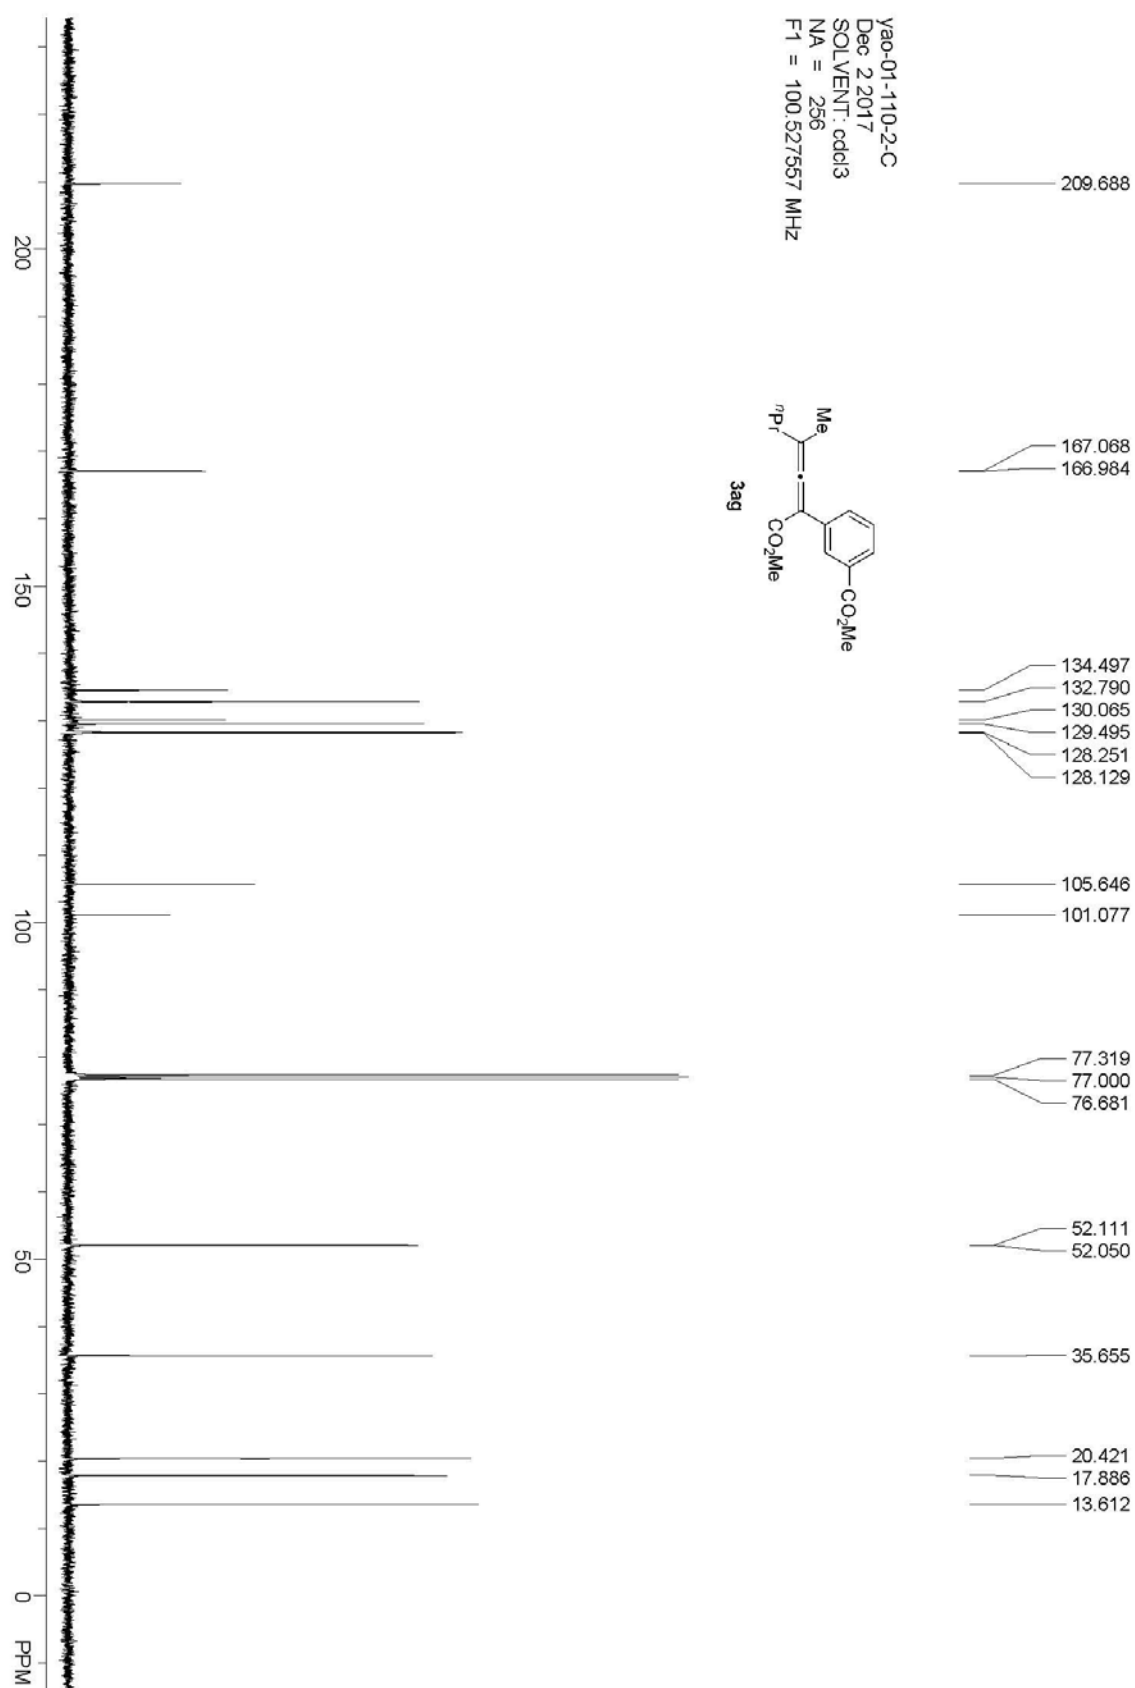

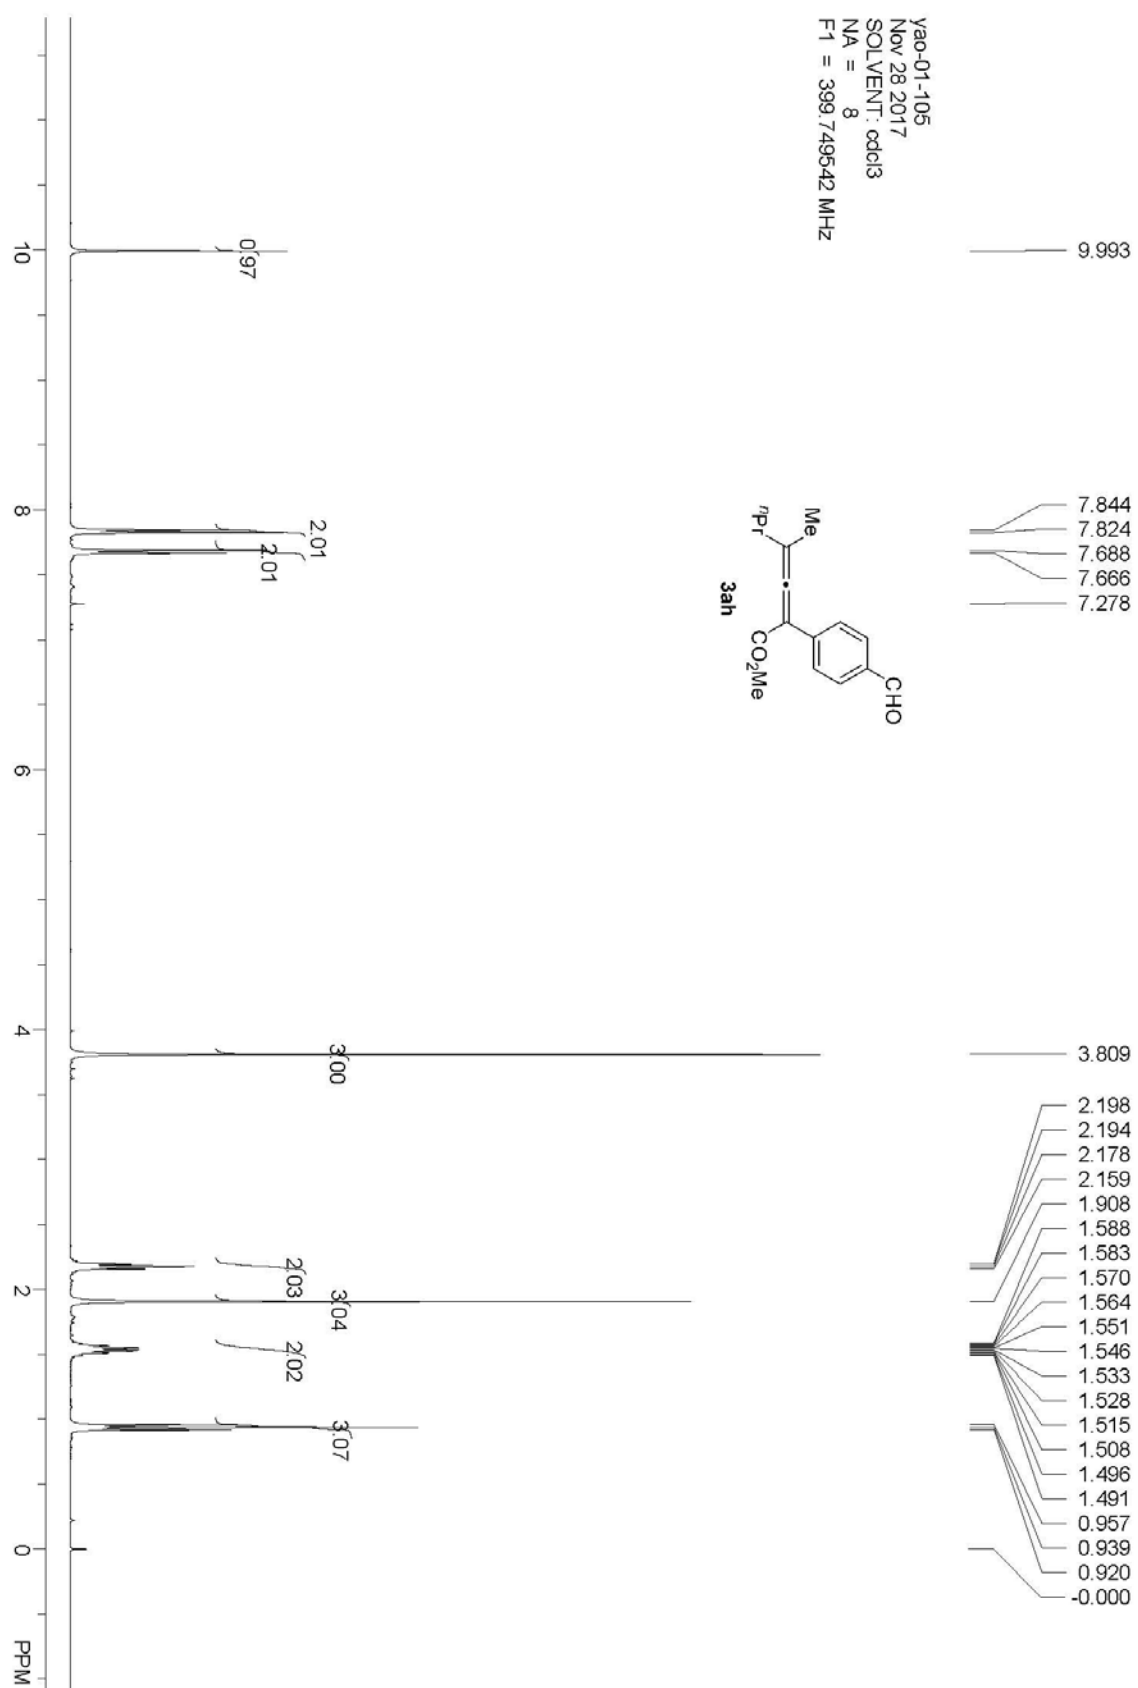

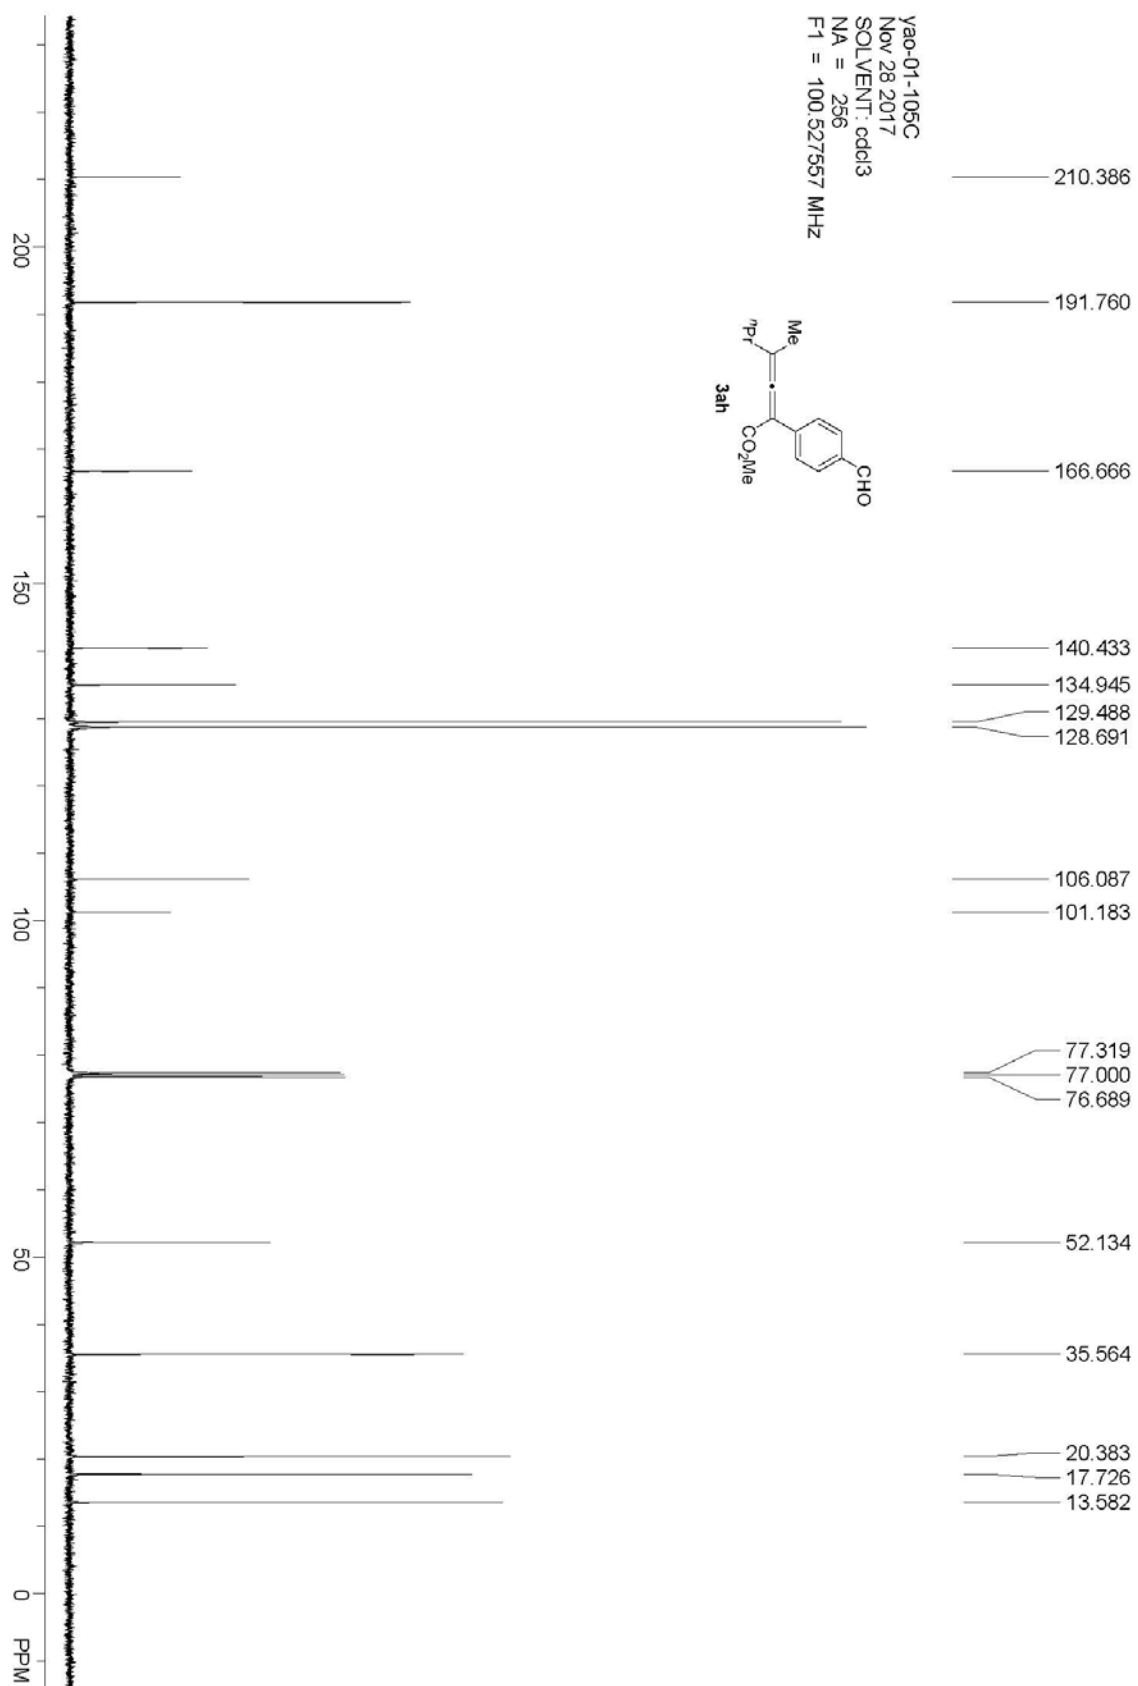

Yao-01-104  
 Nov 25 2017  
 SOLVENT: cdcl3  
 NA = 8  
 F1 = 399.749542 MHz

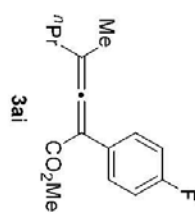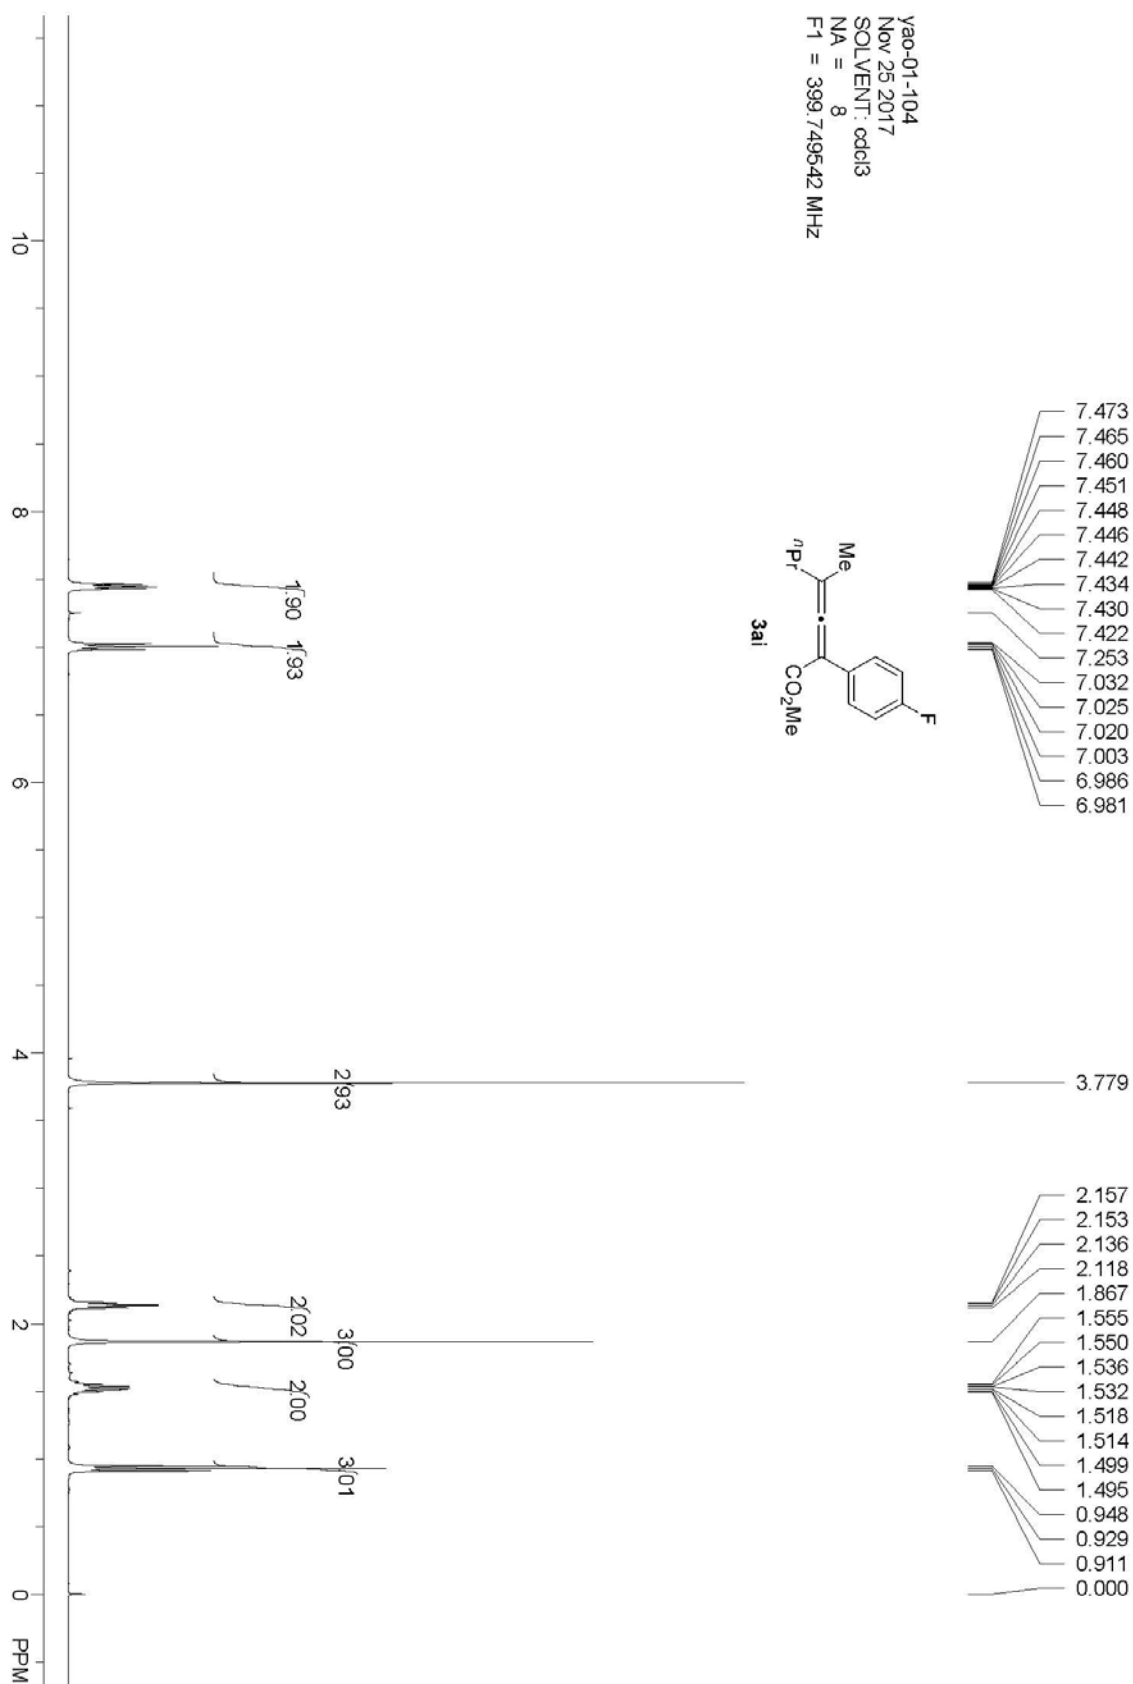

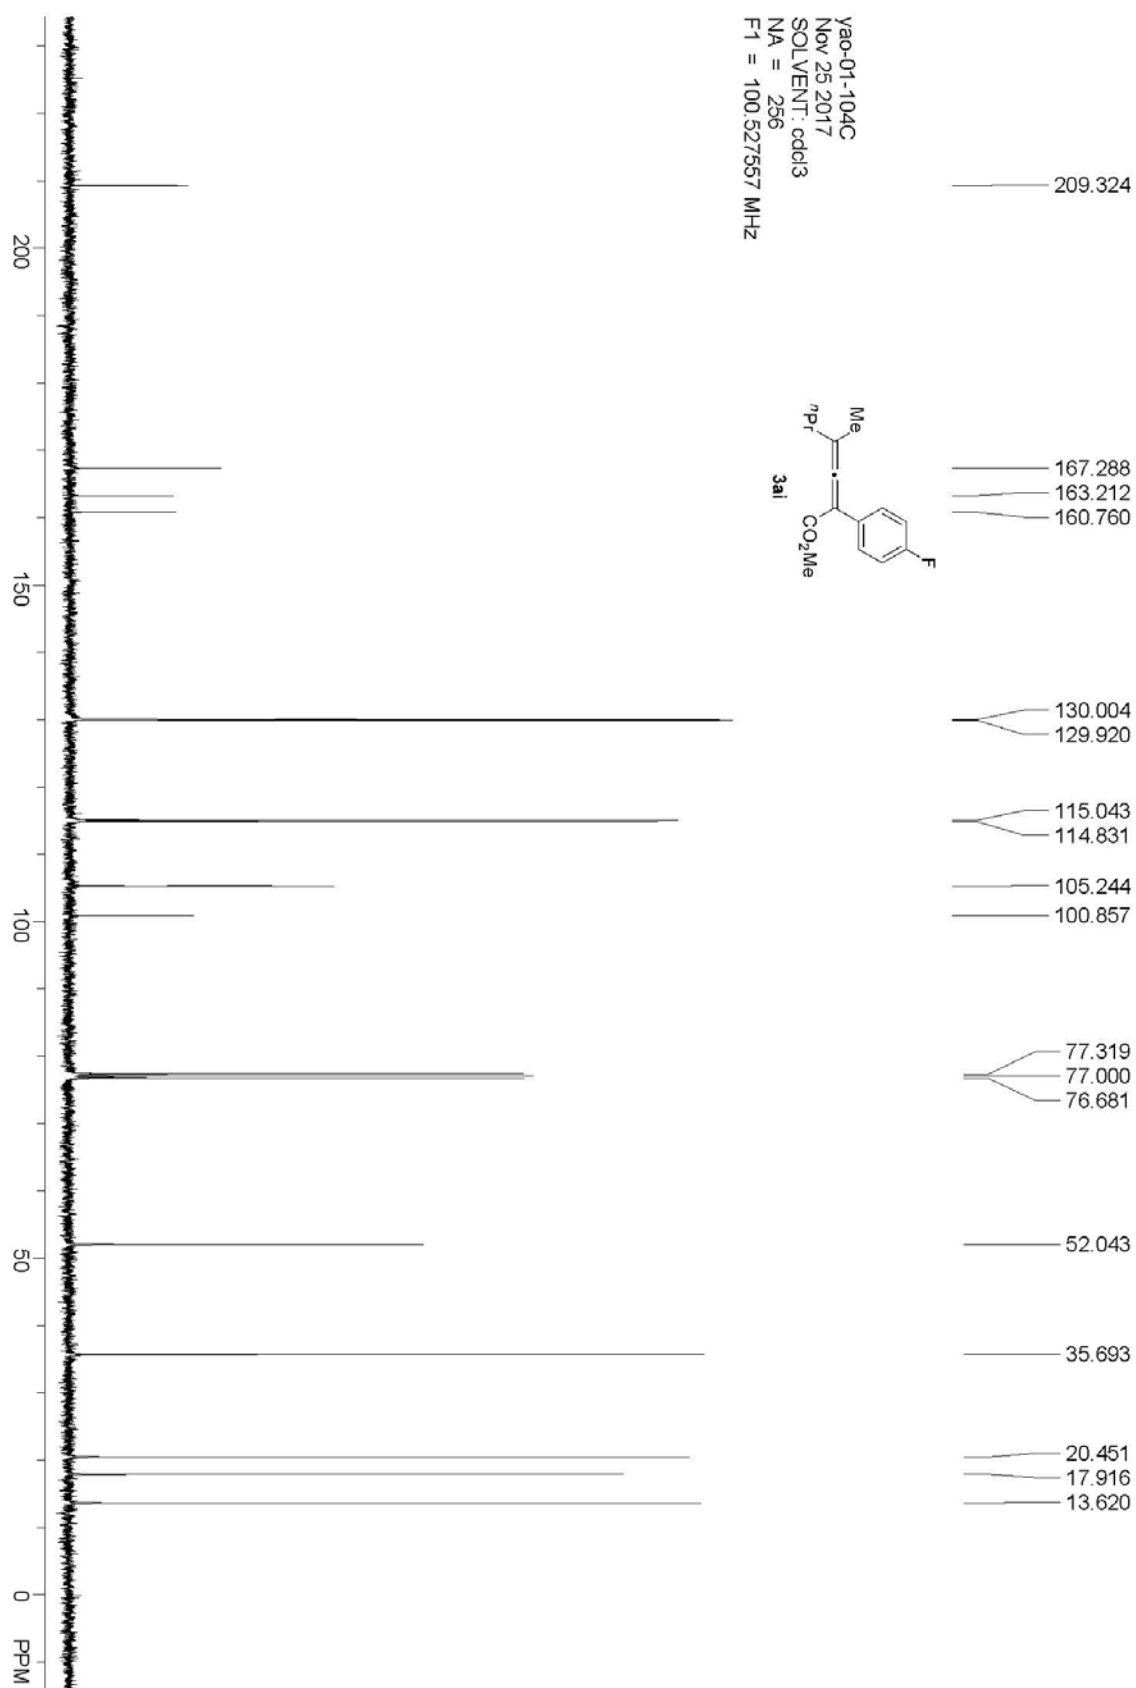

yao-01-104F  
Dec 1 2017  
SOLVENT: cdcl3  
NA = 16  
F1 = 376.106171 MHz

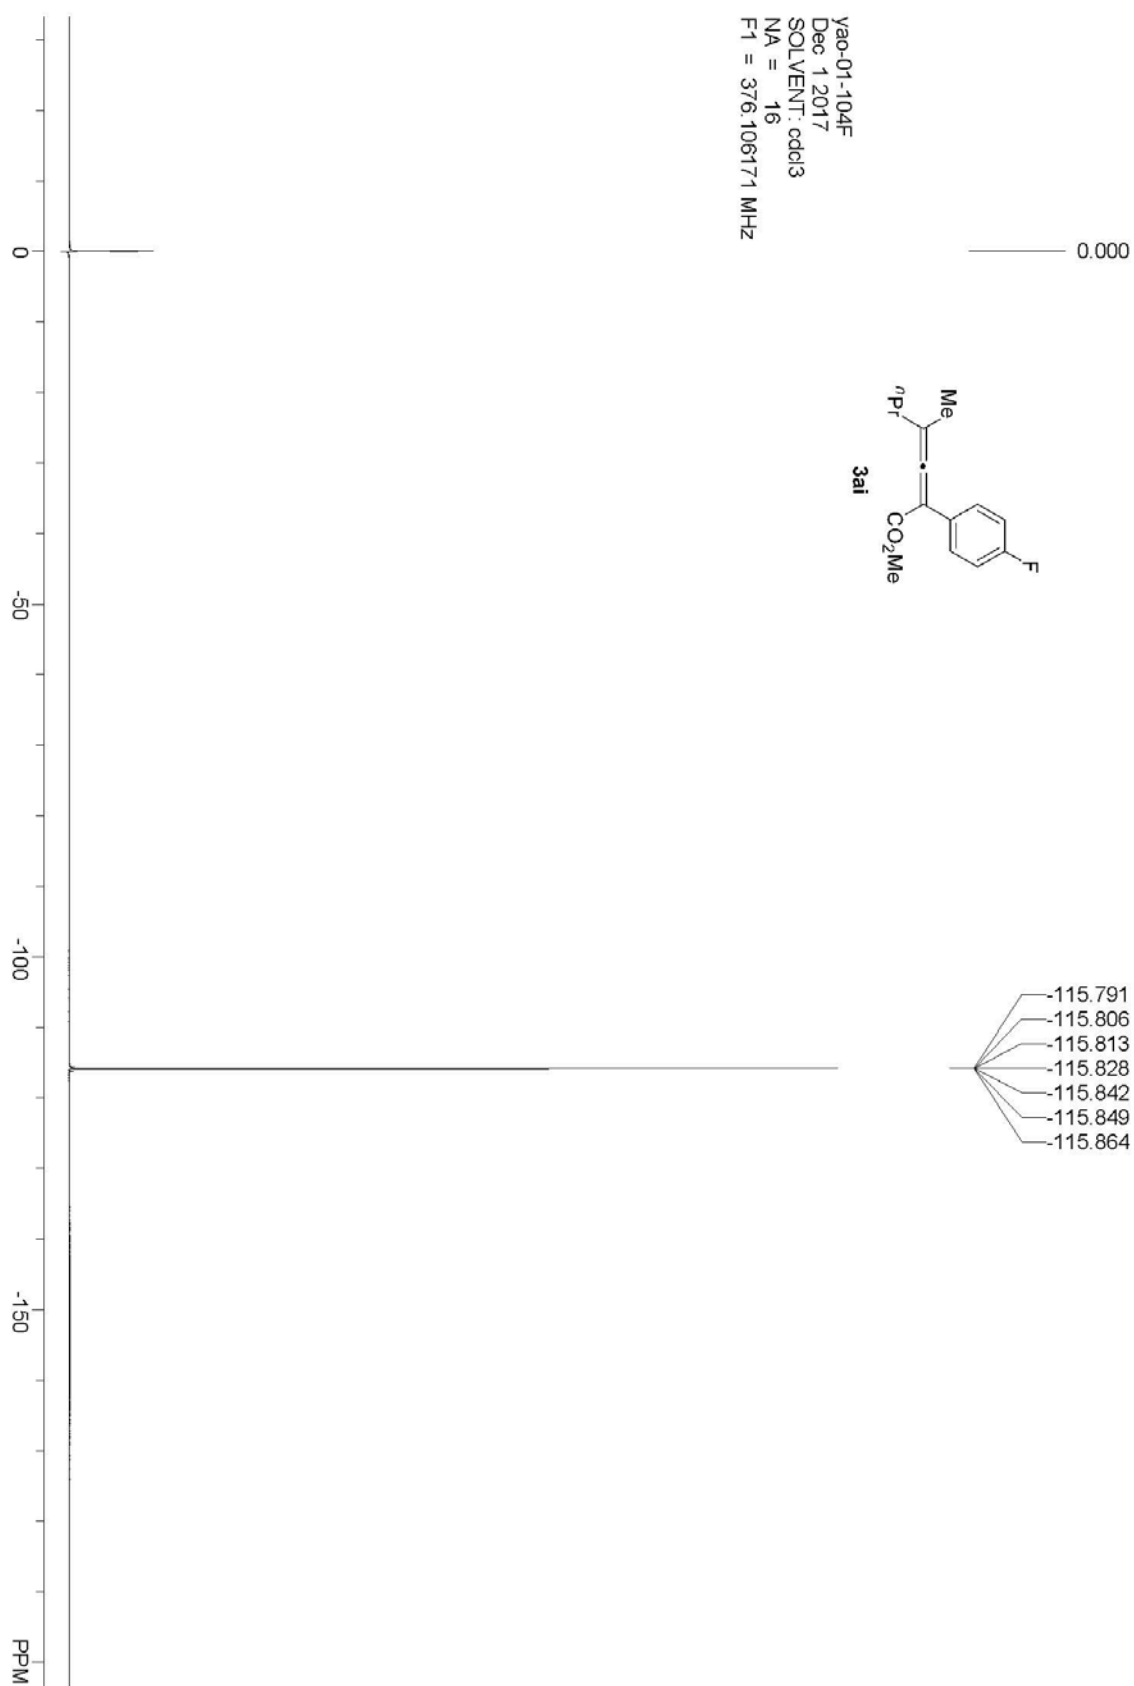

yao-01-106  
 Nov 28 2017  
 SOLVENT: cdcl3  
 NA = 8  
 F1 = 399.749542 MHz

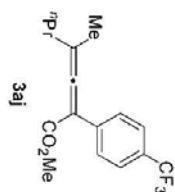

7.626  
 7.604  
 7.577  
 7.556  
 7.253

3.799

2.182  
 2.162  
 2.144  
 1.890  
 1.583  
 1.577  
 1.564  
 1.558  
 1.546  
 1.541  
 1.527  
 1.522  
 1.509  
 1.503  
 1.491  
 1.486  
 0.956  
 0.938  
 0.919  
 0.000

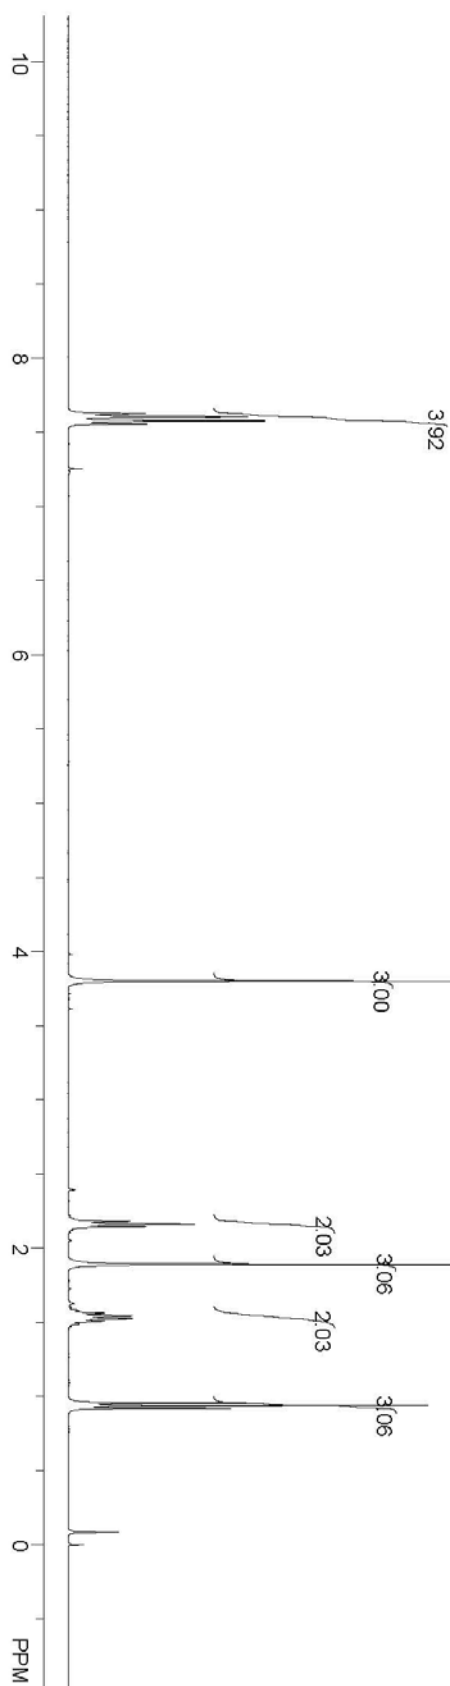

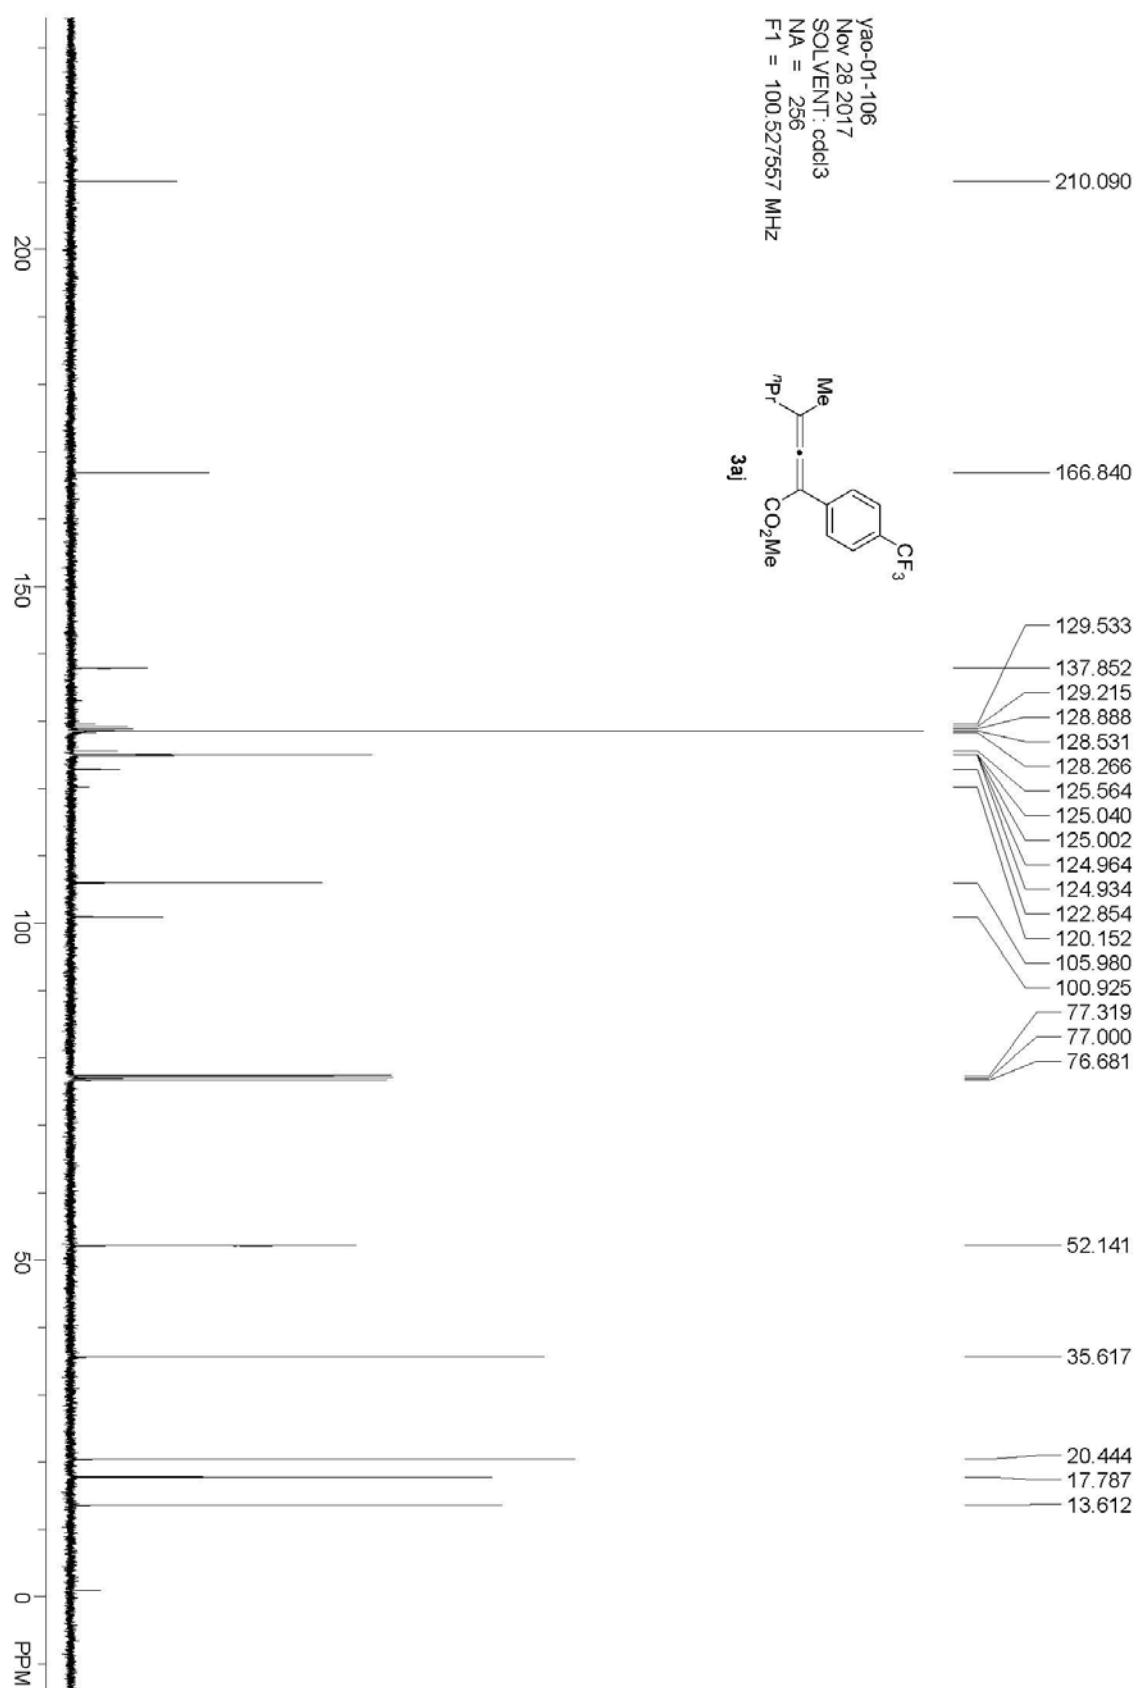

yao-01-106F  
Dec 1 2017  
SOLVENT: cdd13  
NA = 4  
F1 = 376.118774 MHz

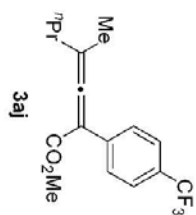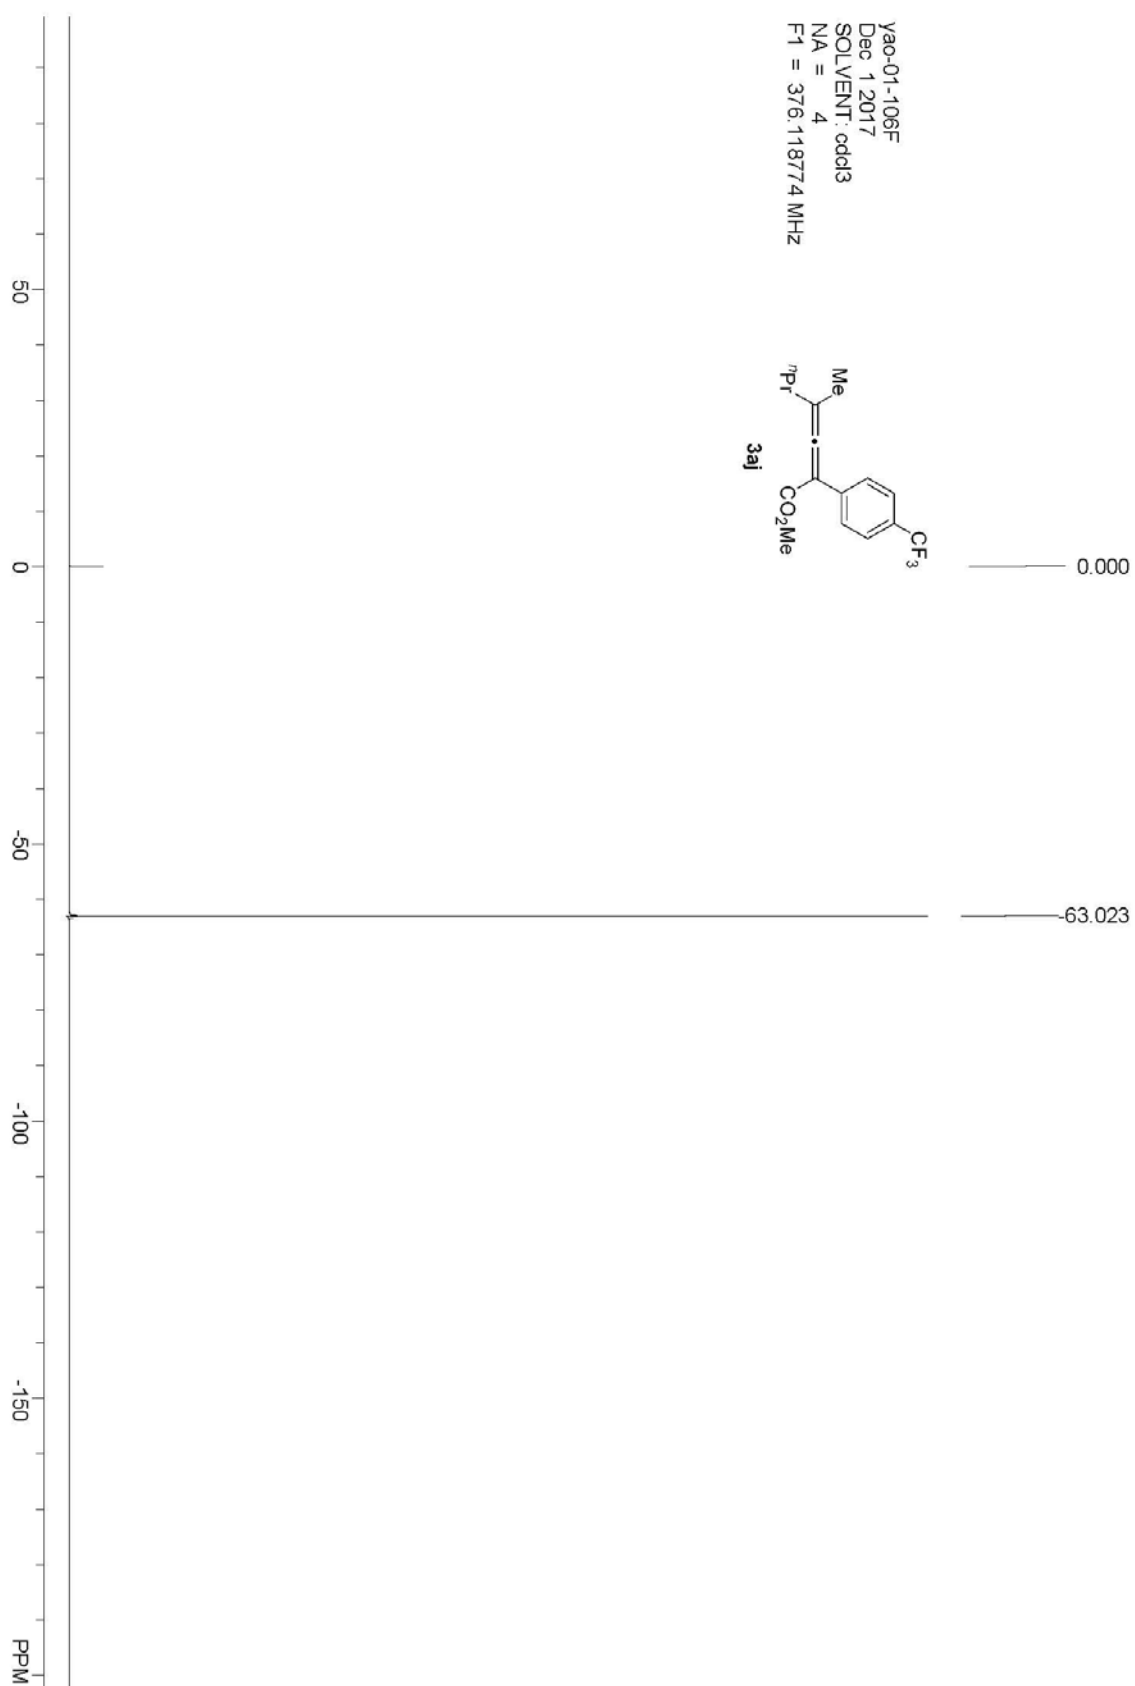

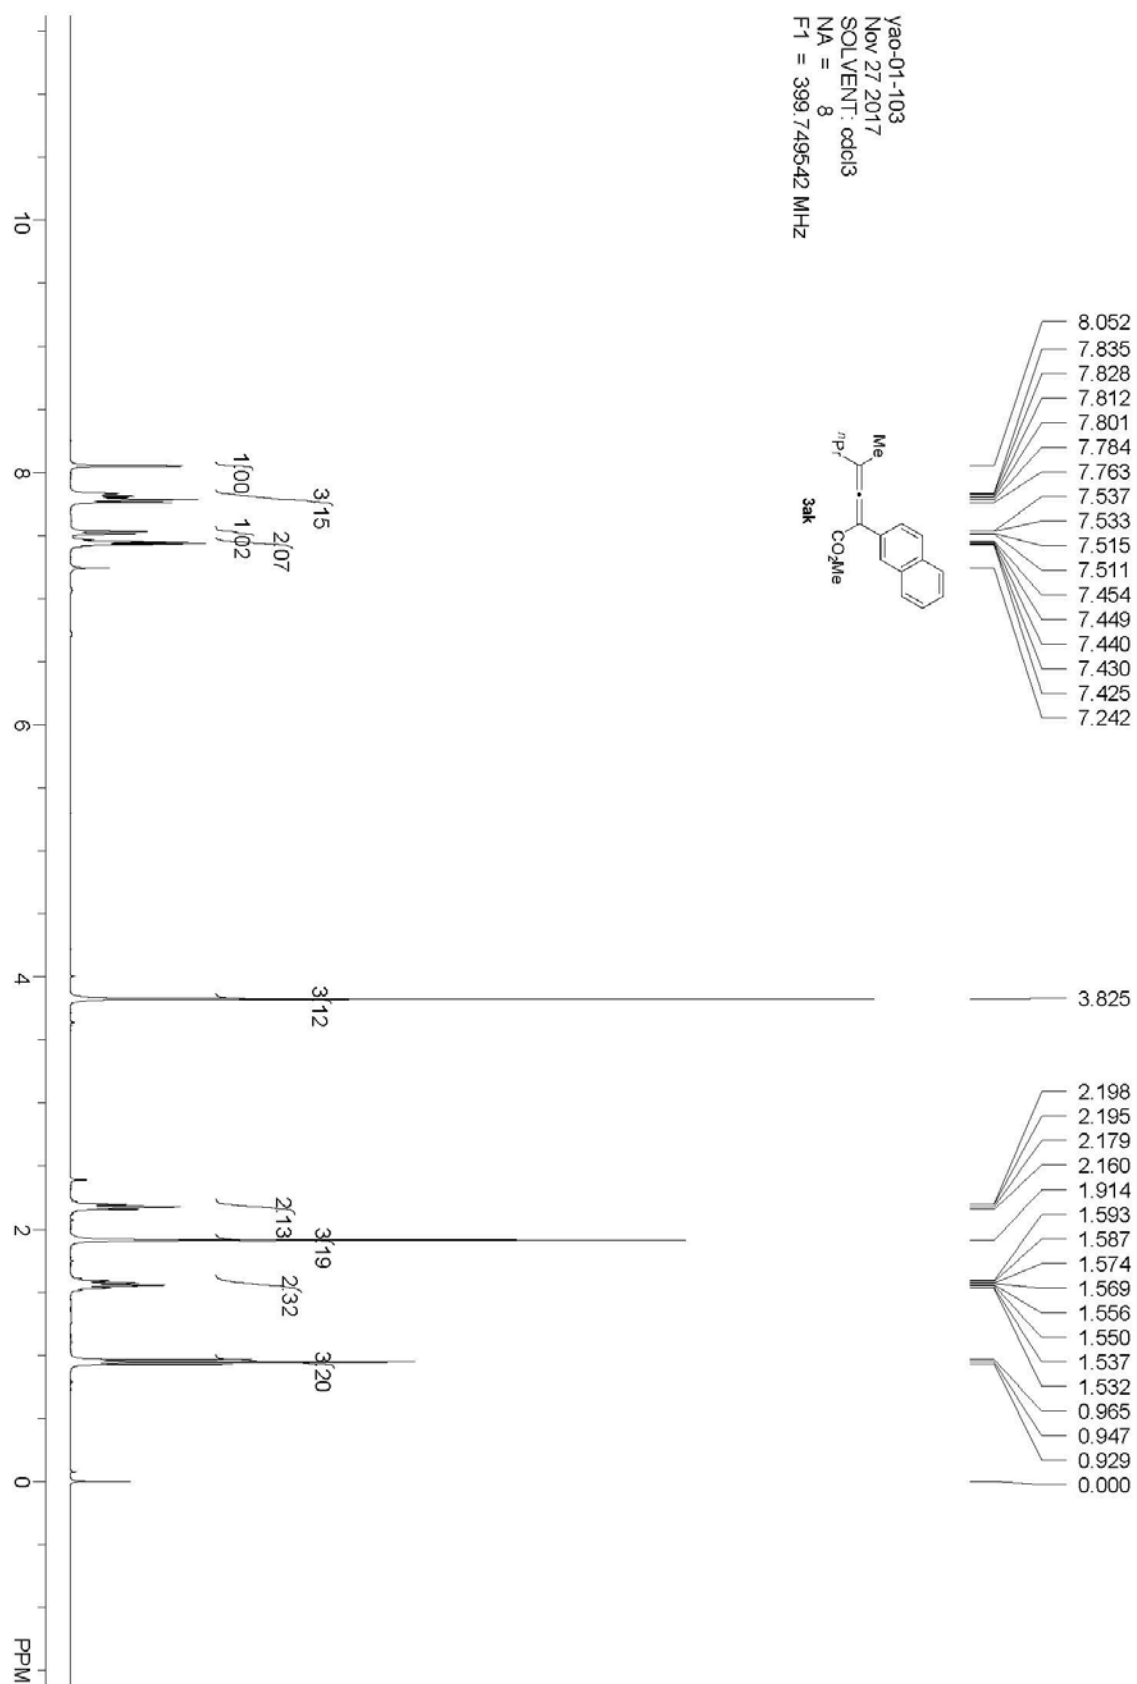

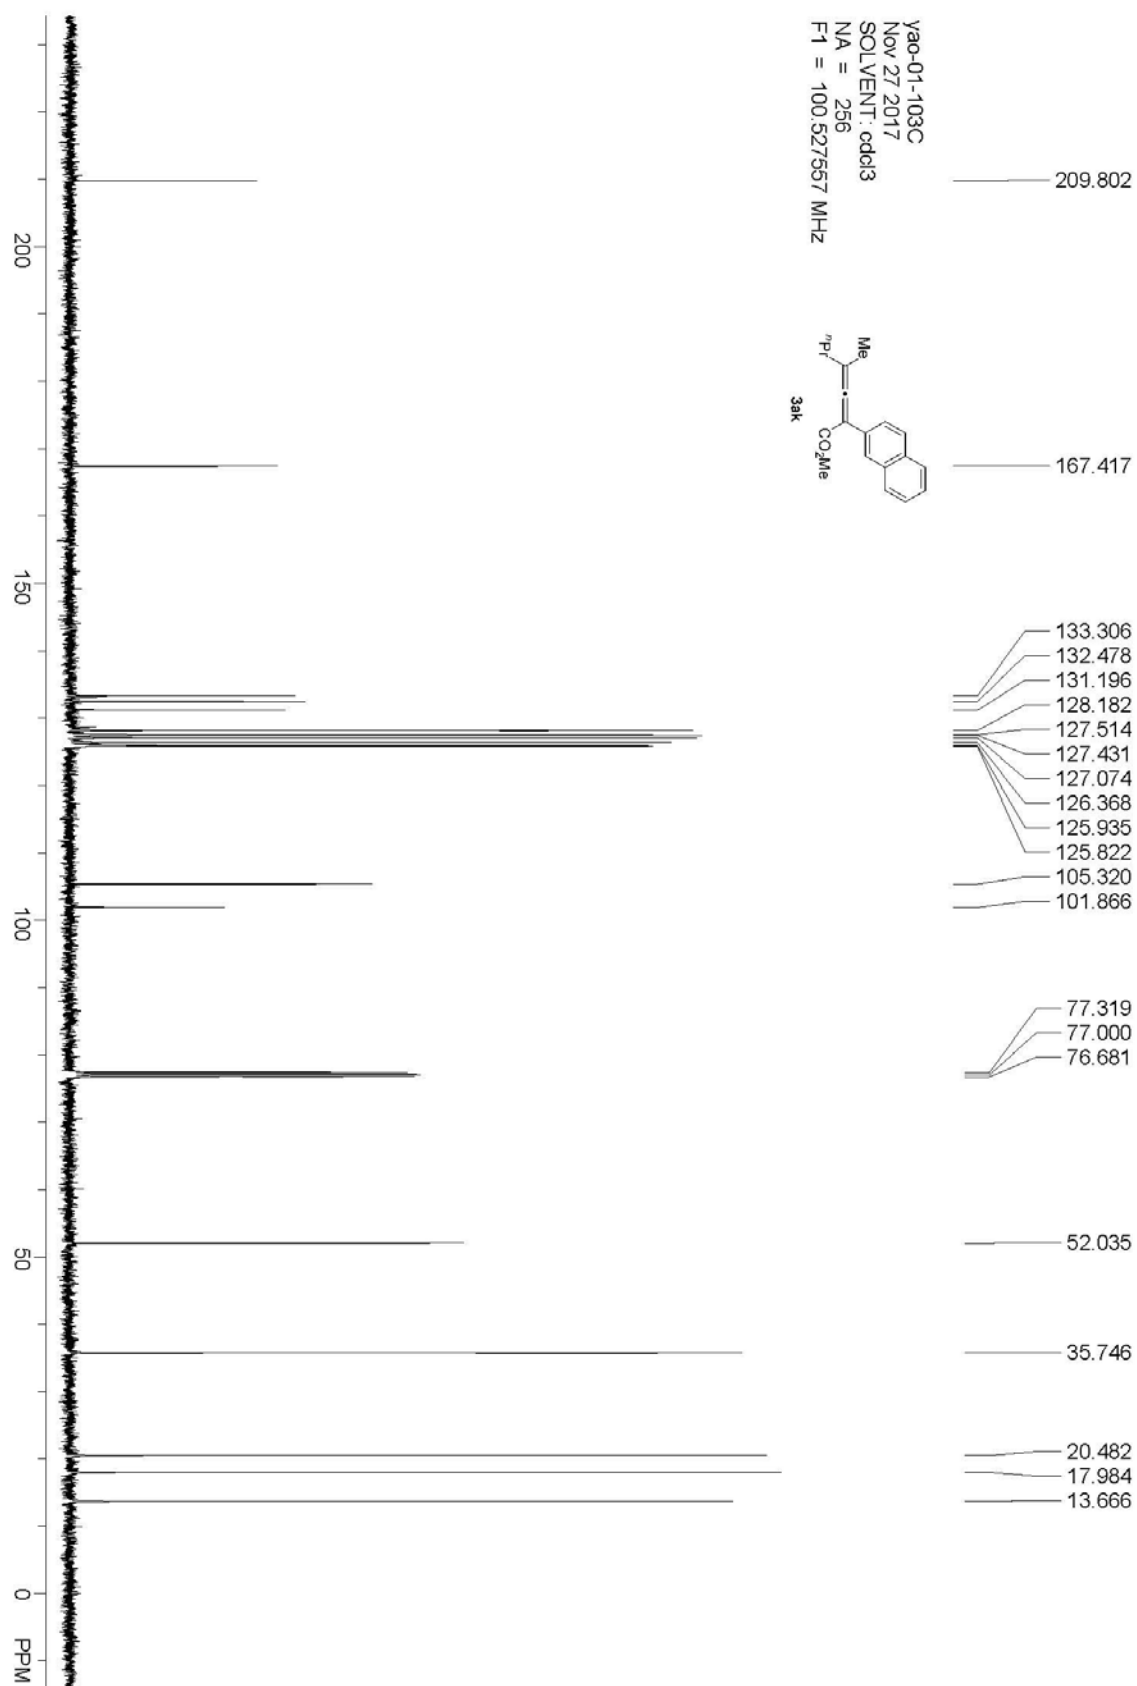

yao-01-107  
 Nov 29 2017  
 SOLVENT: cdcl3  
 NA = 8  
 F1 = 399.749542 MHz

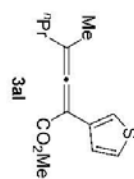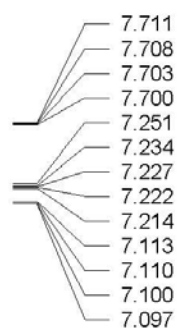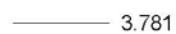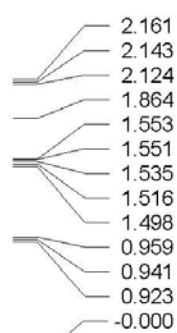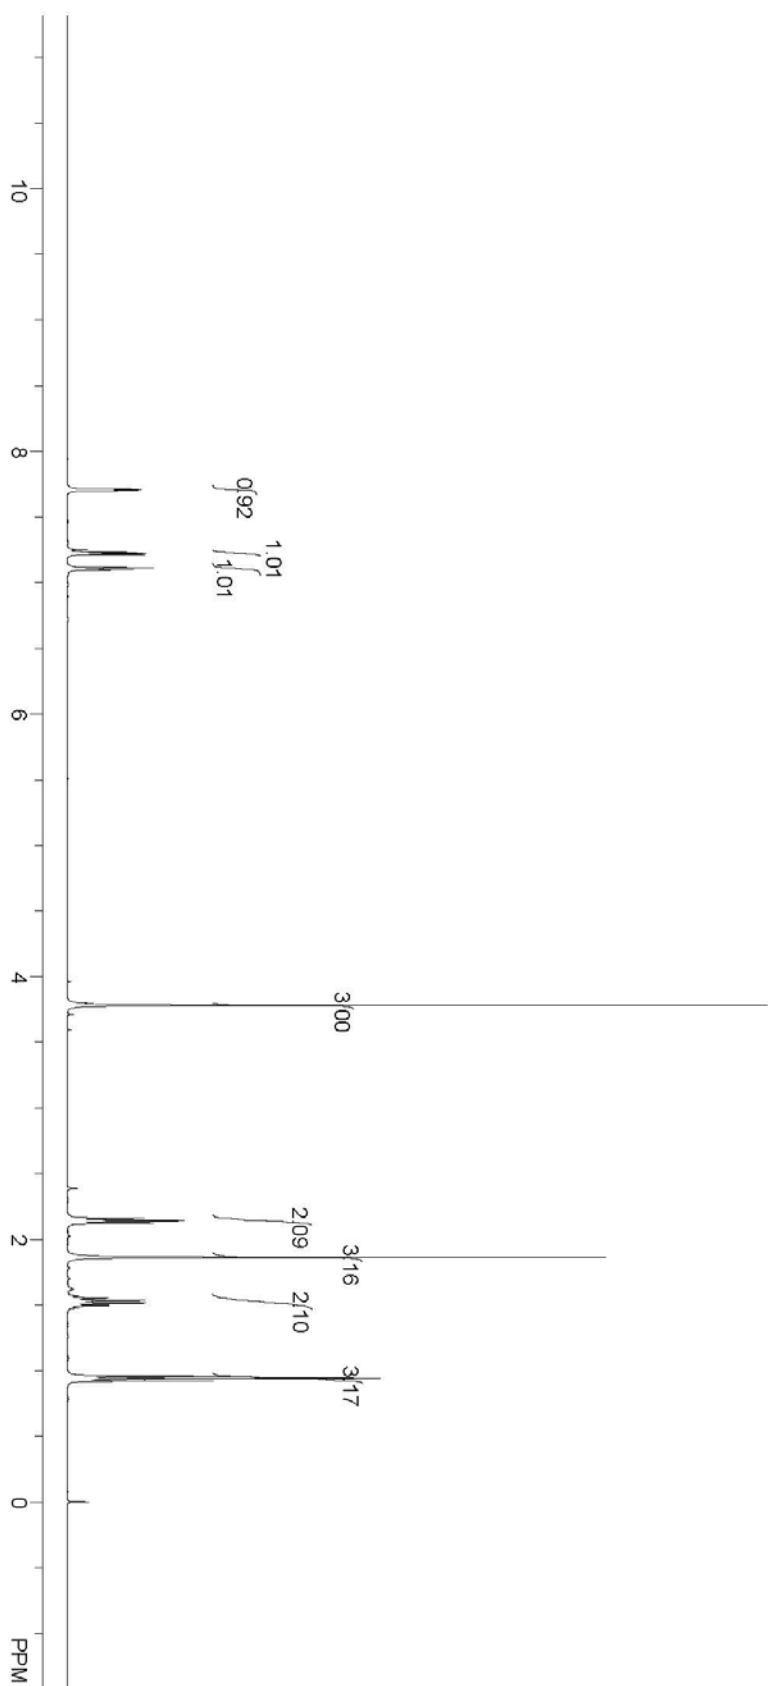

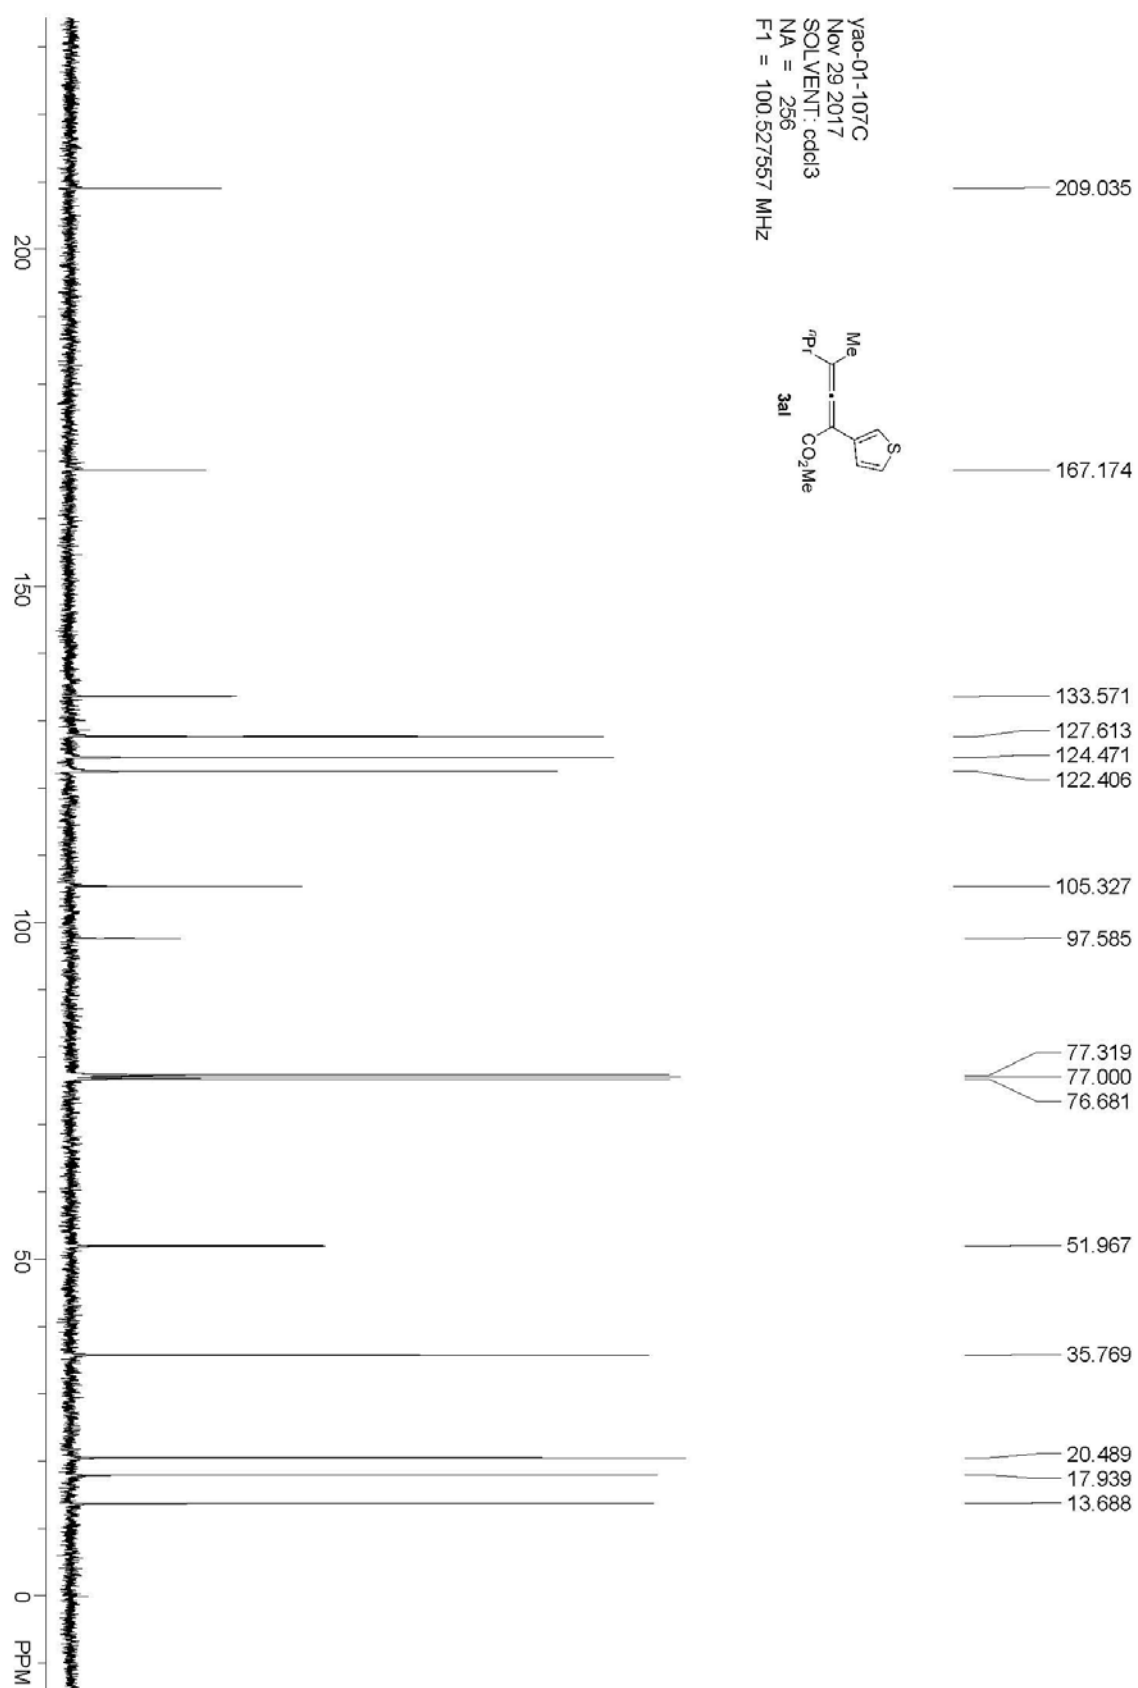

Yao-01-127  
 Dec 20 2017  
 SOLVENT: cdcl3  
 NA = 8  
 F1 = 399.749542 MHz

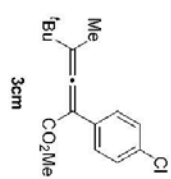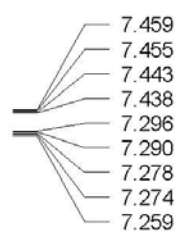

3.780

1.865

1.147

-0.000

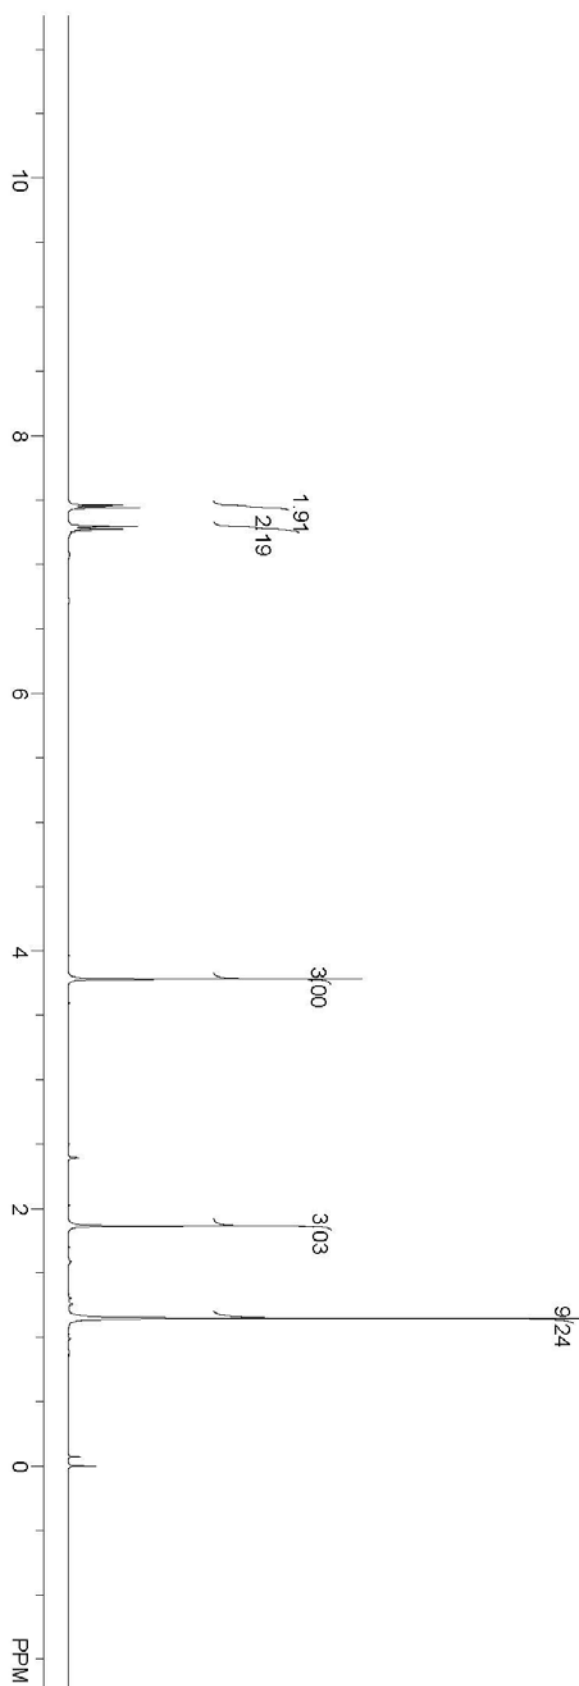

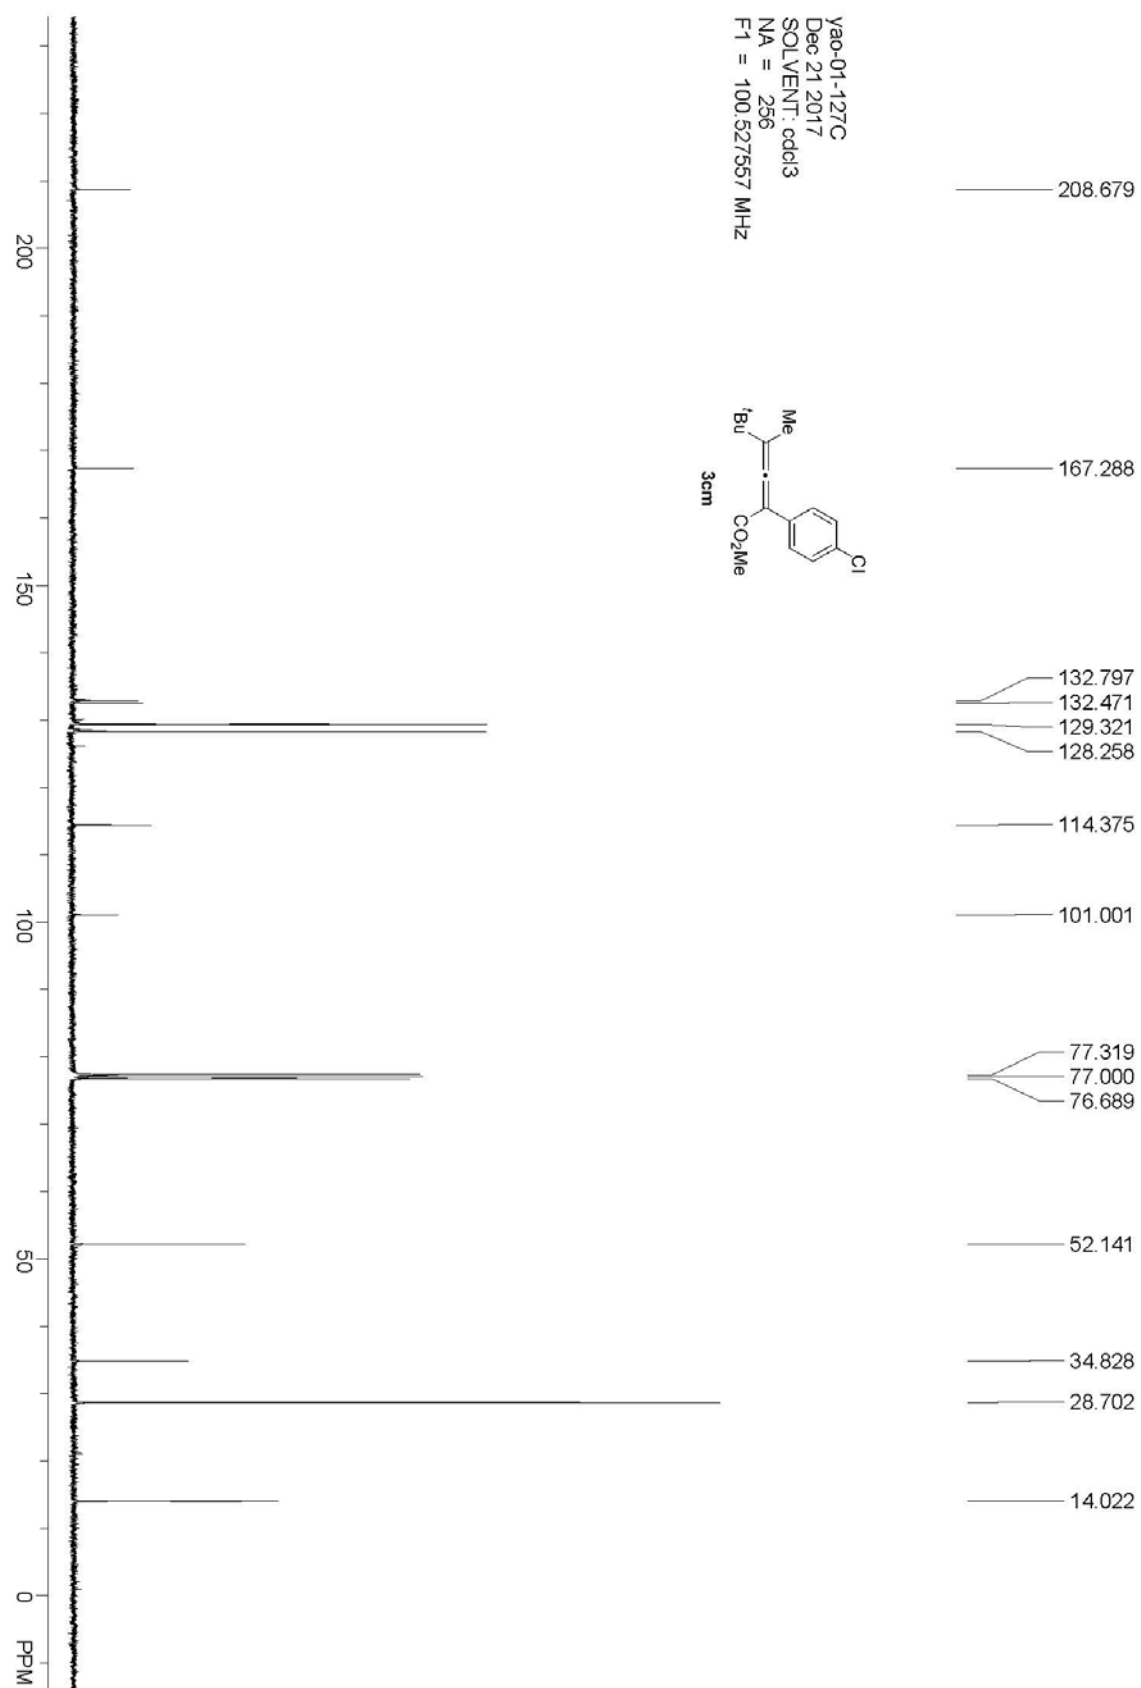

7.460  
7.439  
7.297  
7.292  
7.275  
7.260

4.929

3.780

2.391

1.865

1.147

-0.000

Purity (97%) determined by using CH<sub>2</sub>Br<sub>2</sub> (14.0  $\mu$ L, 0.2 mmol) as the internal standard in 55.8 mg of sample

yao-01-127ccd  
Dec 22 2017  
SOLVENT: cdcl3  
Recycle delay = 20.000 sec  
NA = 4  
F1 = 399.749542 MHz

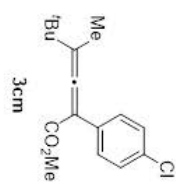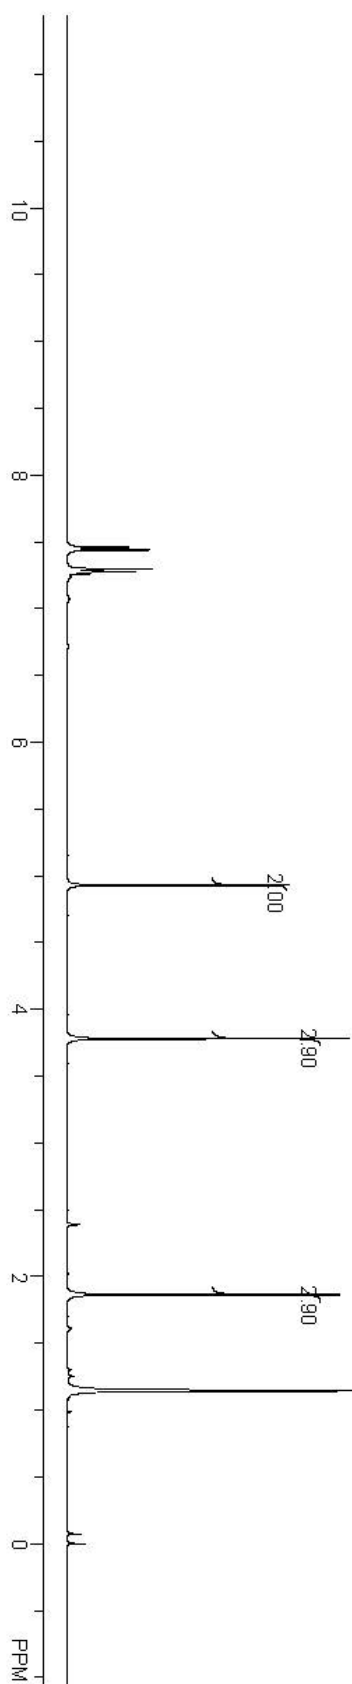

Yao-01-123  
 Dec 13 2017  
 SOLVENT: cdcl3  
 NA = 8  
 F1 = 399.749542 MHz

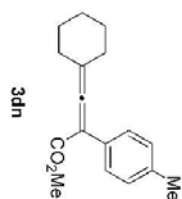

7.370  
 7.350  
 7.256  
 7.145  
 7.126

3.780  
 2.337  
 2.313  
 2.298  
 2.284  
 1.747  
 1.732  
 1.719  
 1.706  
 1.690  
 1.672  
 1.660  
 1.656  
 1.645  
 1.631  
 1.614  
 1.610  
 1.601  
 1.593  
 1.584  
 1.575  
 1.565  
 -0.000

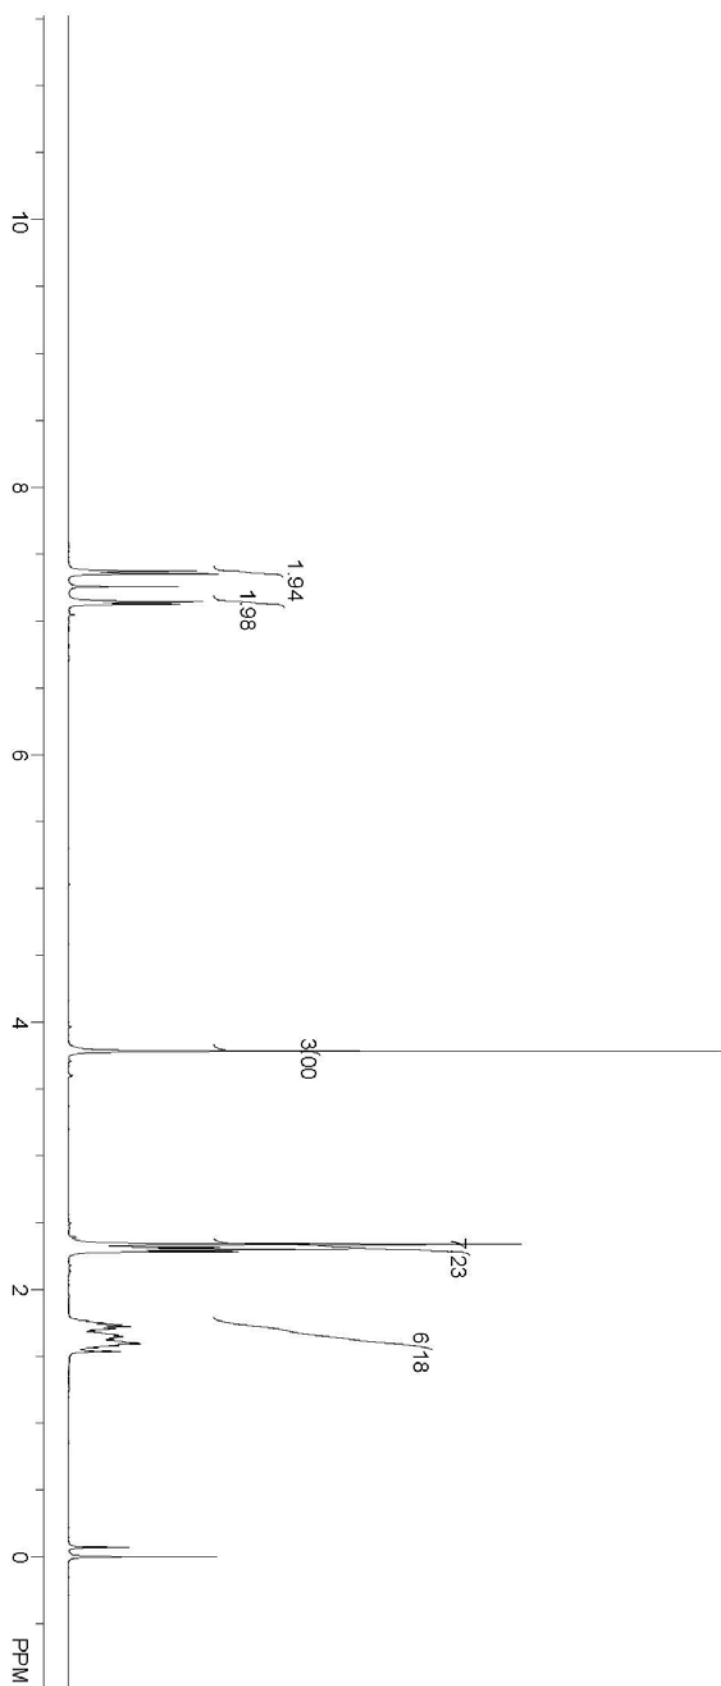

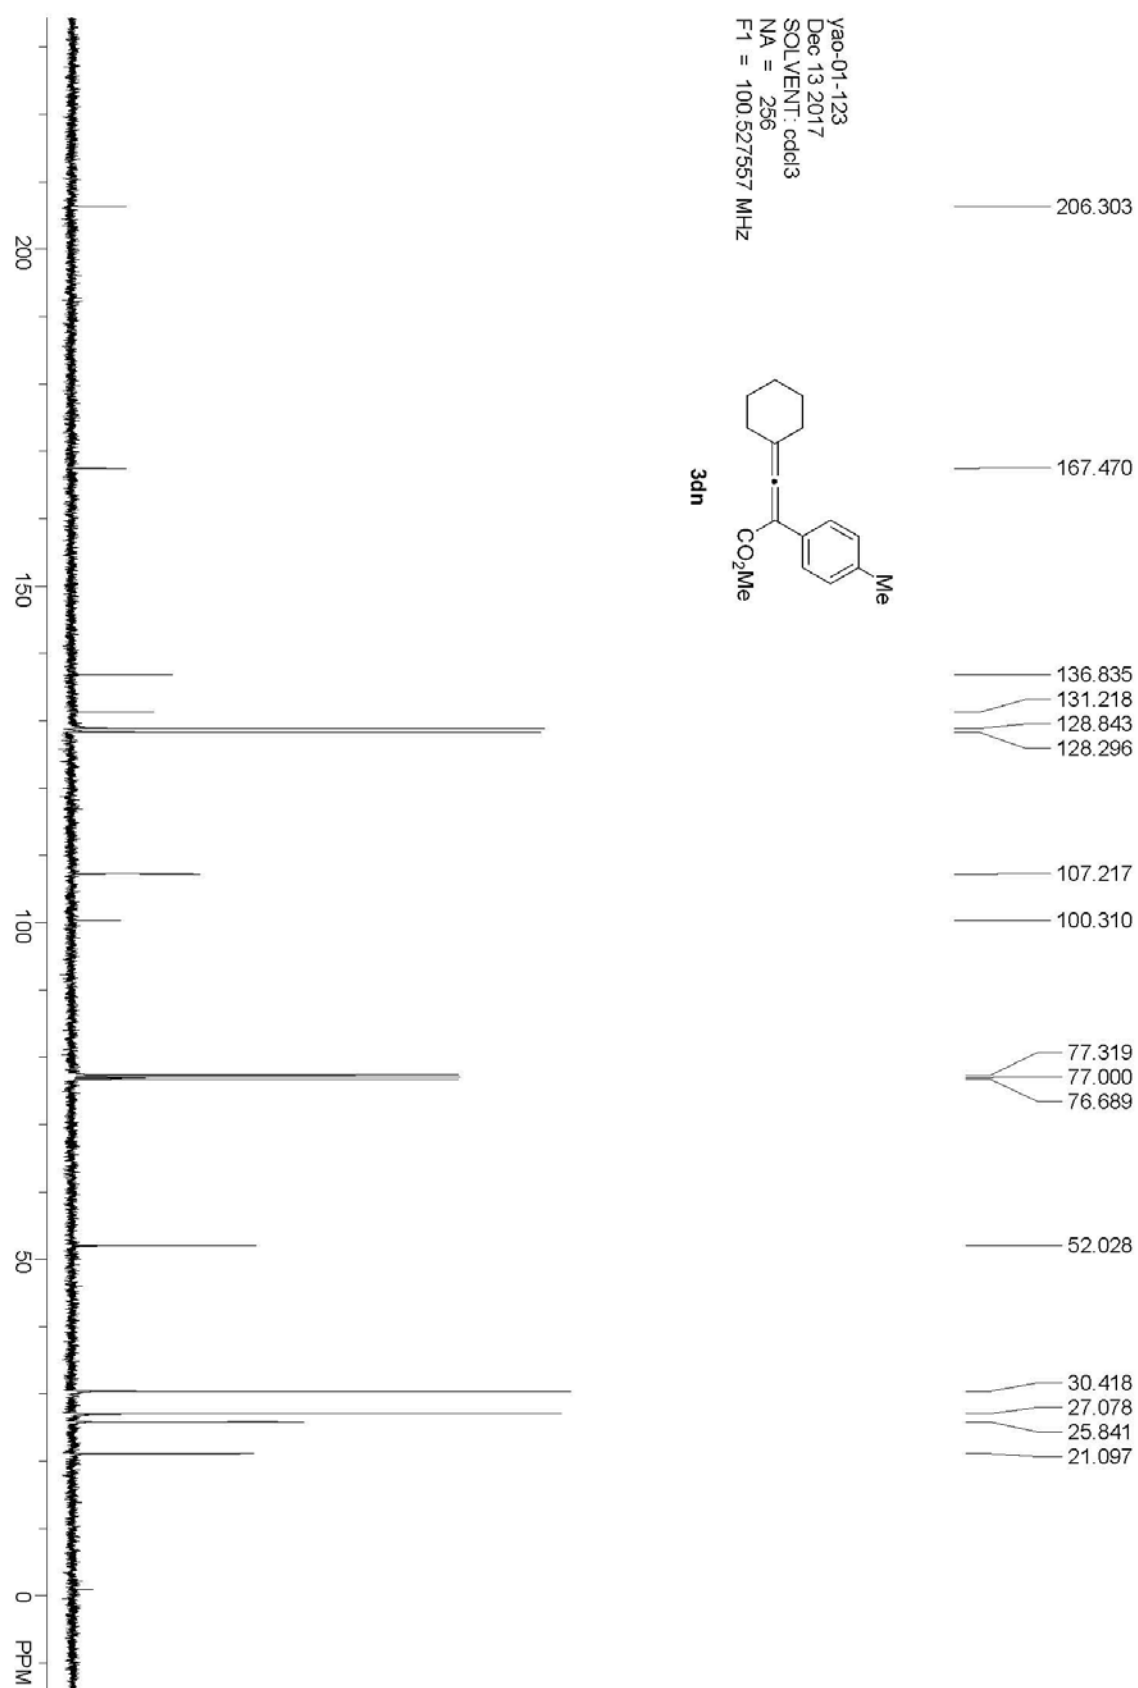

yao-01-72  
 Nov 7 2017  
 SOLVENT: cdcl3  
 NA = 8  
 F1 = 399.749542 MHz

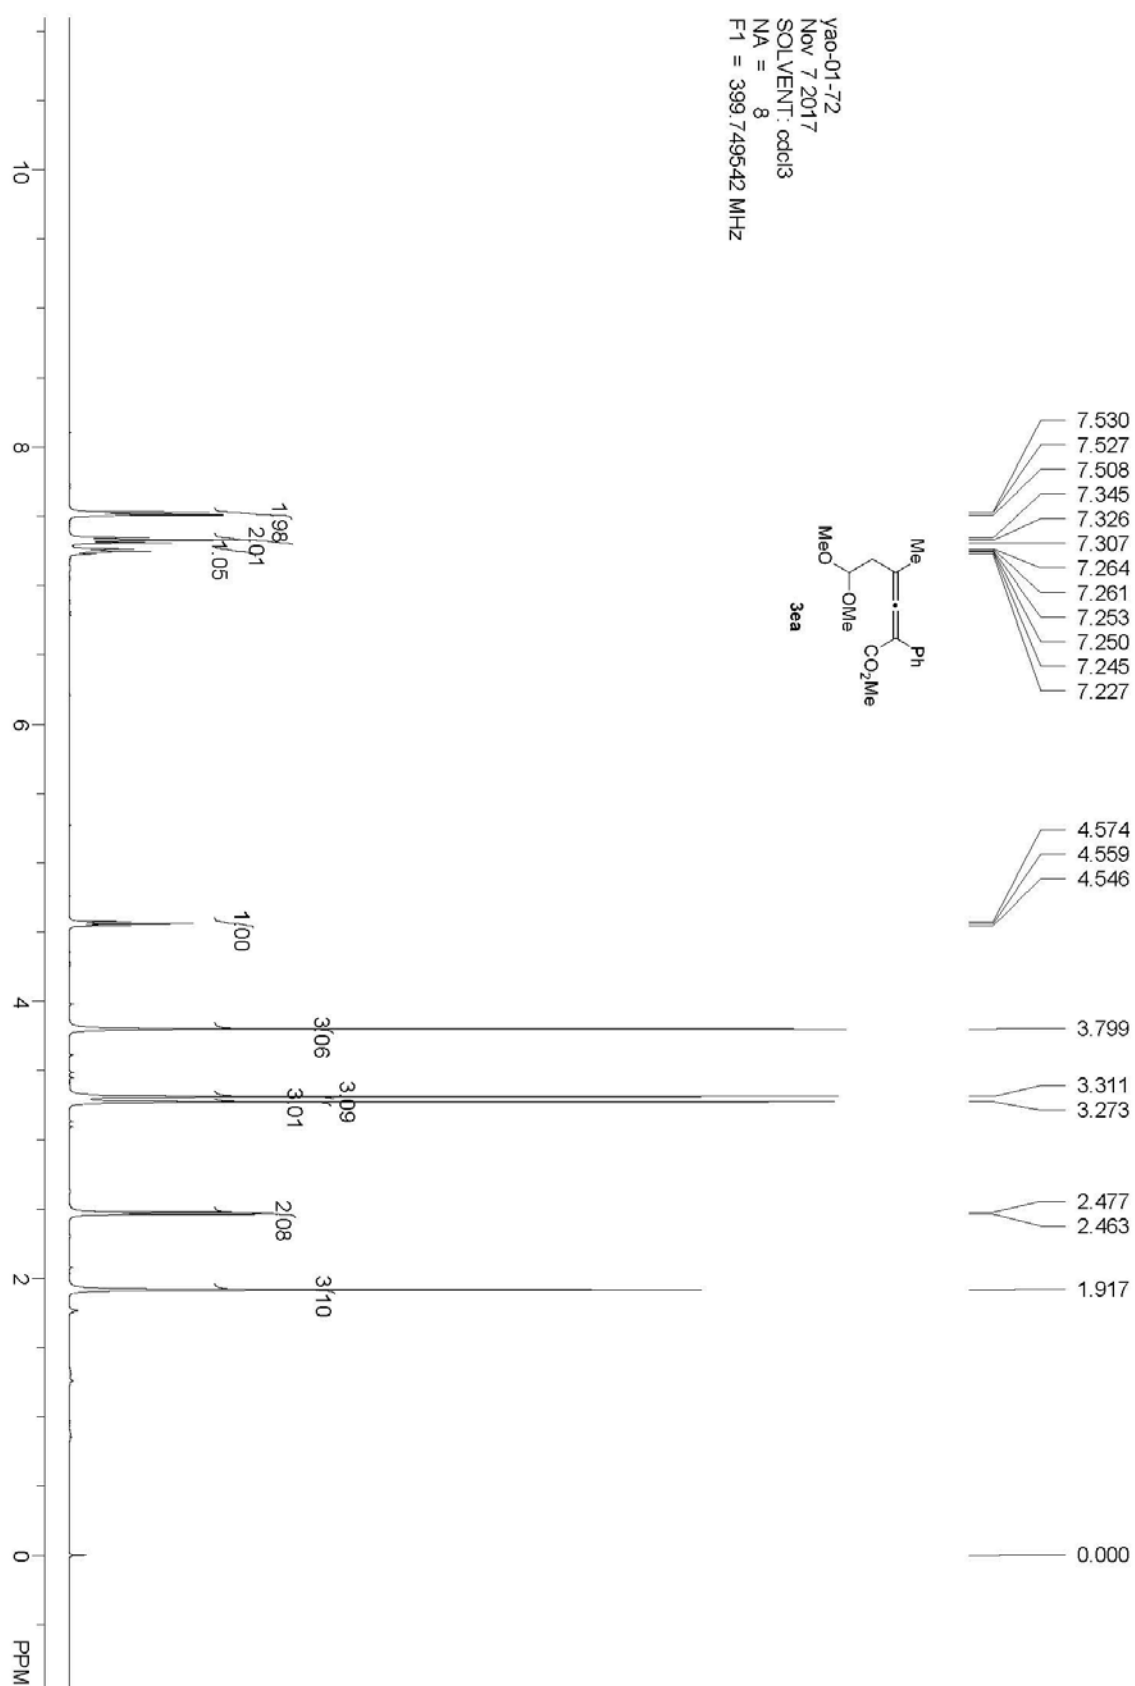

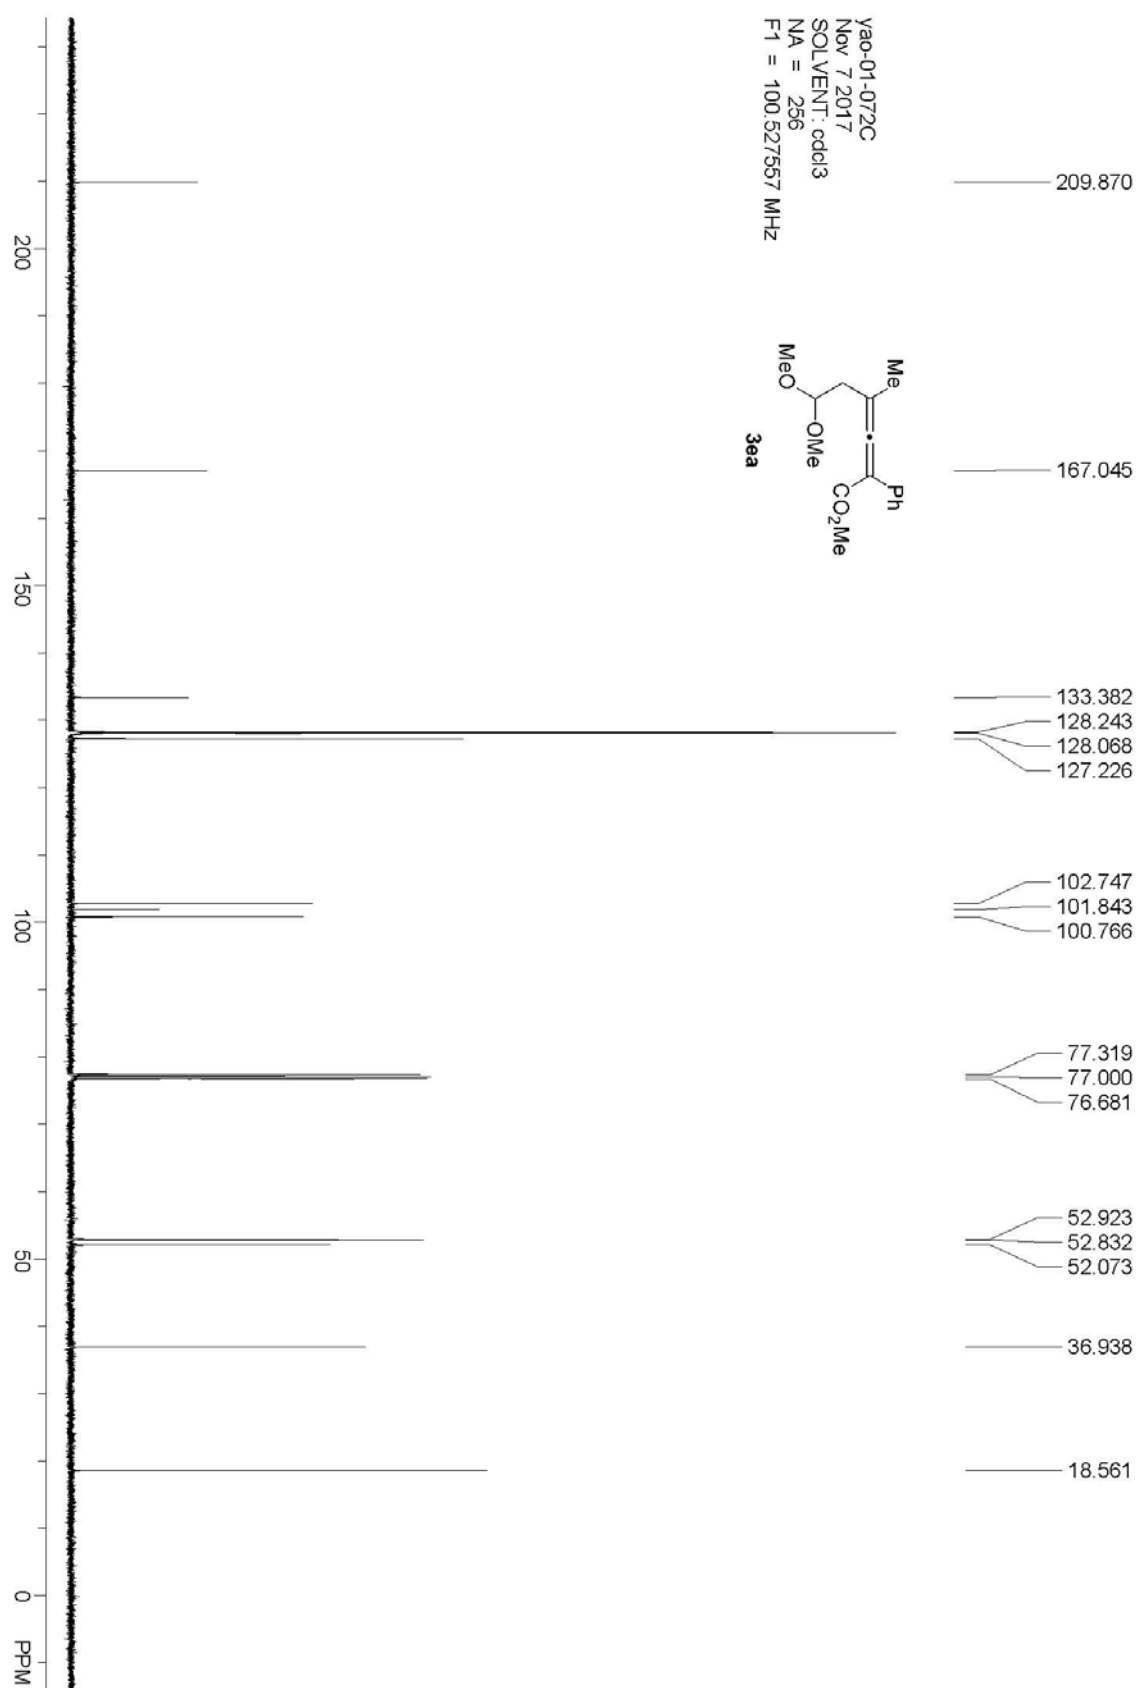

yao-01-117  
 Dec 9 2017  
 SOLVENT: cdcl3  
 NA = 8  
 F1 = 399.749542 MHz

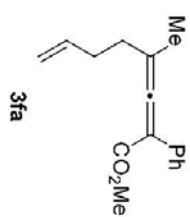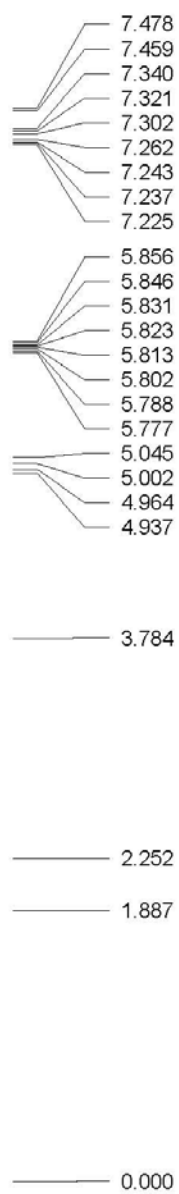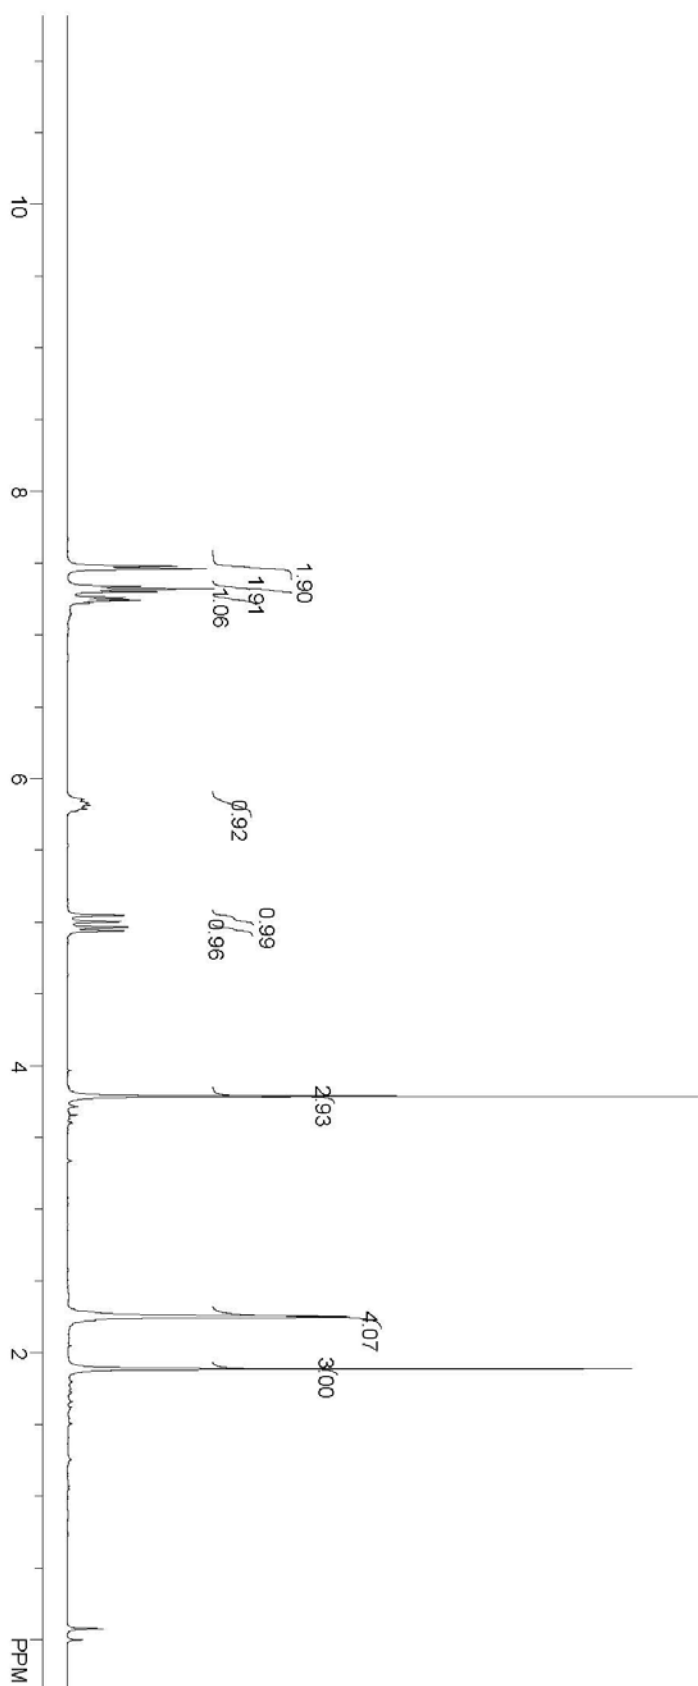

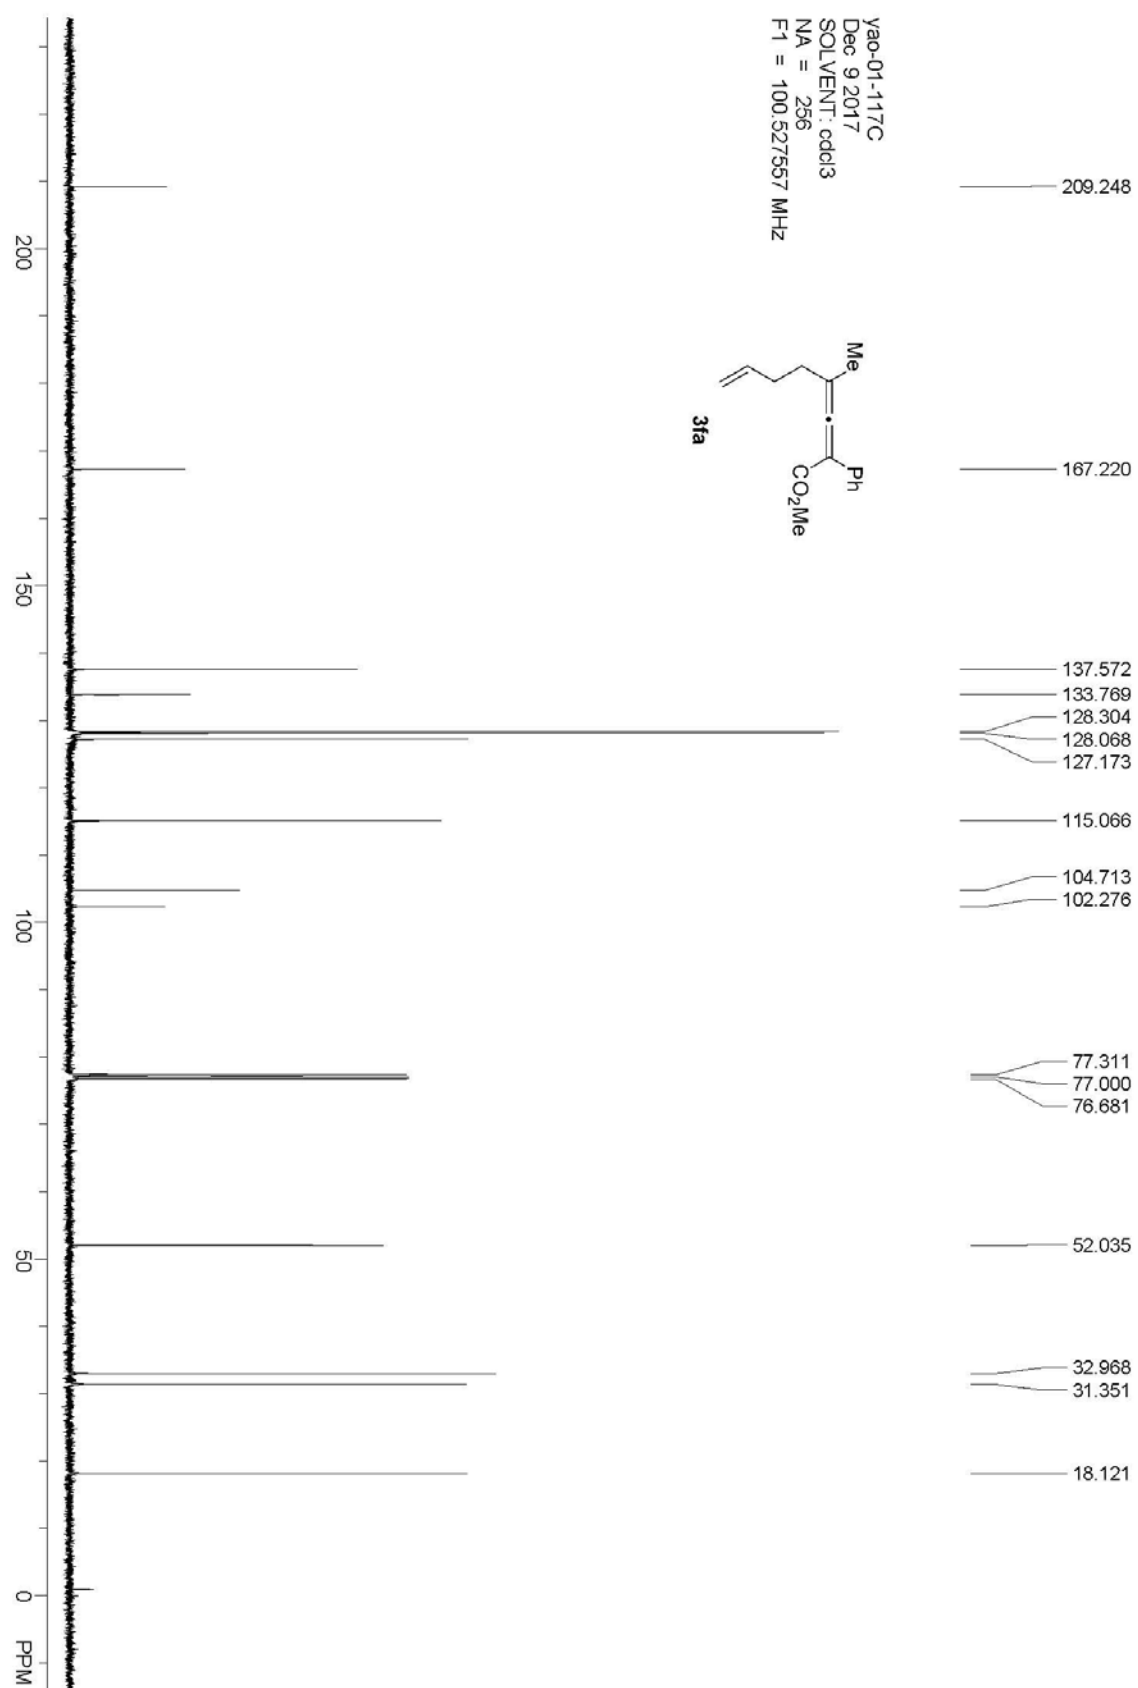

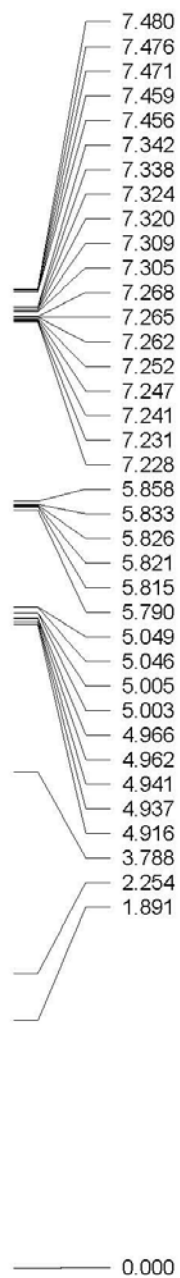

yao-01-117.ccd  
Dec 9 2017  
SOLVENT: cdcl3  
NA = 4  
F1 = 399.749542 MHz

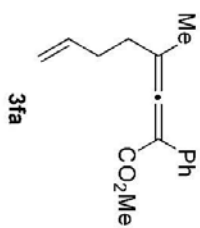

Purity (100%) determined by using CH<sub>2</sub>Br<sub>2</sub> (14.0  $\mu$ L, 0.2 mmol) as the internal standard in 48.0 mg of sample.

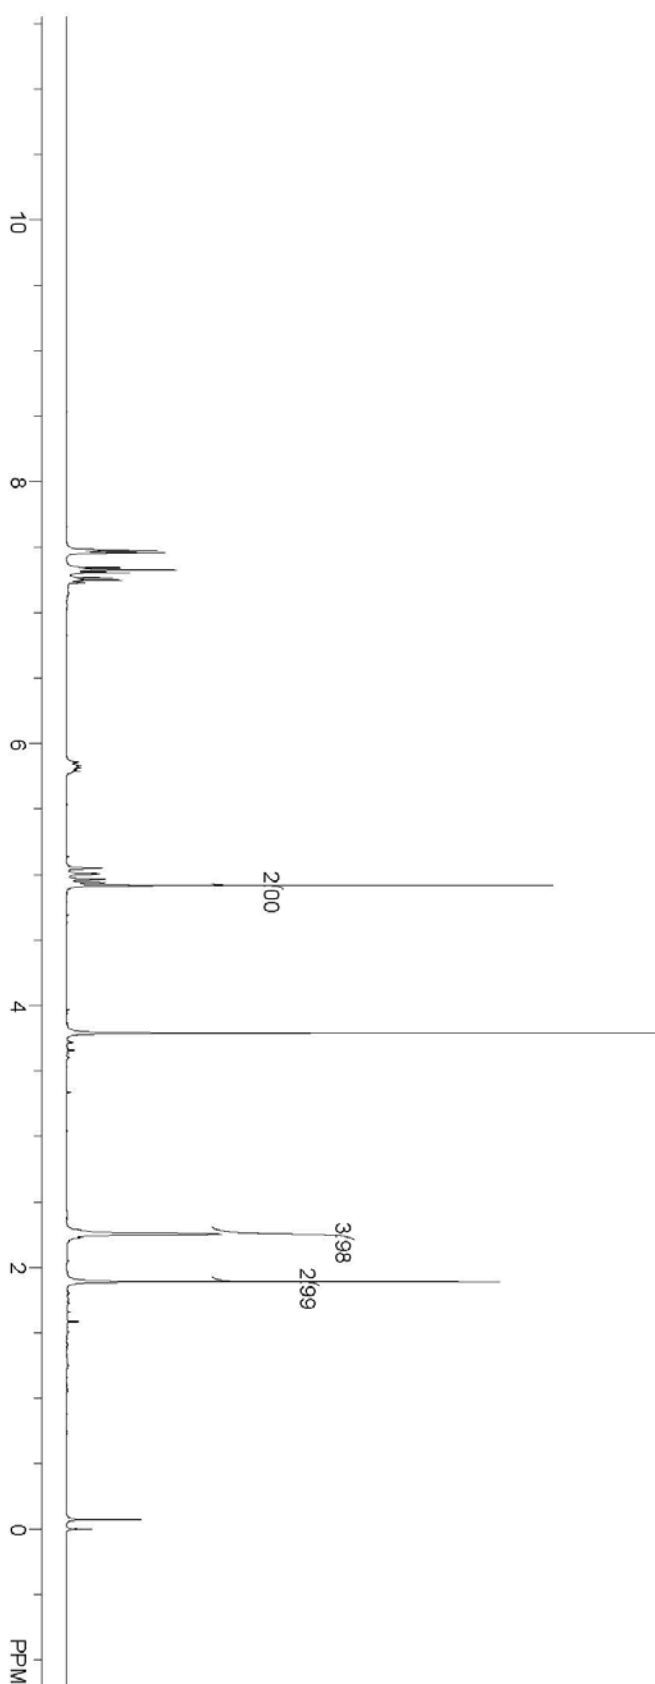

Yao-01-132  
Dec 21 2017  
SOLVENT: cdcl3  
NA = 8  
F1 = 399.749542 MHz

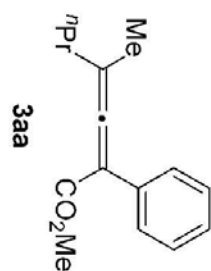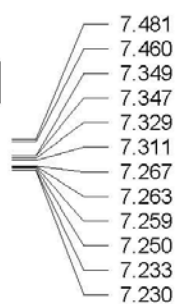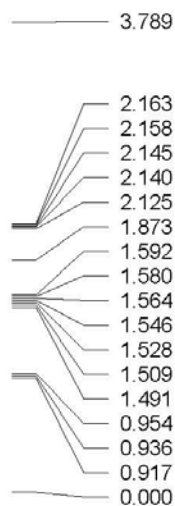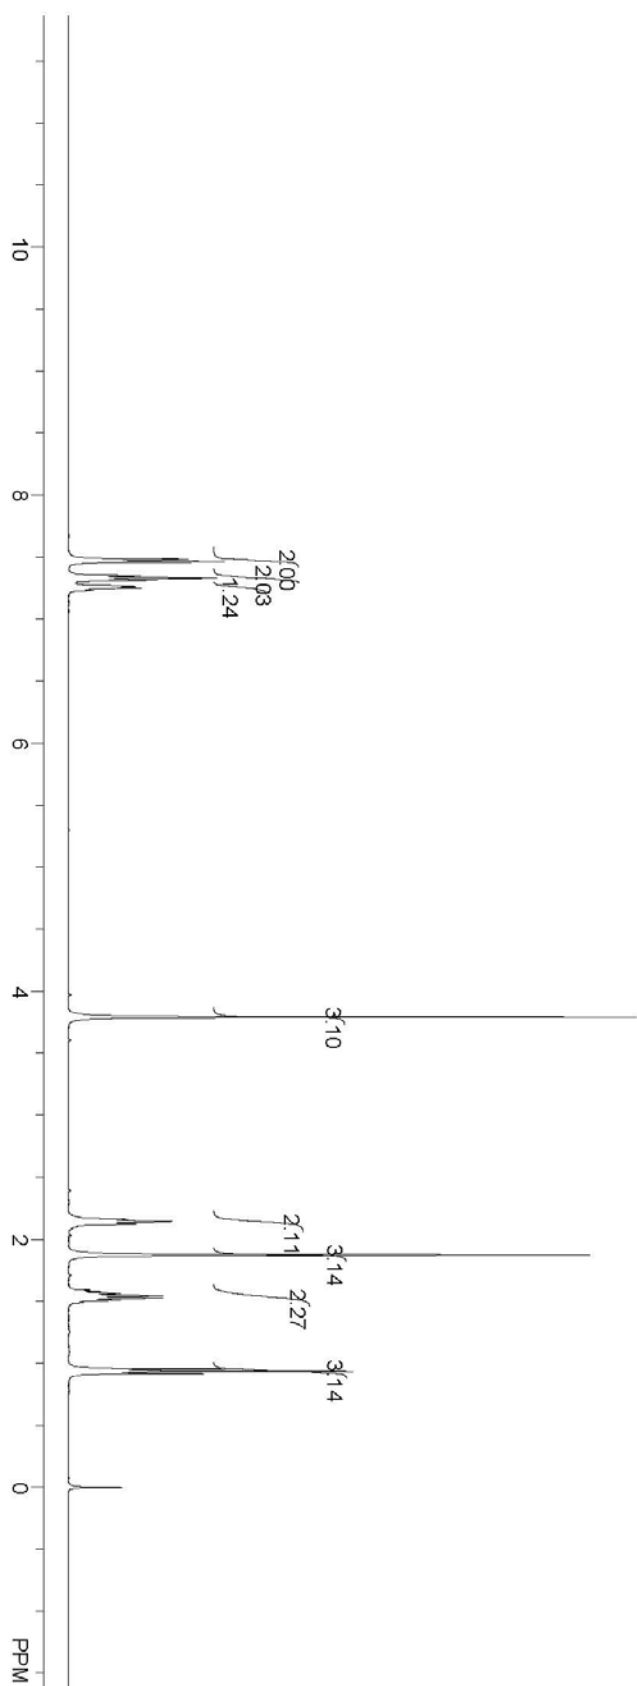

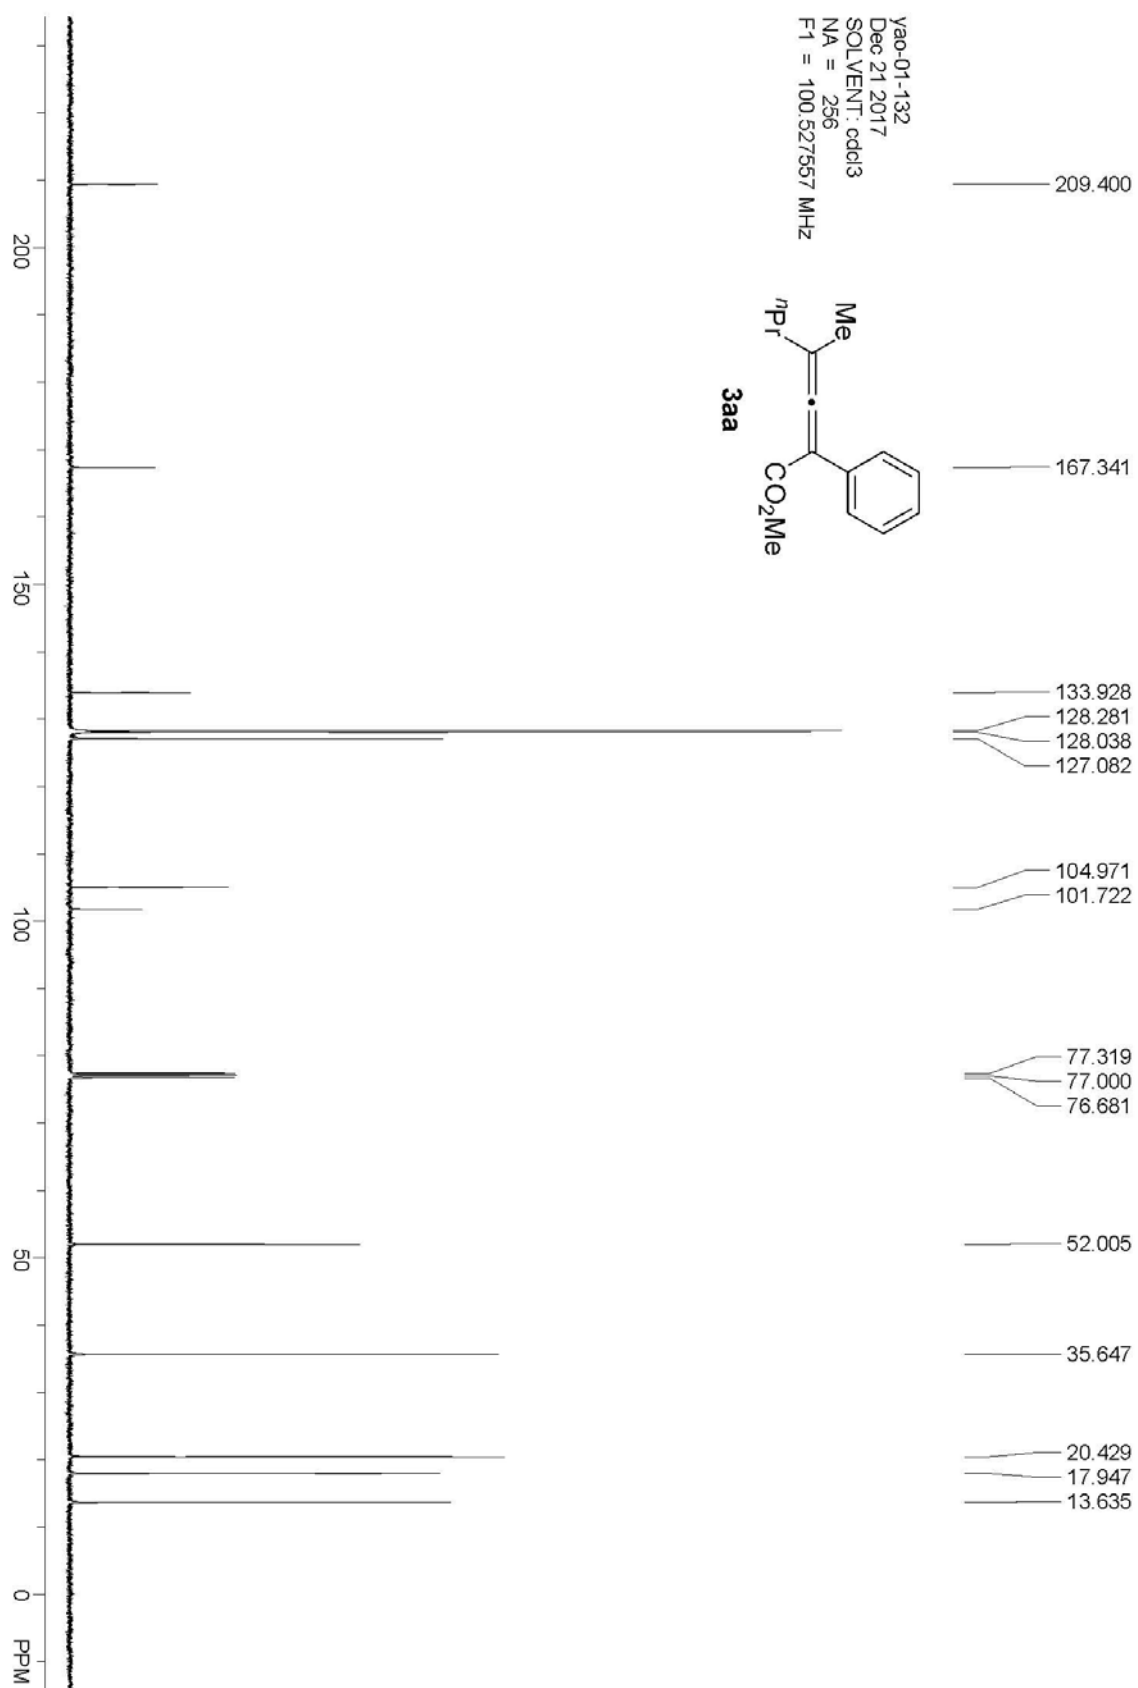

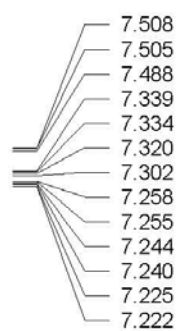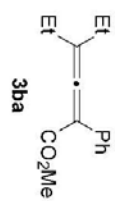

yao-01-145  
Jan 9 2018  
SOLVENT: cdcl3  
NA = 8  
F1 = 399.749542 MHz

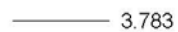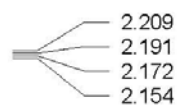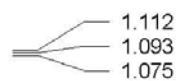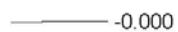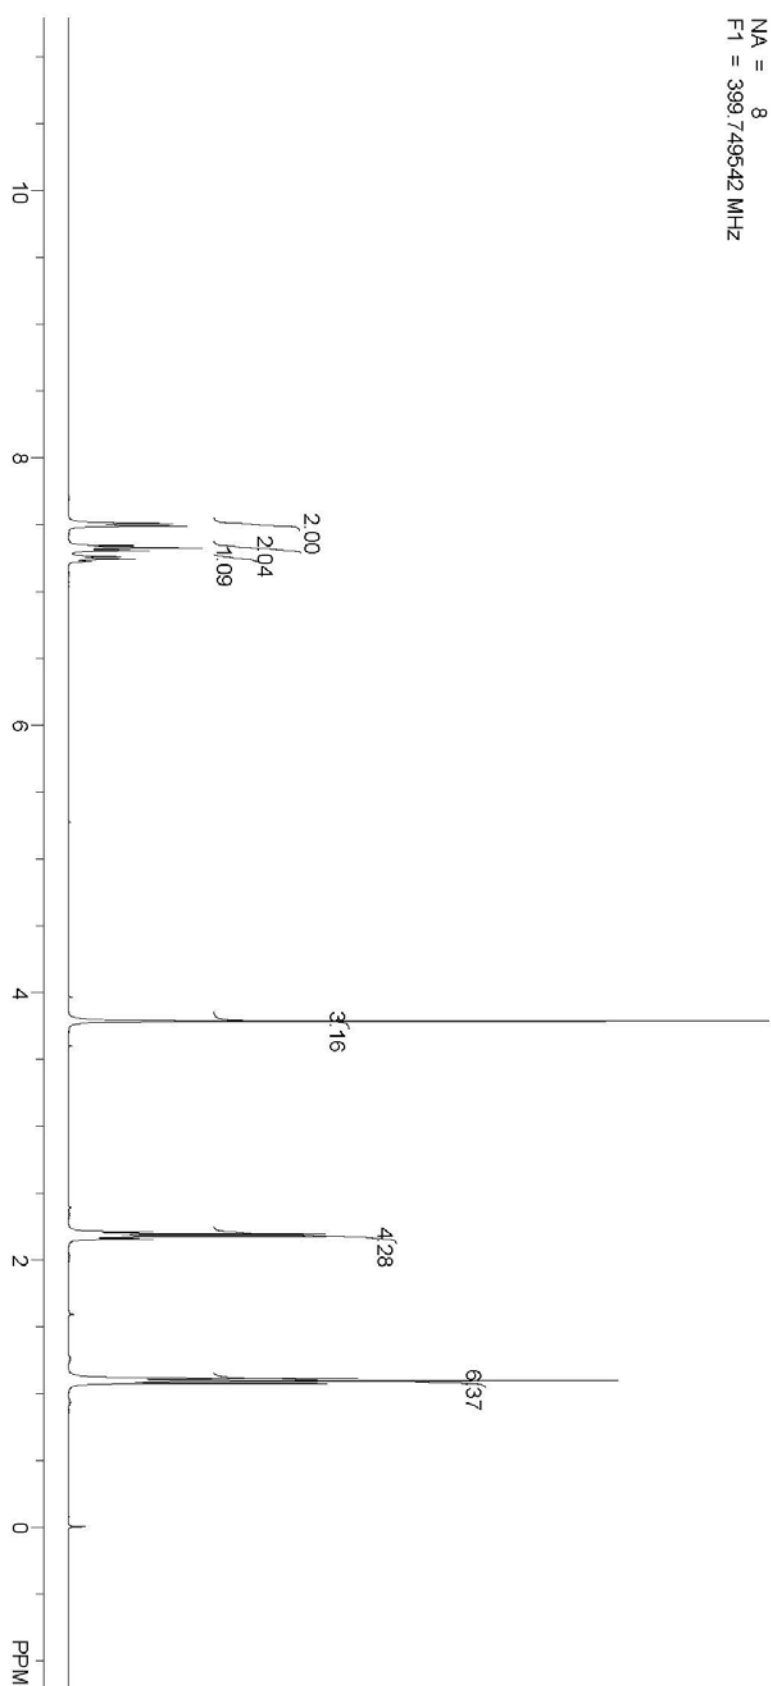

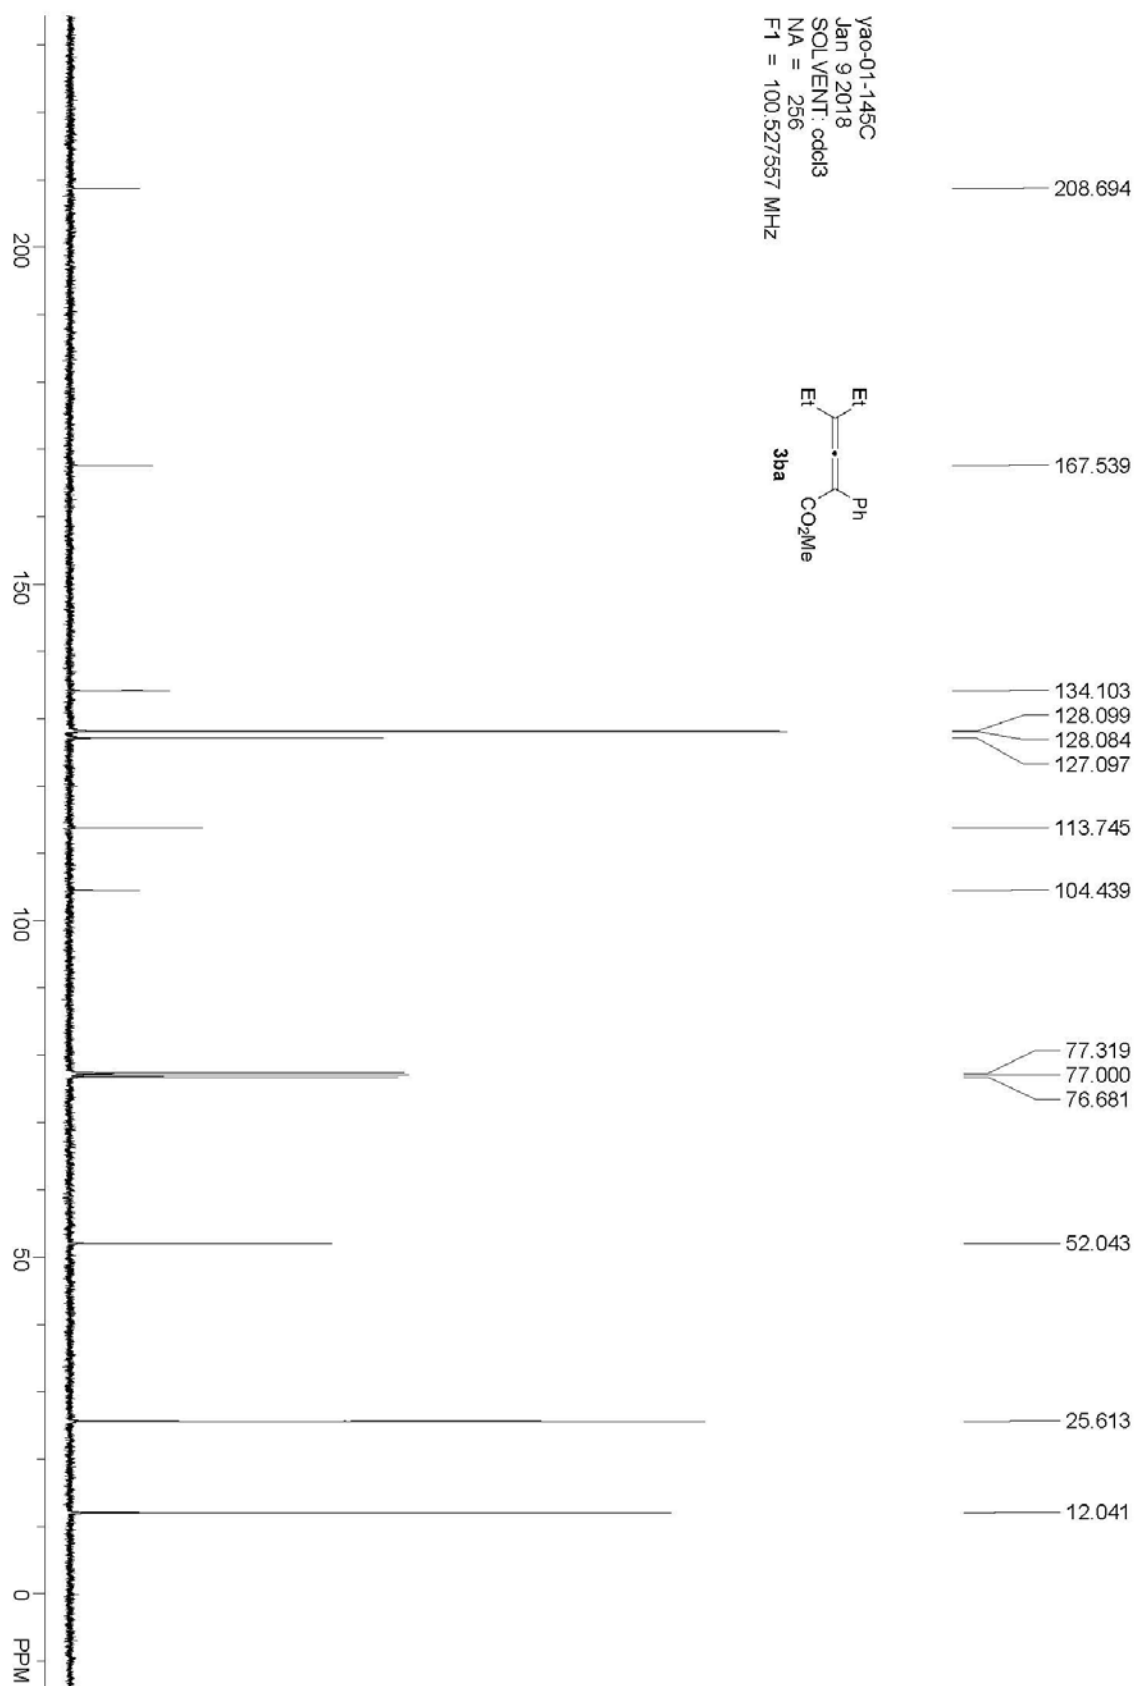

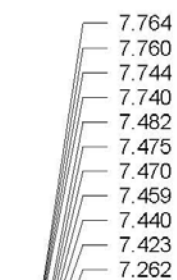

yao-01-140  
Dec 30 2017  
SOLVENT: cdcl3  
NA = 8  
F1 = 399.749542 MHz

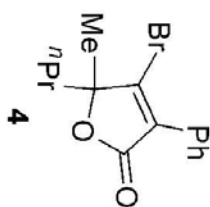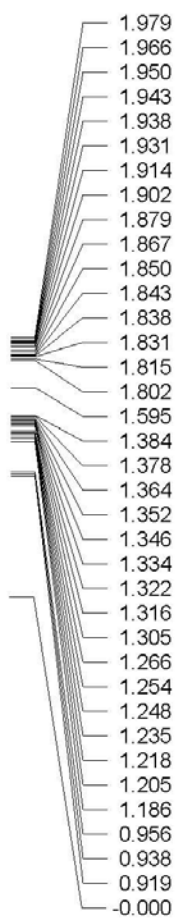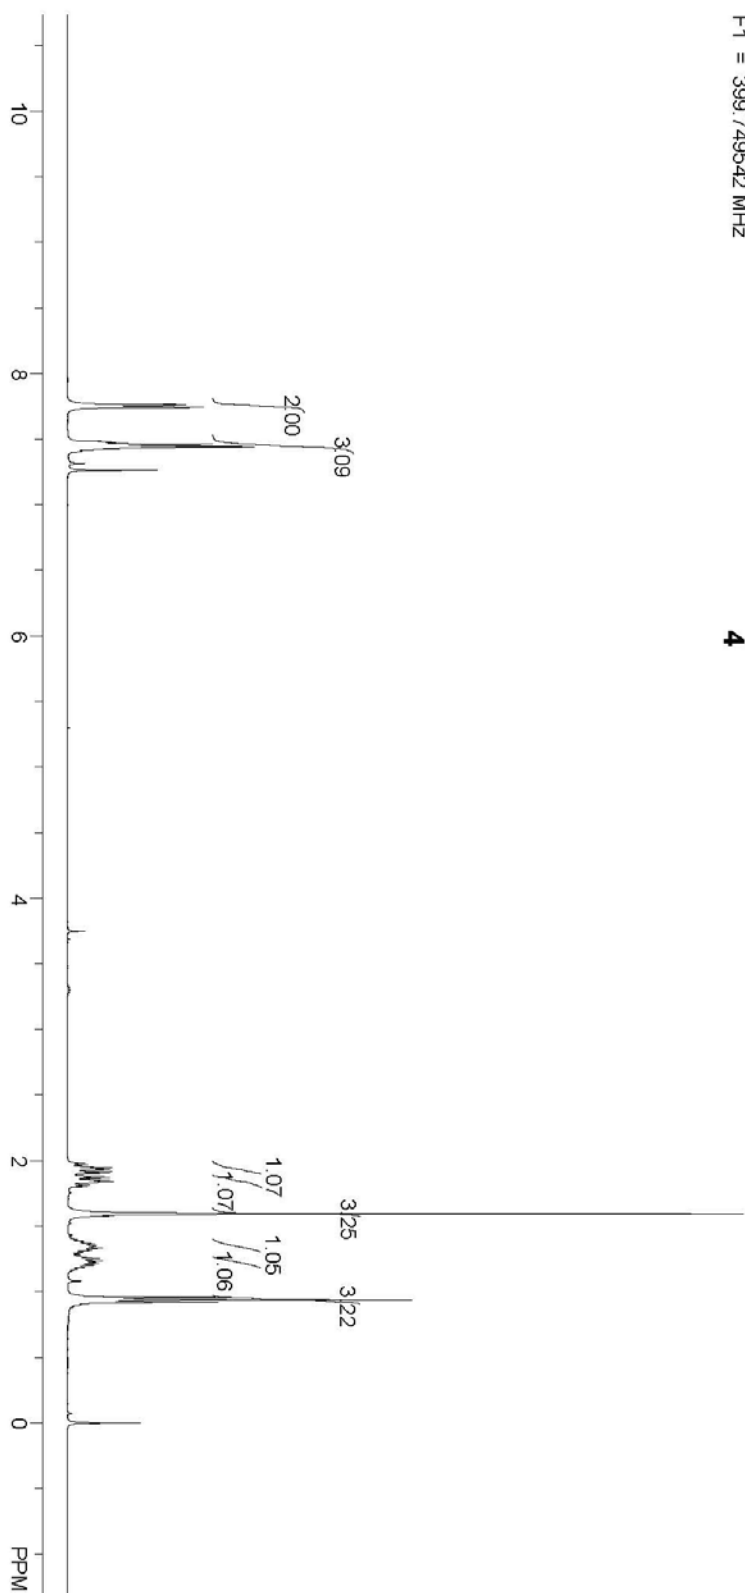

yao-01-140C  
 Dec 30 2017  
 SOLVENT: cdcl3  
 NA = 256  
 F1 = 100.527557 MHz

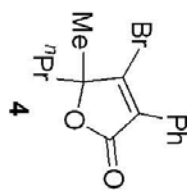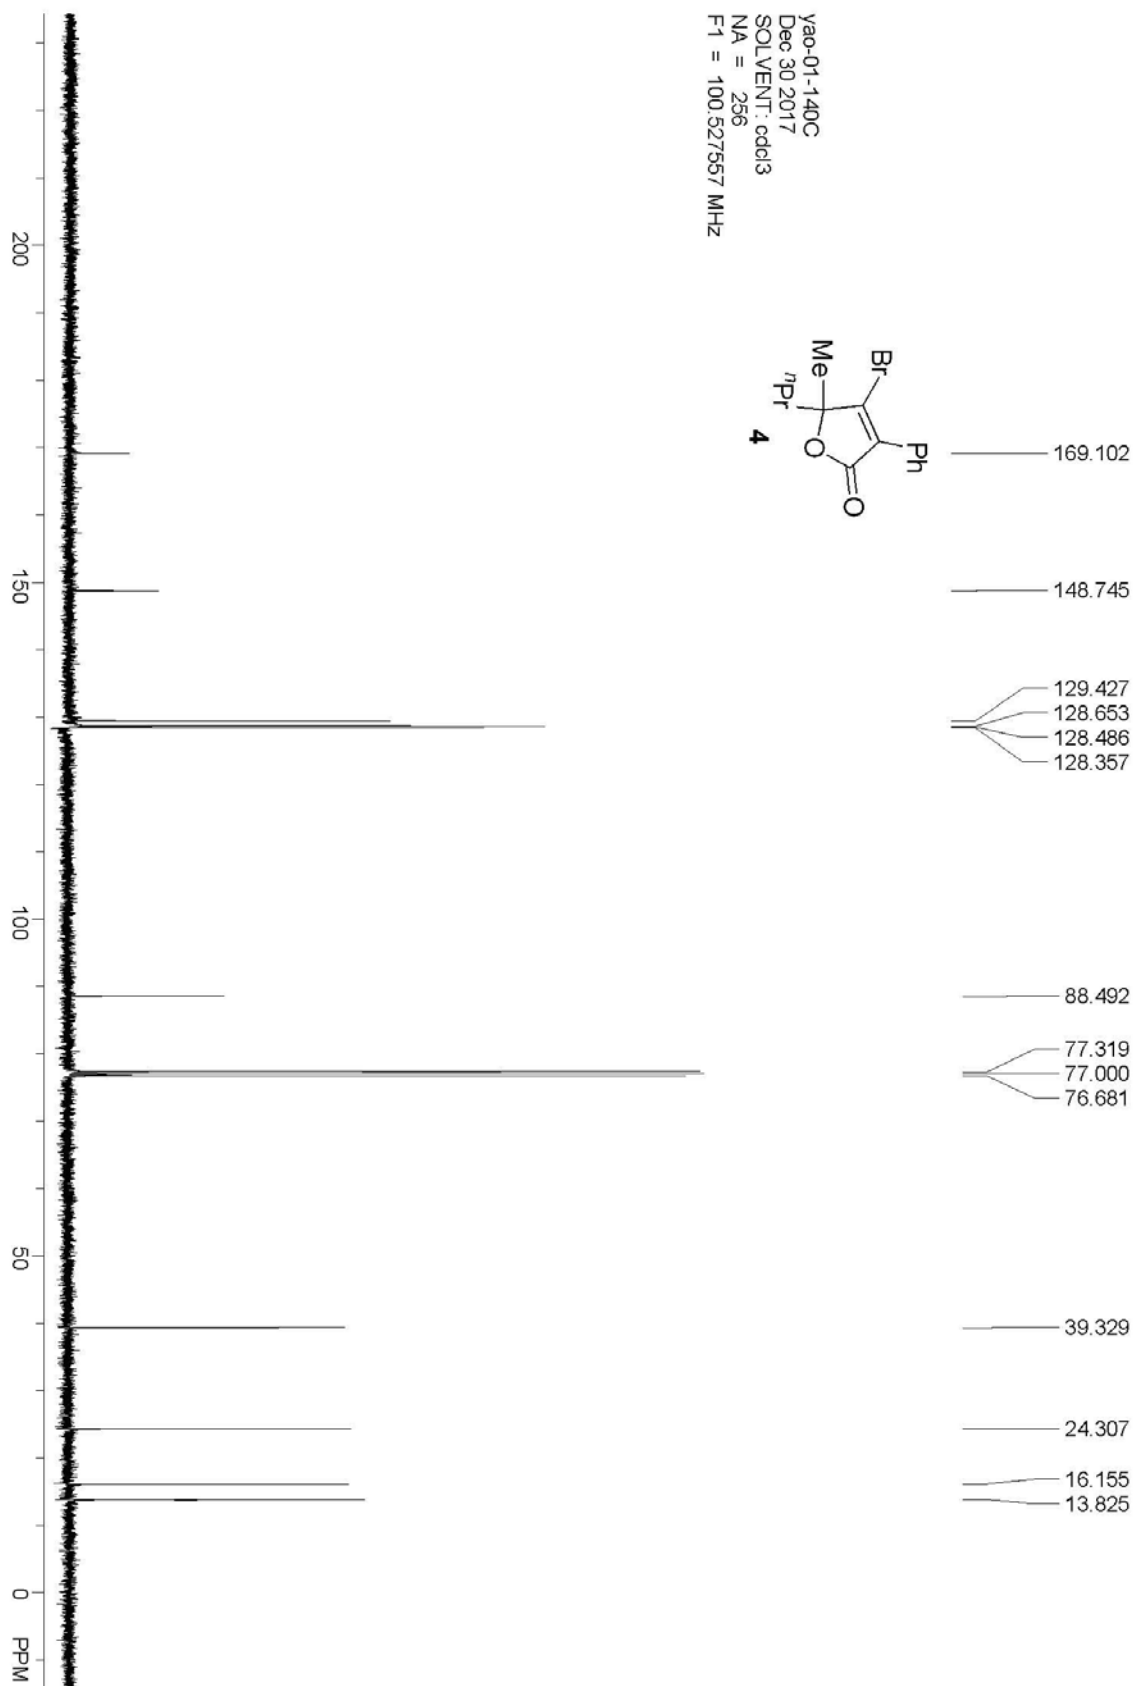

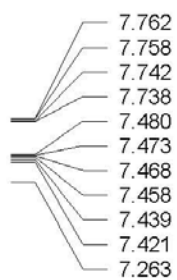

7.762  
7.758  
7.742  
7.738  
7.480  
7.473  
7.468  
7.458  
7.439  
7.421  
7.263

4.929

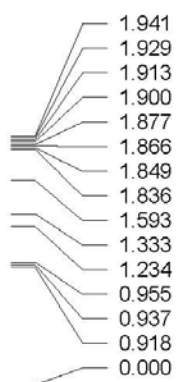

1.941  
1.929  
1.913  
1.900  
1.877  
1.866  
1.849  
1.836  
1.593  
1.333  
1.234  
0.955  
0.937  
0.918  
0.000

Purity (98%) determined by using  $\text{CH}_2\text{Br}_2$  (17.5  $\mu\text{L}$ , 0.25 mmol) as the standard in 29.7 mg of sample

yao-01-140ccd  
Jan 6 2018  
SOLVENT: cdcl3  
NA = 4  
F1 = 399.749542 MHz

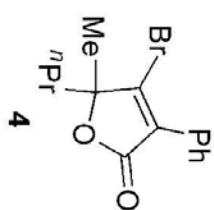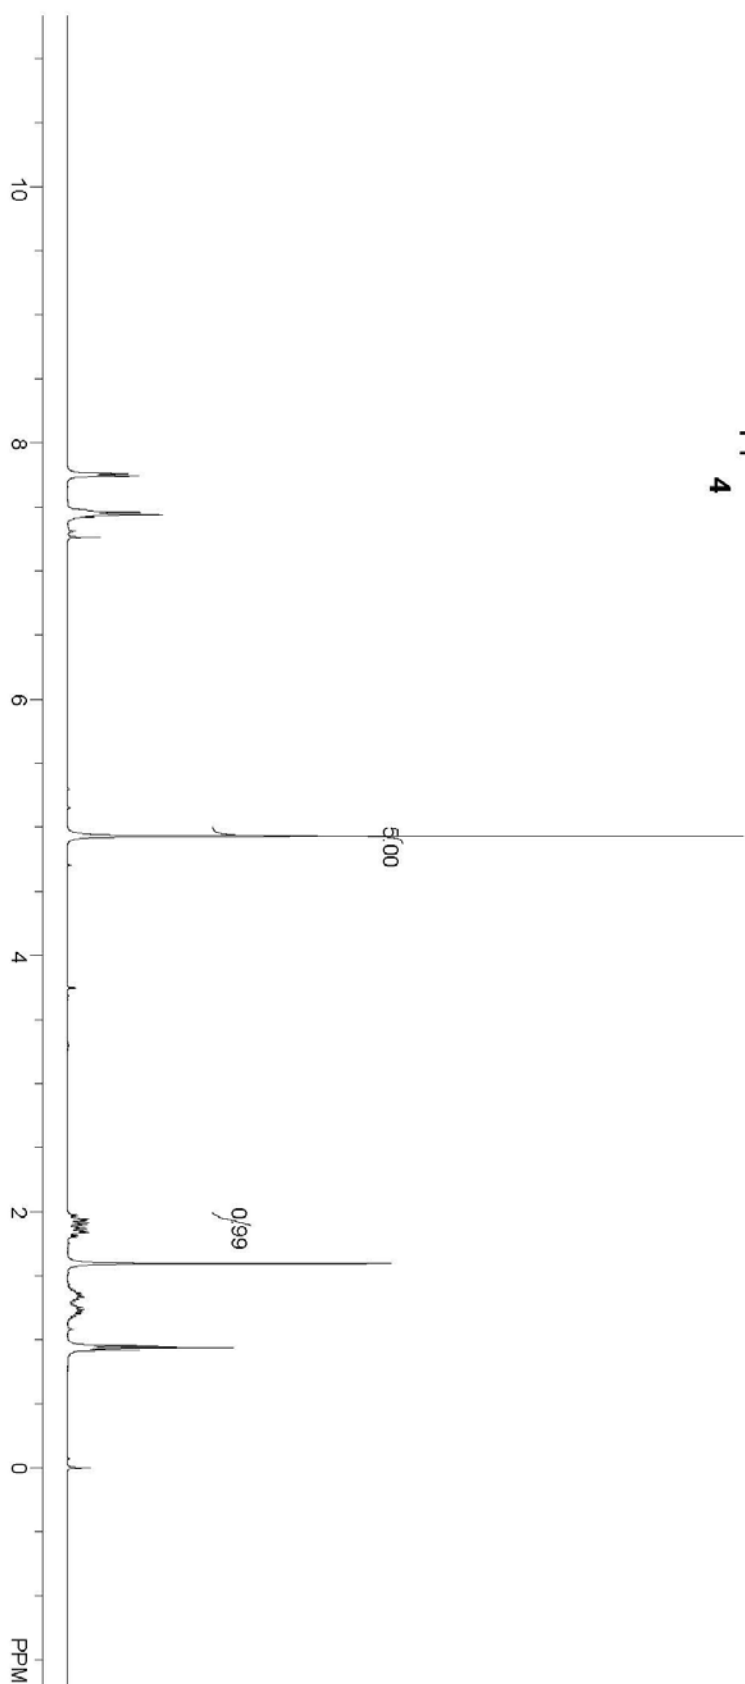

yao-01-142  
 Jan 1 2018  
 SOLVENT: cdcl3  
 NA = 8  
 F1 = 399.749542 MHz

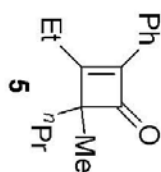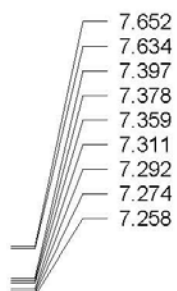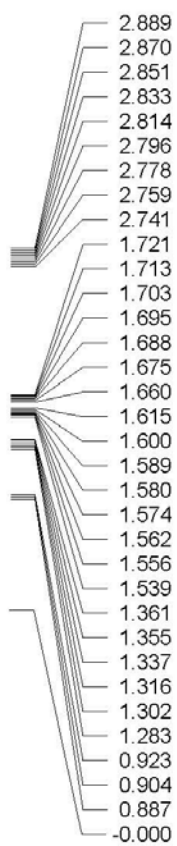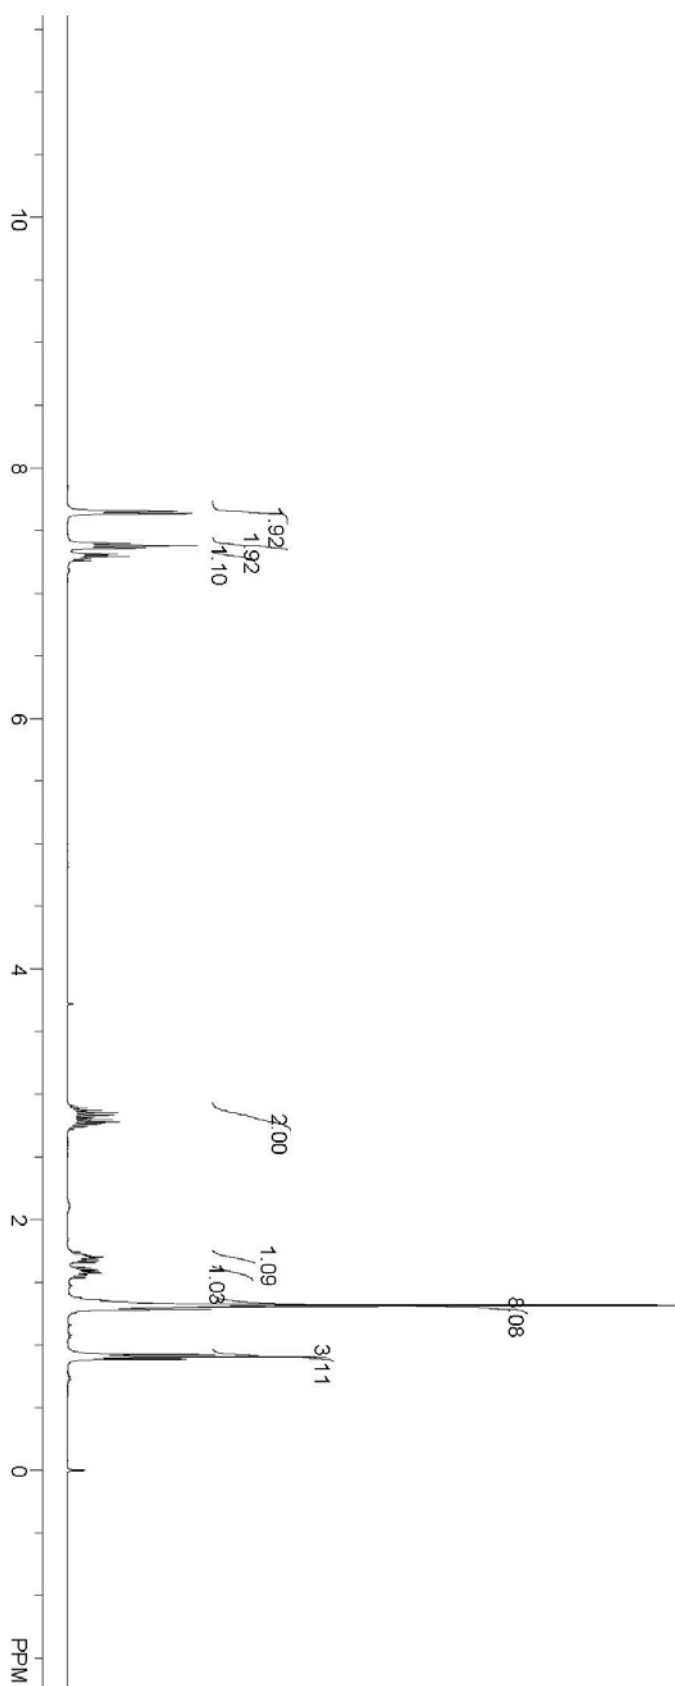

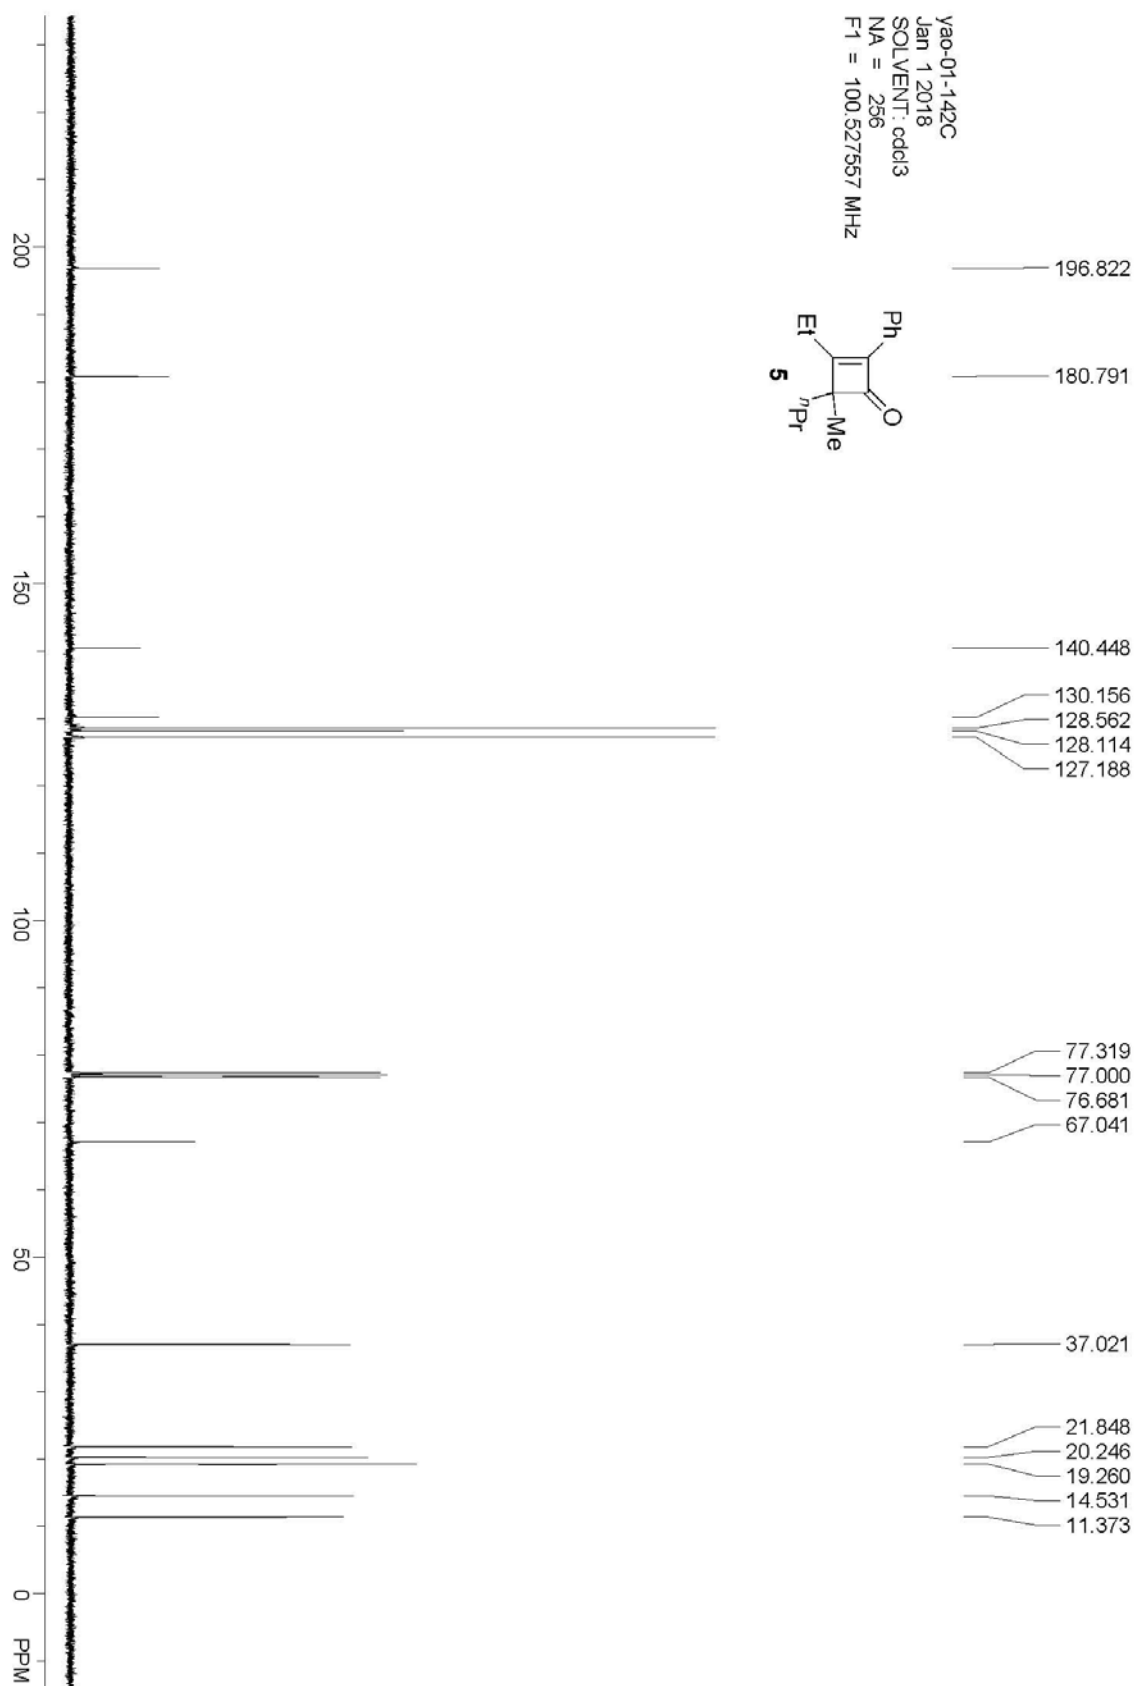

yao-01-142ccd  
 Jan 6 2018  
 SOLVENT: cdcl3  
 NA = 4  
 F1 = 399.749542 MHz

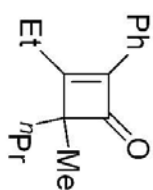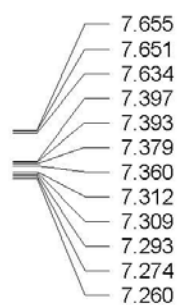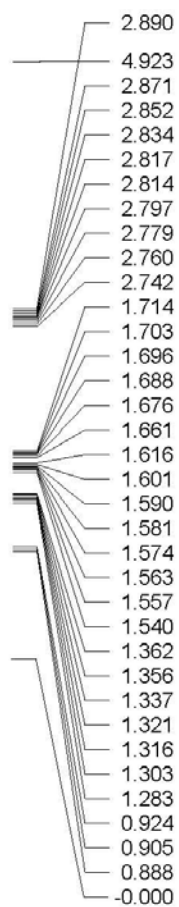

Purity (99%) determined by using CH<sub>2</sub>Br<sub>2</sub> (14.0  $\mu$ L, 0.2 mmol)  
 as the internal standard in 45.5 mg of sample

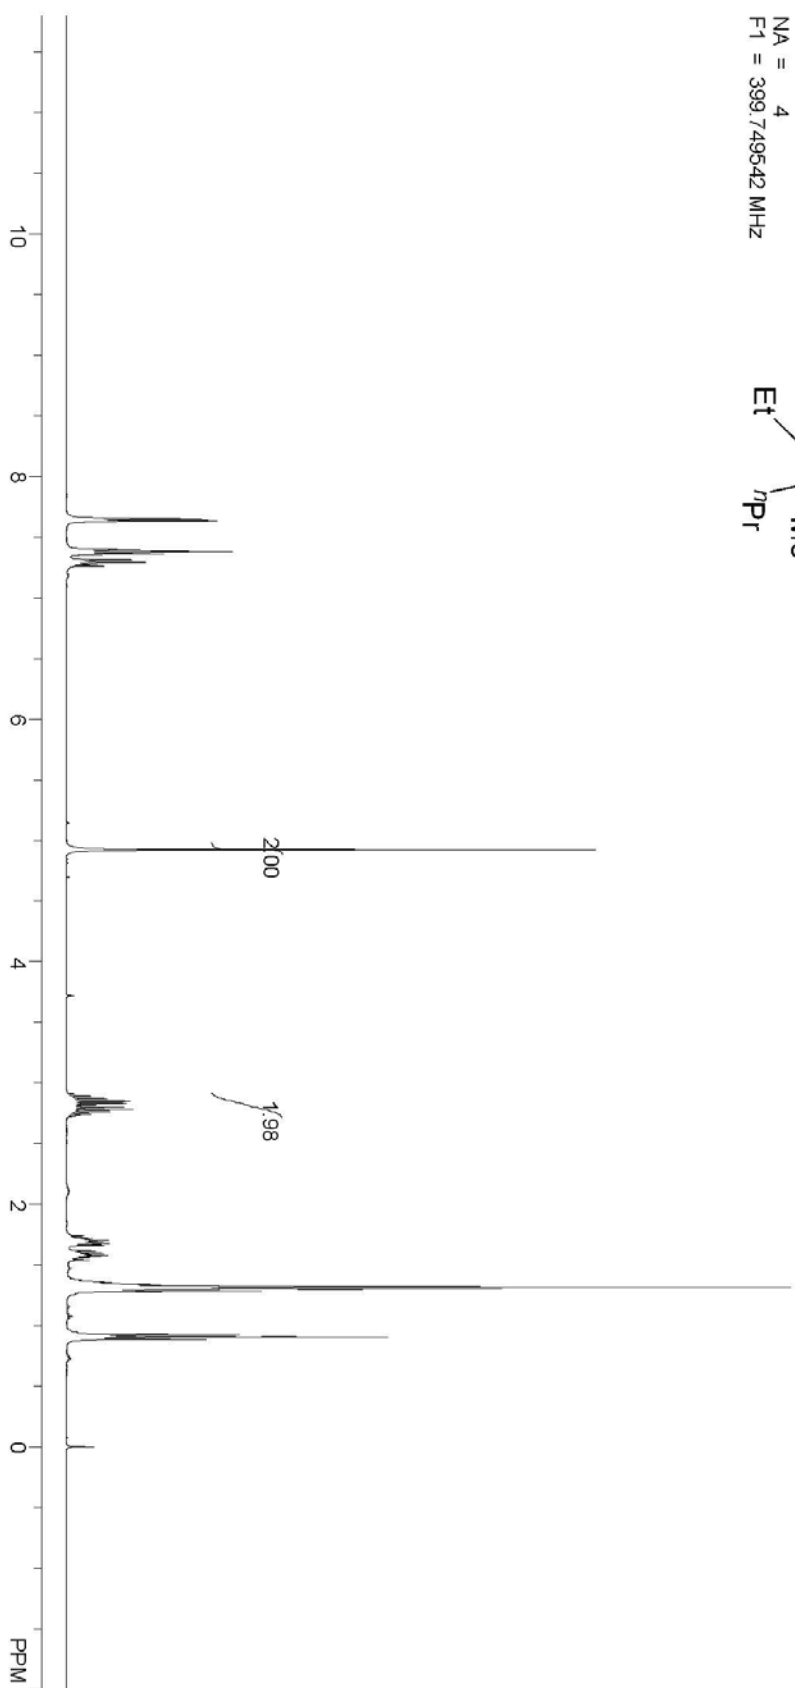

yao-01-136  
Dec 25 2017  
SOLVENT: cdcl3  
NA = 8  
F1 = 399.749542 MHz

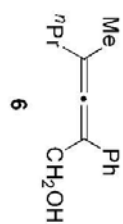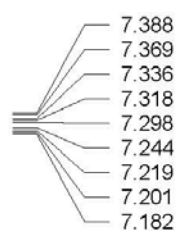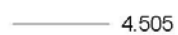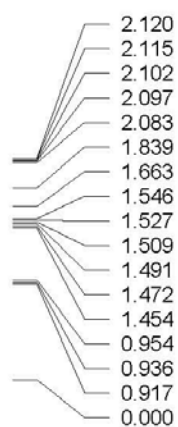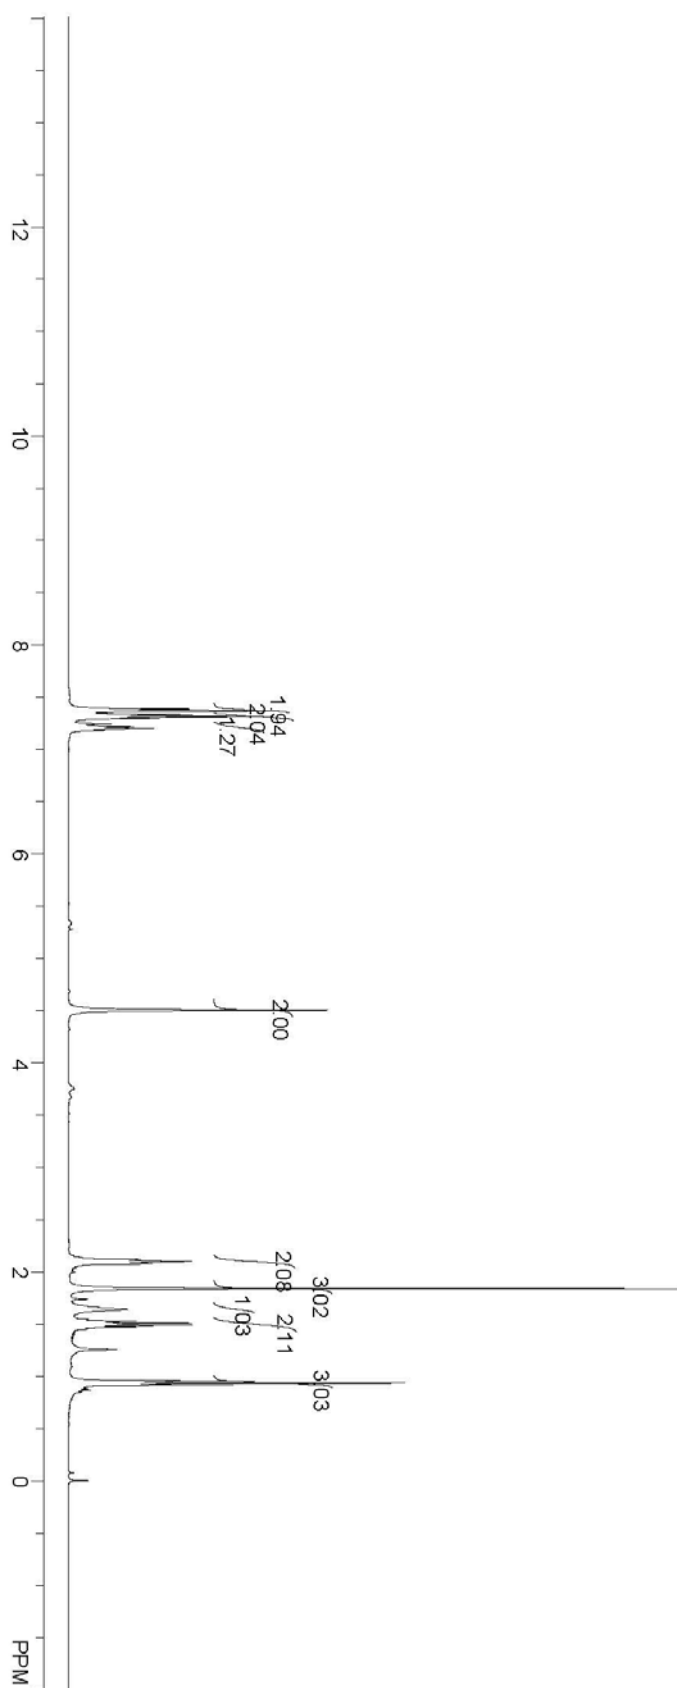

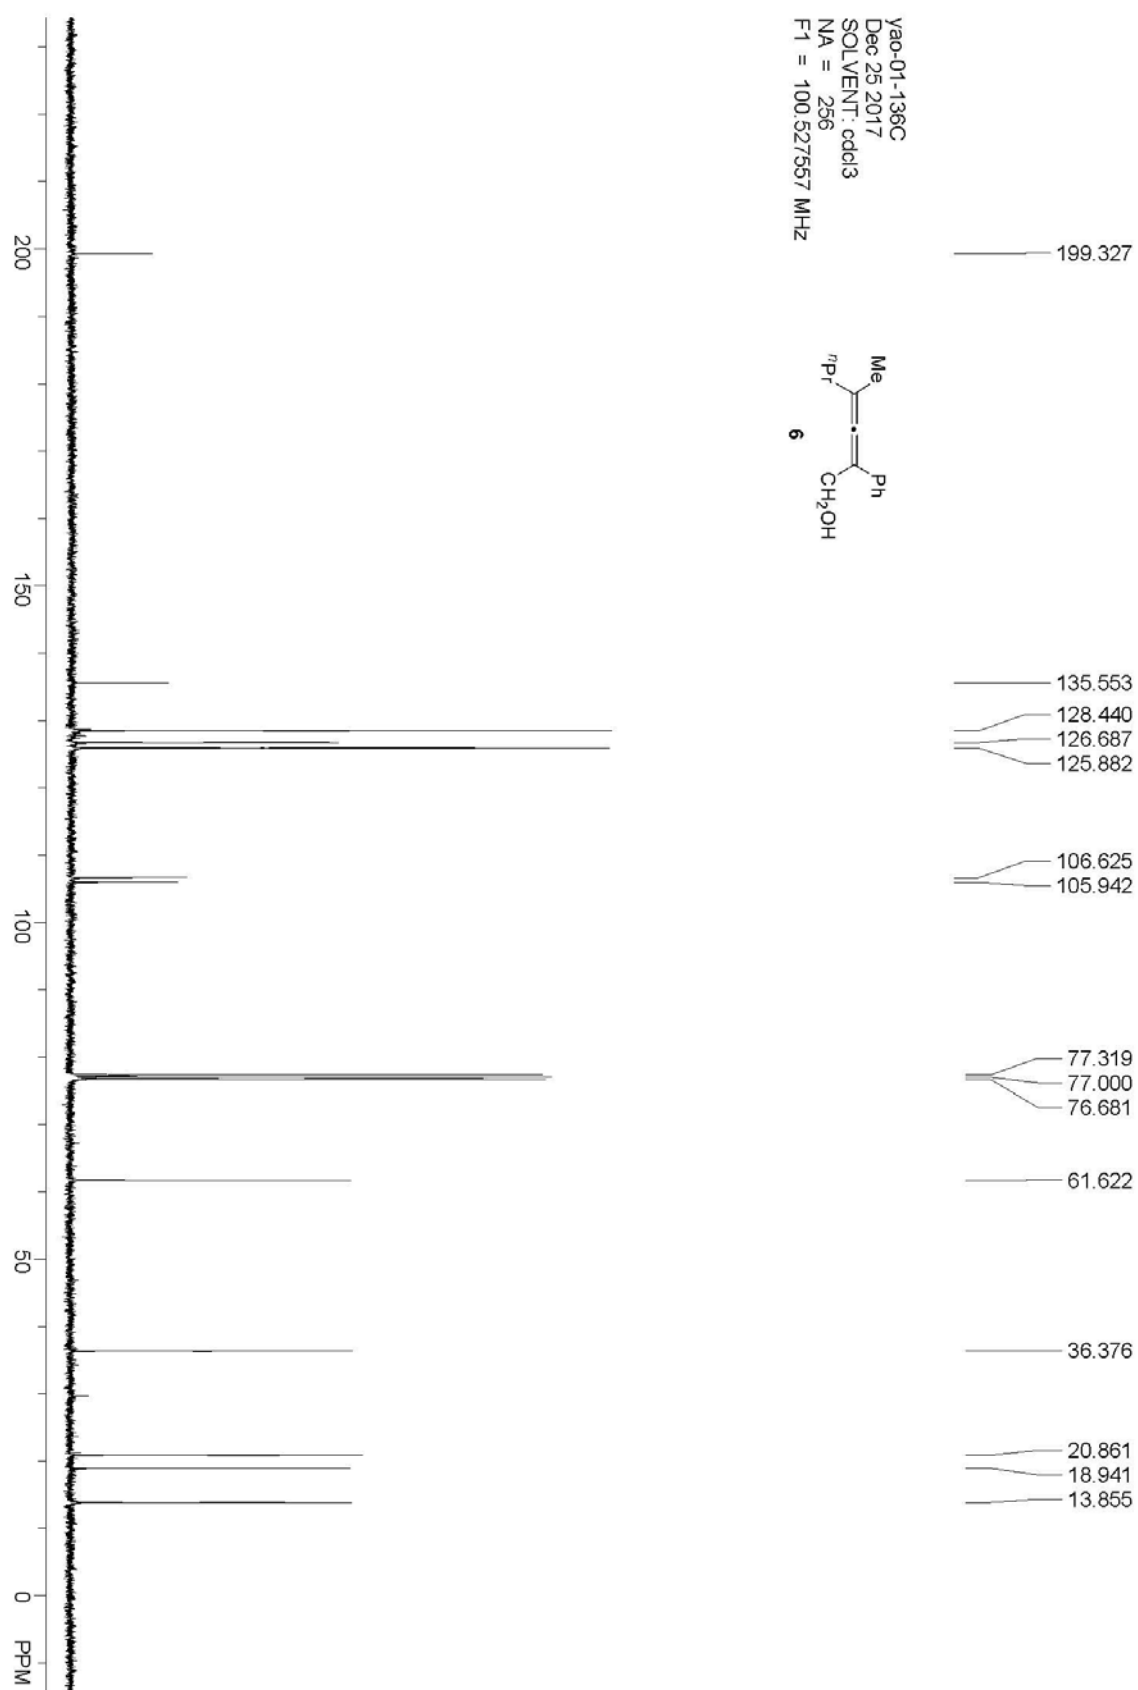

yao-01-136ccd  
Dec 27 2017  
SOLVENT: cdcl3  
NA = 4  
F1 = 399.749542 MHz

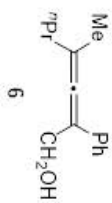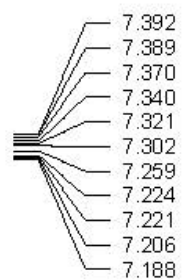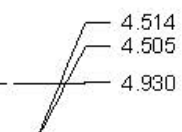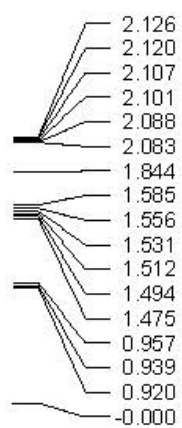

Purity (93%) determined by using CH<sub>2</sub>Br<sub>2</sub> (14.0  $\mu$ L, 0.2 mmol)  
as the internal standard in 18.4 mg of sample

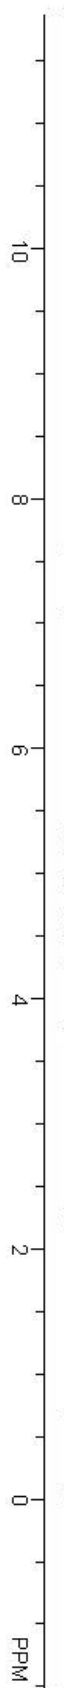

yao-01-149  
 Jan 12 2018  
 SOLVENT: cdcl3  
 NA = 8  
 F1 = 399.749542 MHz

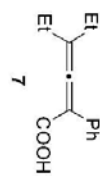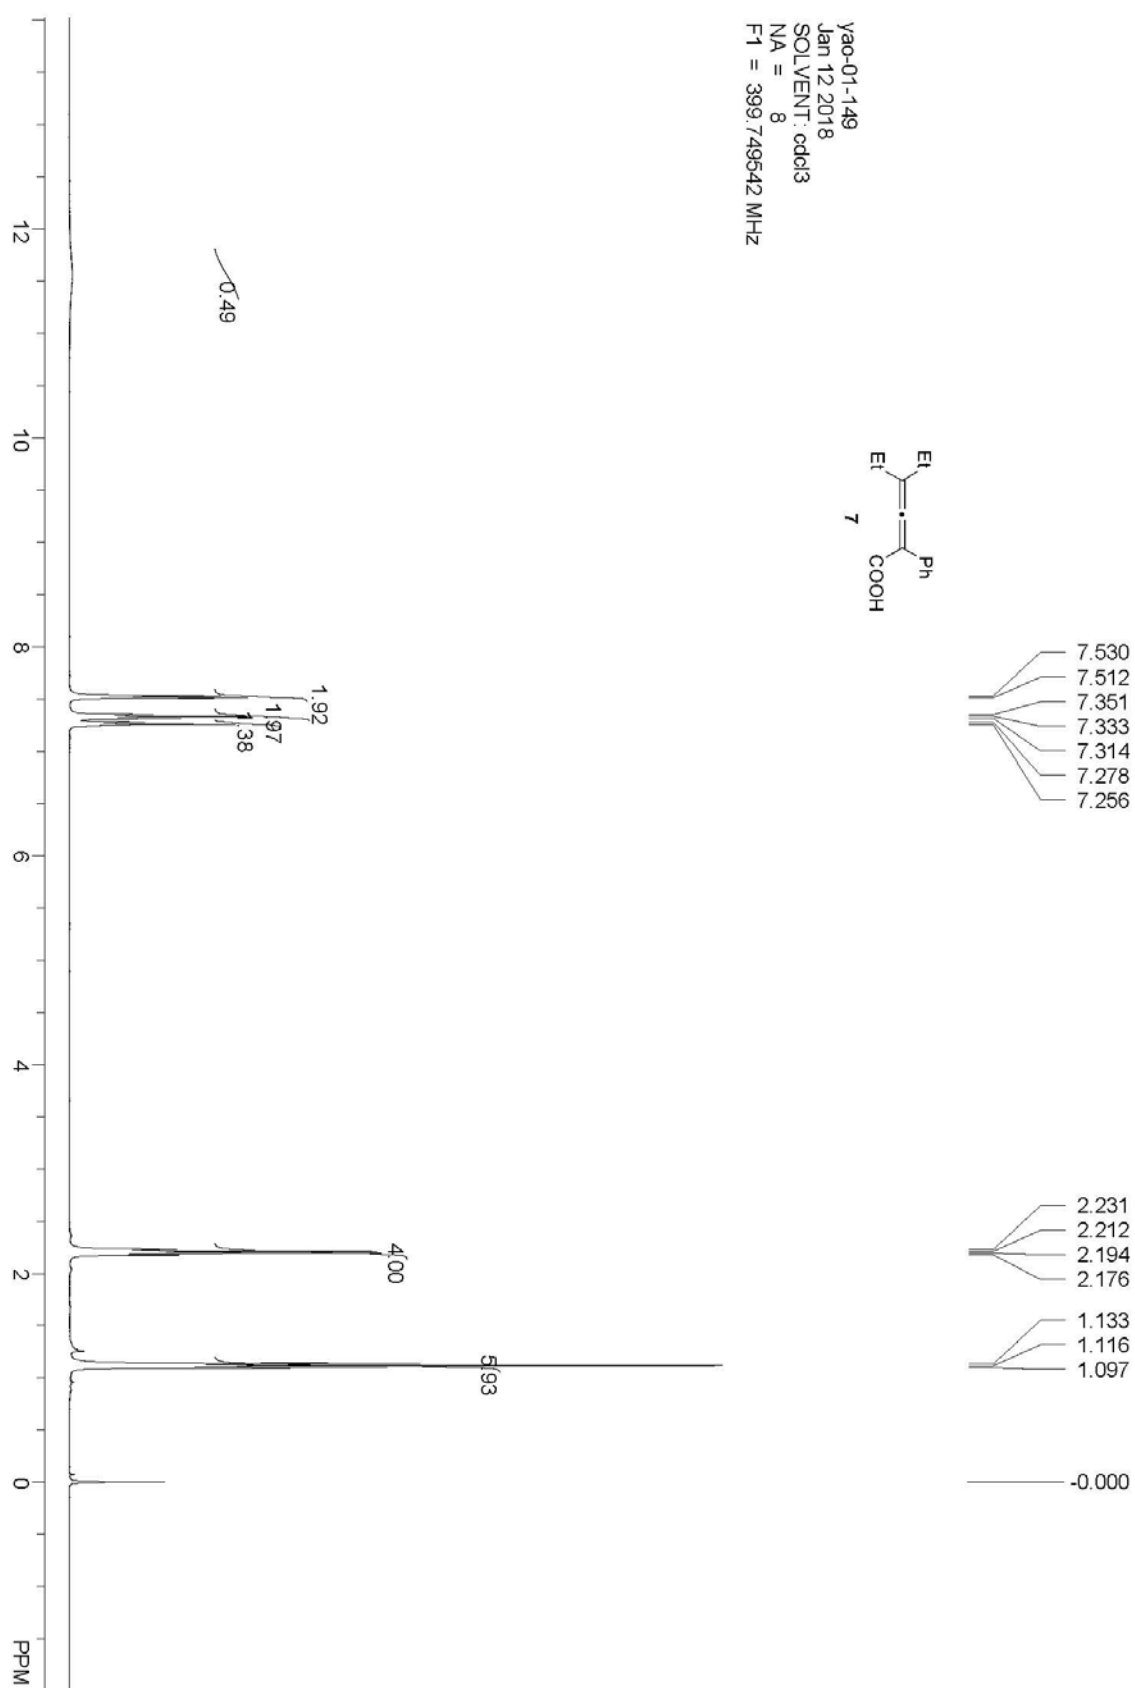

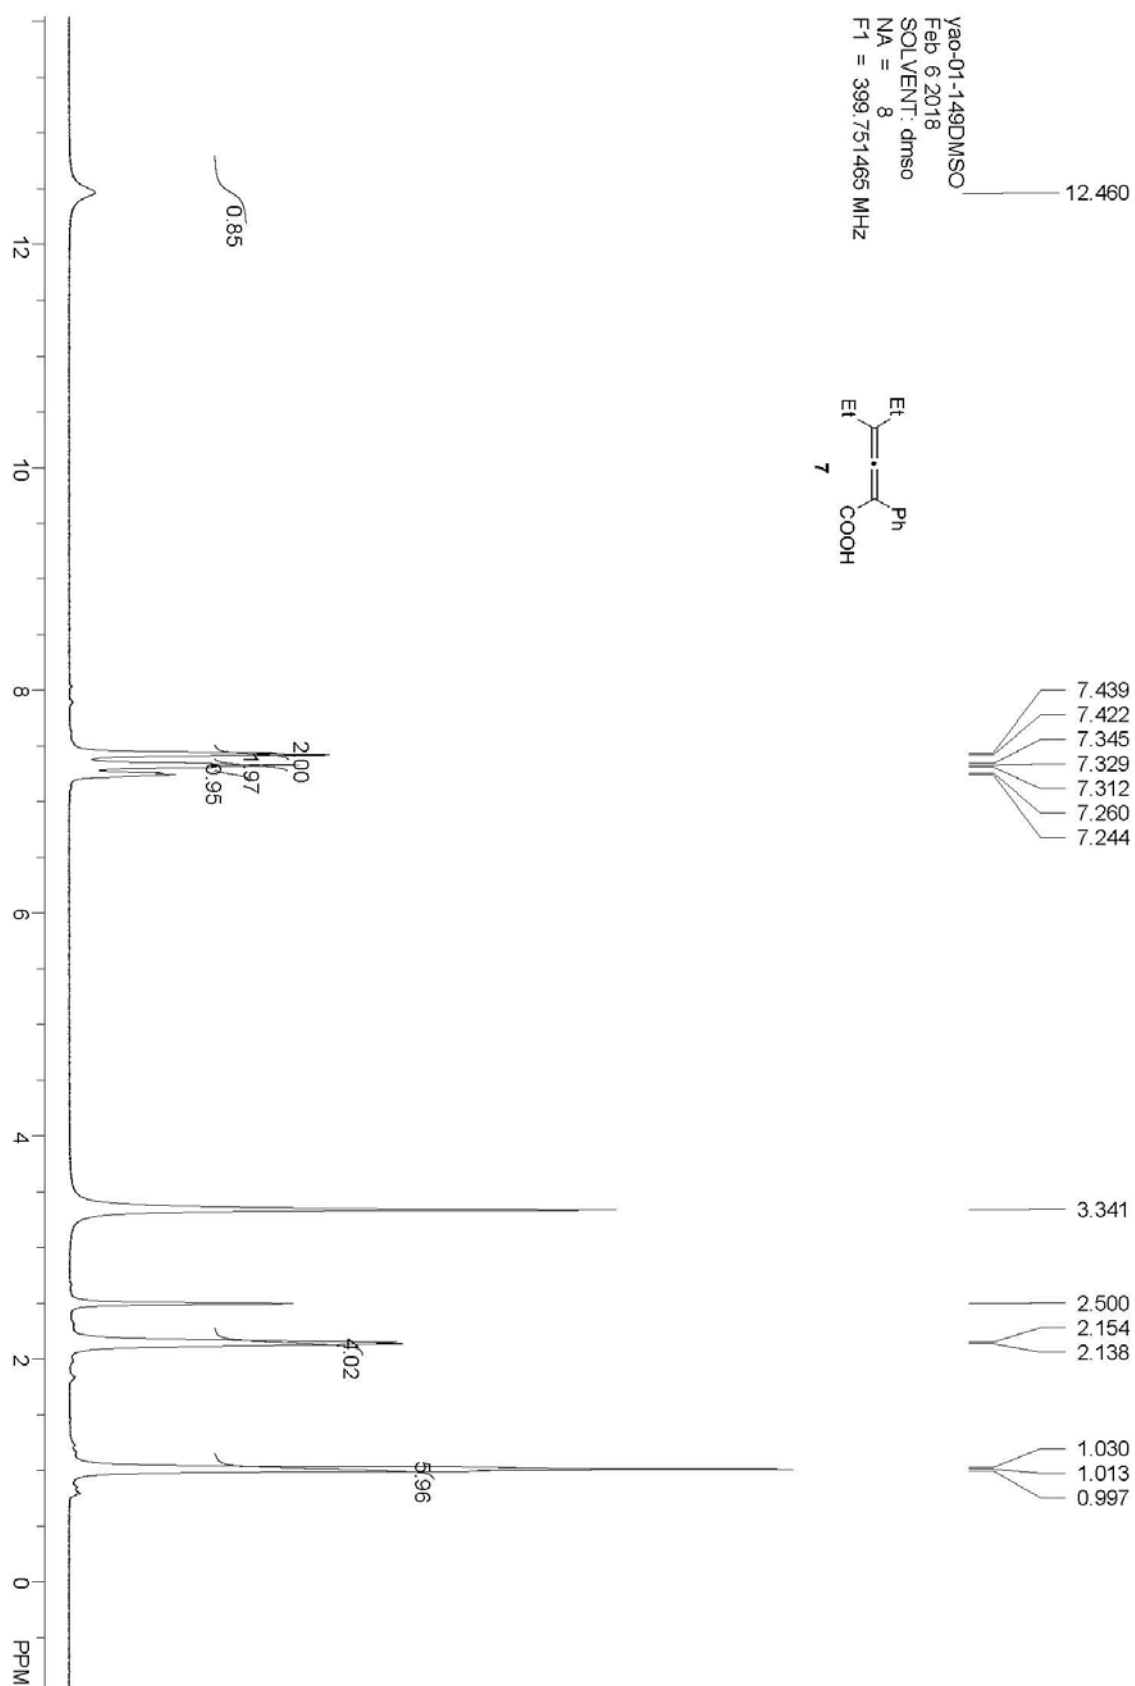

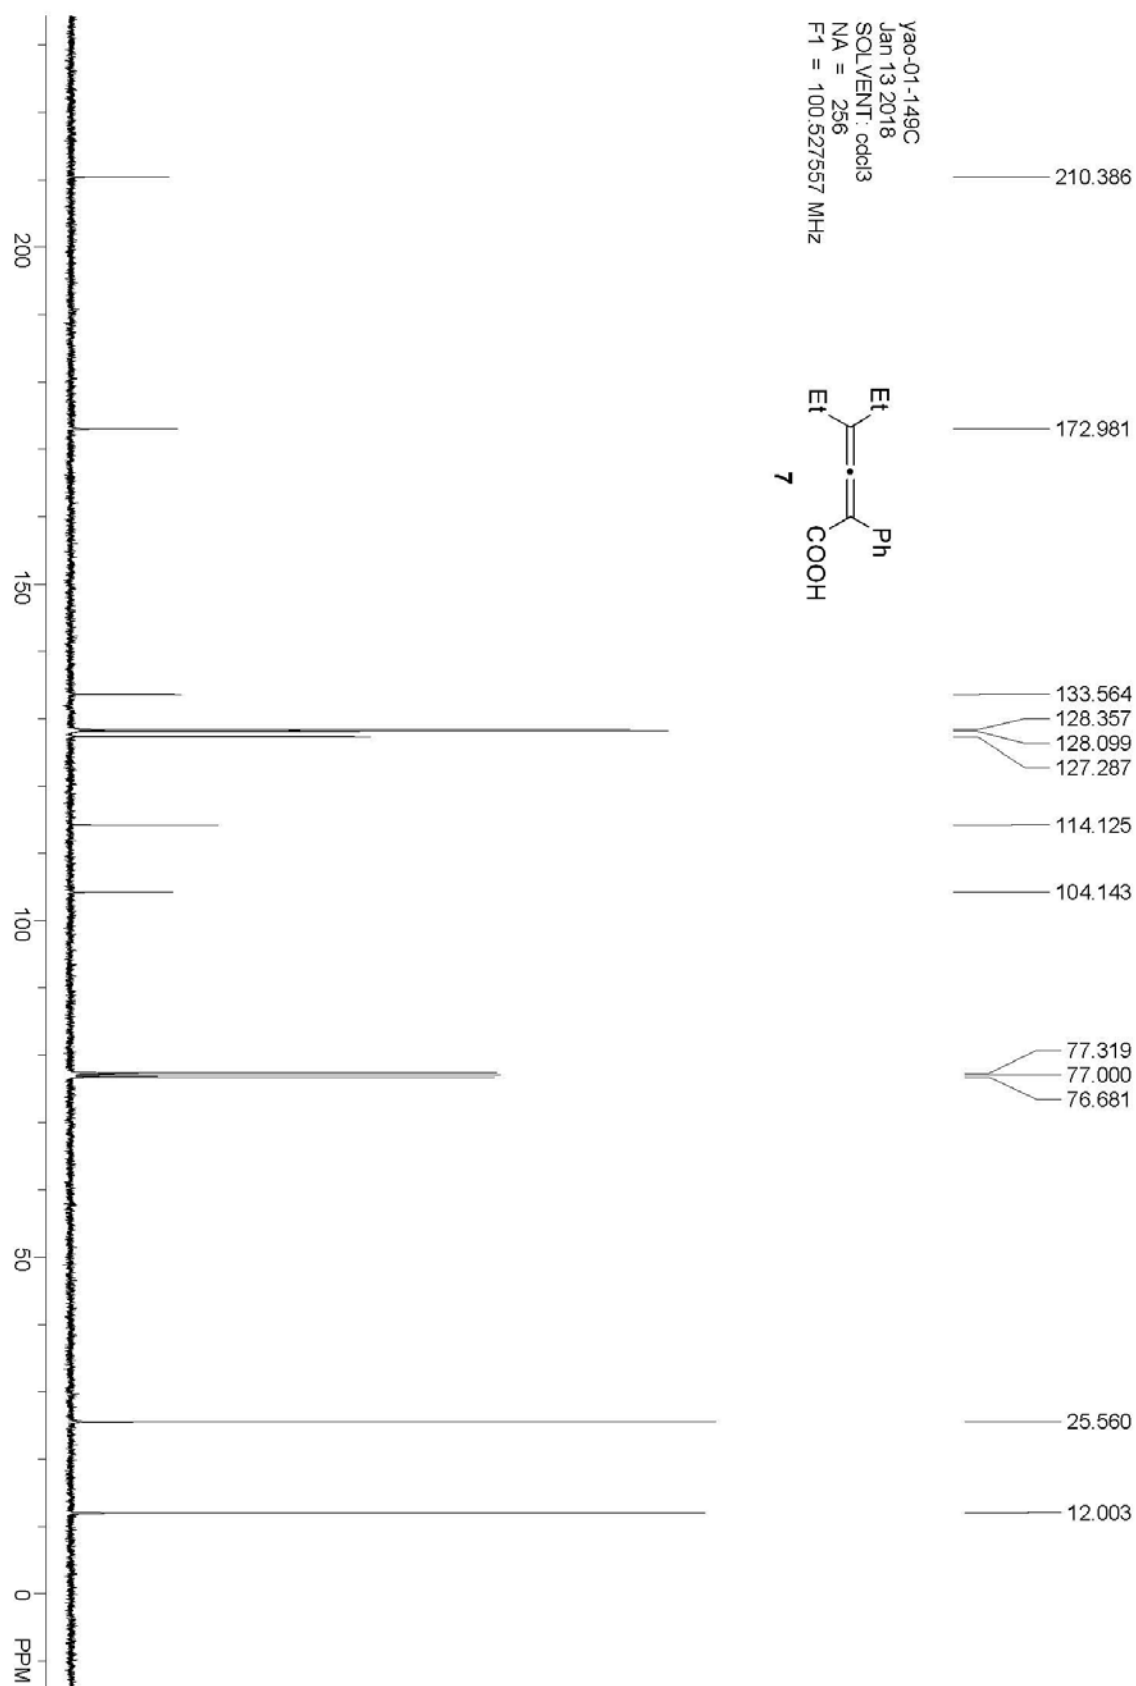

Supplement: c8qo01202d1.pdf [file c8qo01202d1.pdf]
